# Supplementary material for: Predictive metabolomic profiling of microbial communities using amplicon or metagenomic sequences
Source: PubMed Central journal article supplement (PMC6637180; doi:10.1038/s41467-019-10927-1), 2019-07-17

azelate (C18-neg\_Cluster\_0045): Spearman 0.51

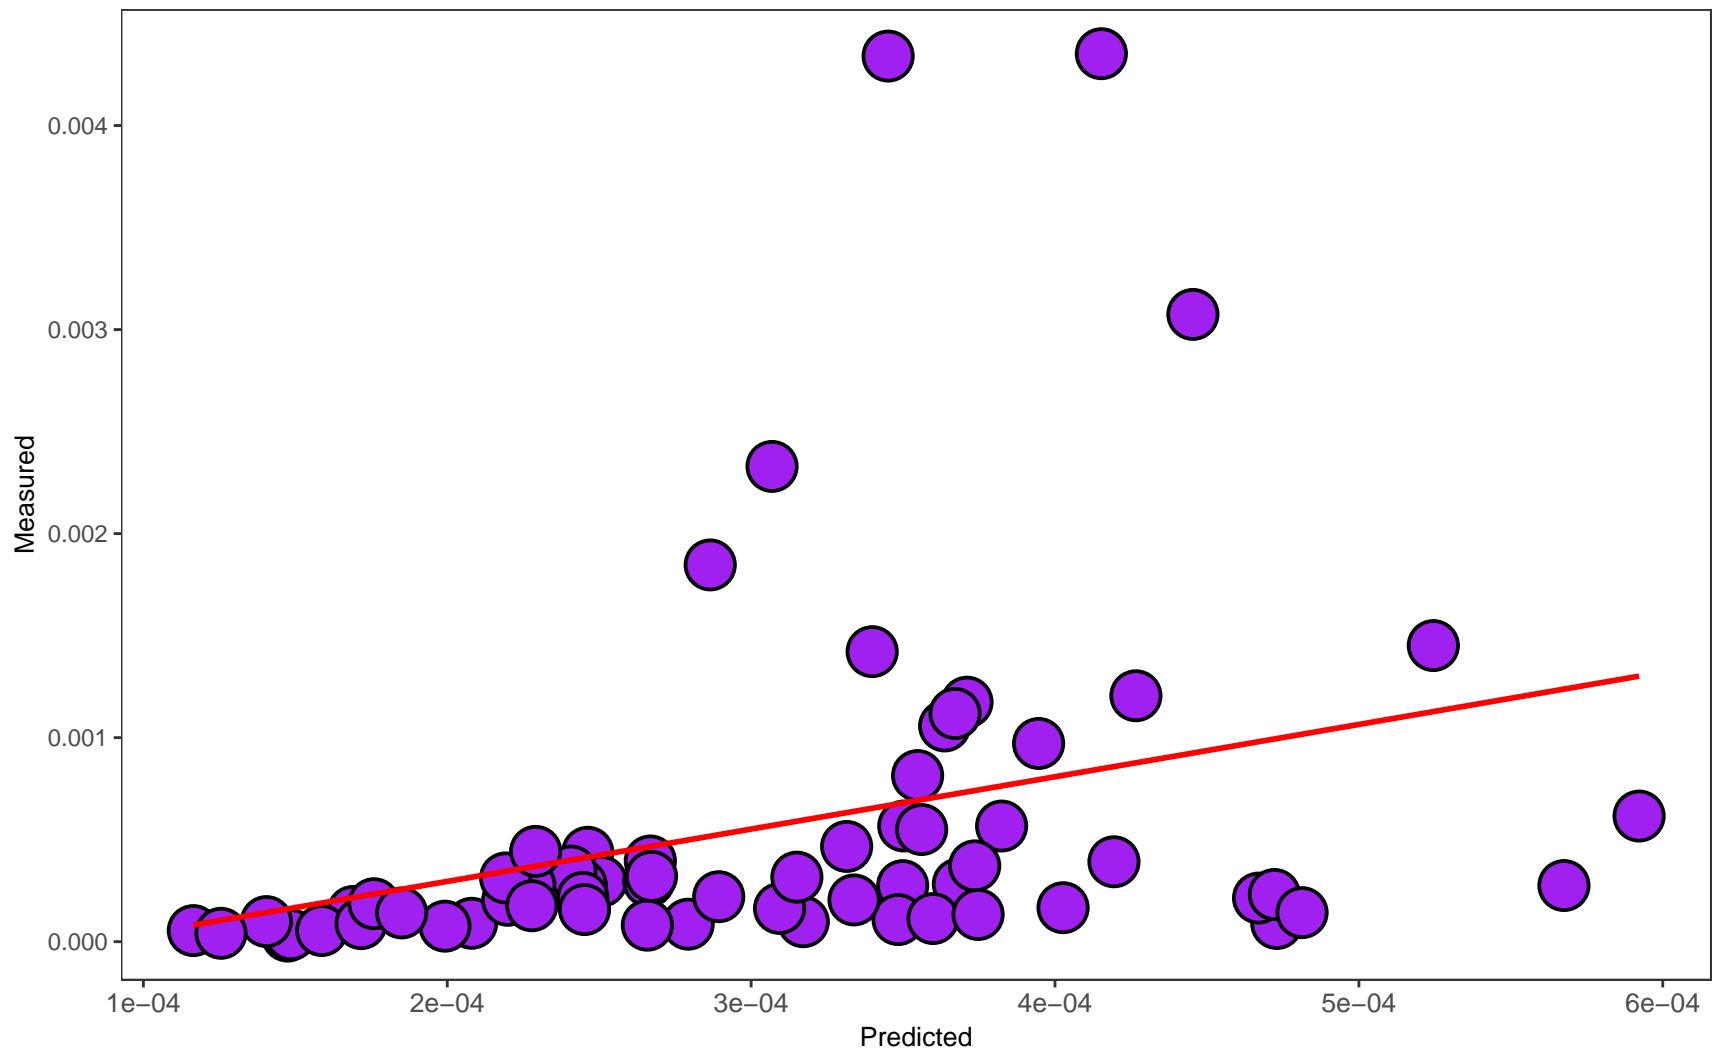

sebacate (C18-neg\_Cluster\_0064): Spearman 0.44

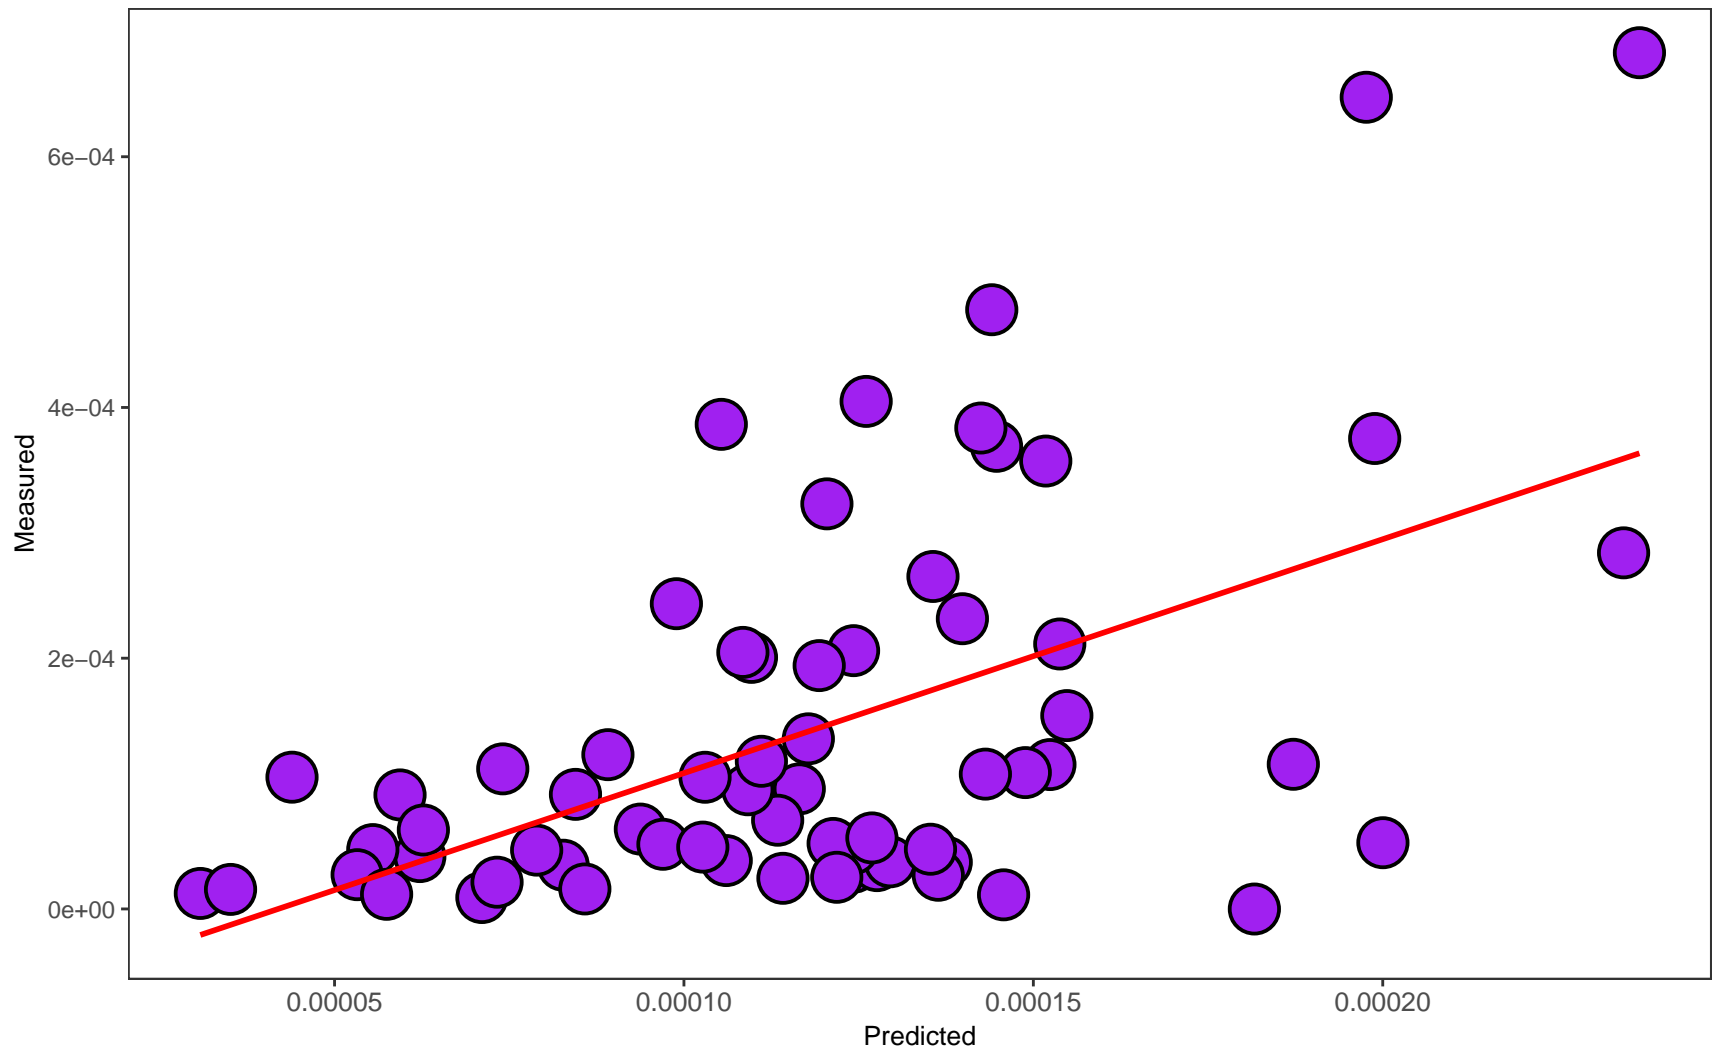

undecanedionate (C18-neg\_Cluster\_0079): Spearman 0.48

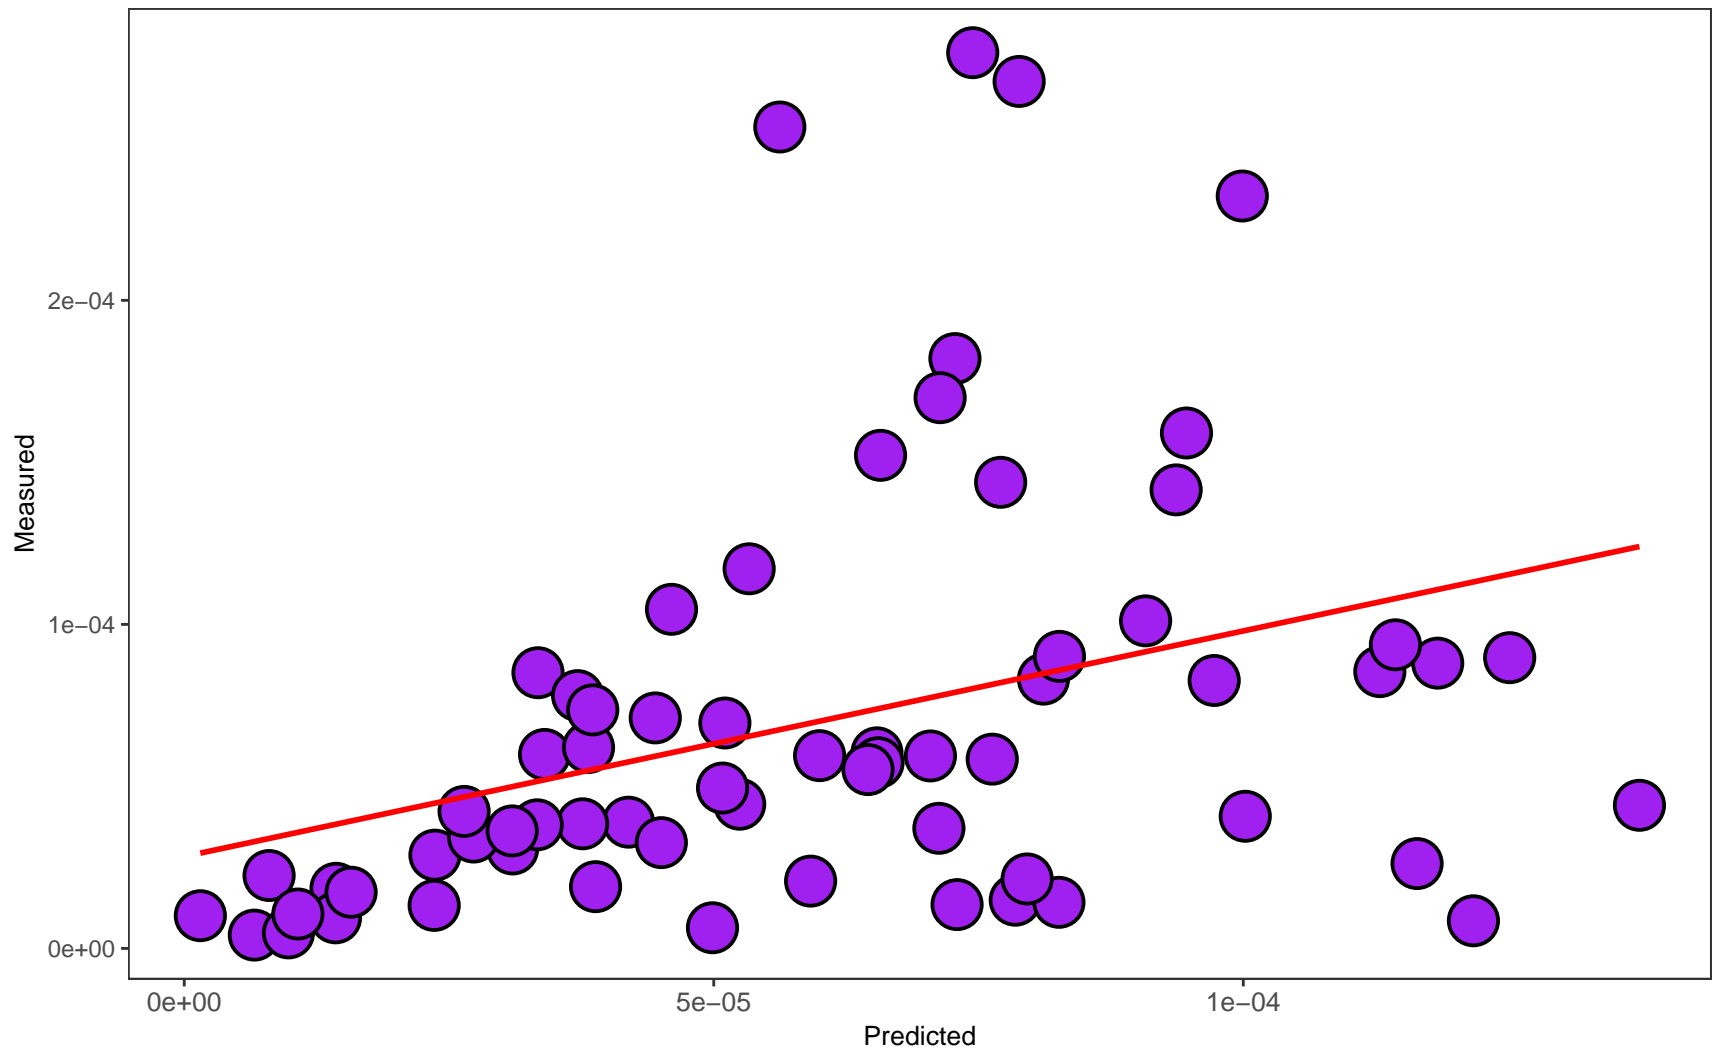

2-hydroxymyristic acid (C18-neg\_Cluster\_0144): Spearman 0.42

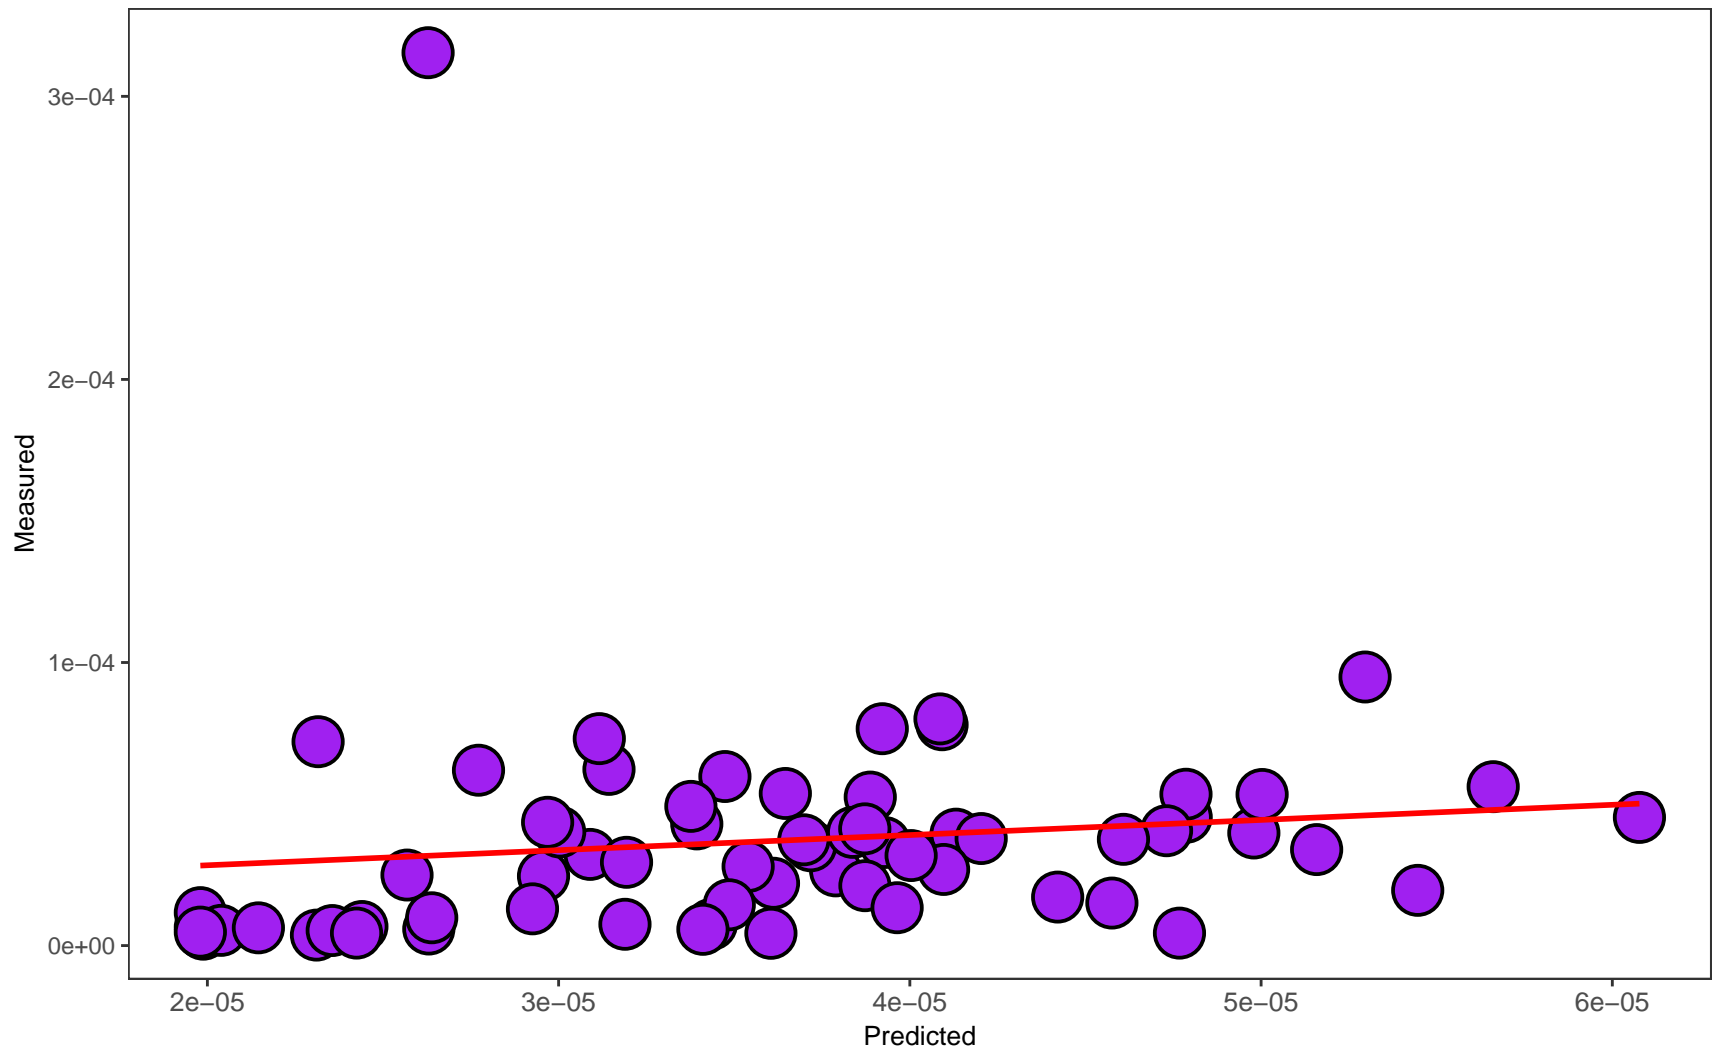

arachidonic acid (C18-neg\_Cluster\_0354): Spearman 0.31

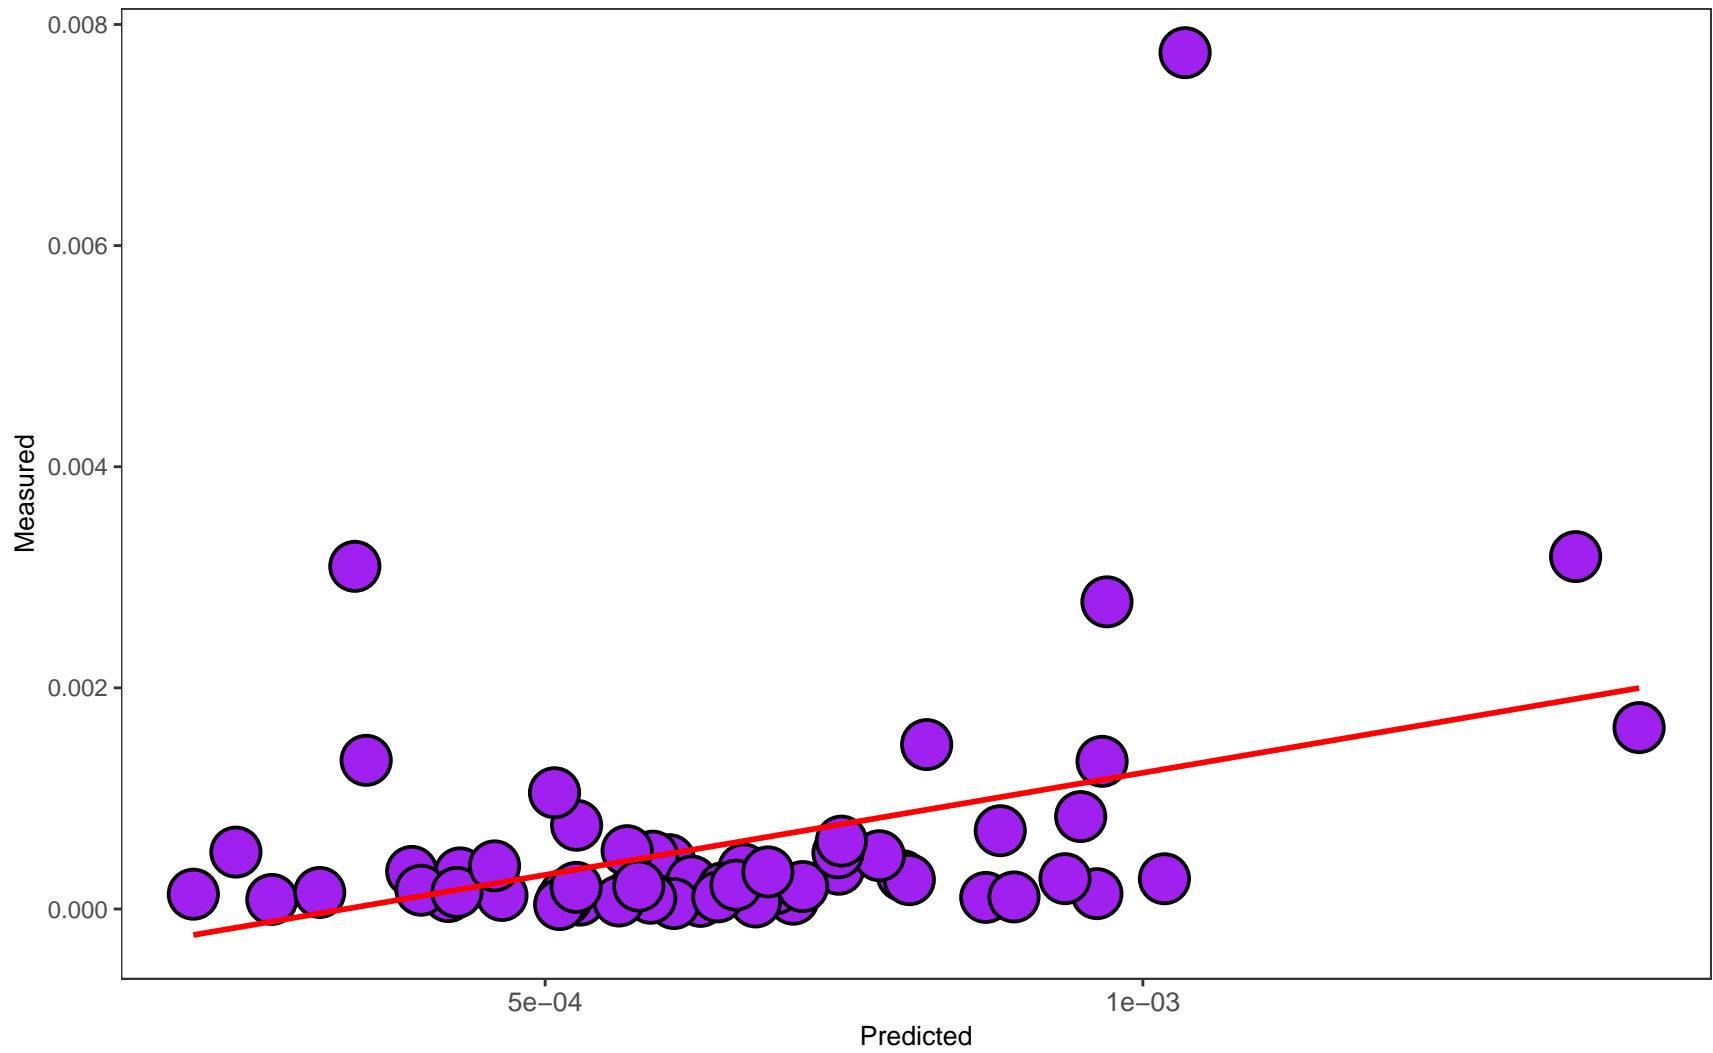

eicosatrienoic acid (C18-neg\_Cluster\_0361): Spearman 0.6

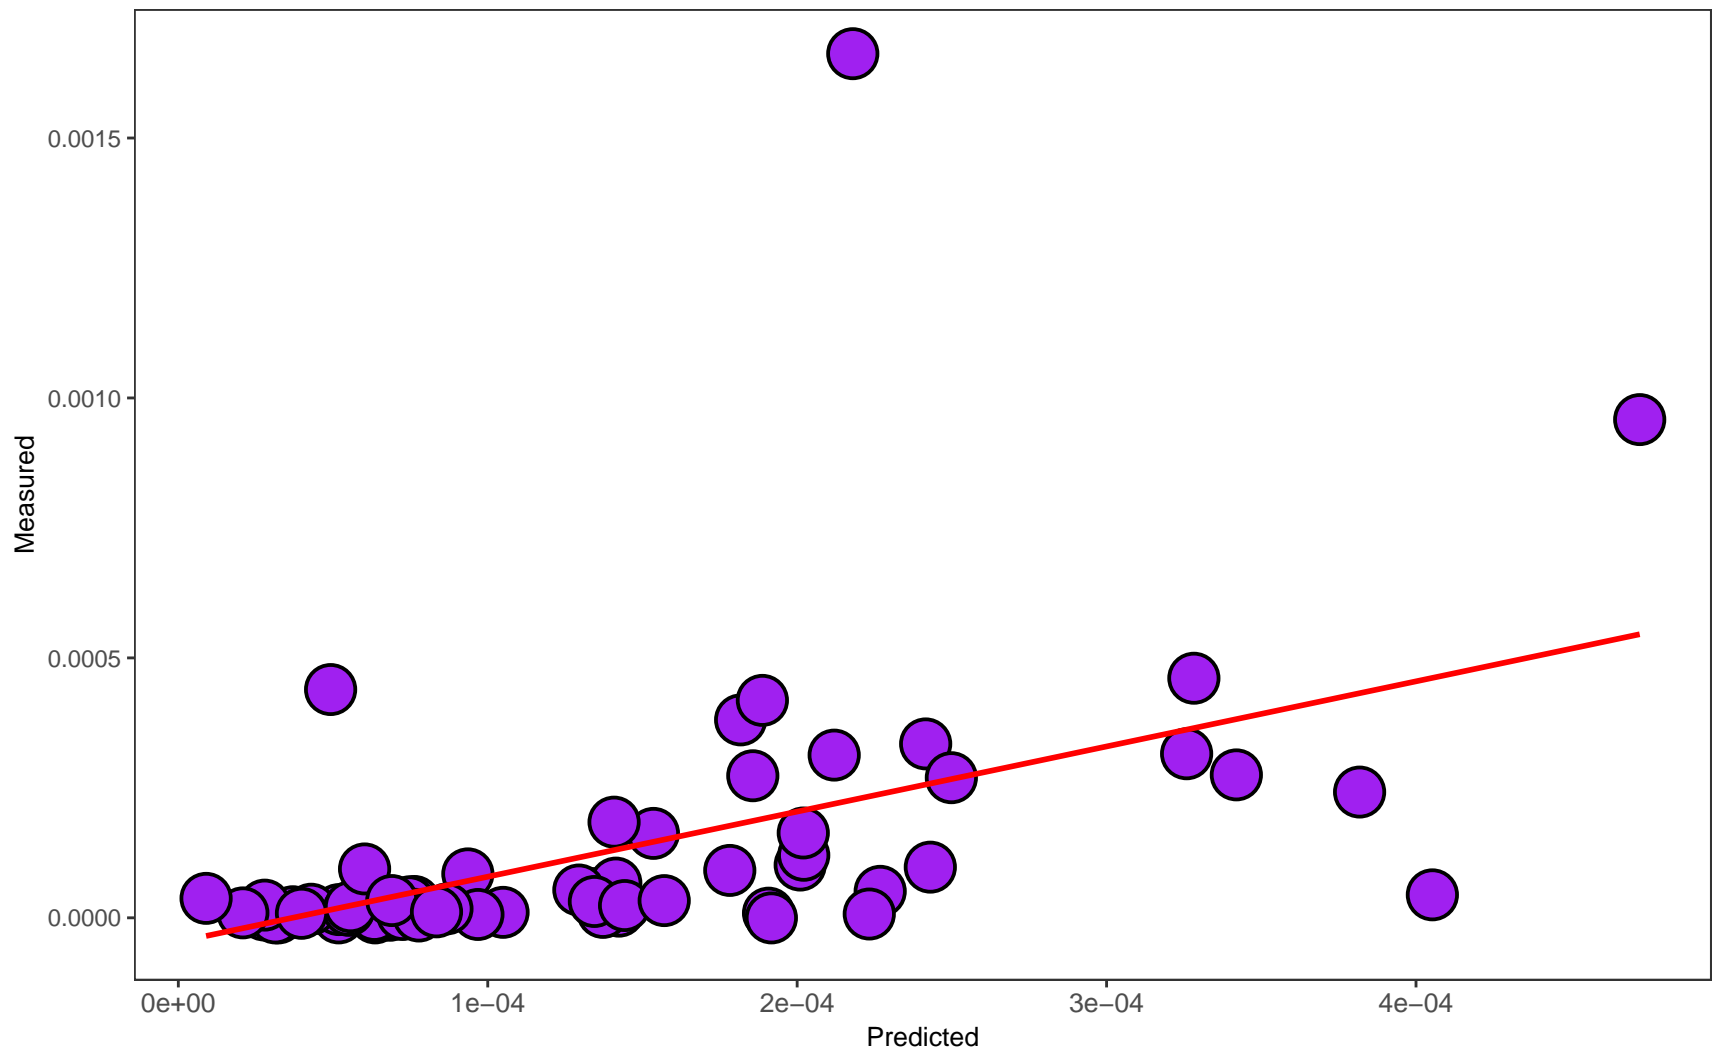

docosahexaenoic acid (C18-neg\_Cluster\_0472): Spearman 0.31

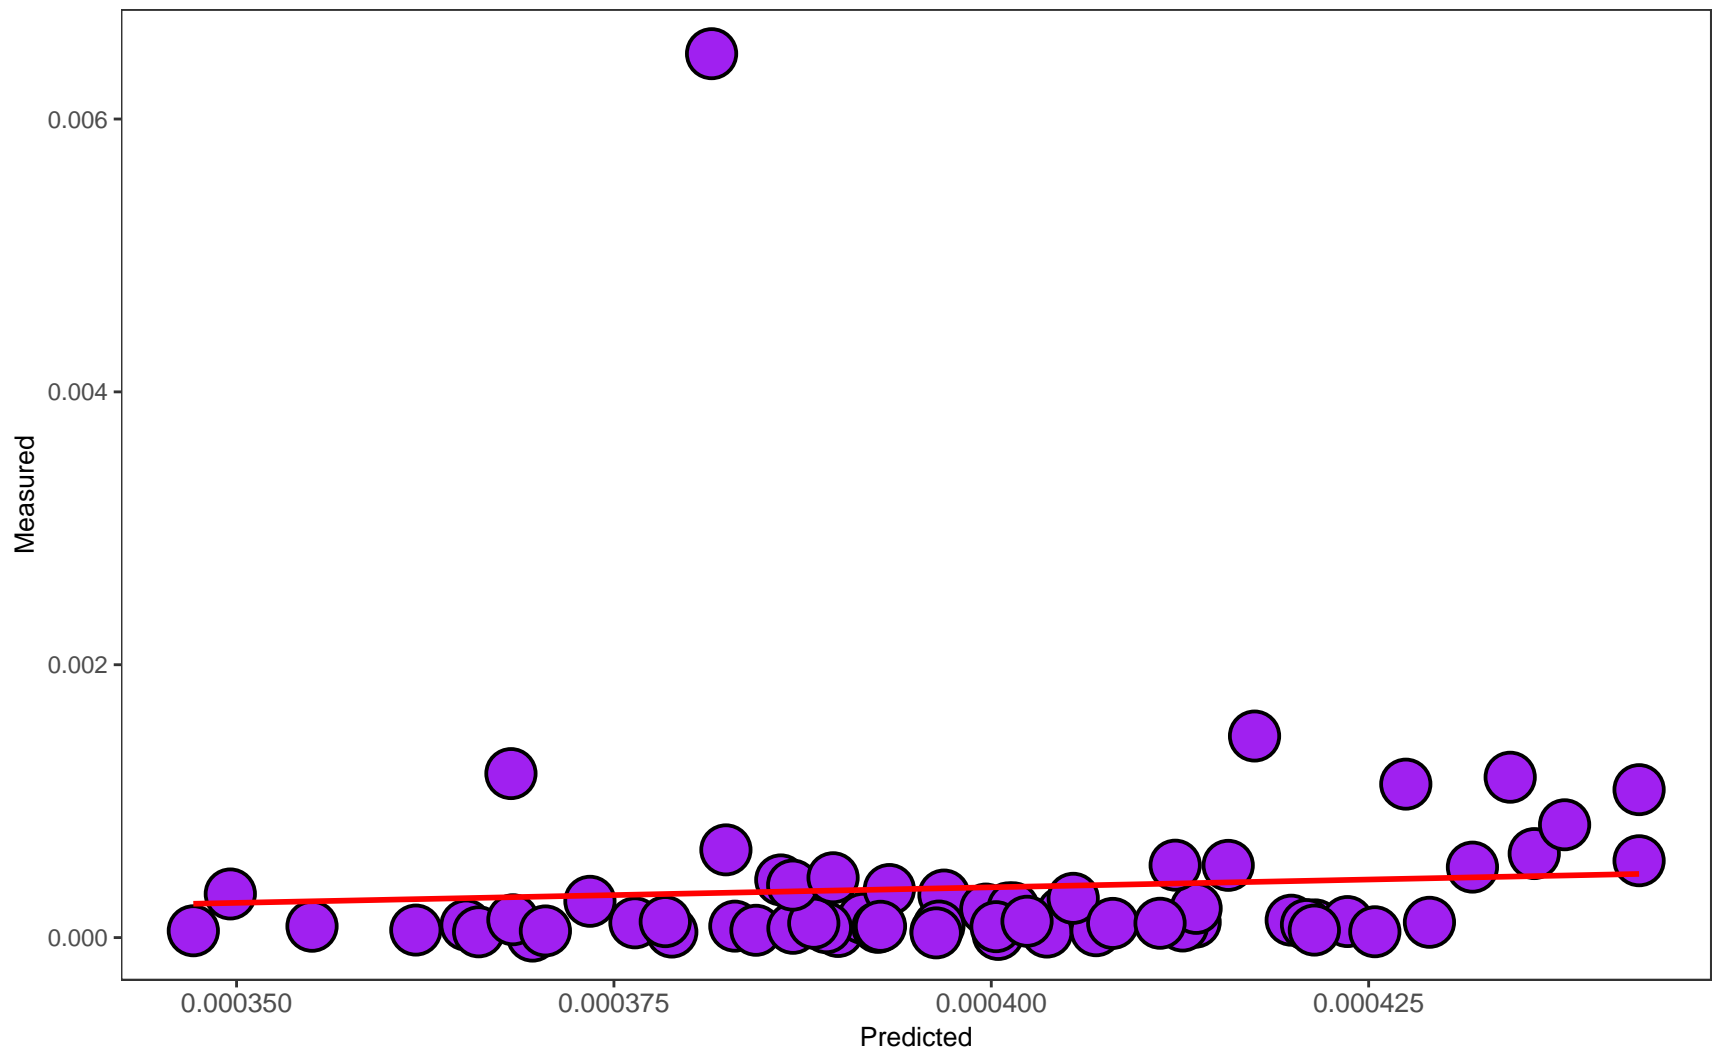

docosapentaenoic acid (C18-neg\_Cluster\_0490): Spearman 0.67

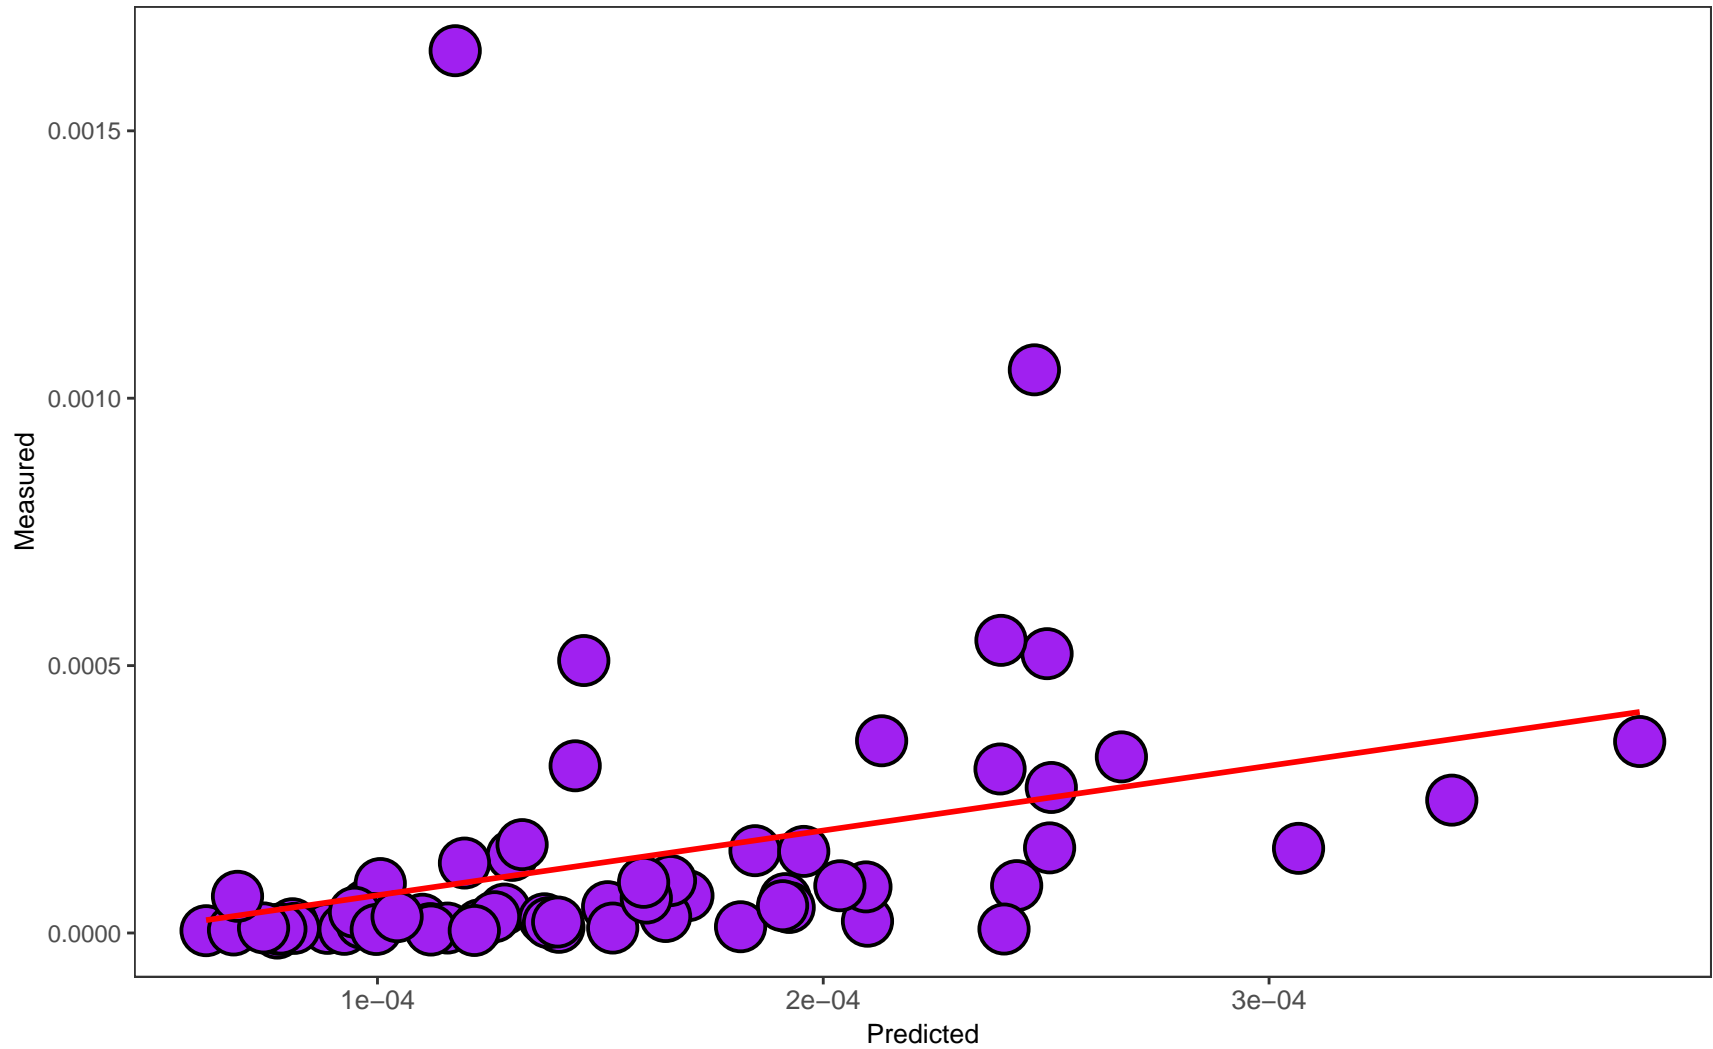



adrenic acid (C18-neg\_Cluster\_0506): Spearman 0.55

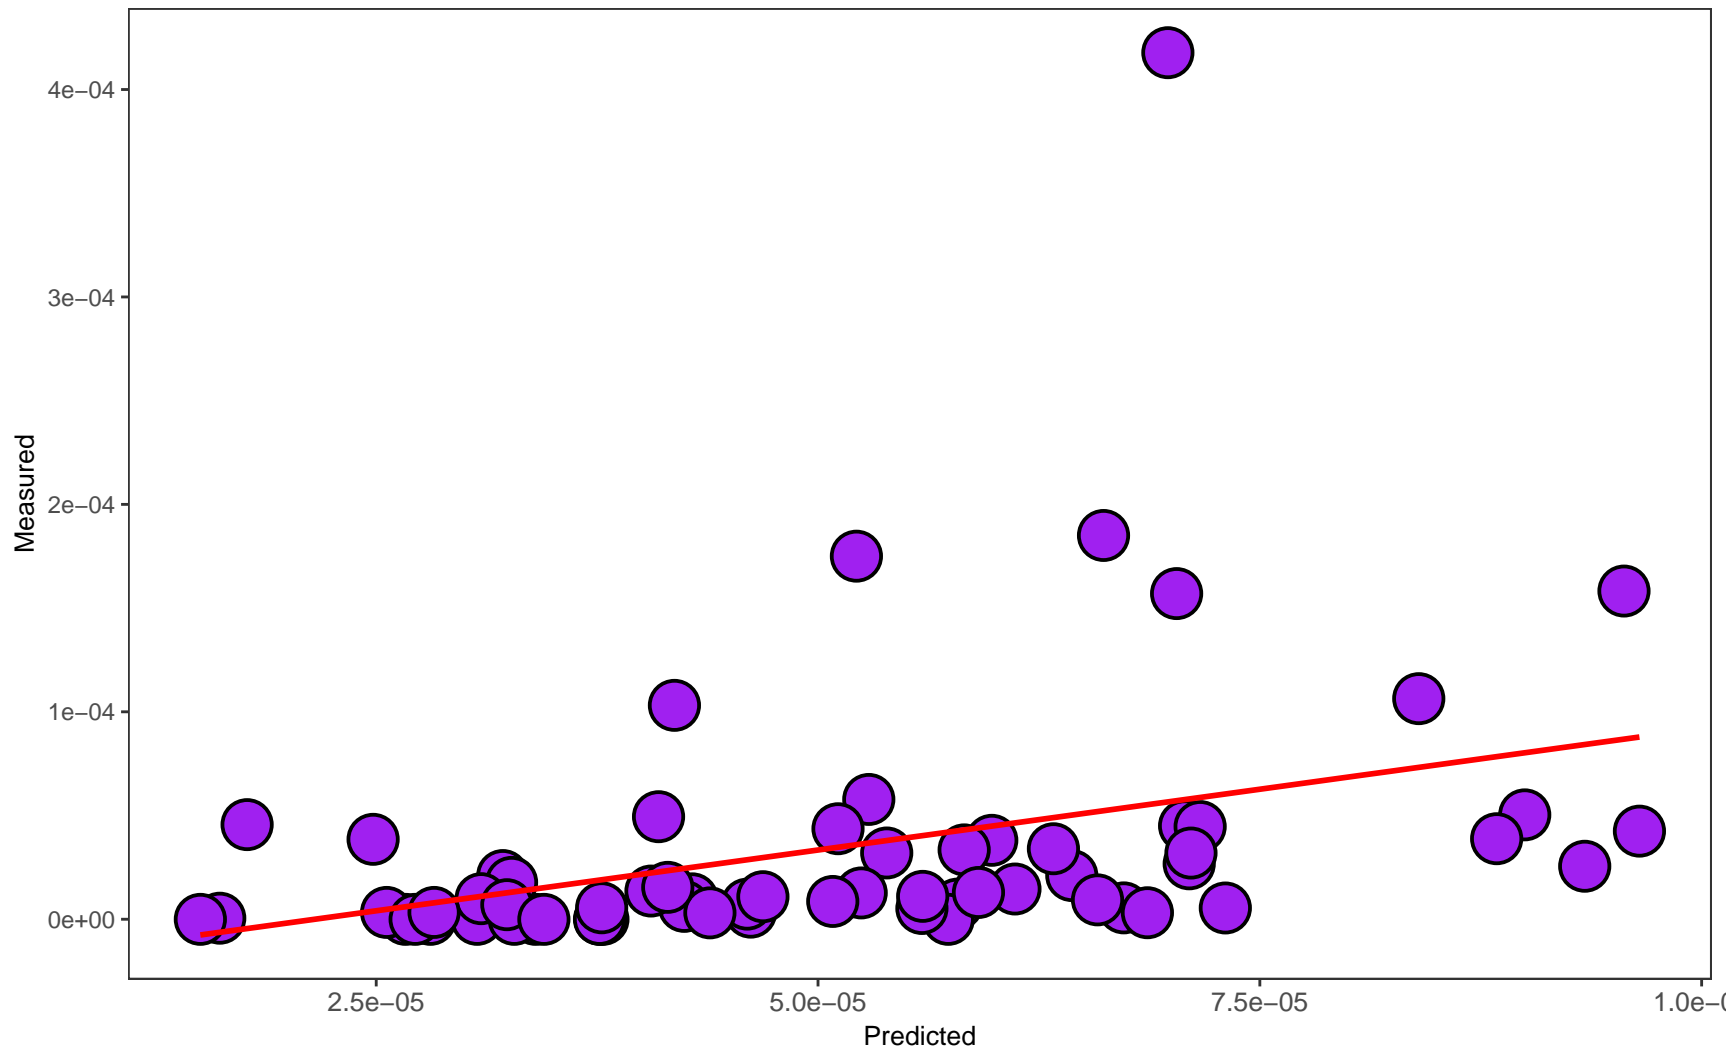

lithocholic acid (C18-neg\_Cluster\_0731): Spearman 0.5

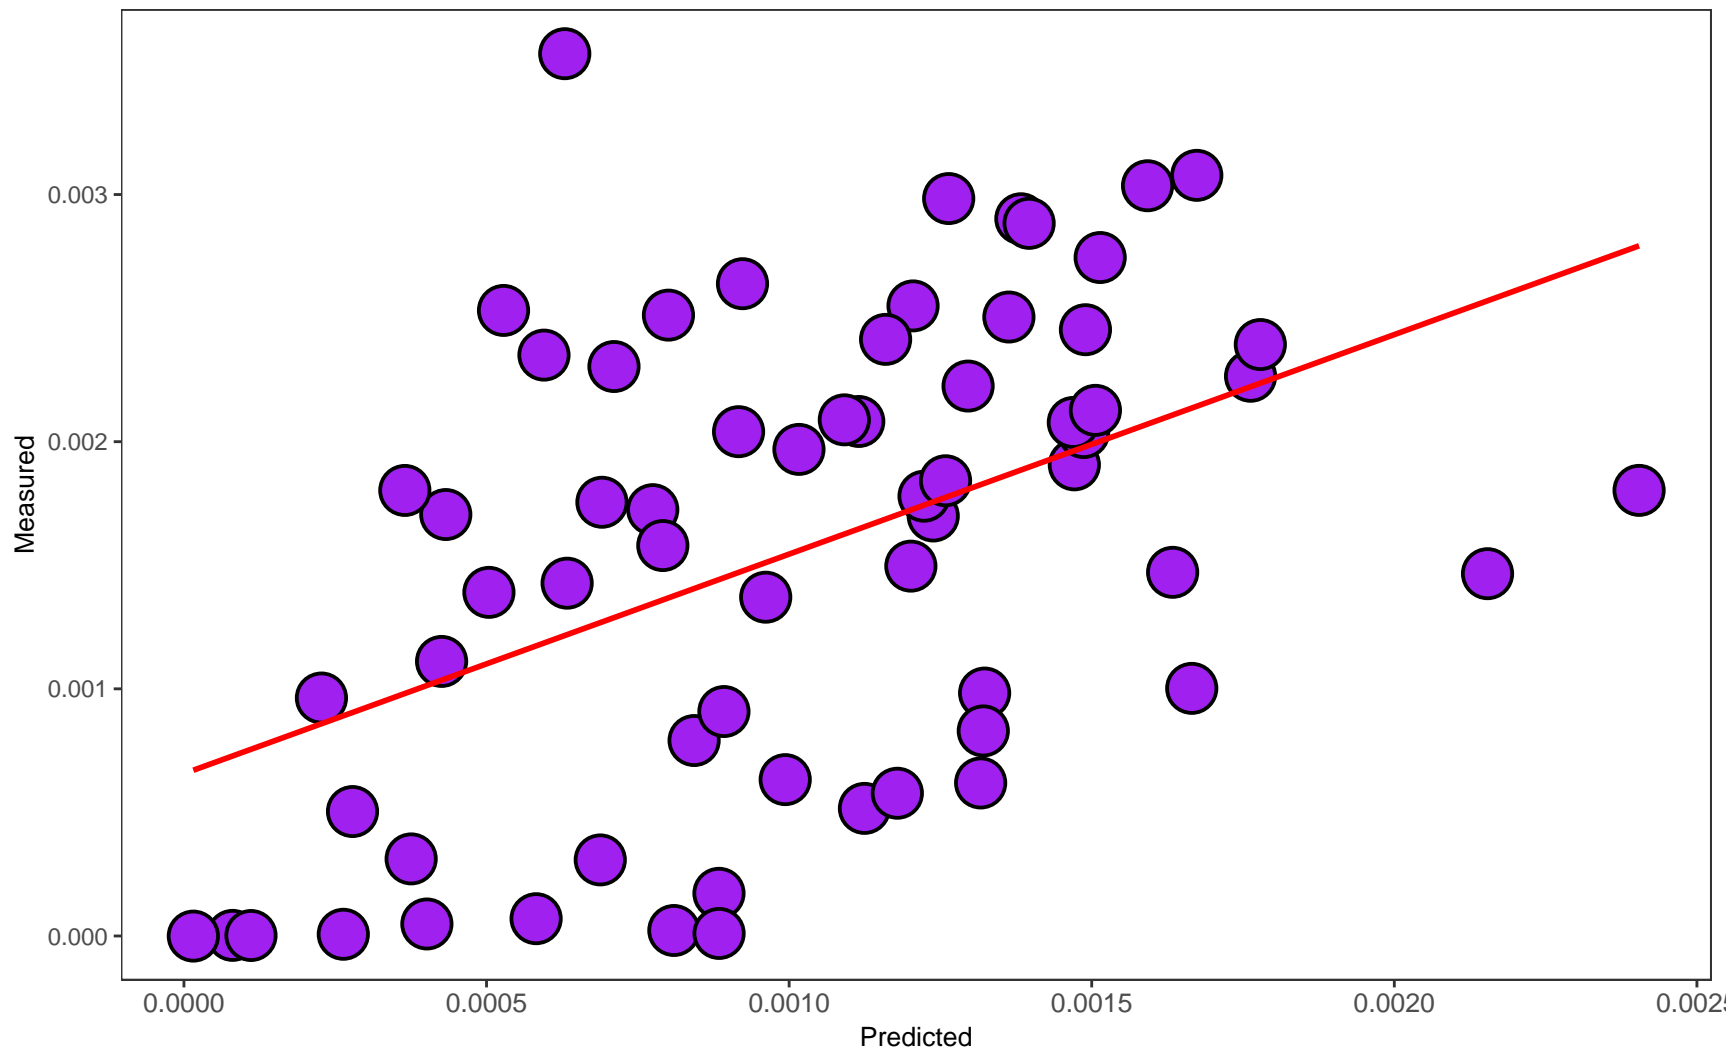

chenodeoxycholate (C18-neg\_Cluster\_0832): Spearman 0.57

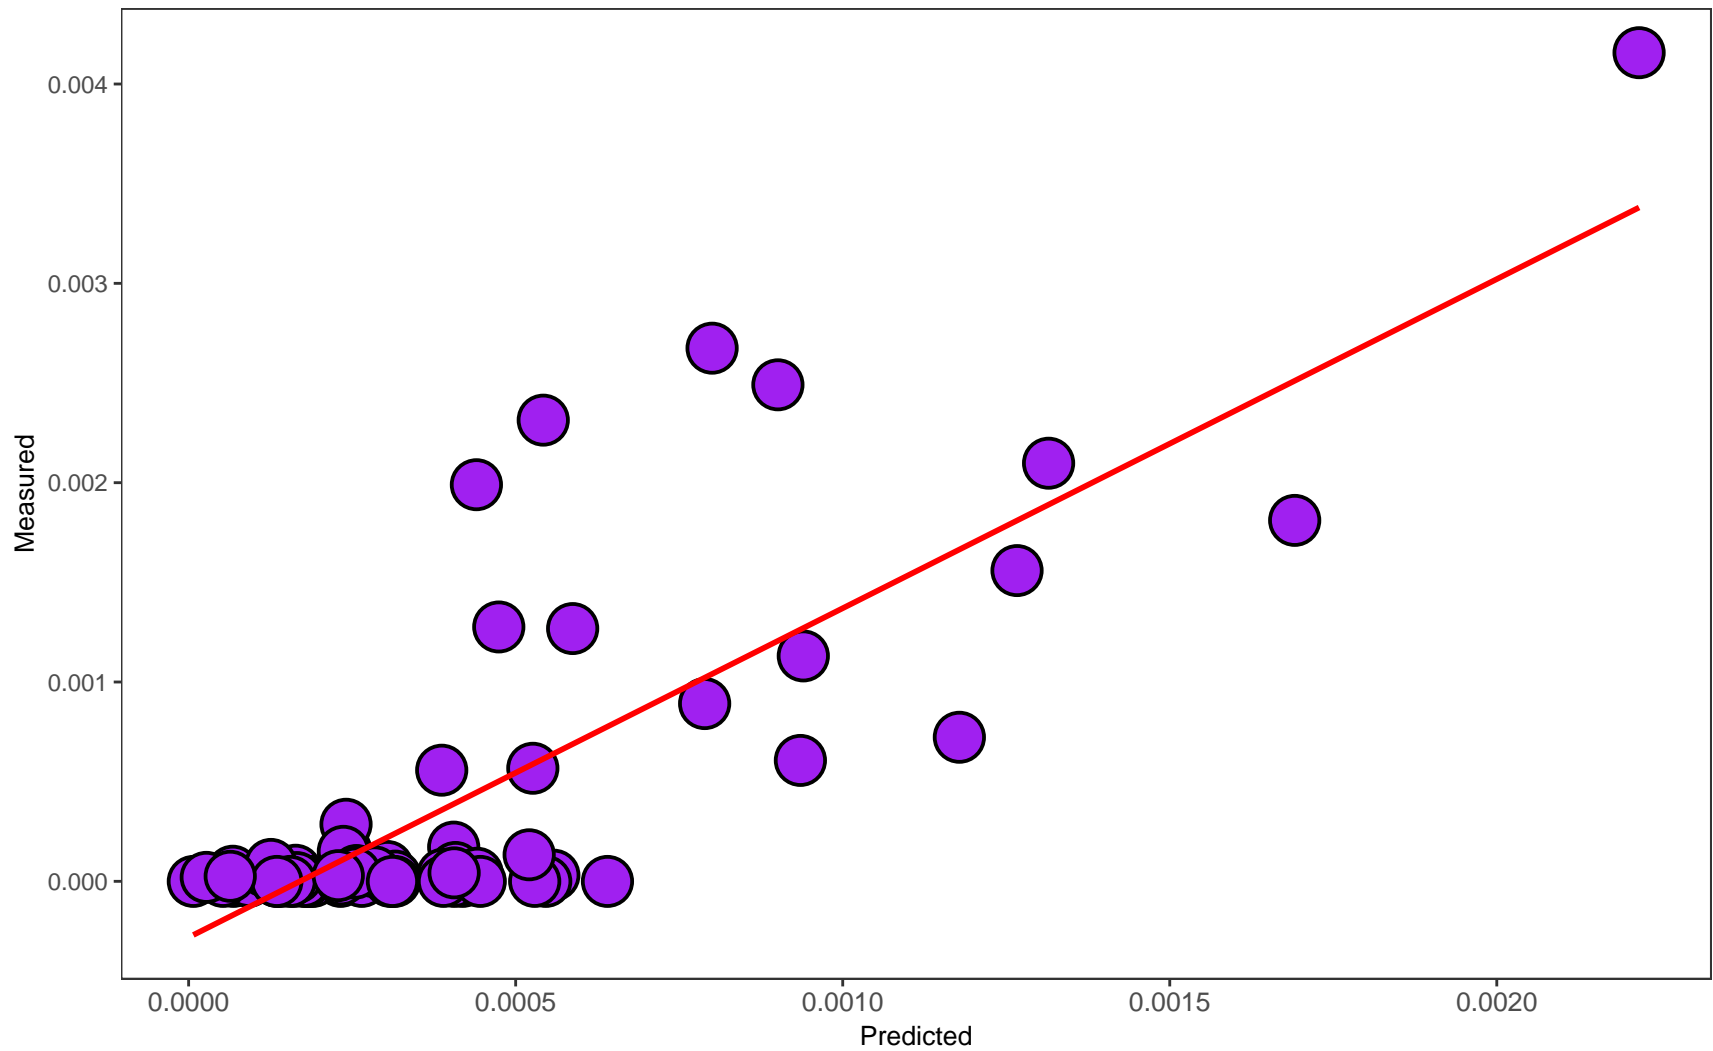

deoxycholic acid (C18-neg\_Cluster\_0833): Spearman 0.51

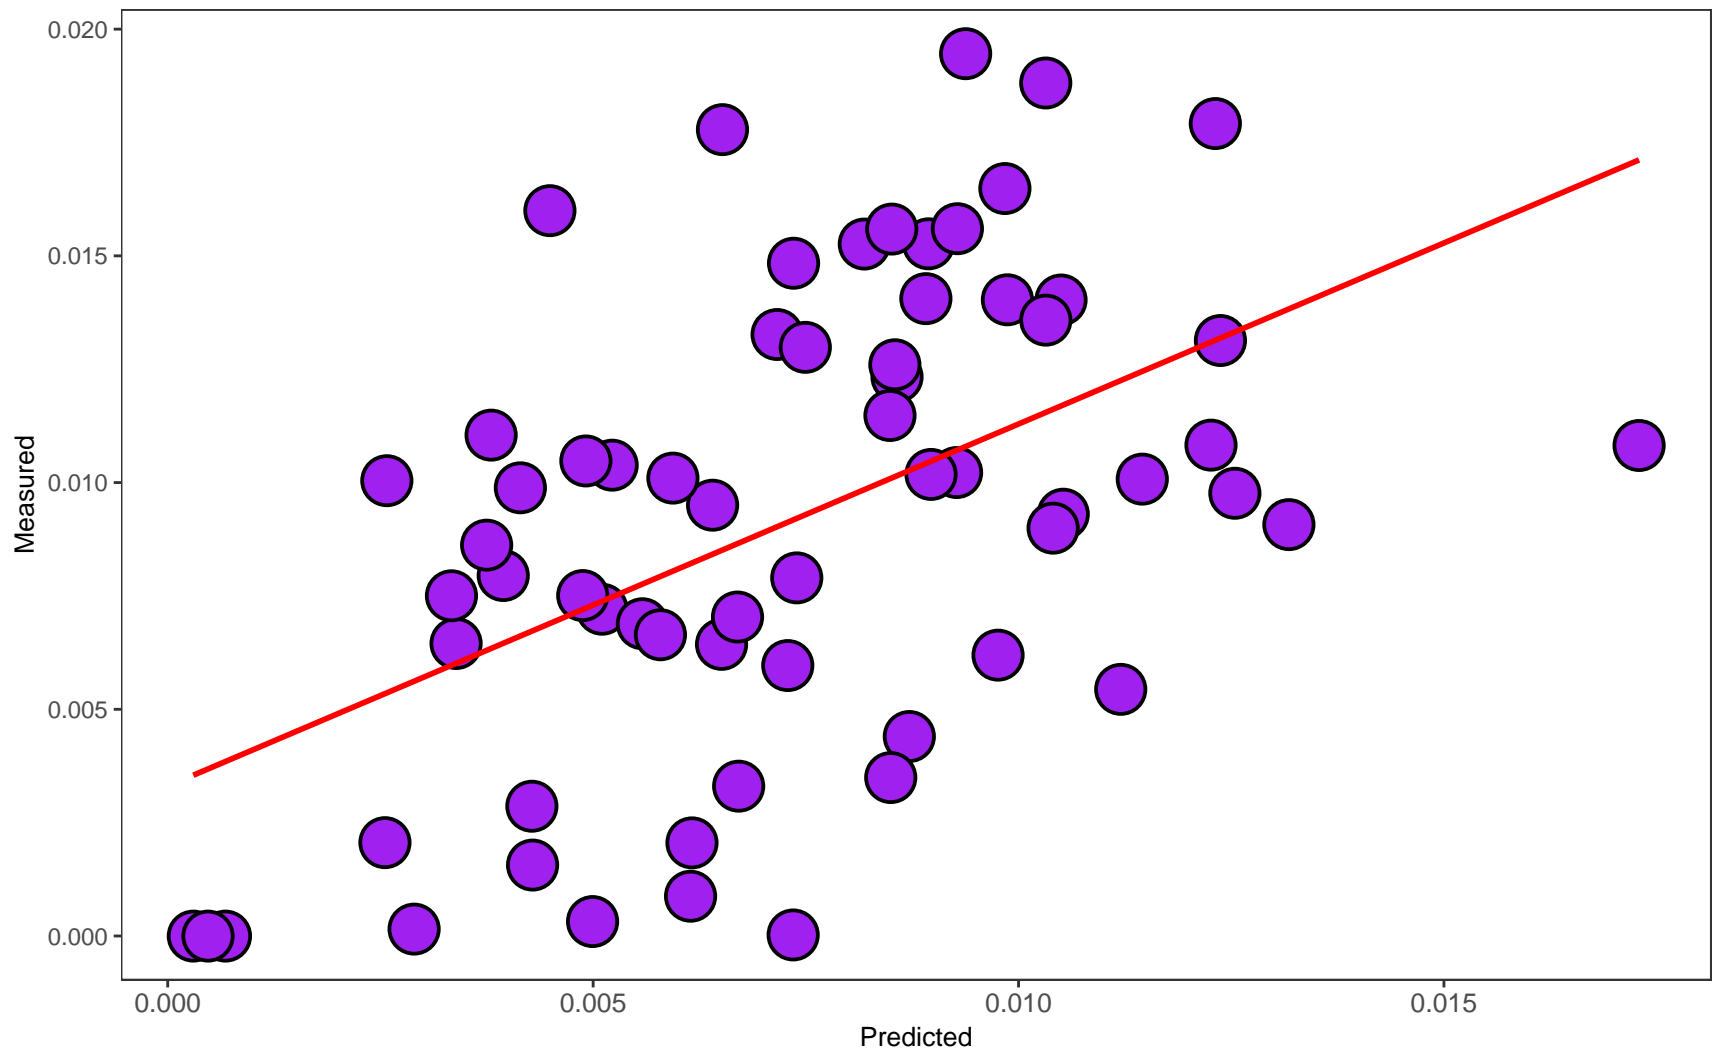

docosapentaenoic acid (C18-neg\_Cluster\_0863): Spearman 0.62

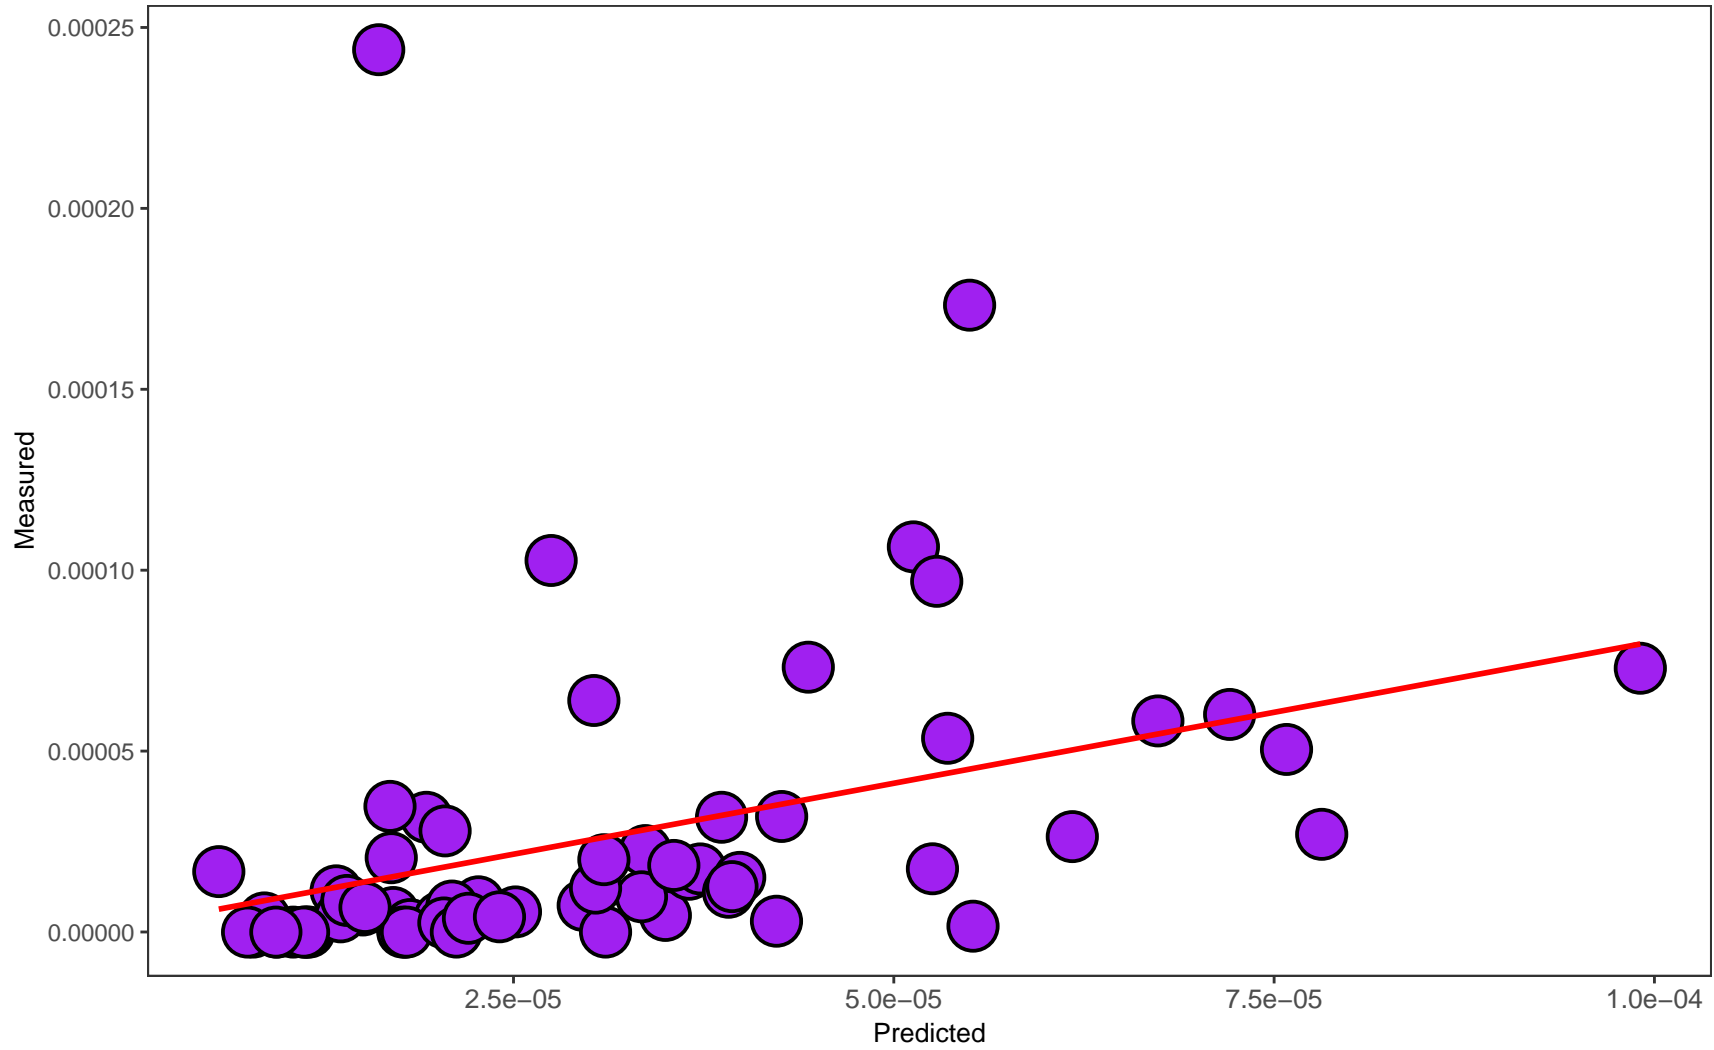

ketodeoxycholate (C18-neg\_Cluster\_0900): Spearman 0.42

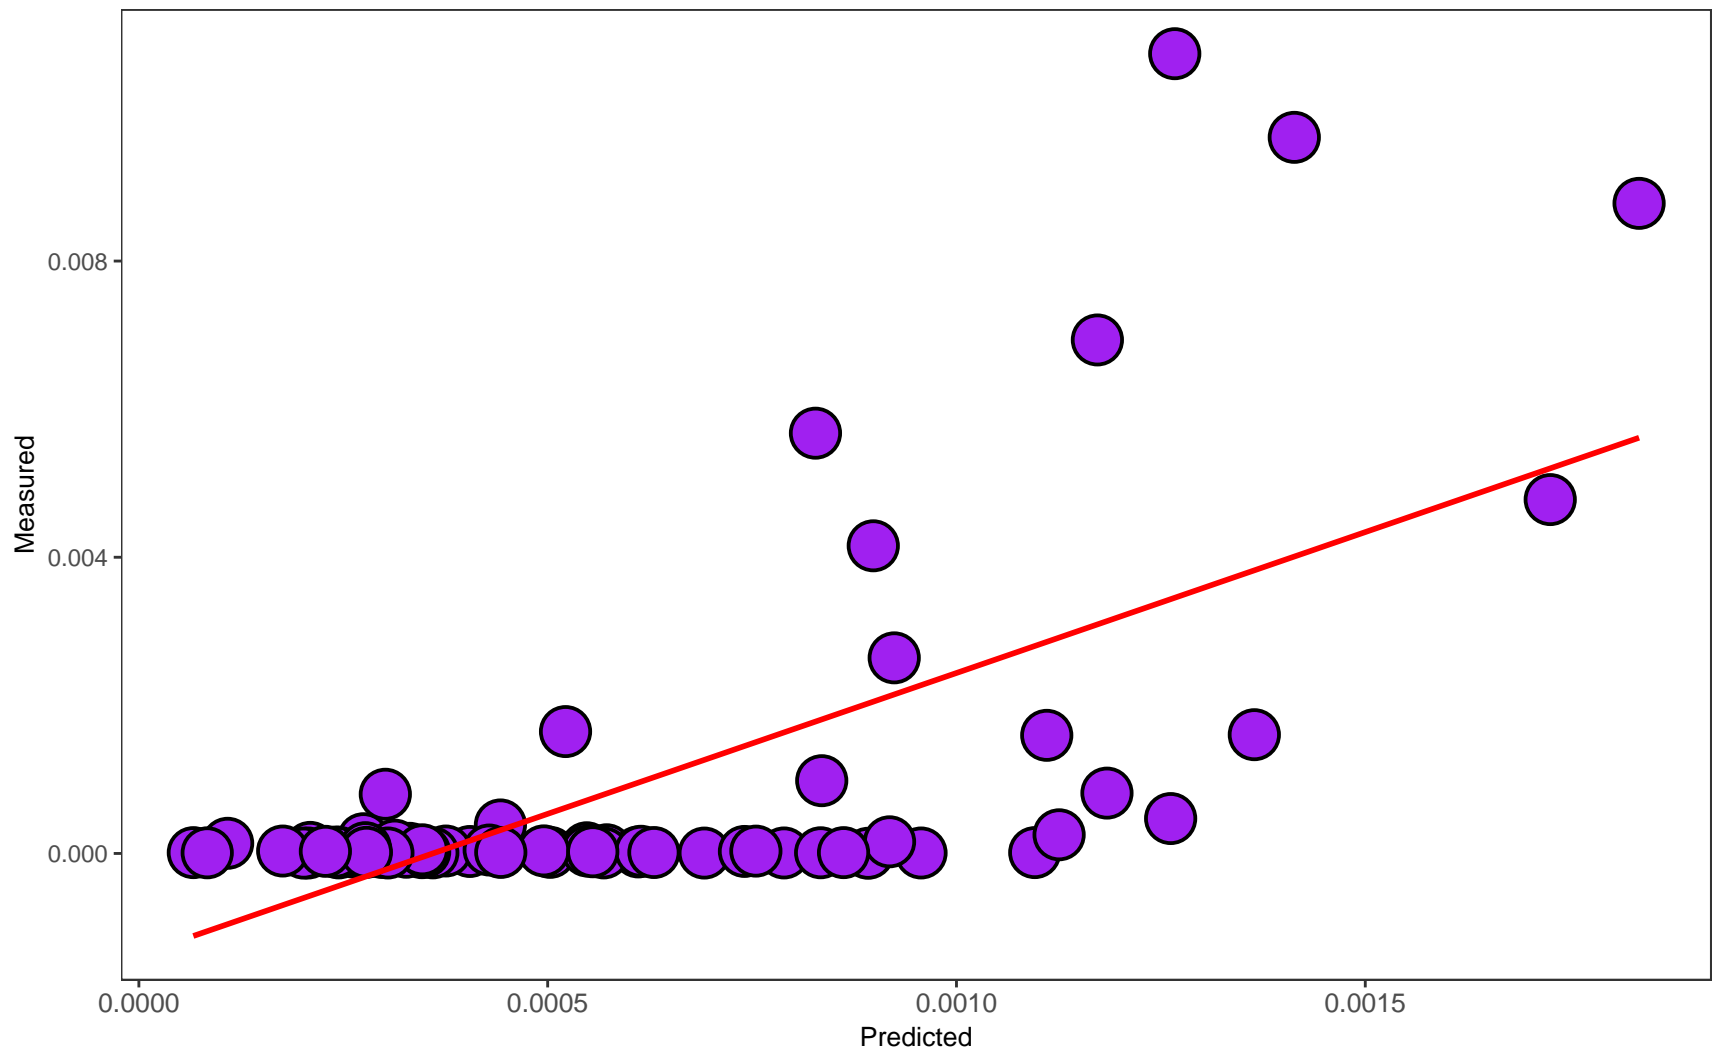

alpha-muricholate (C18-neg\_Cluster\_0927): Spearman 0.58

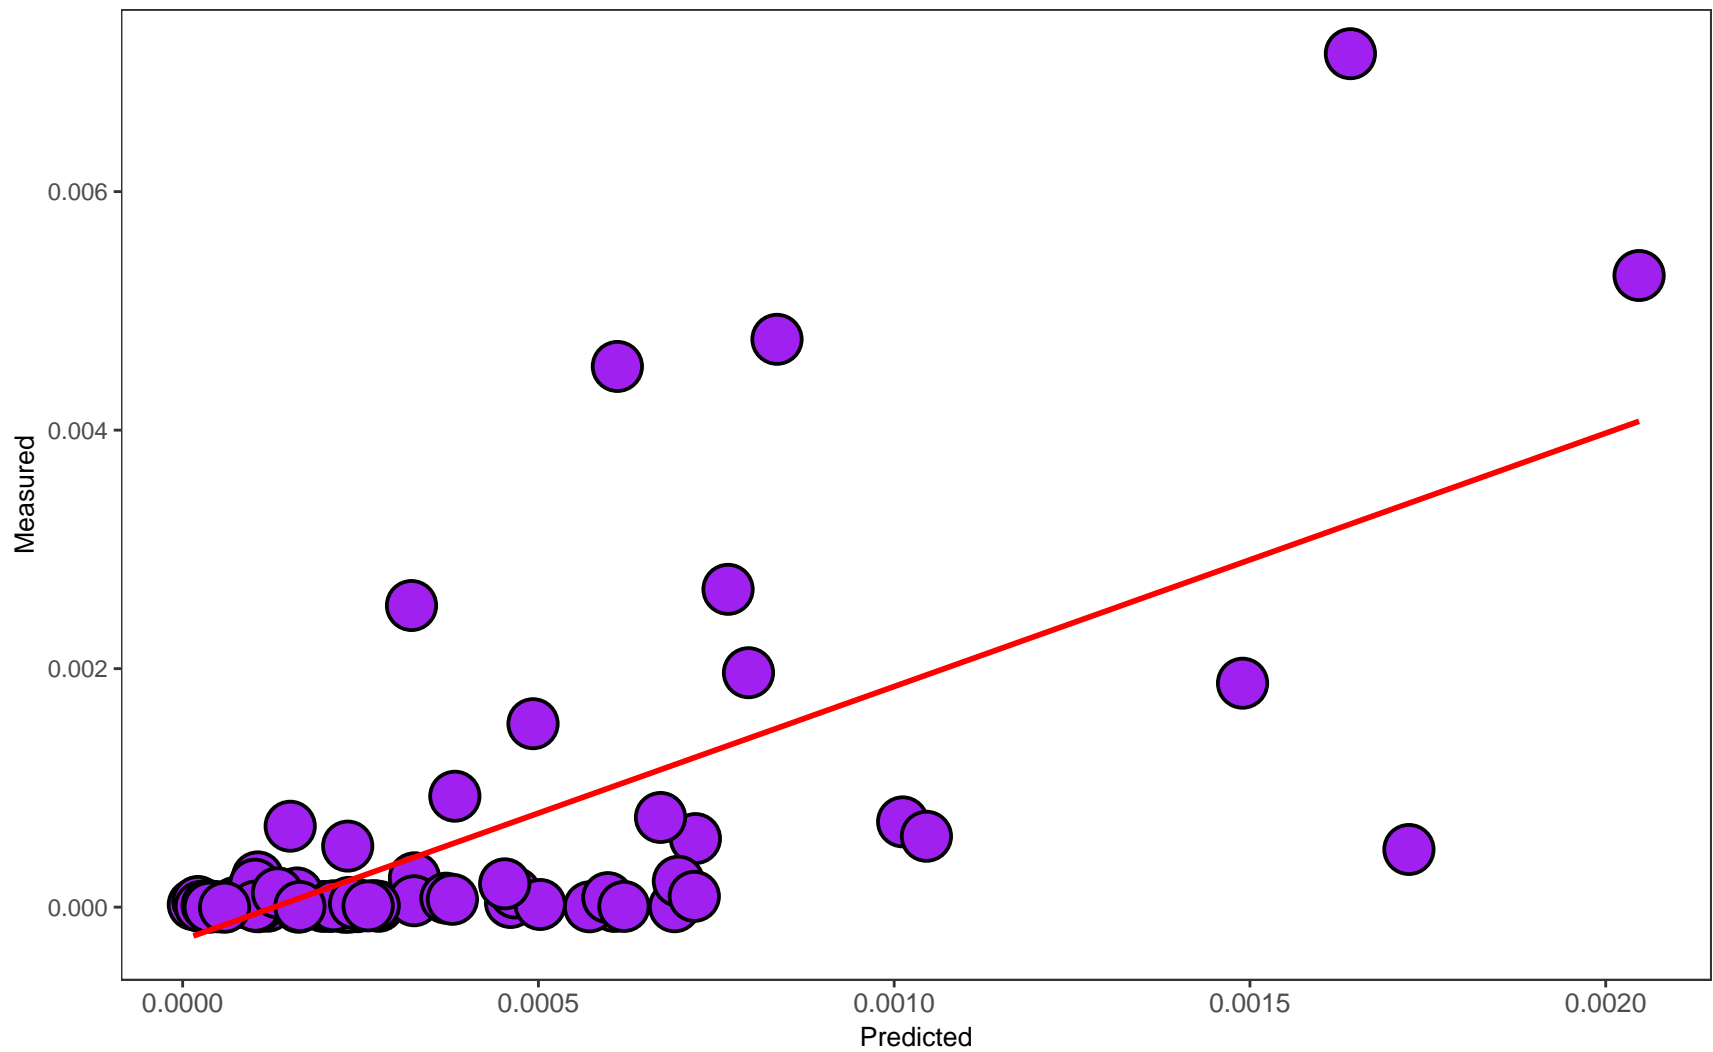

cholate (C18-neg\_Cluster\_0930): Spearman 0.49

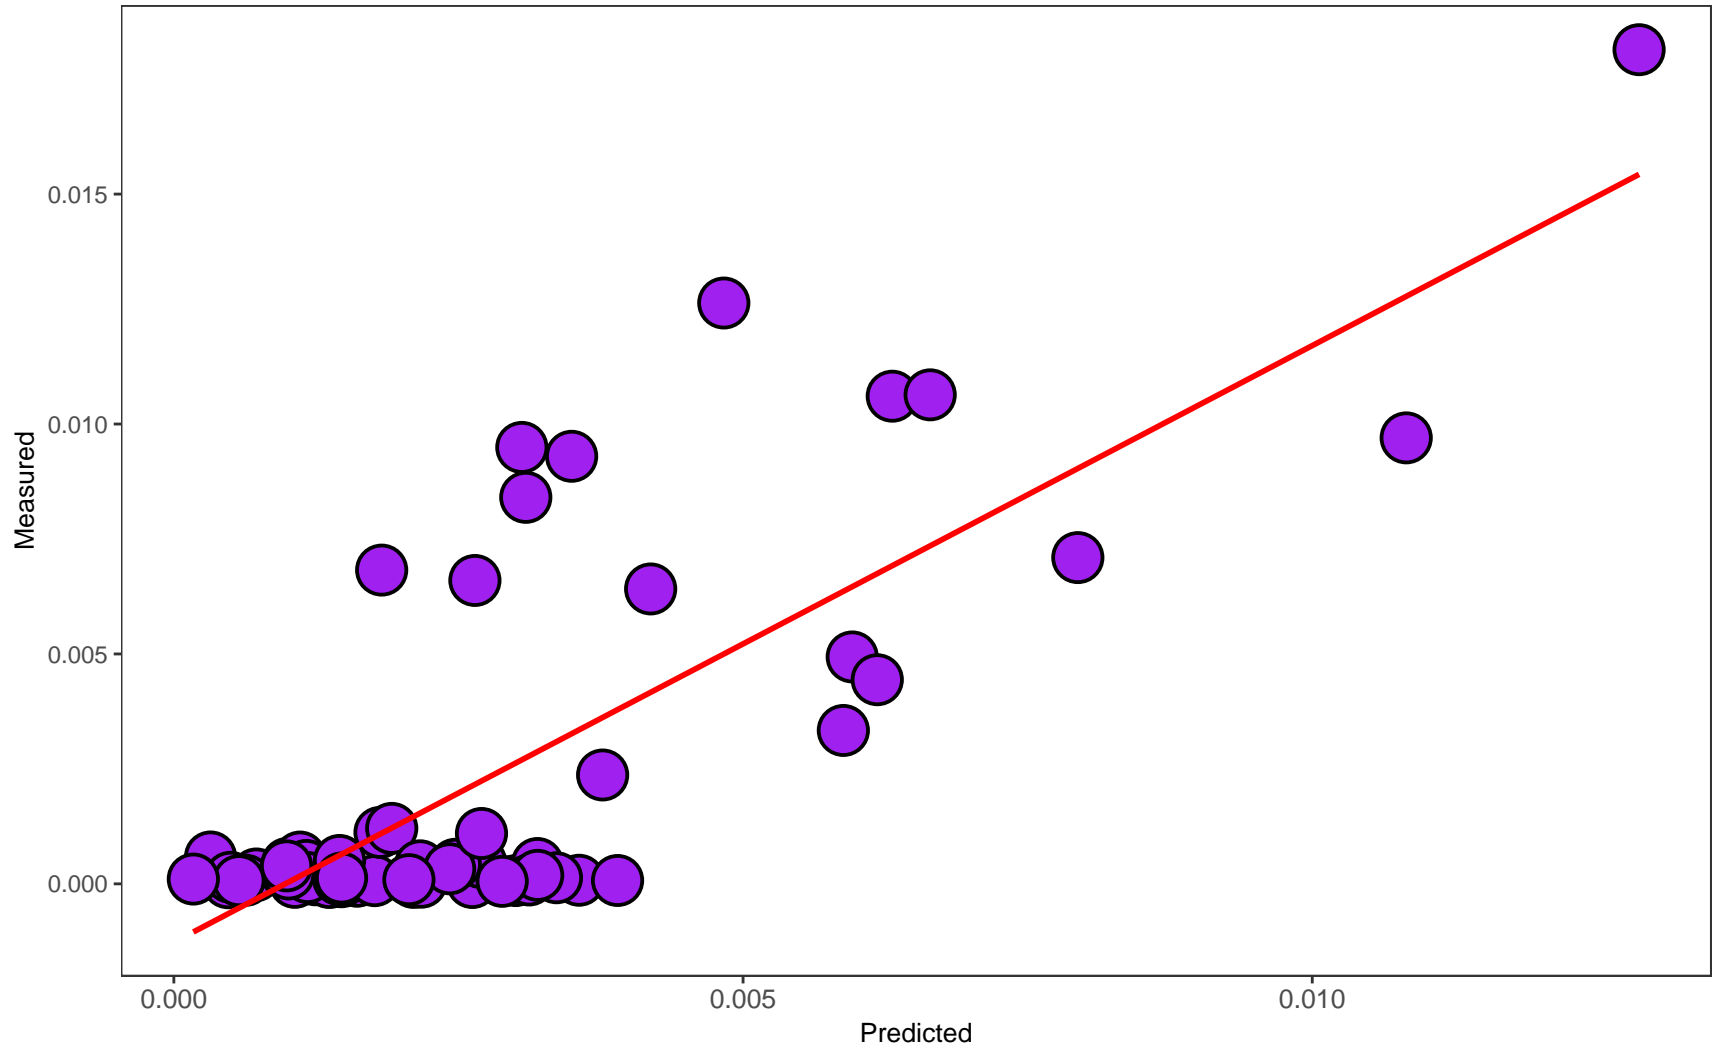





chenodeoxycholate (C18-neg\_Cluster\_1060): Spearman 0.67

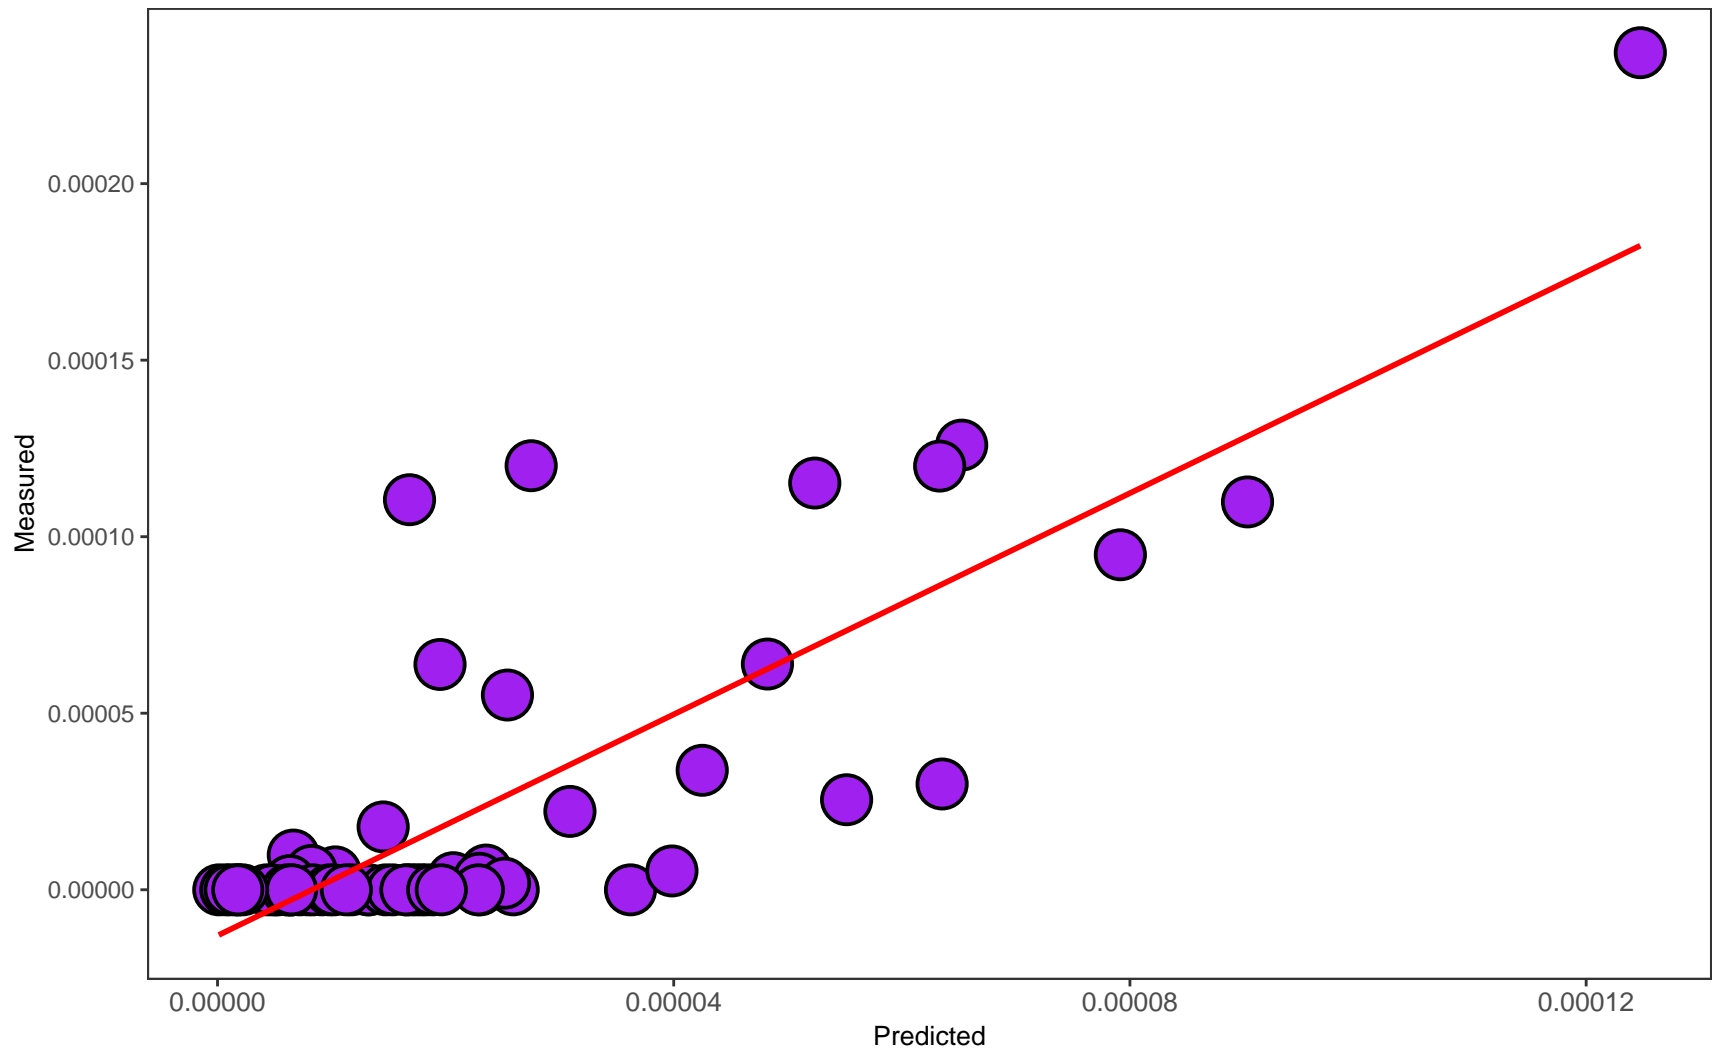

chenodeoxycholate (C18-neg\_Cluster\_1129): Spearman 0.55

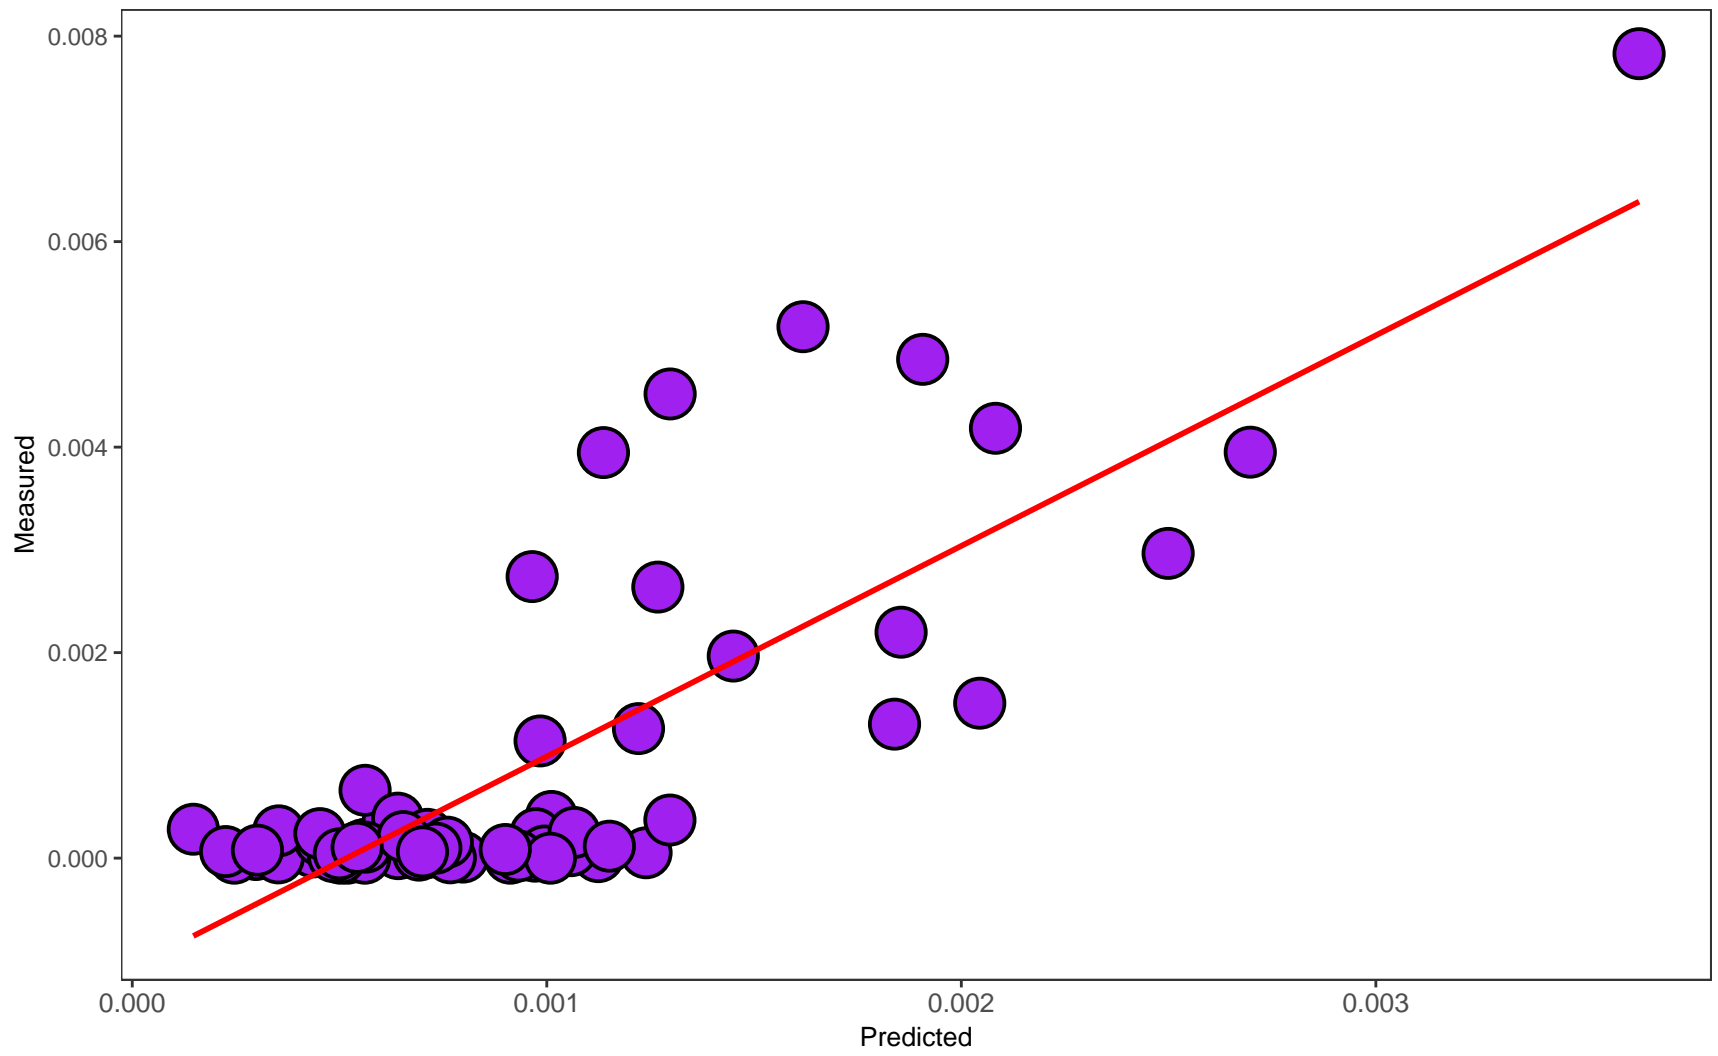



cholate (C18-neg\_Cluster\_1258): Spearman 0.5

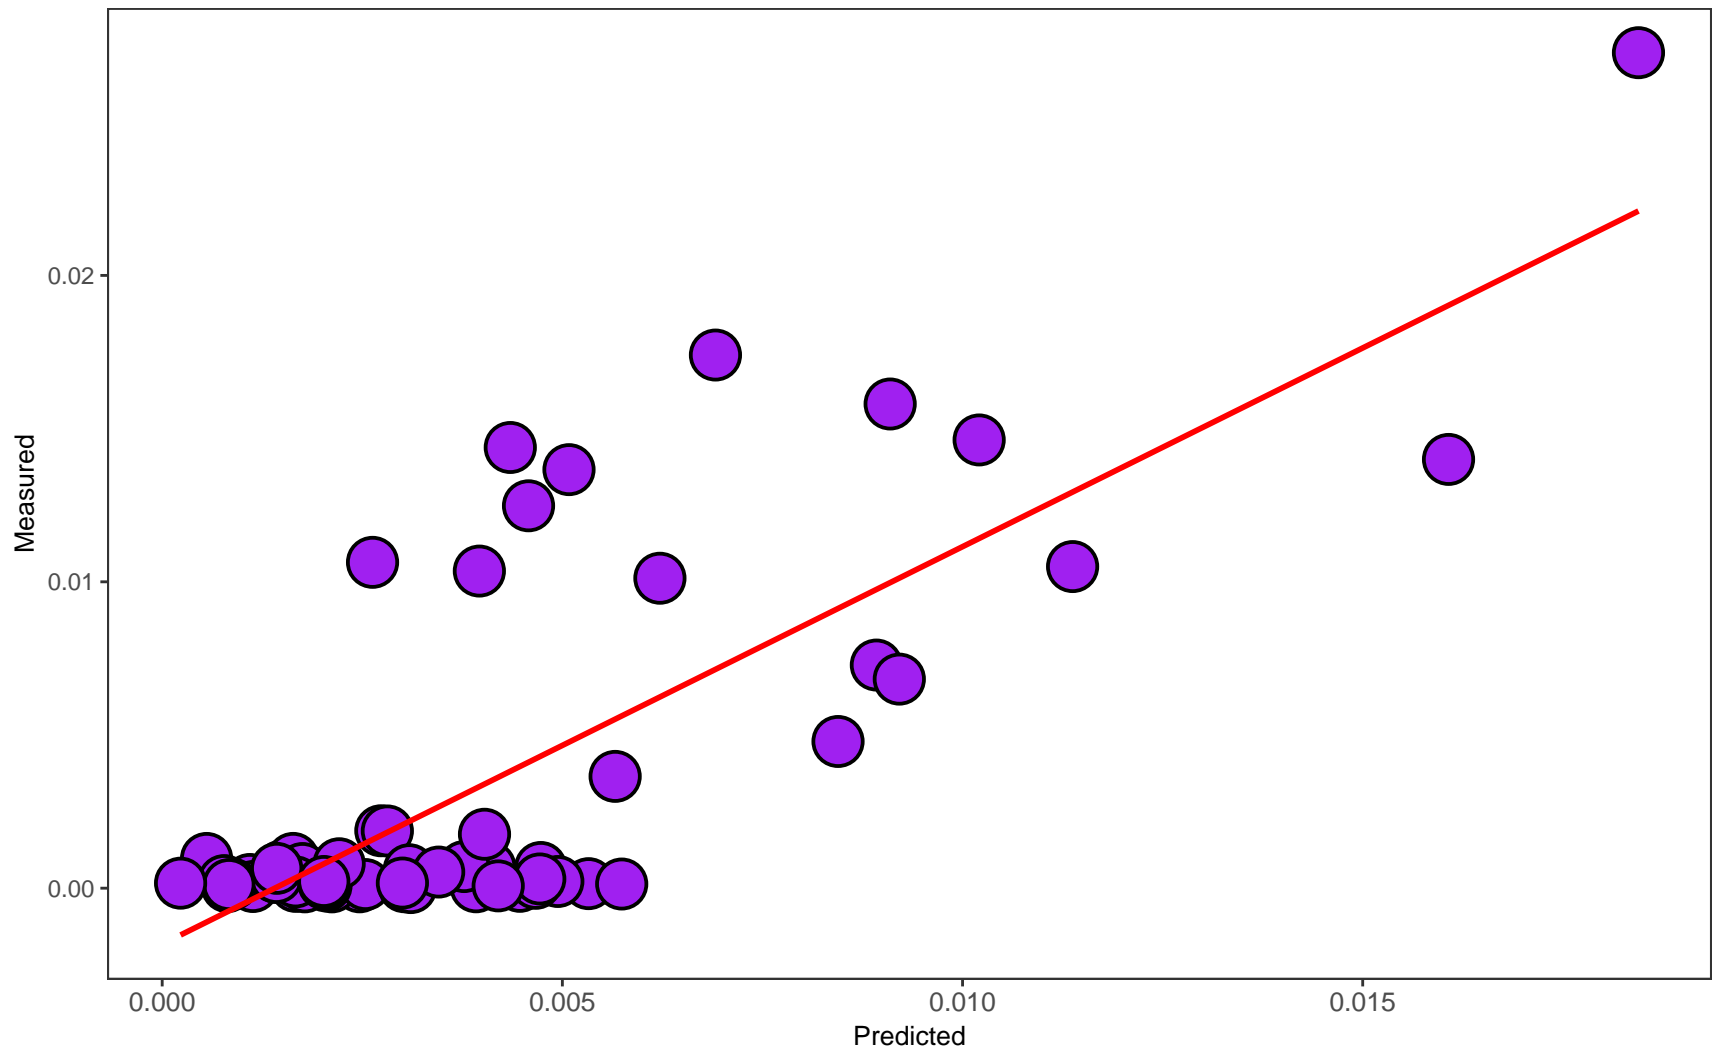

cholate (C18-neg\_Cluster\_1273): Spearman 0.41

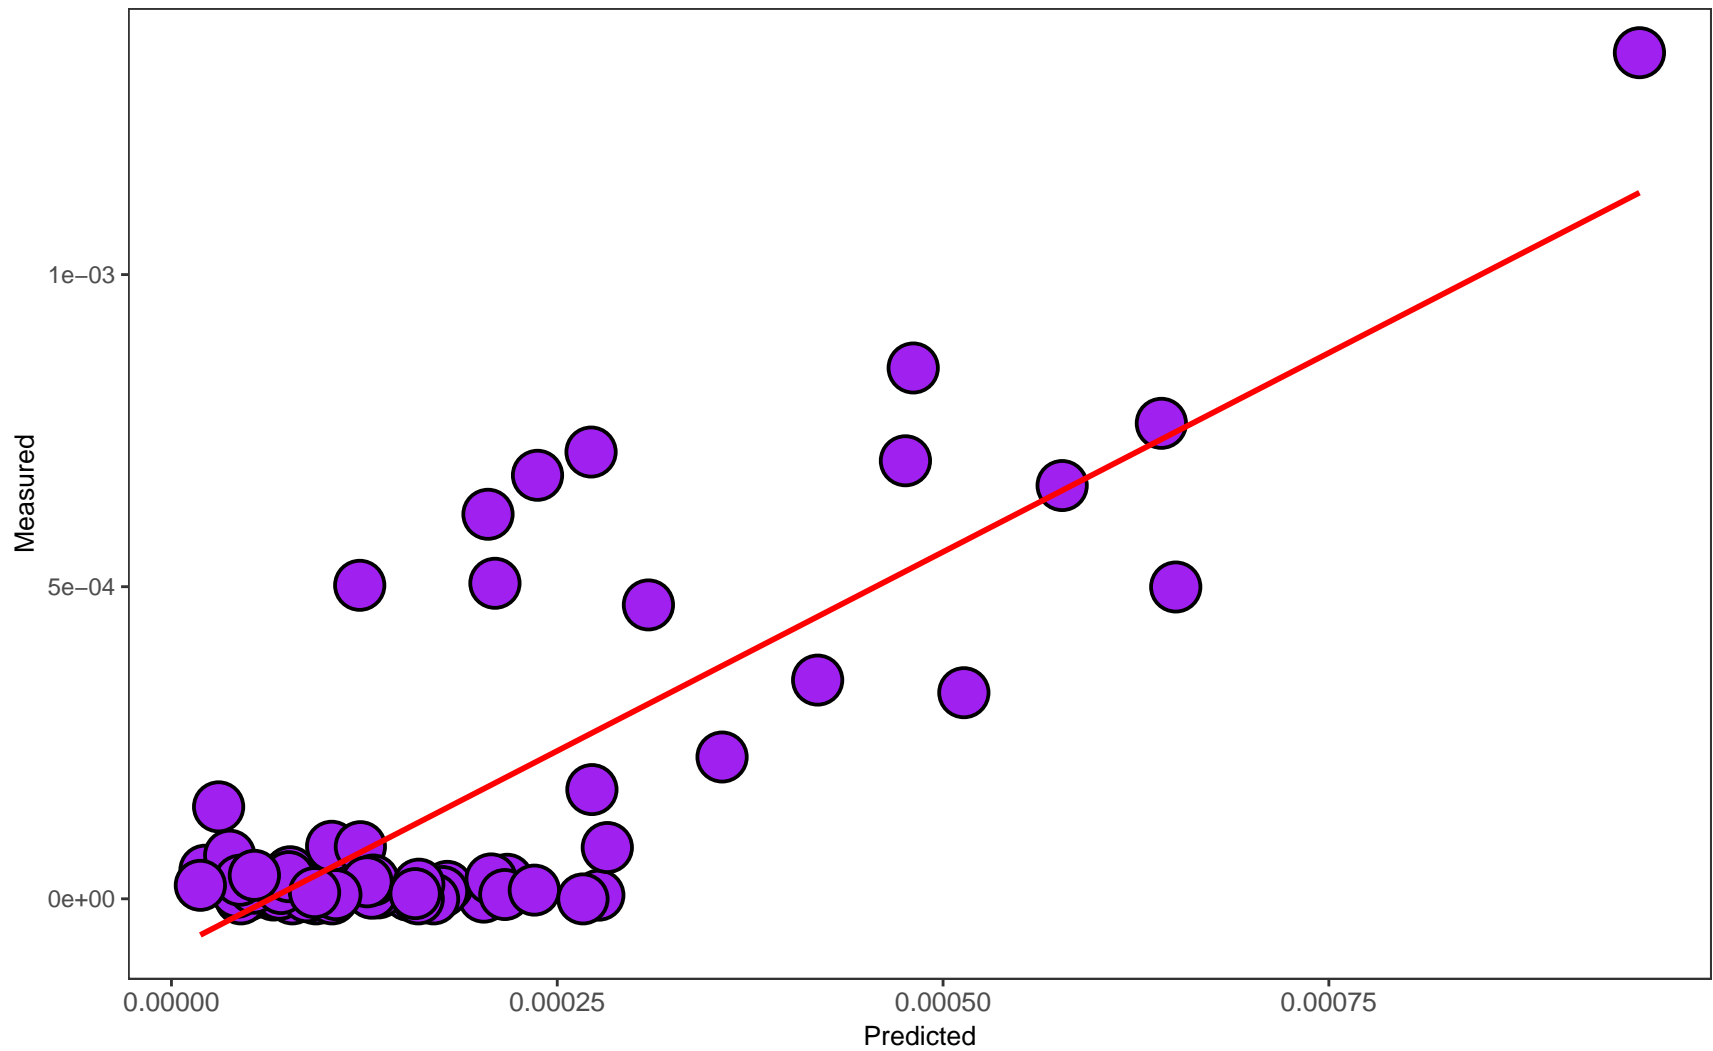

chenodeoxycholate (C18-neg\_Cluster\_1292): Spearman 0.48

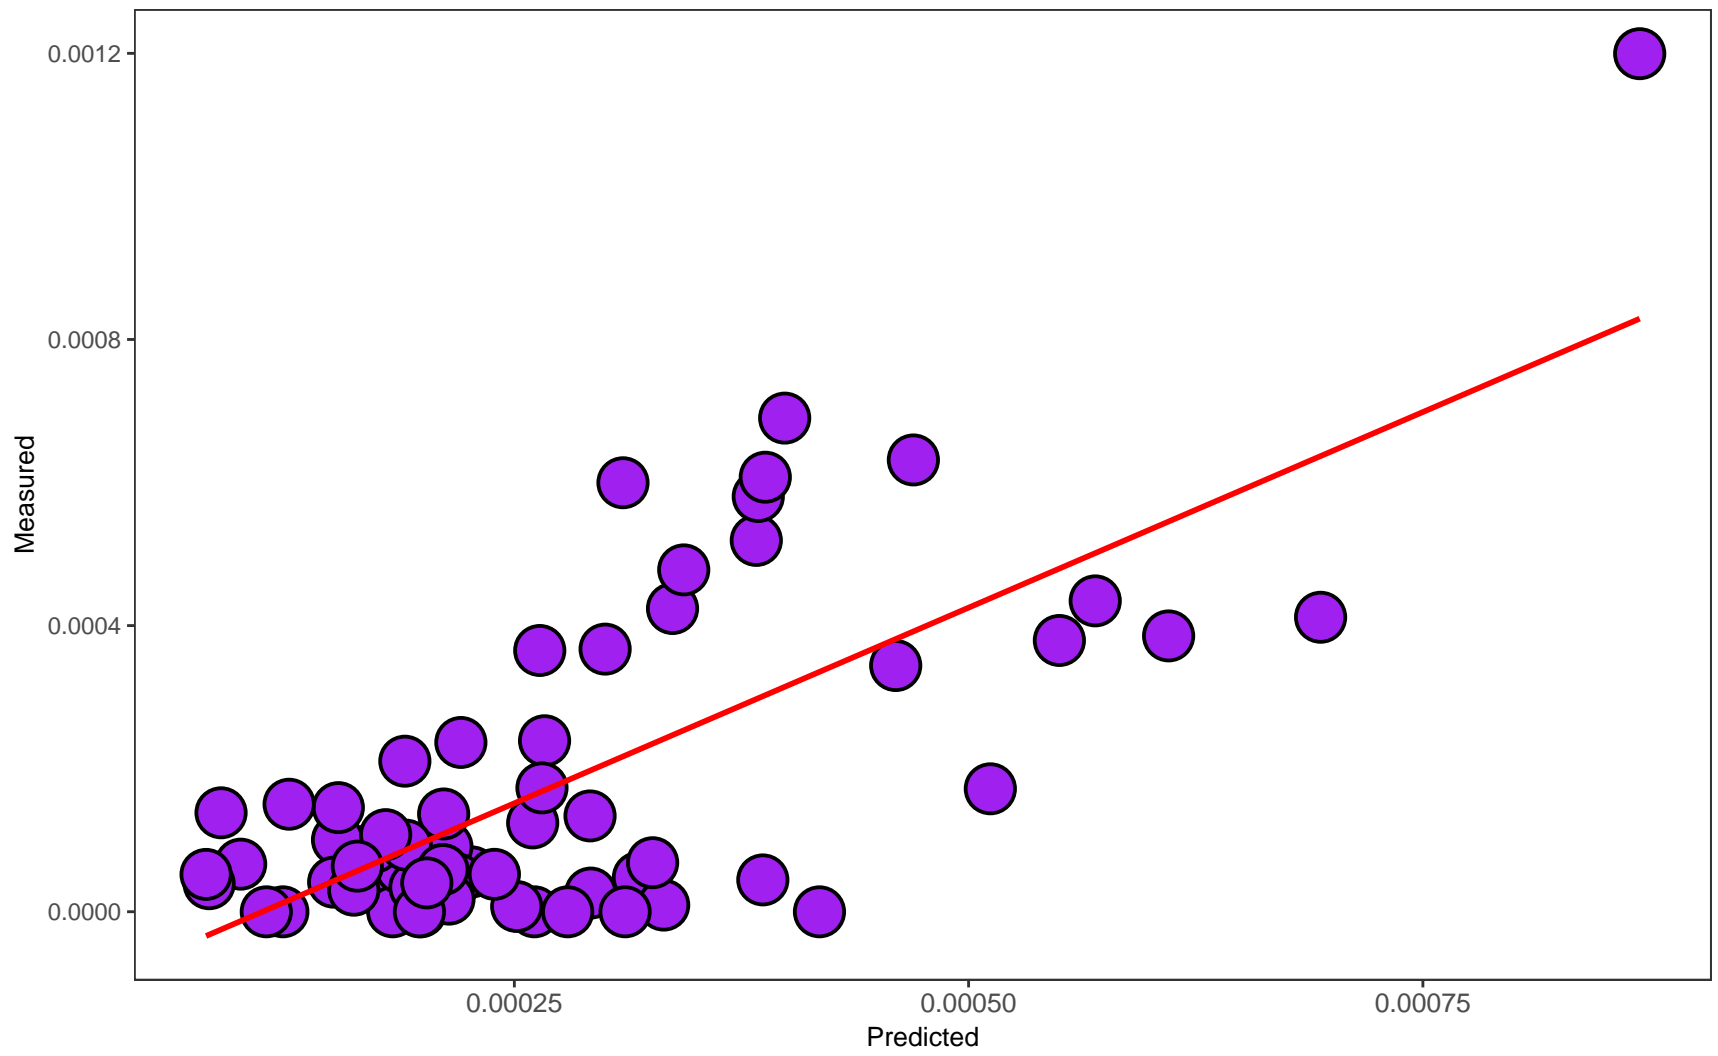

cholate (C18-neg\_Cluster\_1372): Spearman 0.46

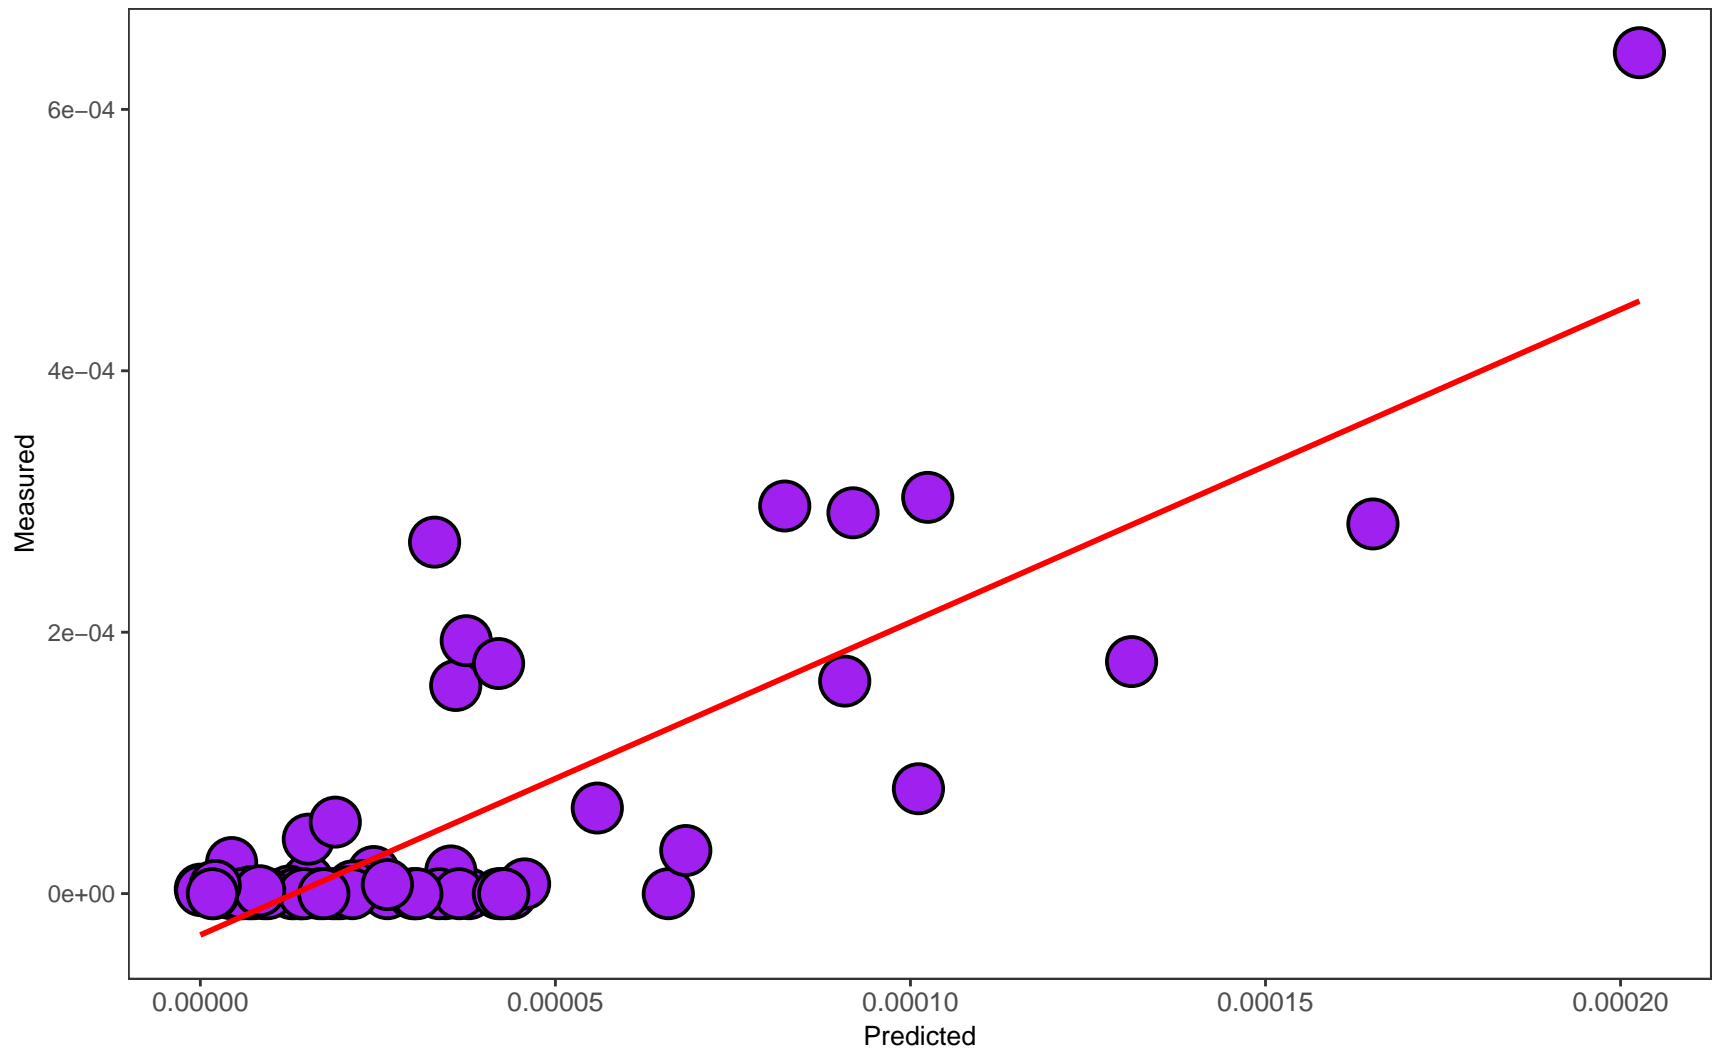



cholate (C18-neg\_Cluster\_1621): Spearman 0.48

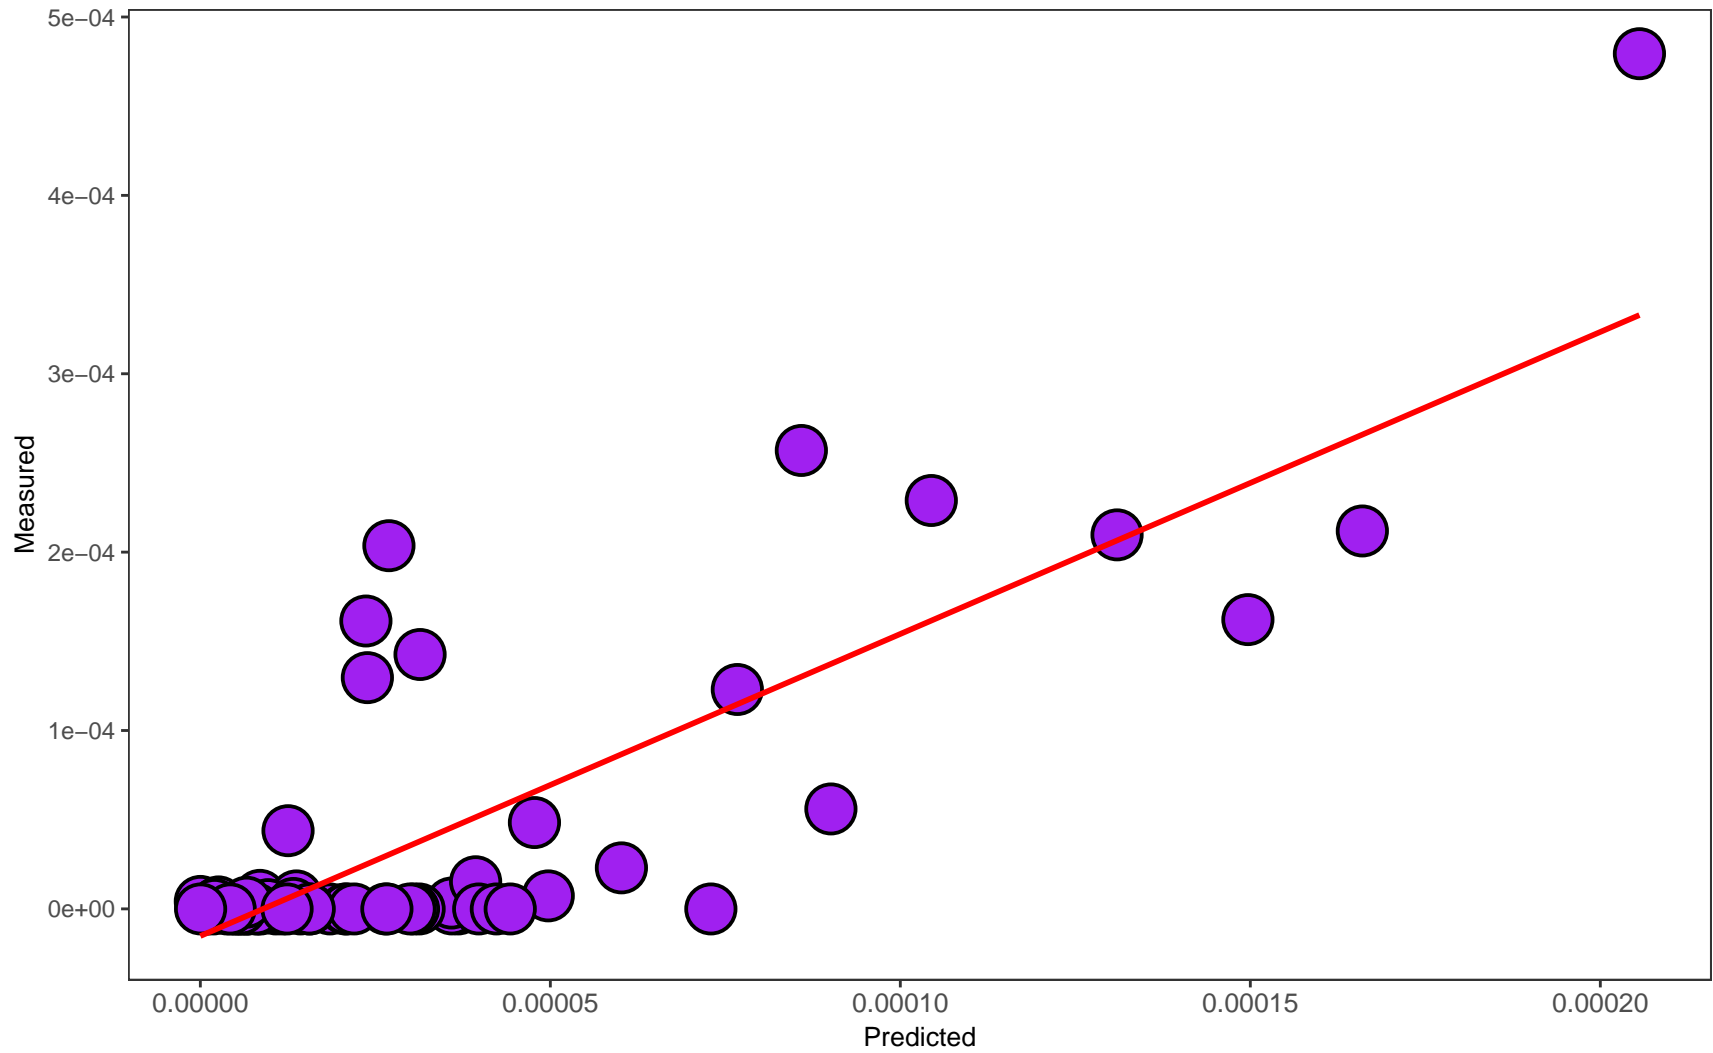

cholate (C18-neg\_Cluster\_1722): Spearman 0.6

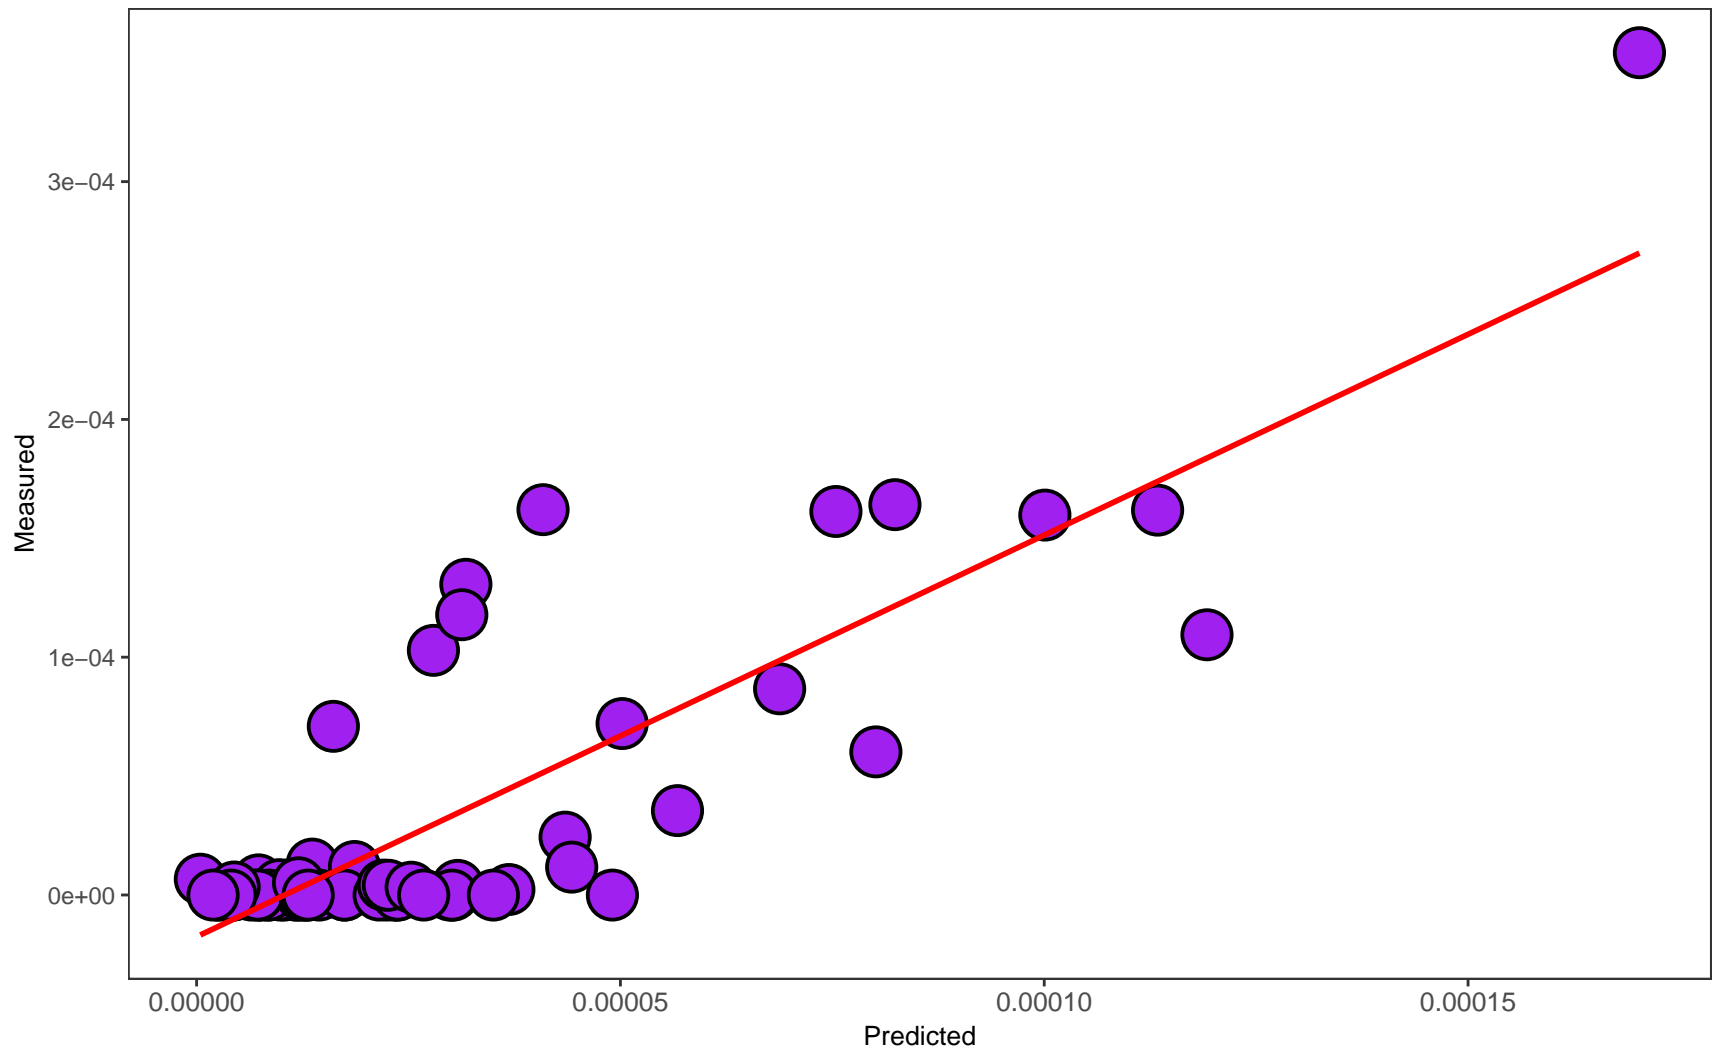

urobilin (C18-neg\_Cluster\_2021): Spearman 0.73

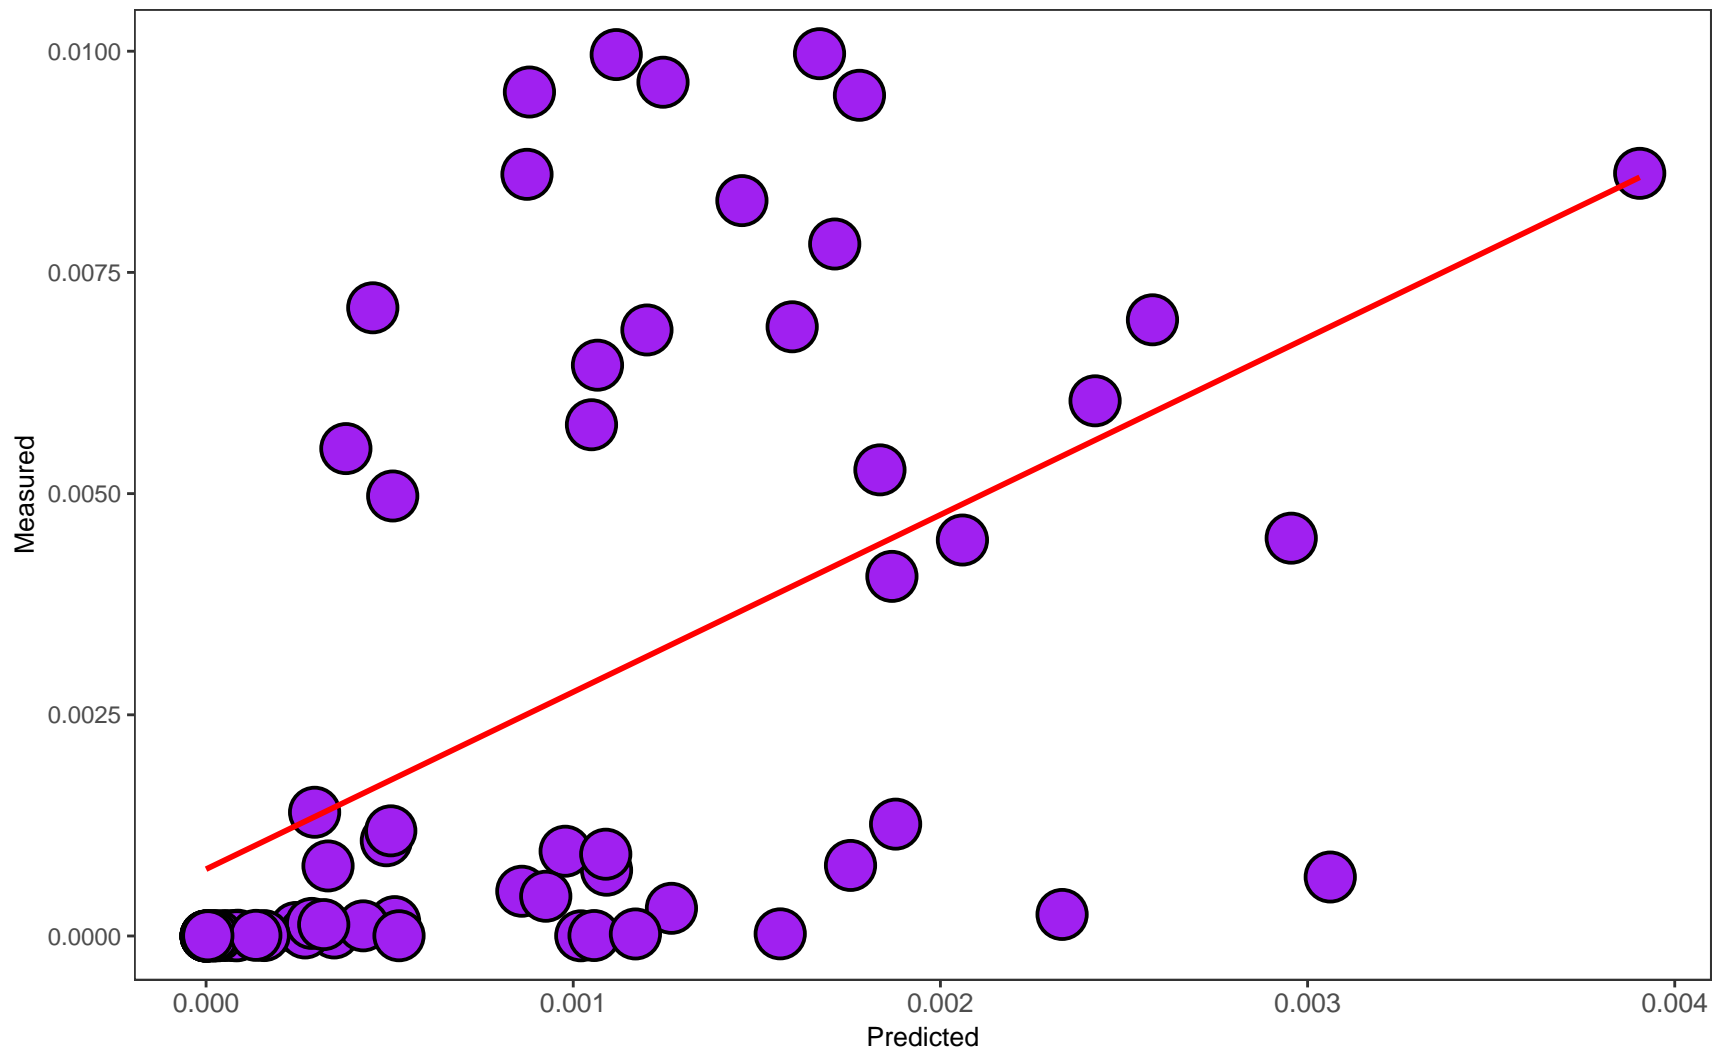

palmitoylethanolamide (C8-pos\_Cluster\_0168): Spearman 0.41

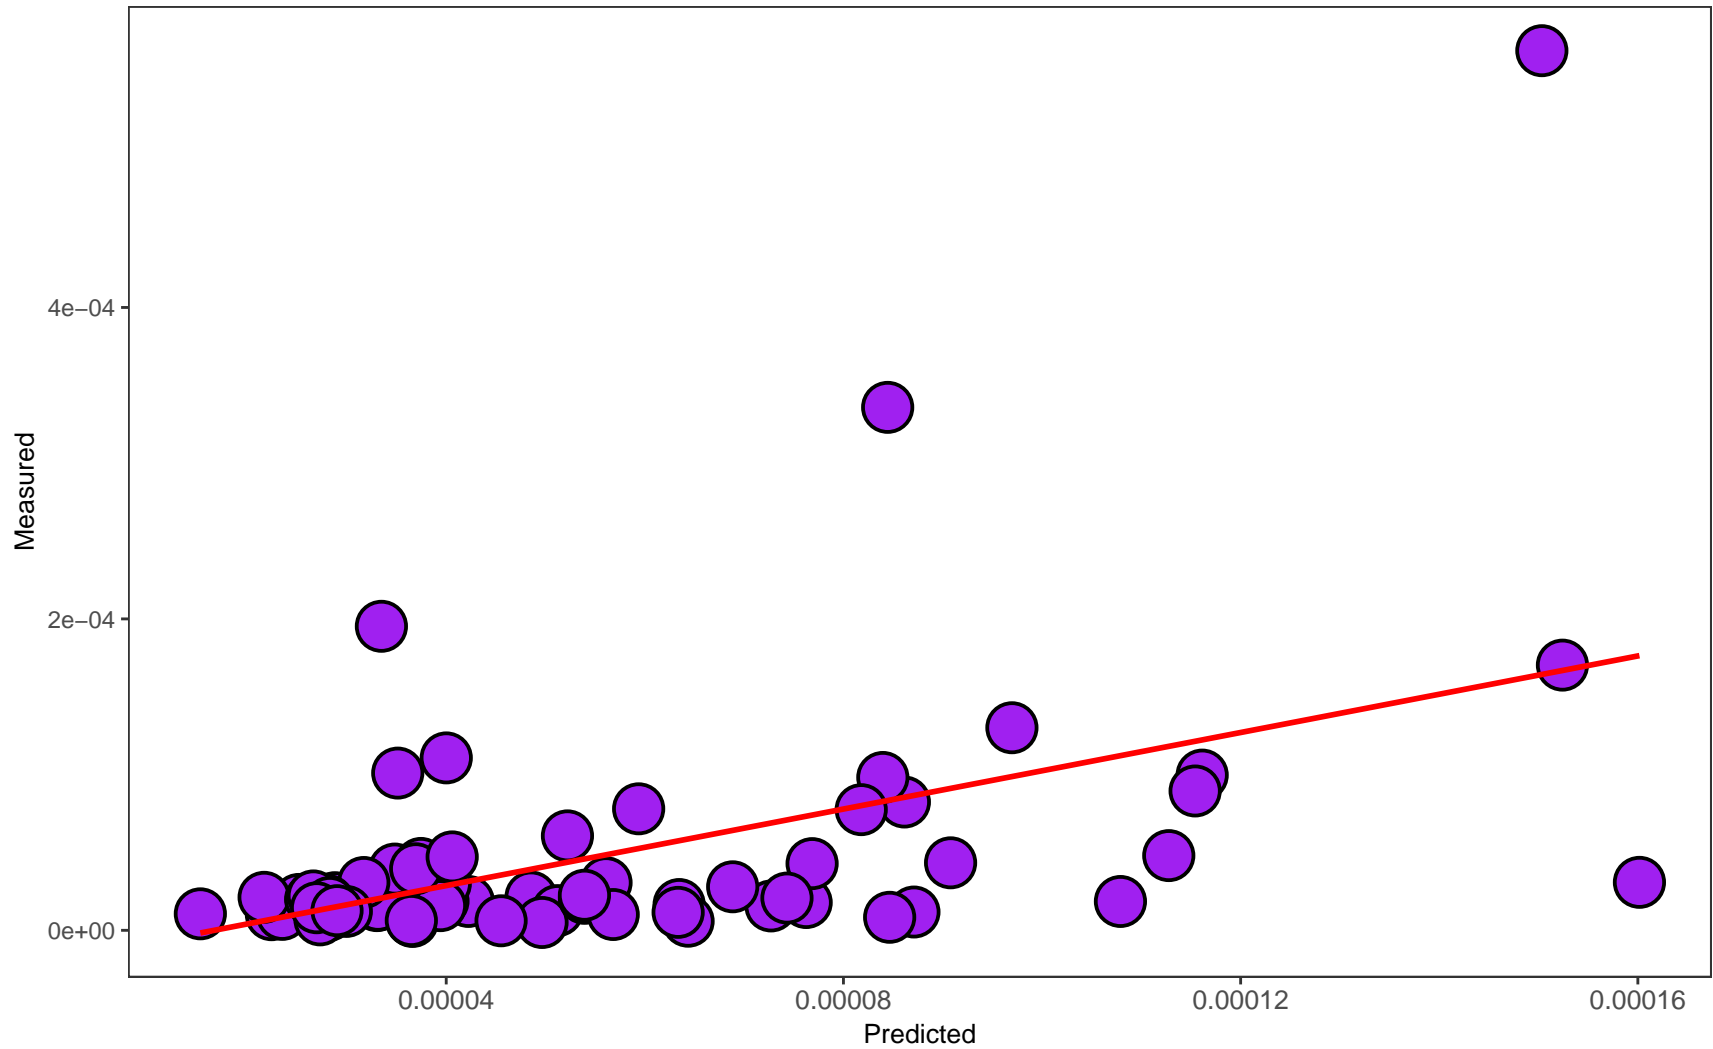

sphingosine (C8-pos\_Cluster\_0253): Spearman 0.44

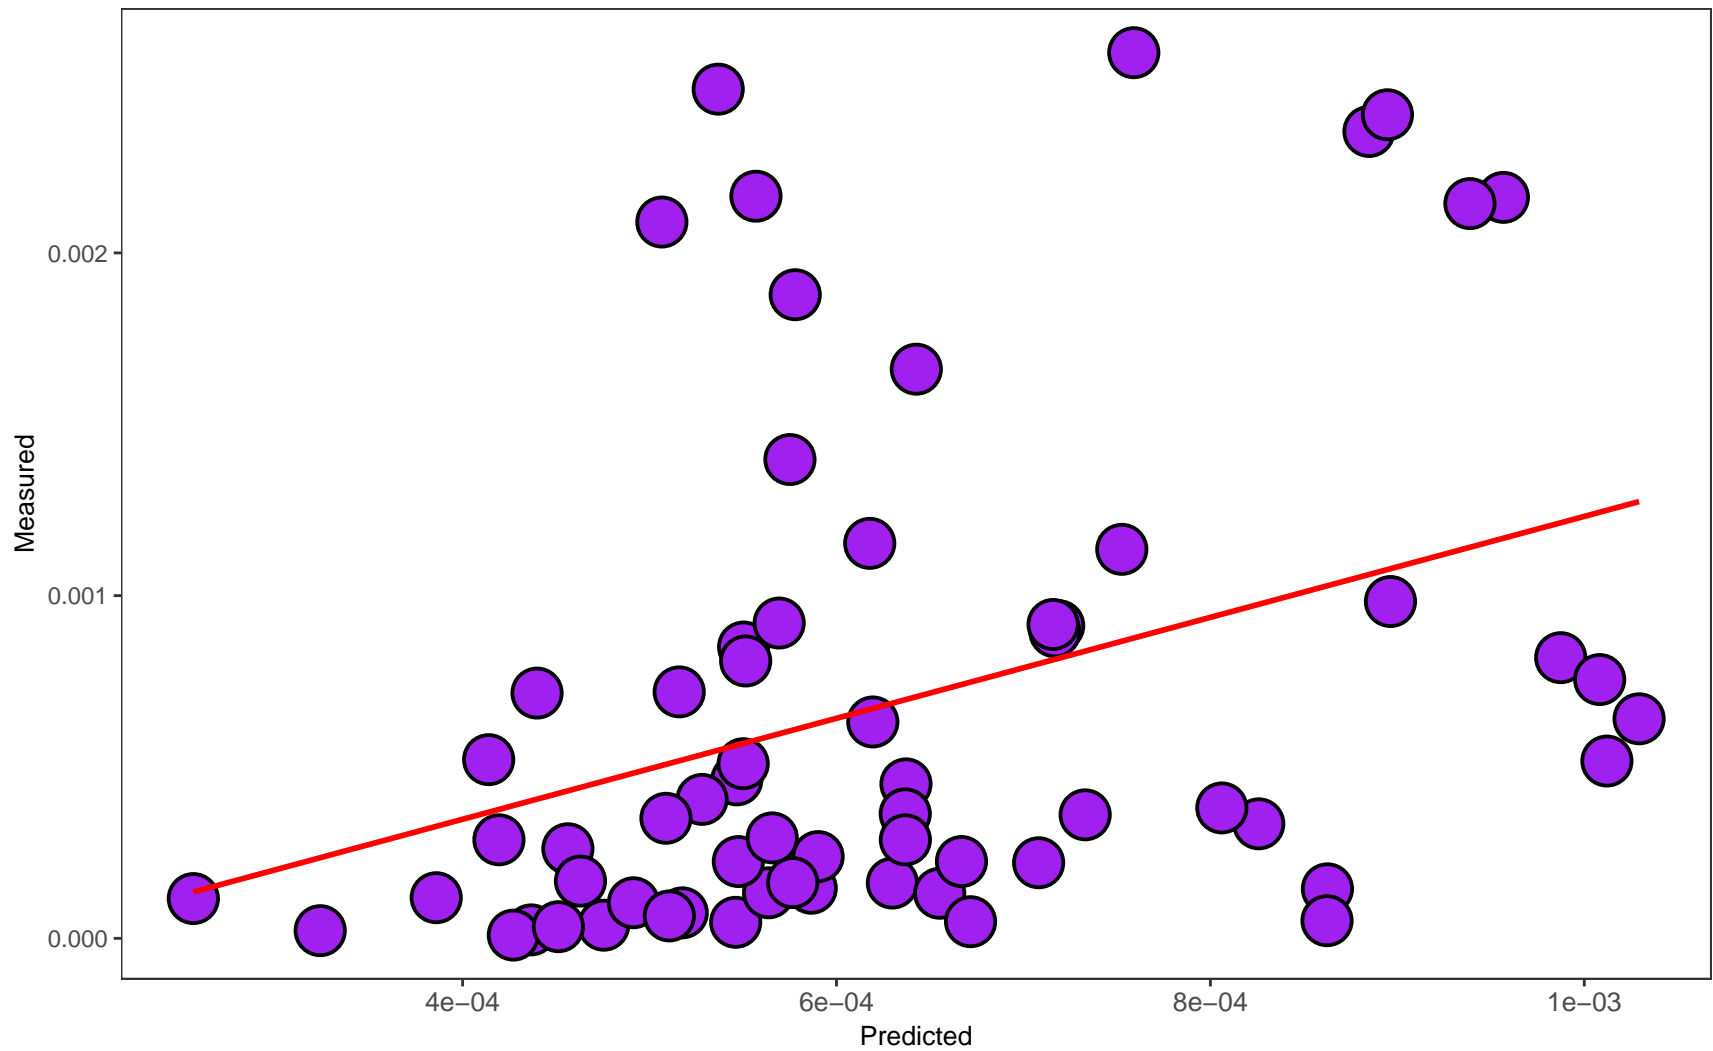

linoleoyl ethanolamide (C8-pos\_Cluster\_0264): Spearman 0.44

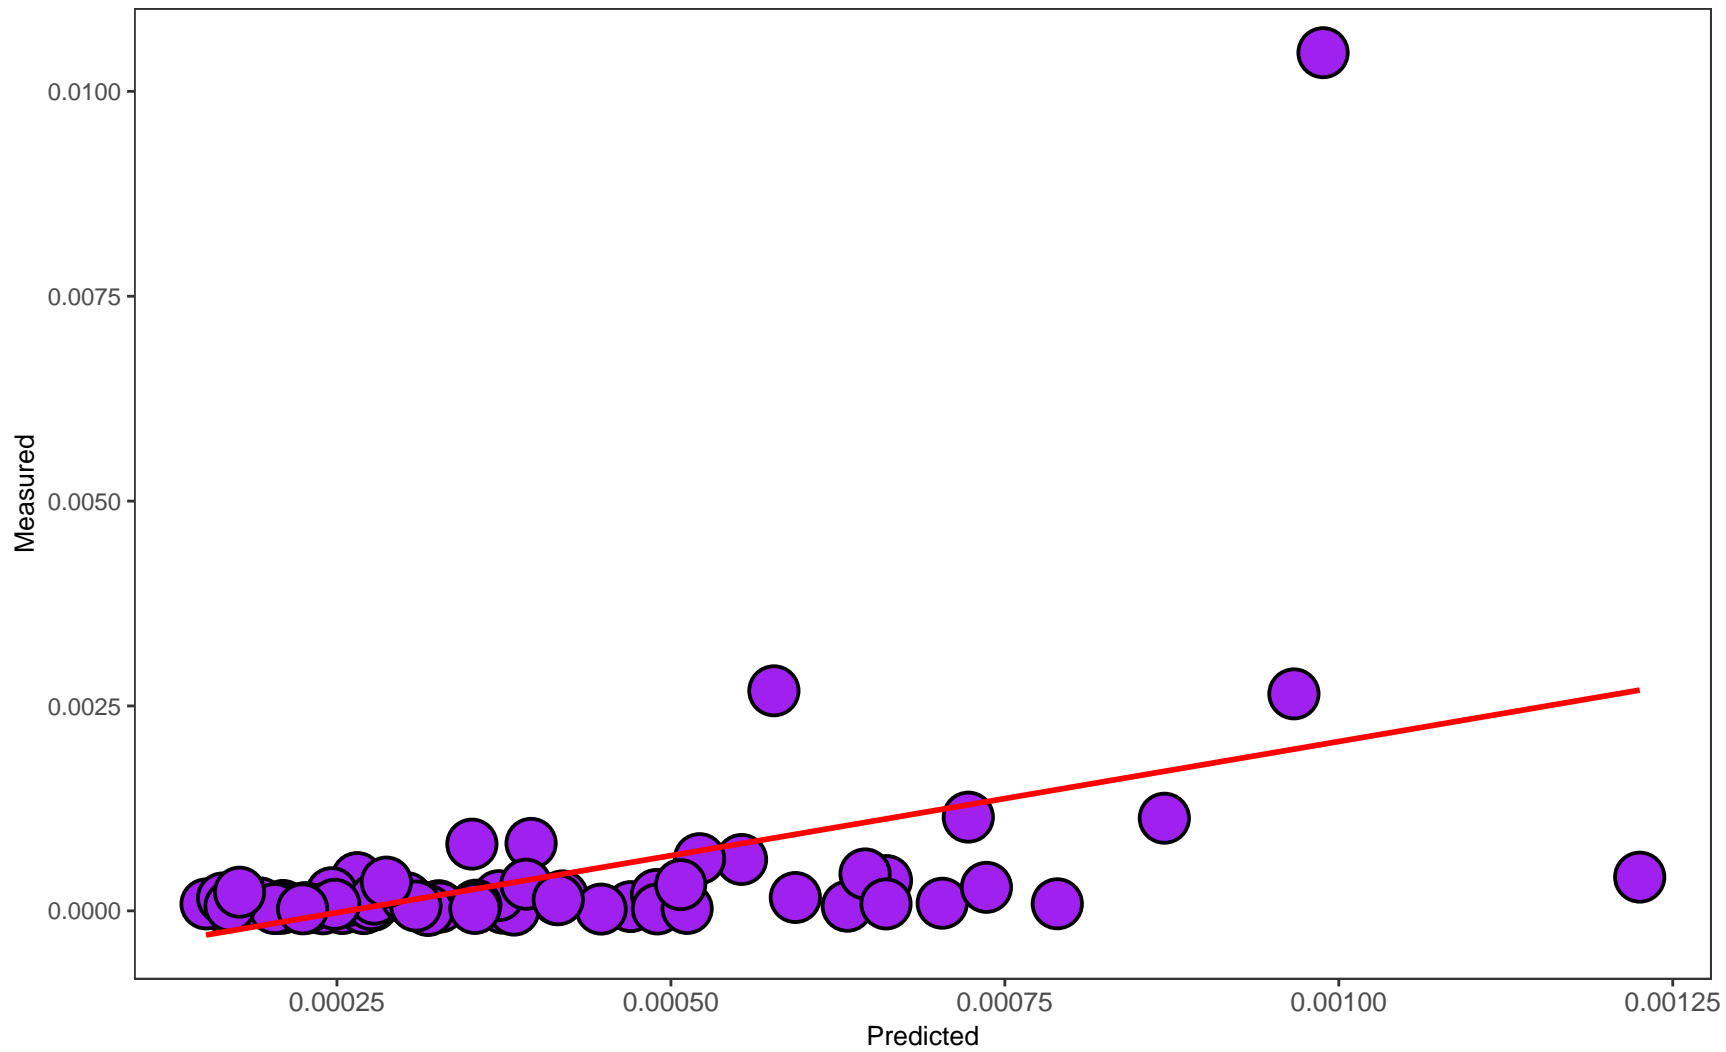

stearoyl ethanolamide (C8-pos\_Cluster\_0277): Spearman 0.49

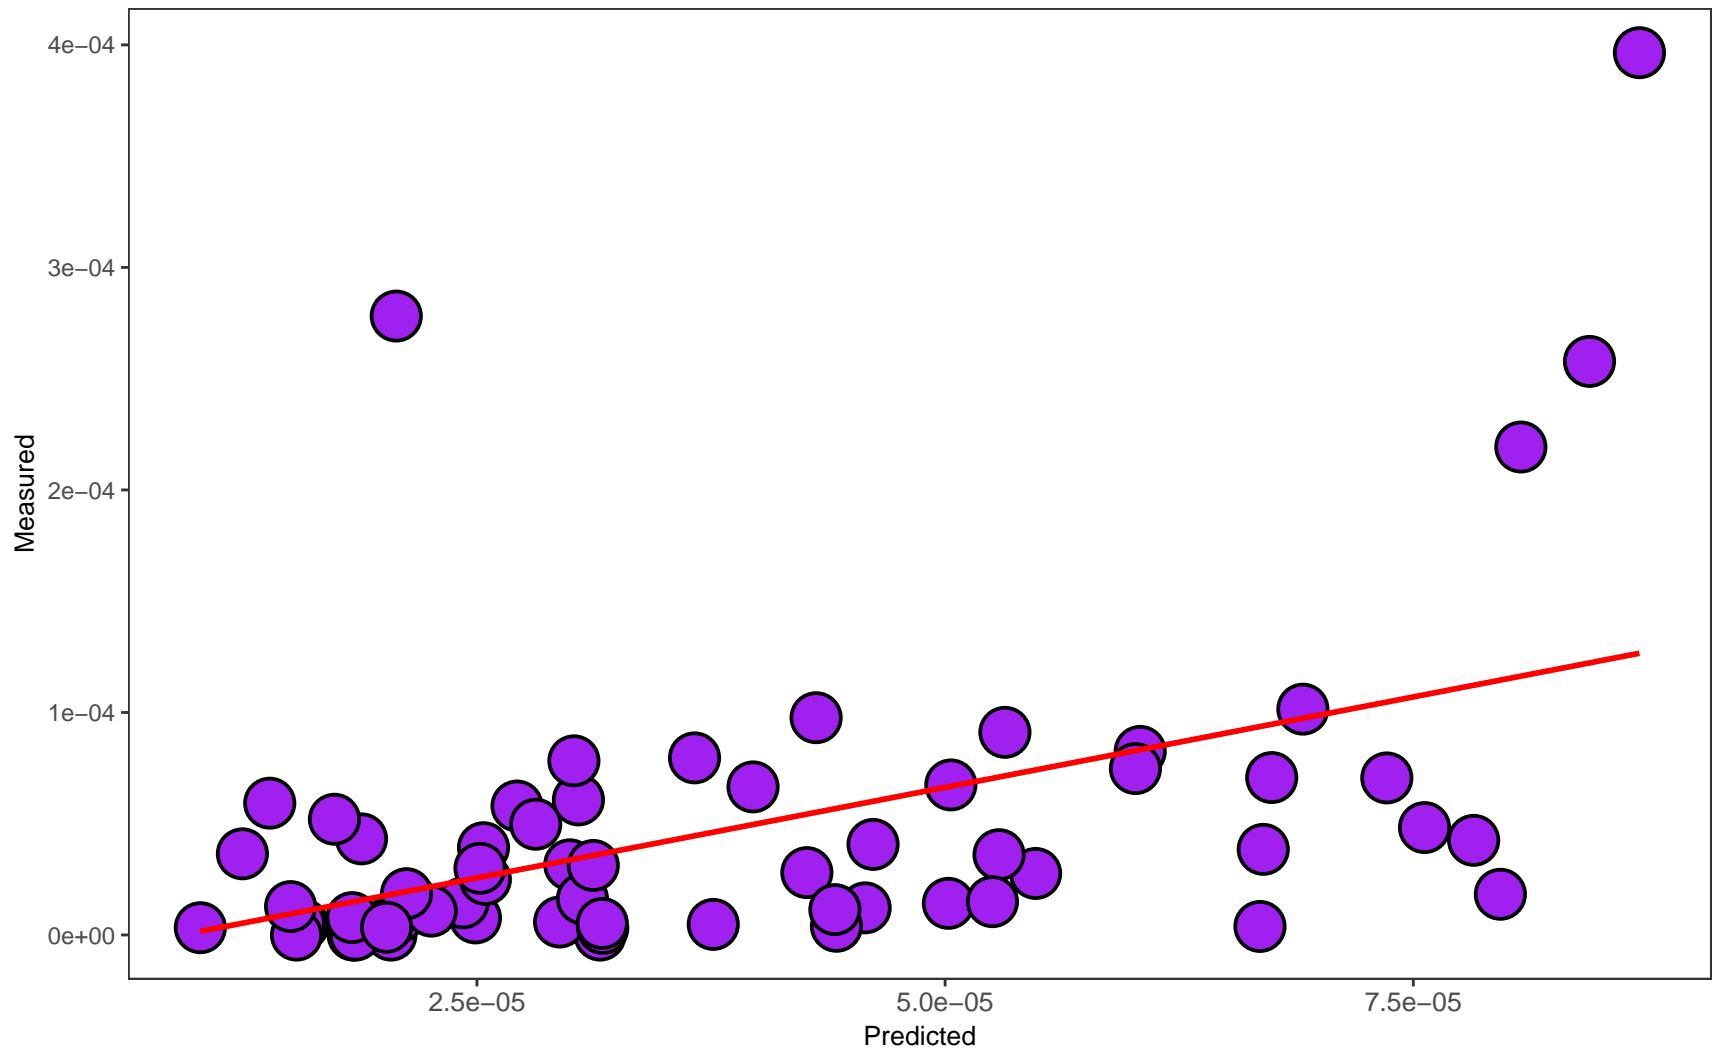

palmitoyl glycerol (C8-pos\_Cluster\_0288): Spearman 0.45

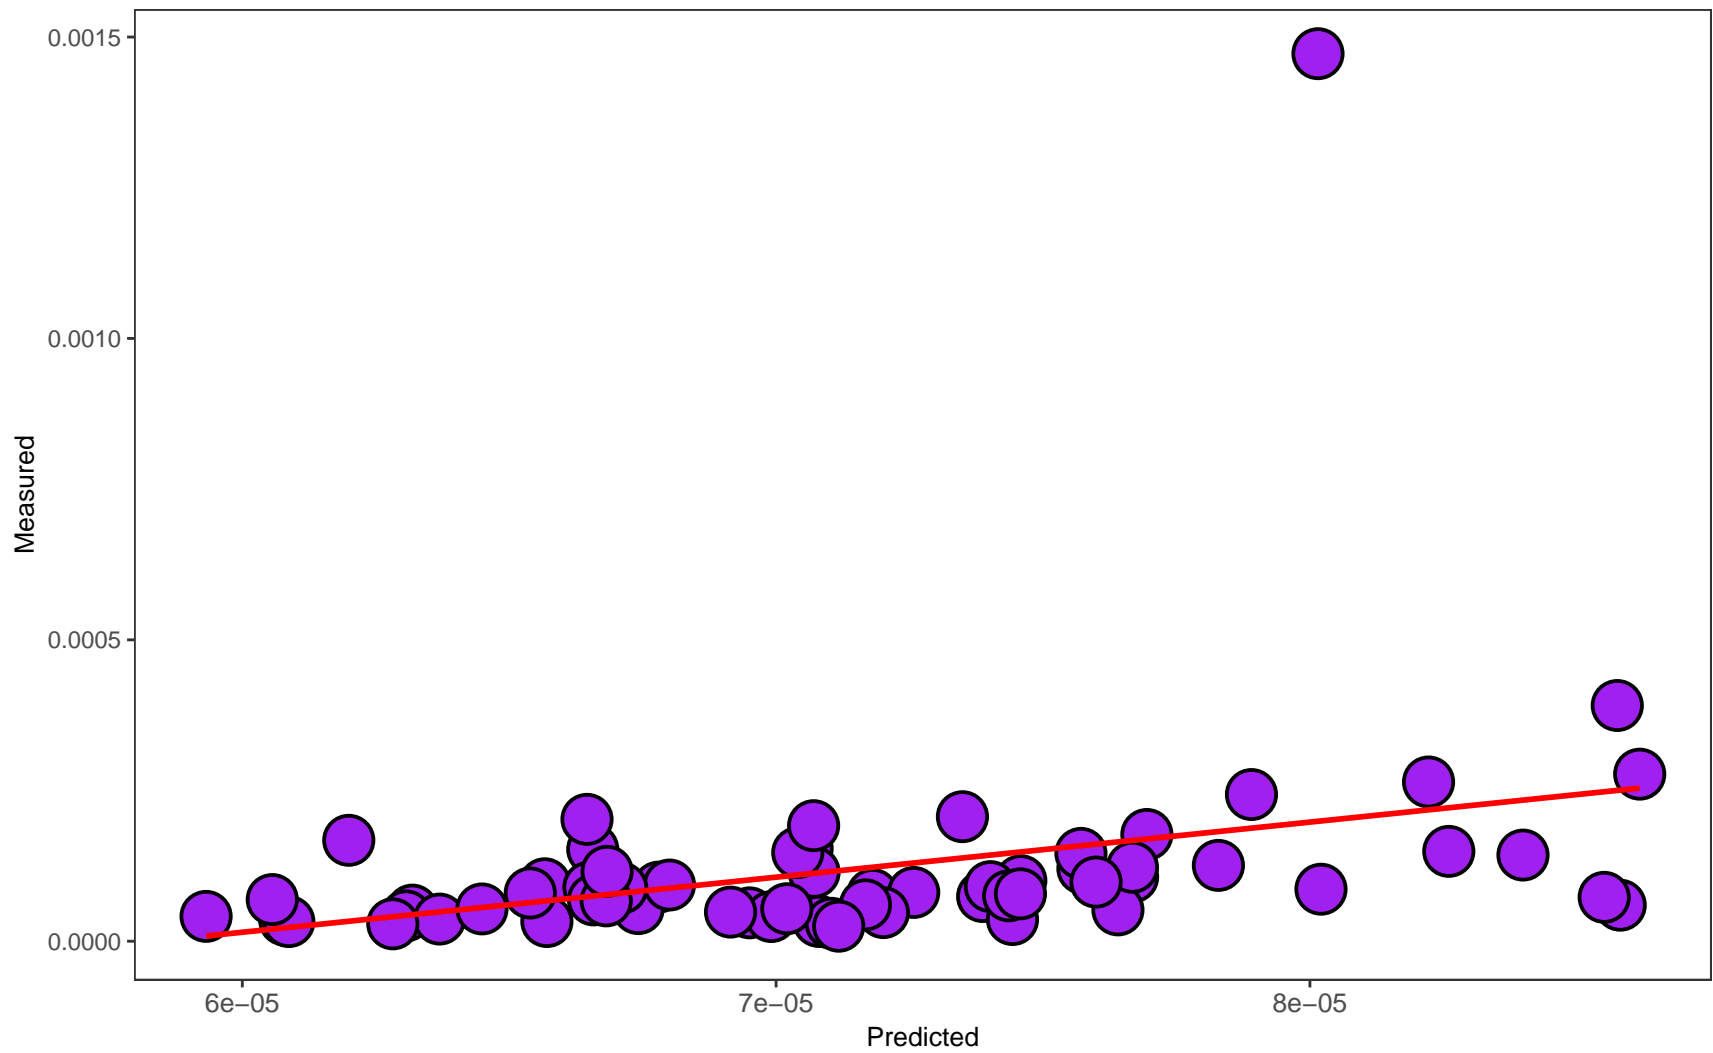



C18:0e MAG (C8-pos\_Cluster\_0338): Spearman 0.5

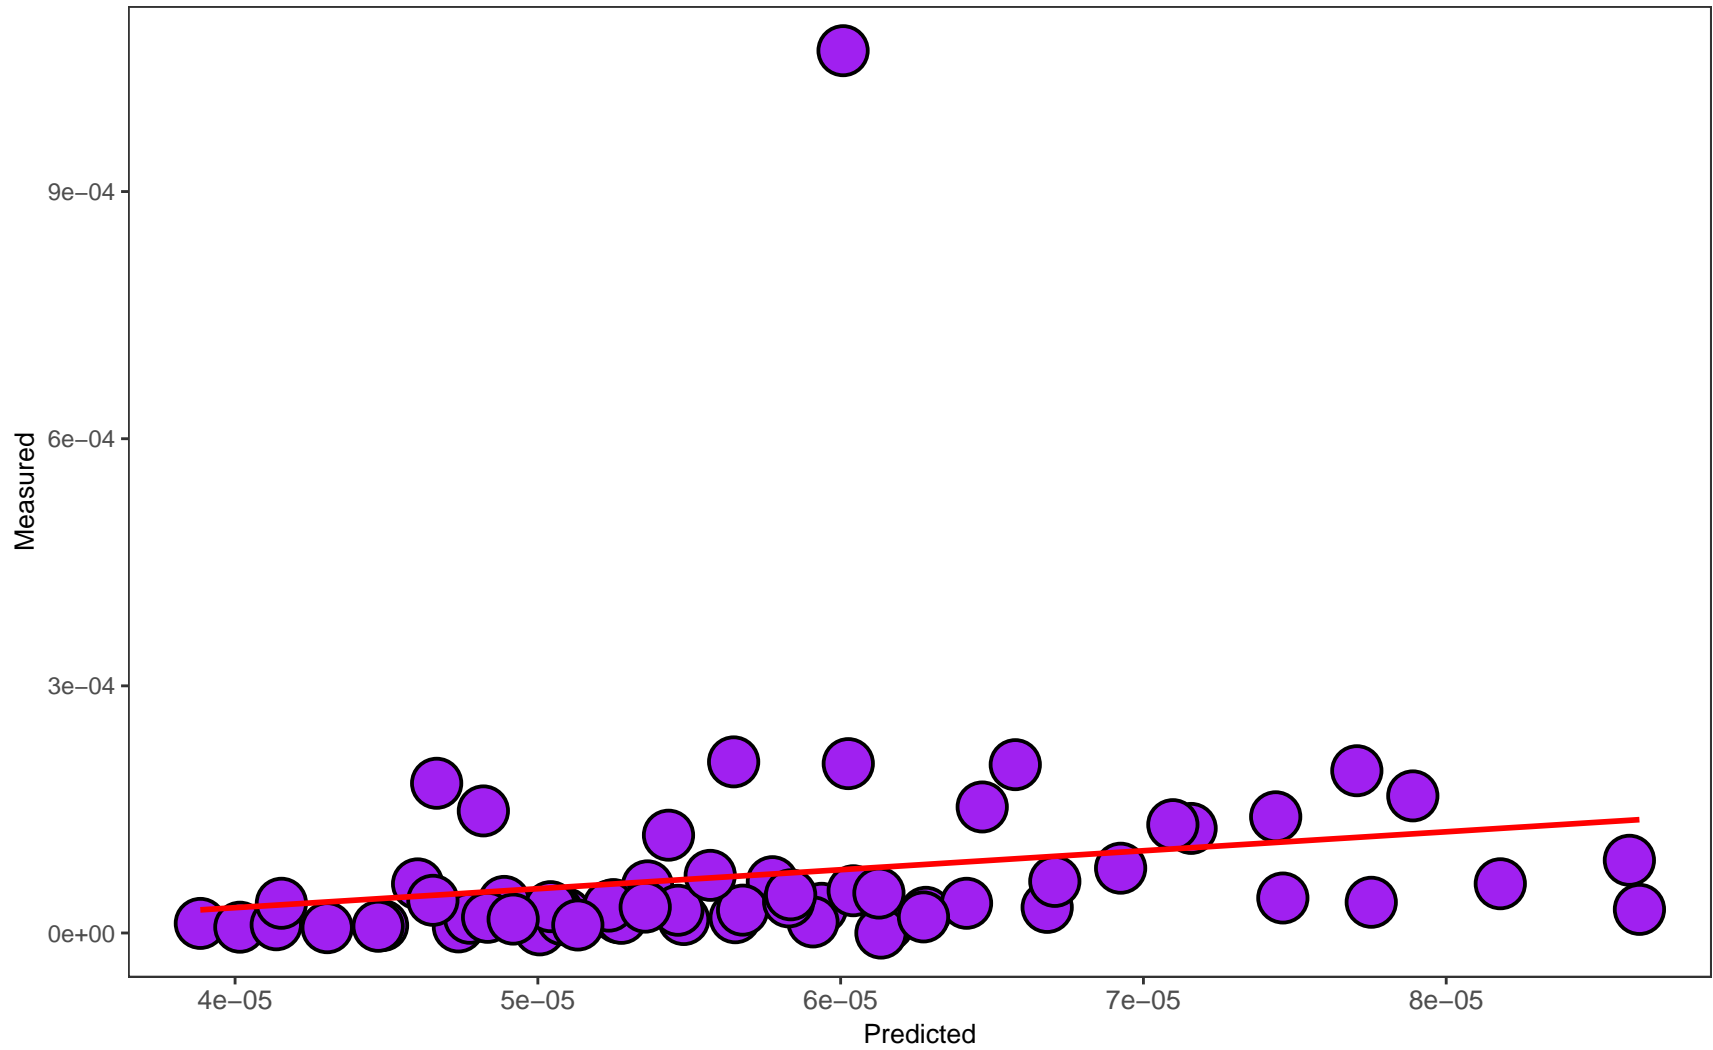

linoleoyl ethanolamide (C8-pos\_Cluster\_0339): Spearman 0.45

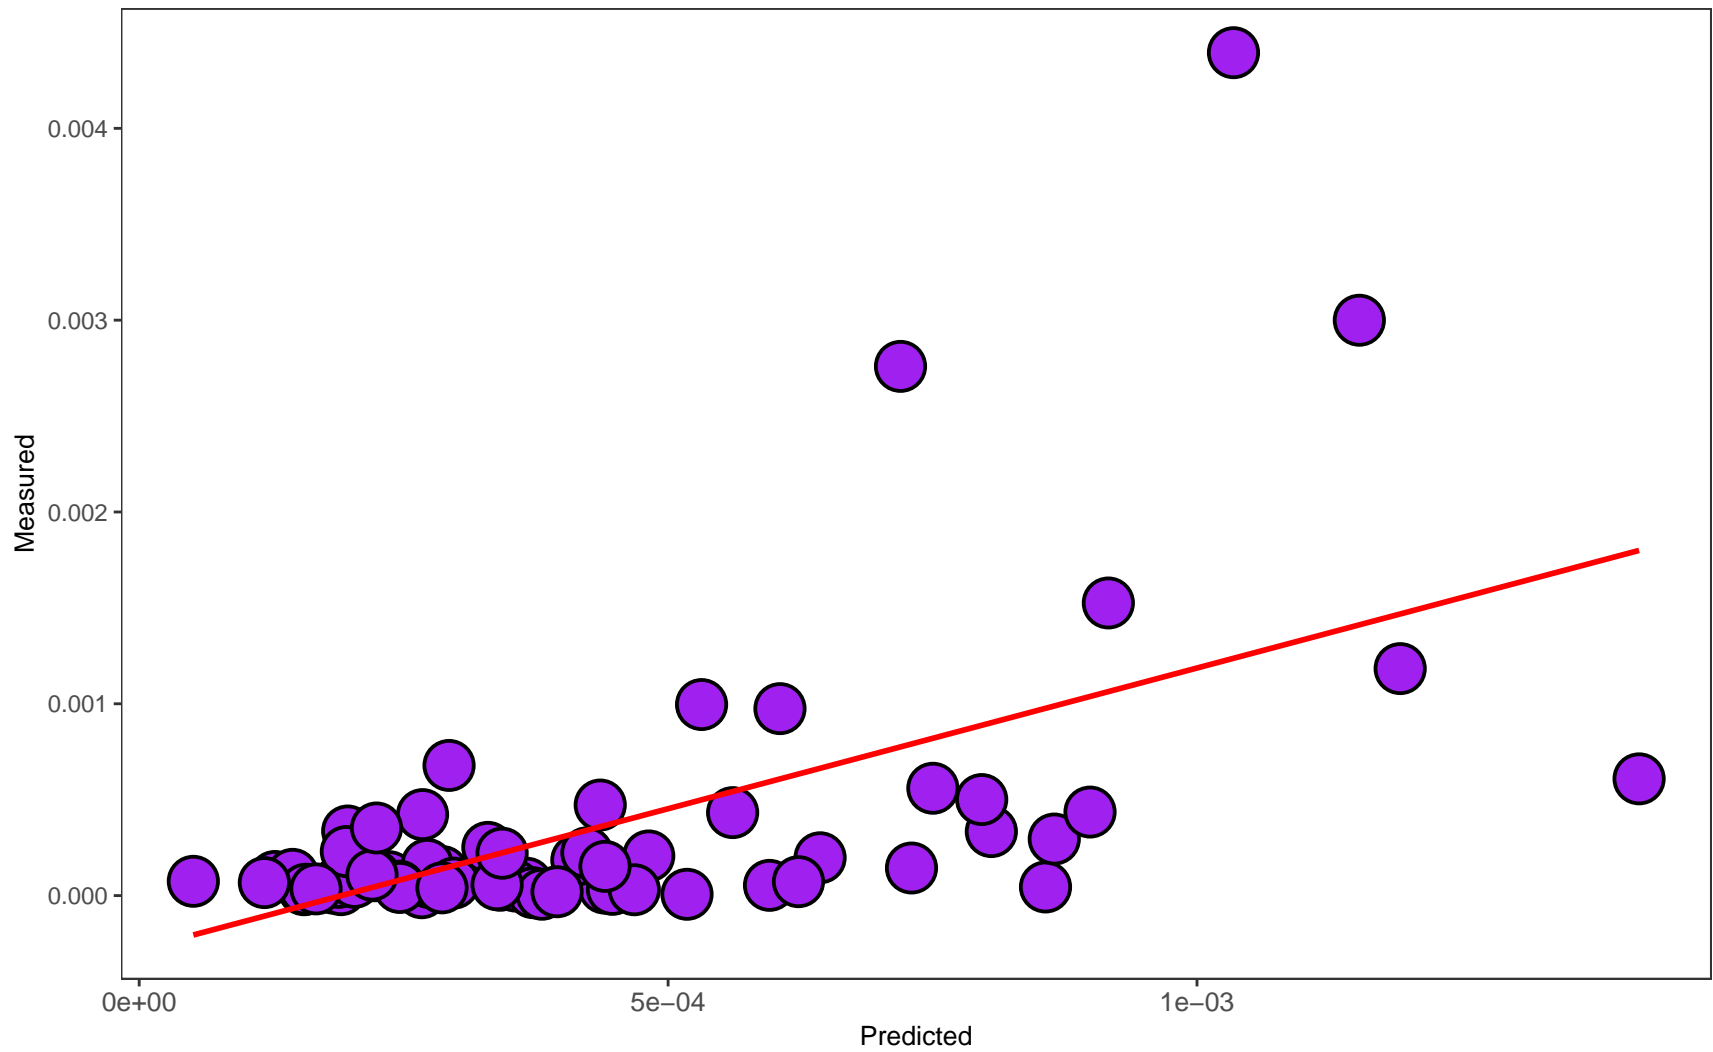

N-oleoylethanolamine (C8-pos\_Cluster\_0341): Spearman 0.42

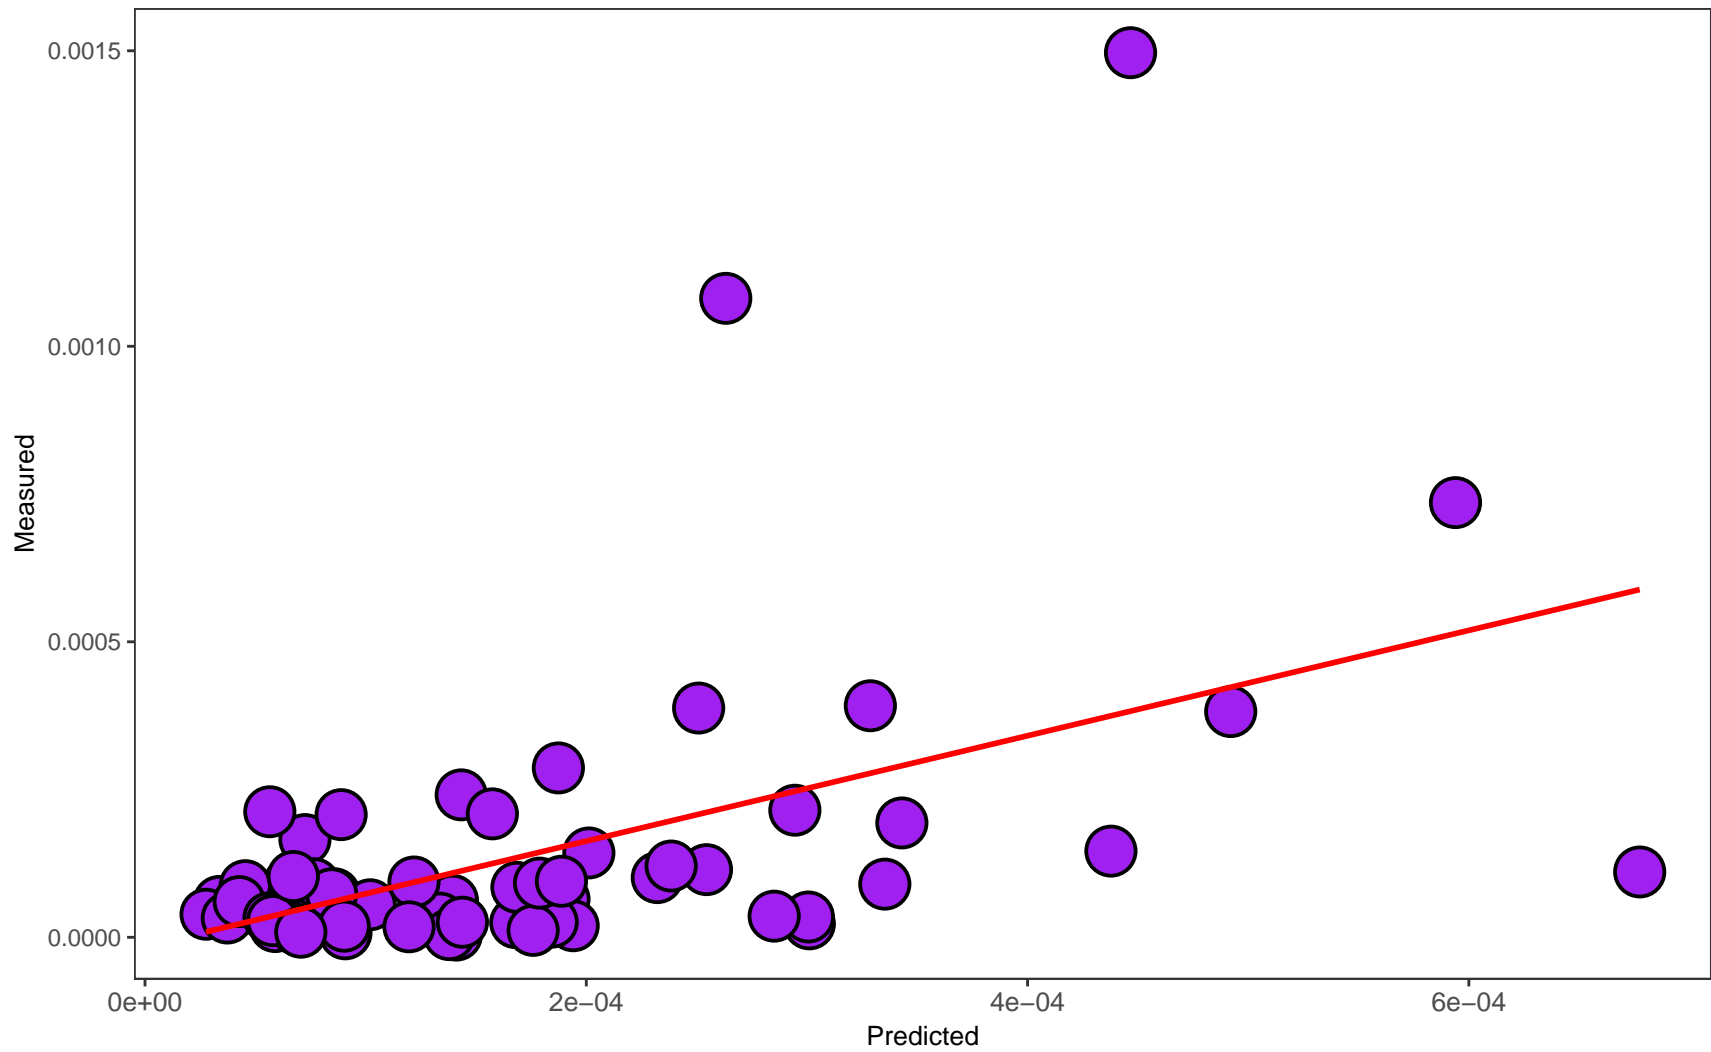

C18:0e MAG (C8-pos\_Cluster\_0410): Spearman 0.55

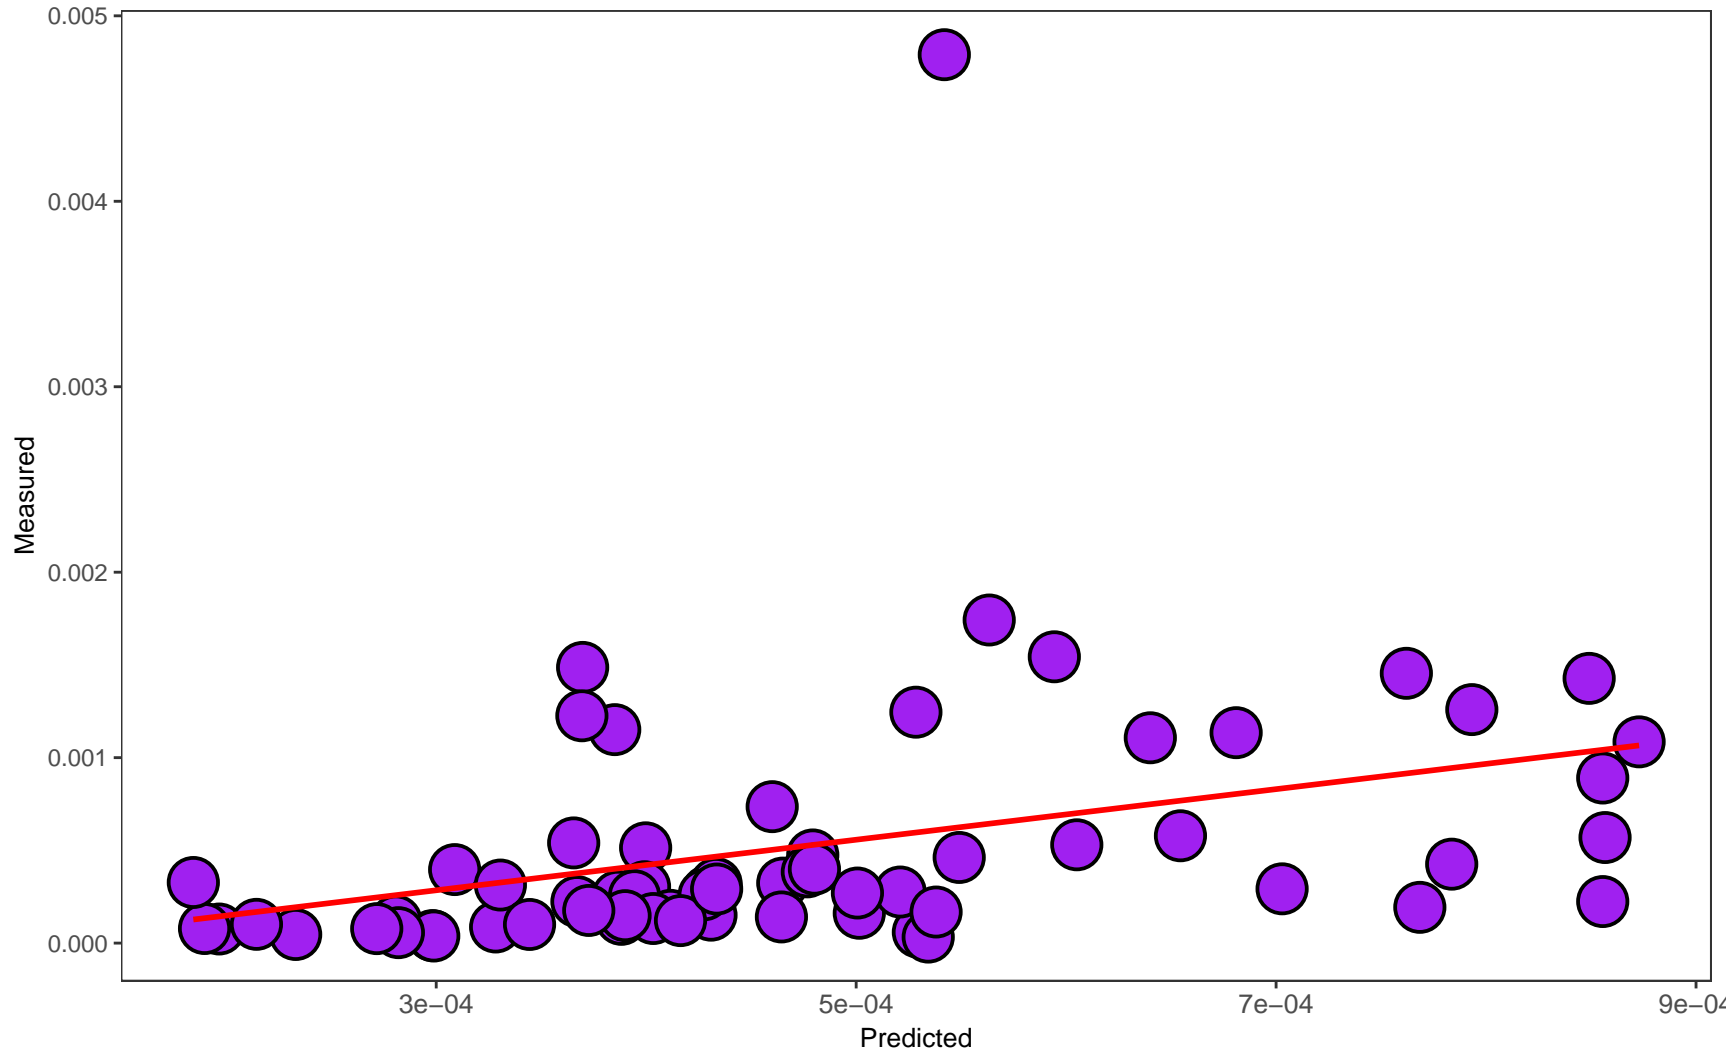

cholesterol (C8-pos\_Cluster\_0416): Spearman 0.51

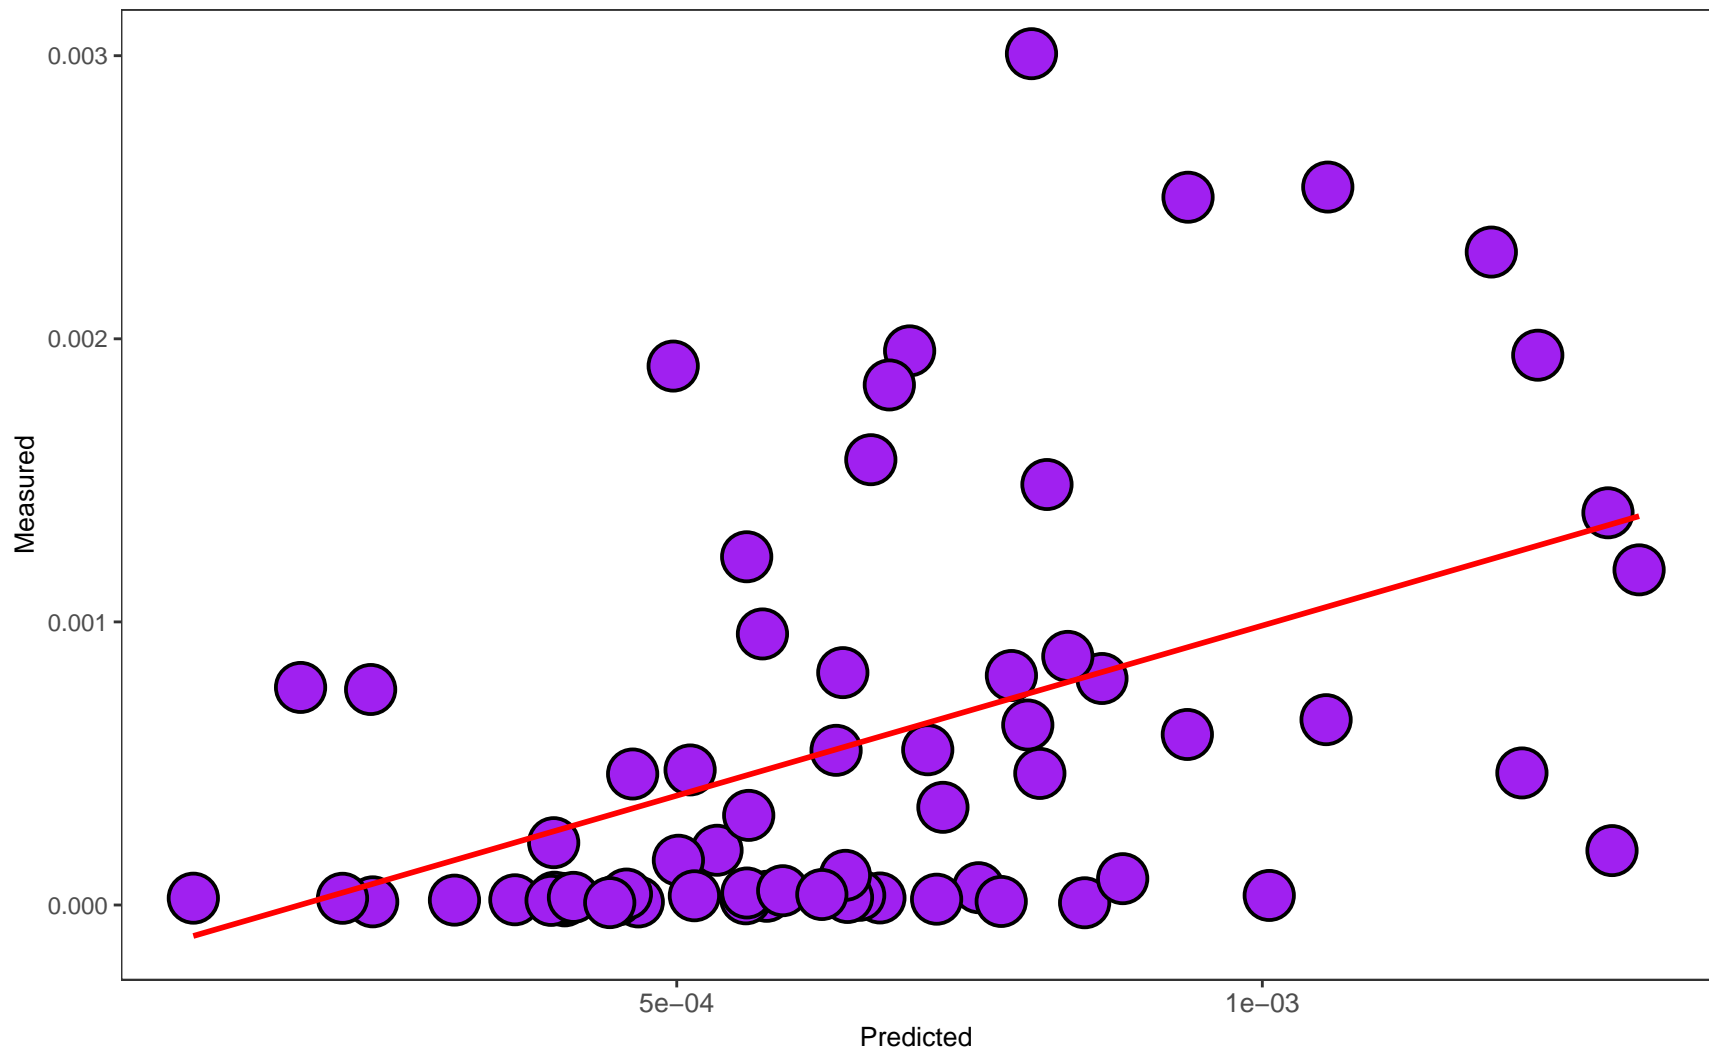

cholestenone (C8-pos\_Cluster\_0478): Spearman 0.52

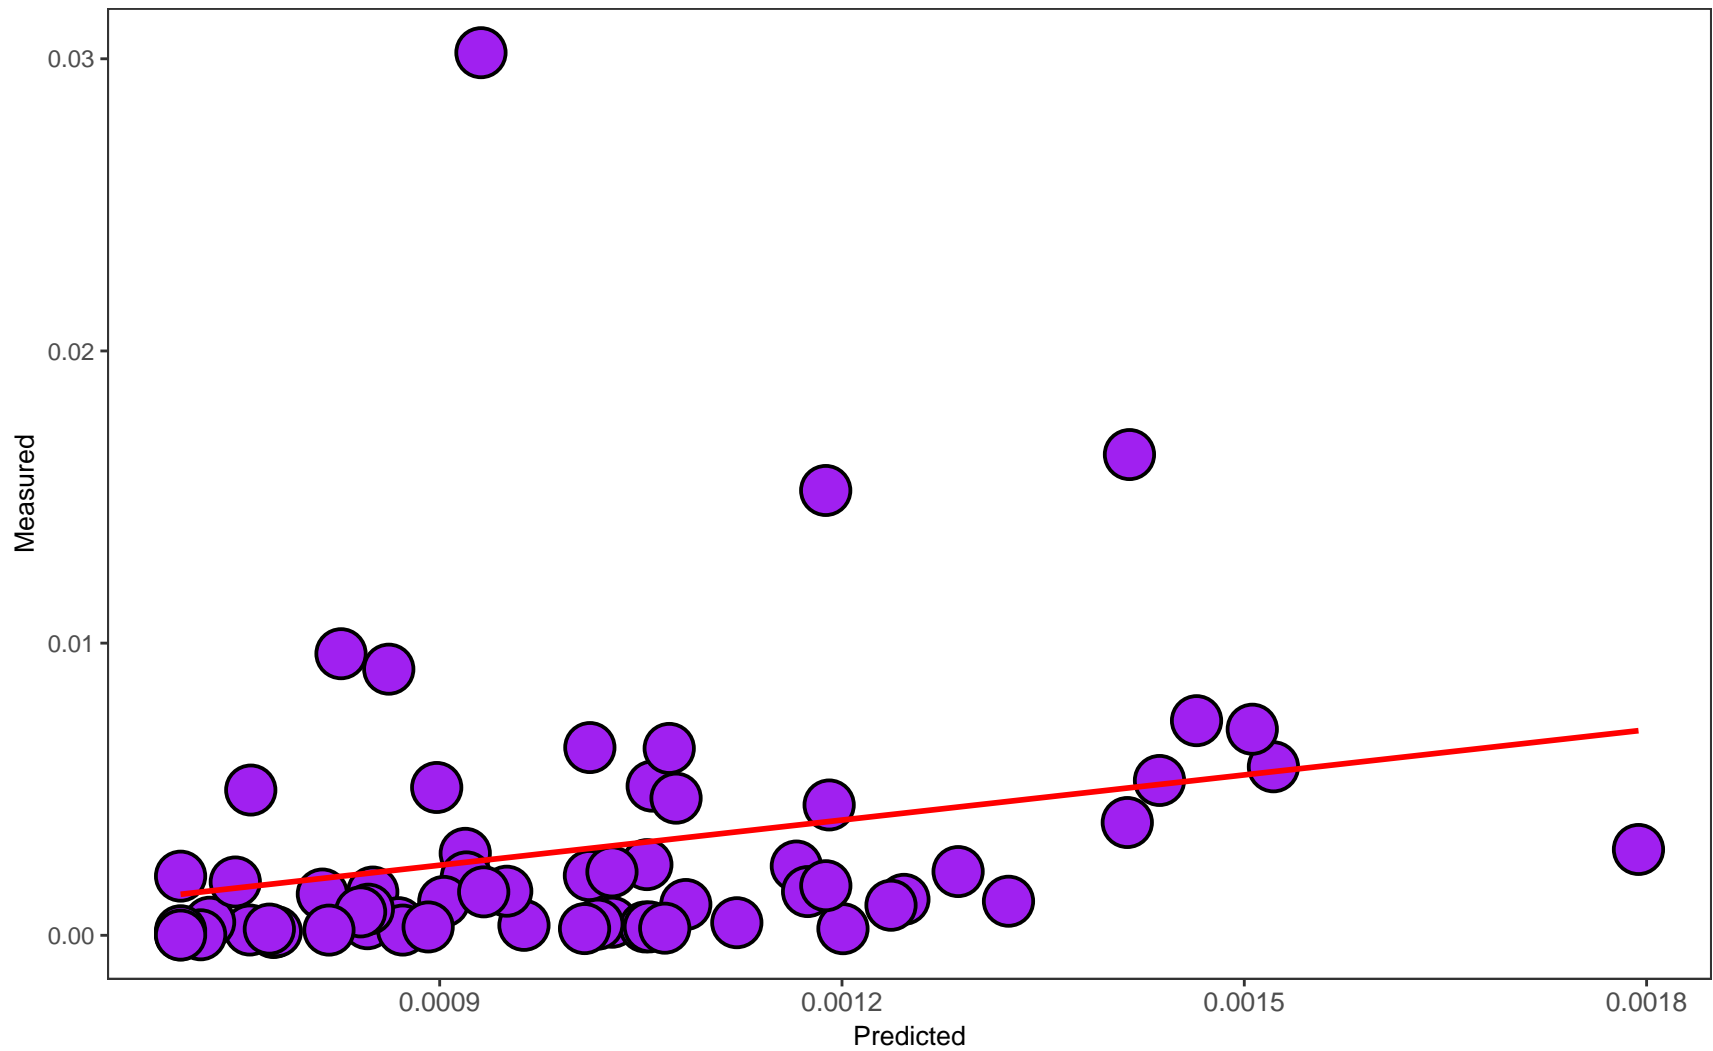

cholestenone (C8-pos\_Cluster\_0554): Spearman 0.53

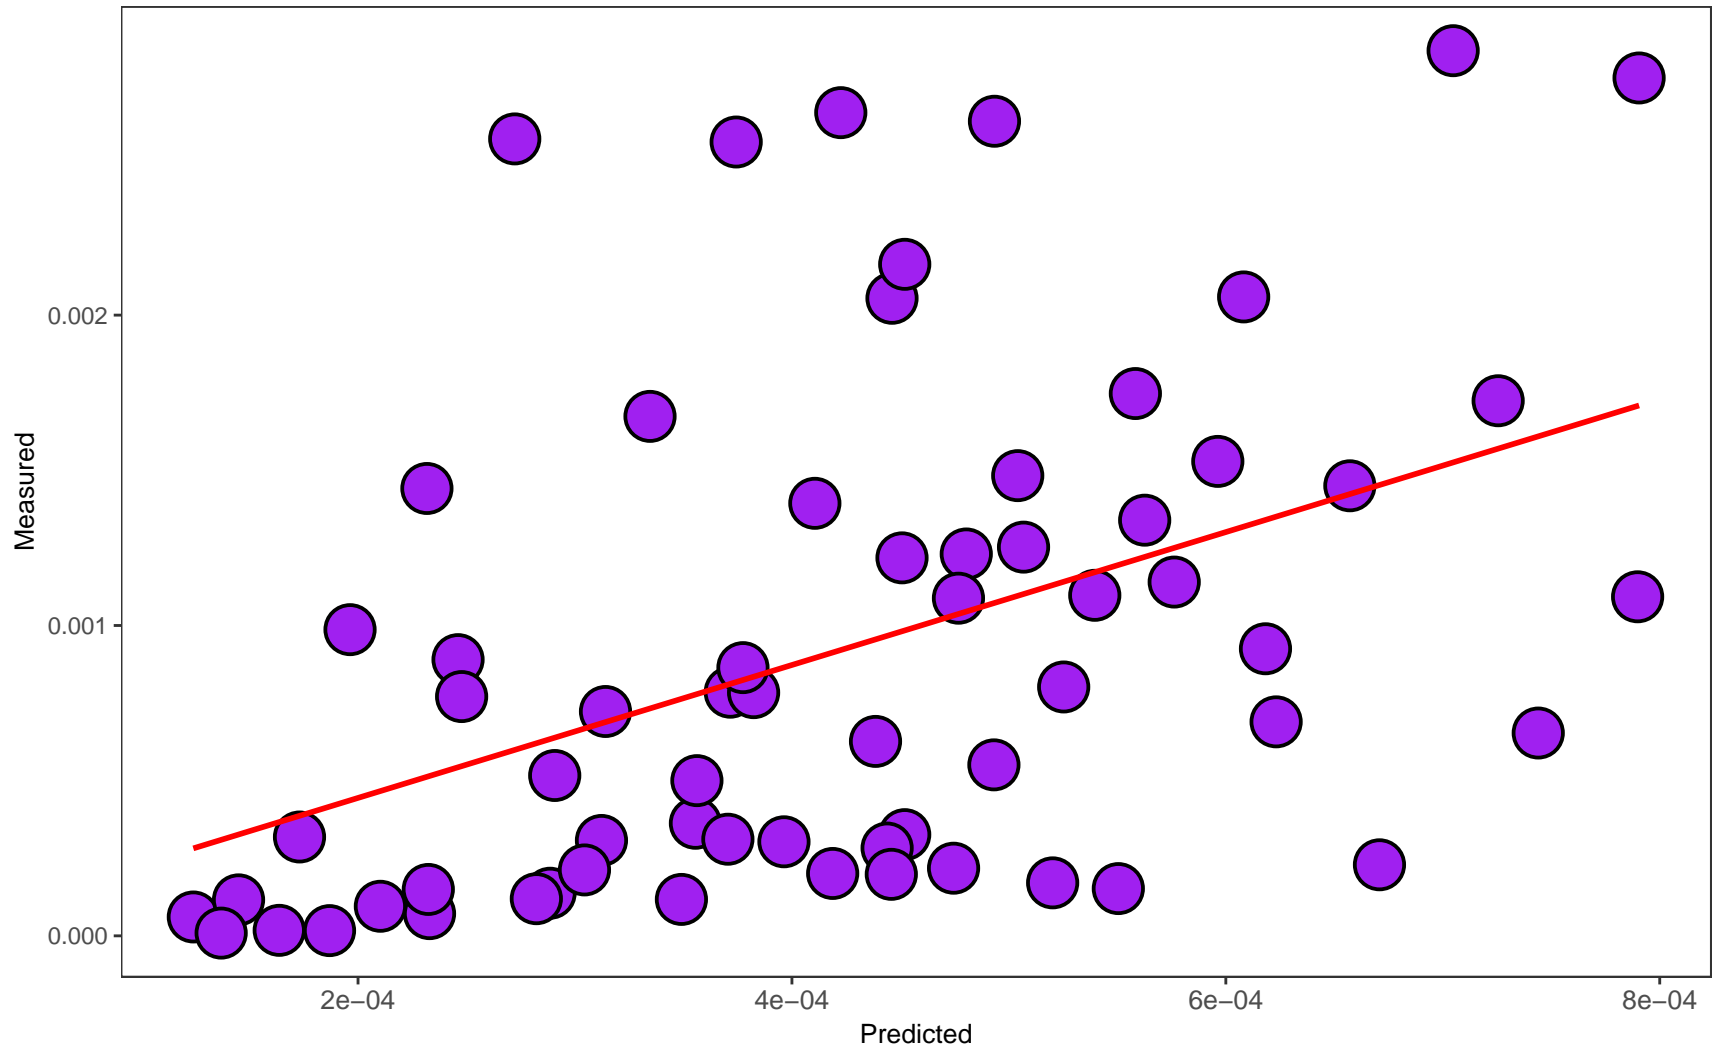

C16:0 LPC (C8-pos\_Cluster\_0878): Spearman 0.31

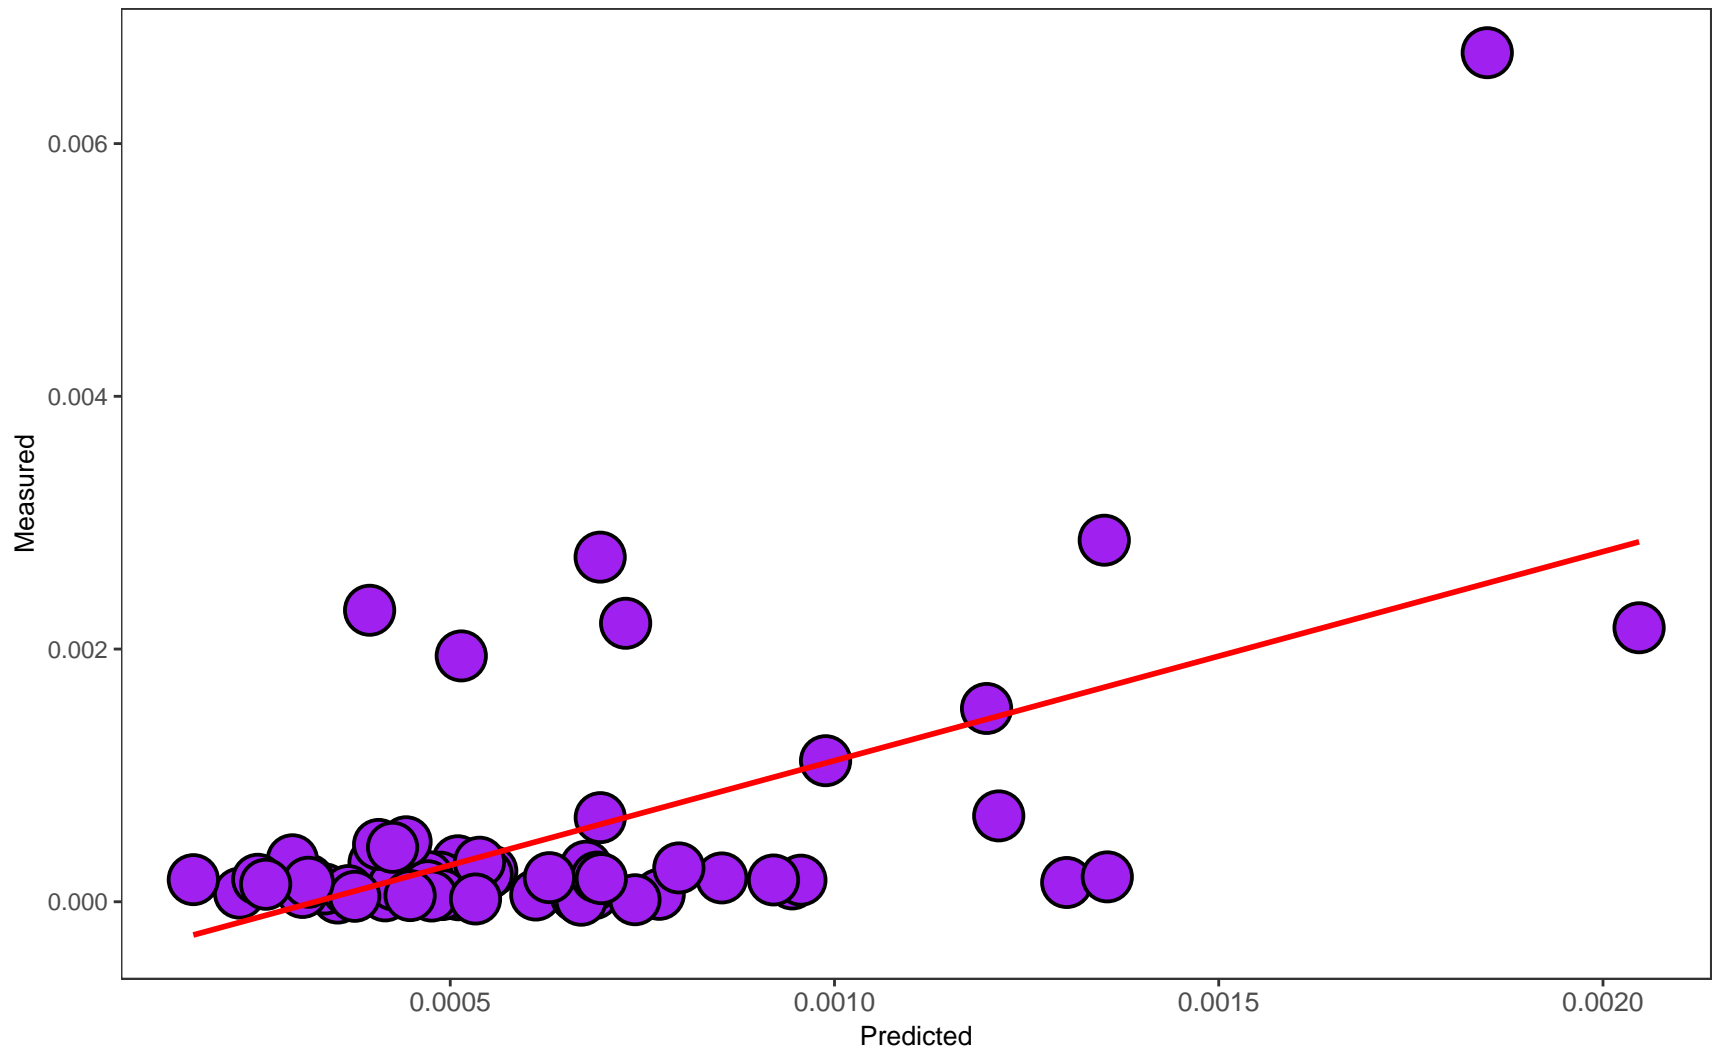



C16:0 ceramide (d18:1) (C8-pos\_Cluster\_1004): Spearman 0.58

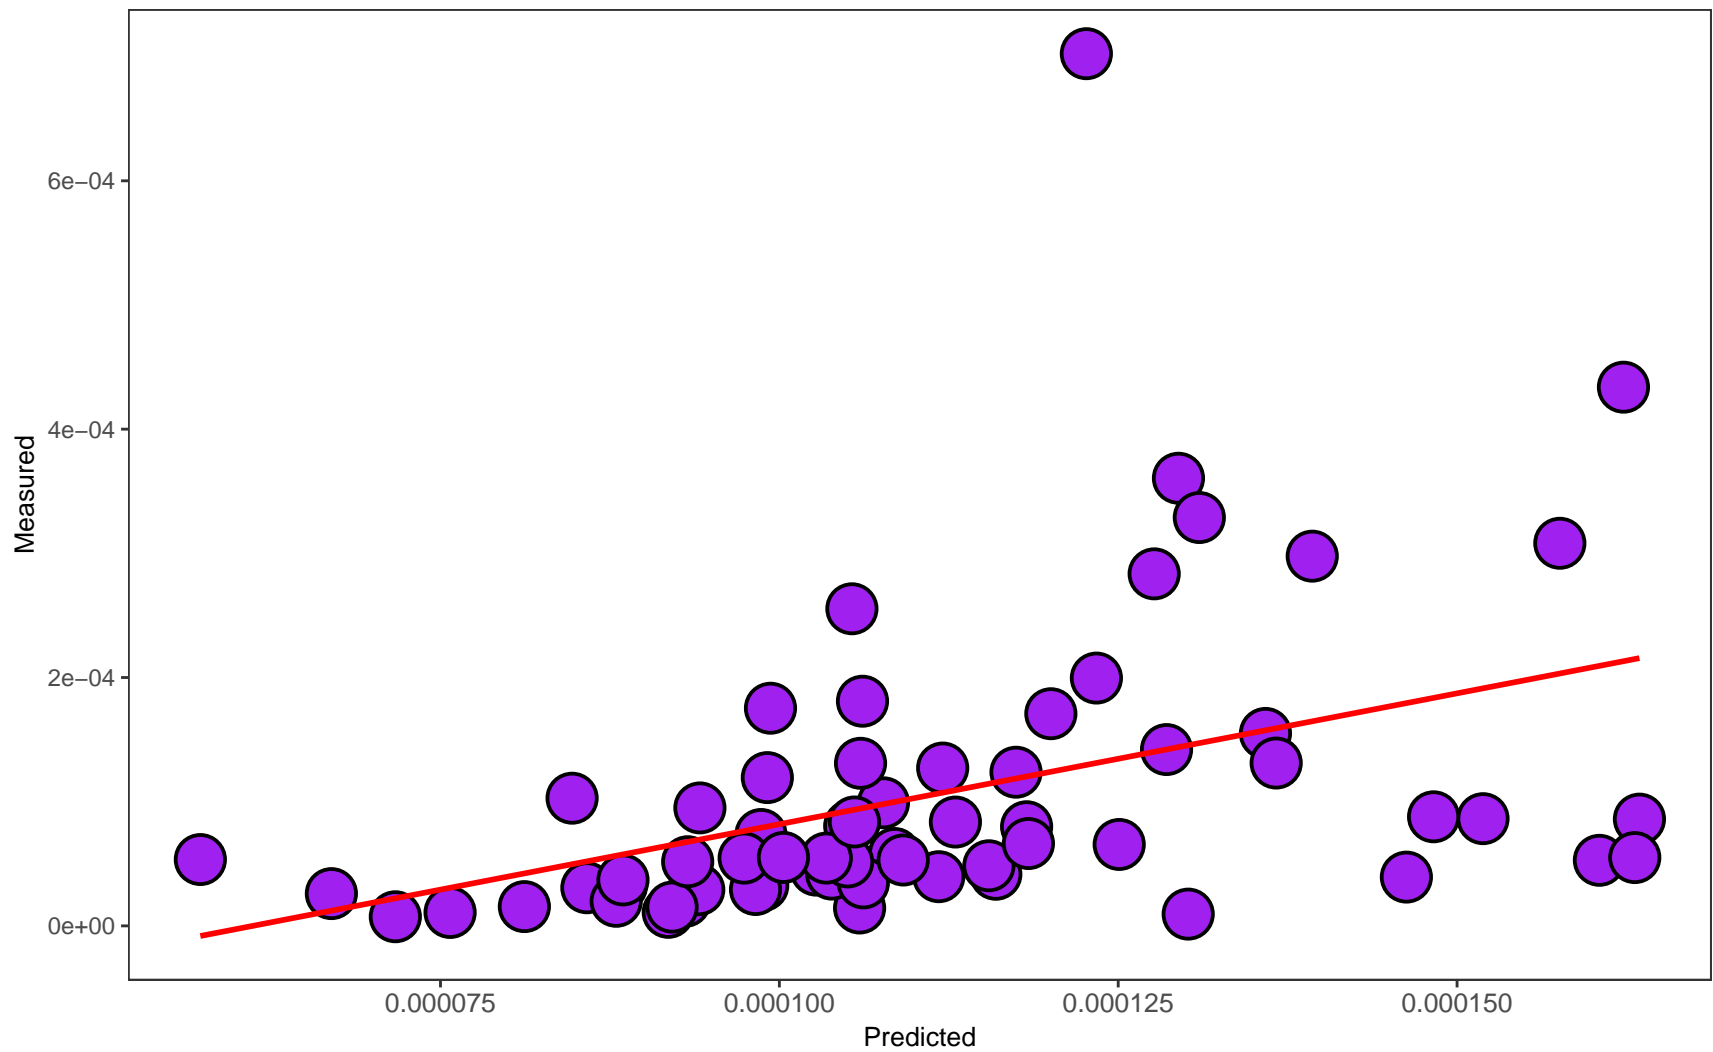

C18:1 CE (C8-pos\_Cluster\_1490): Spearman 0.49

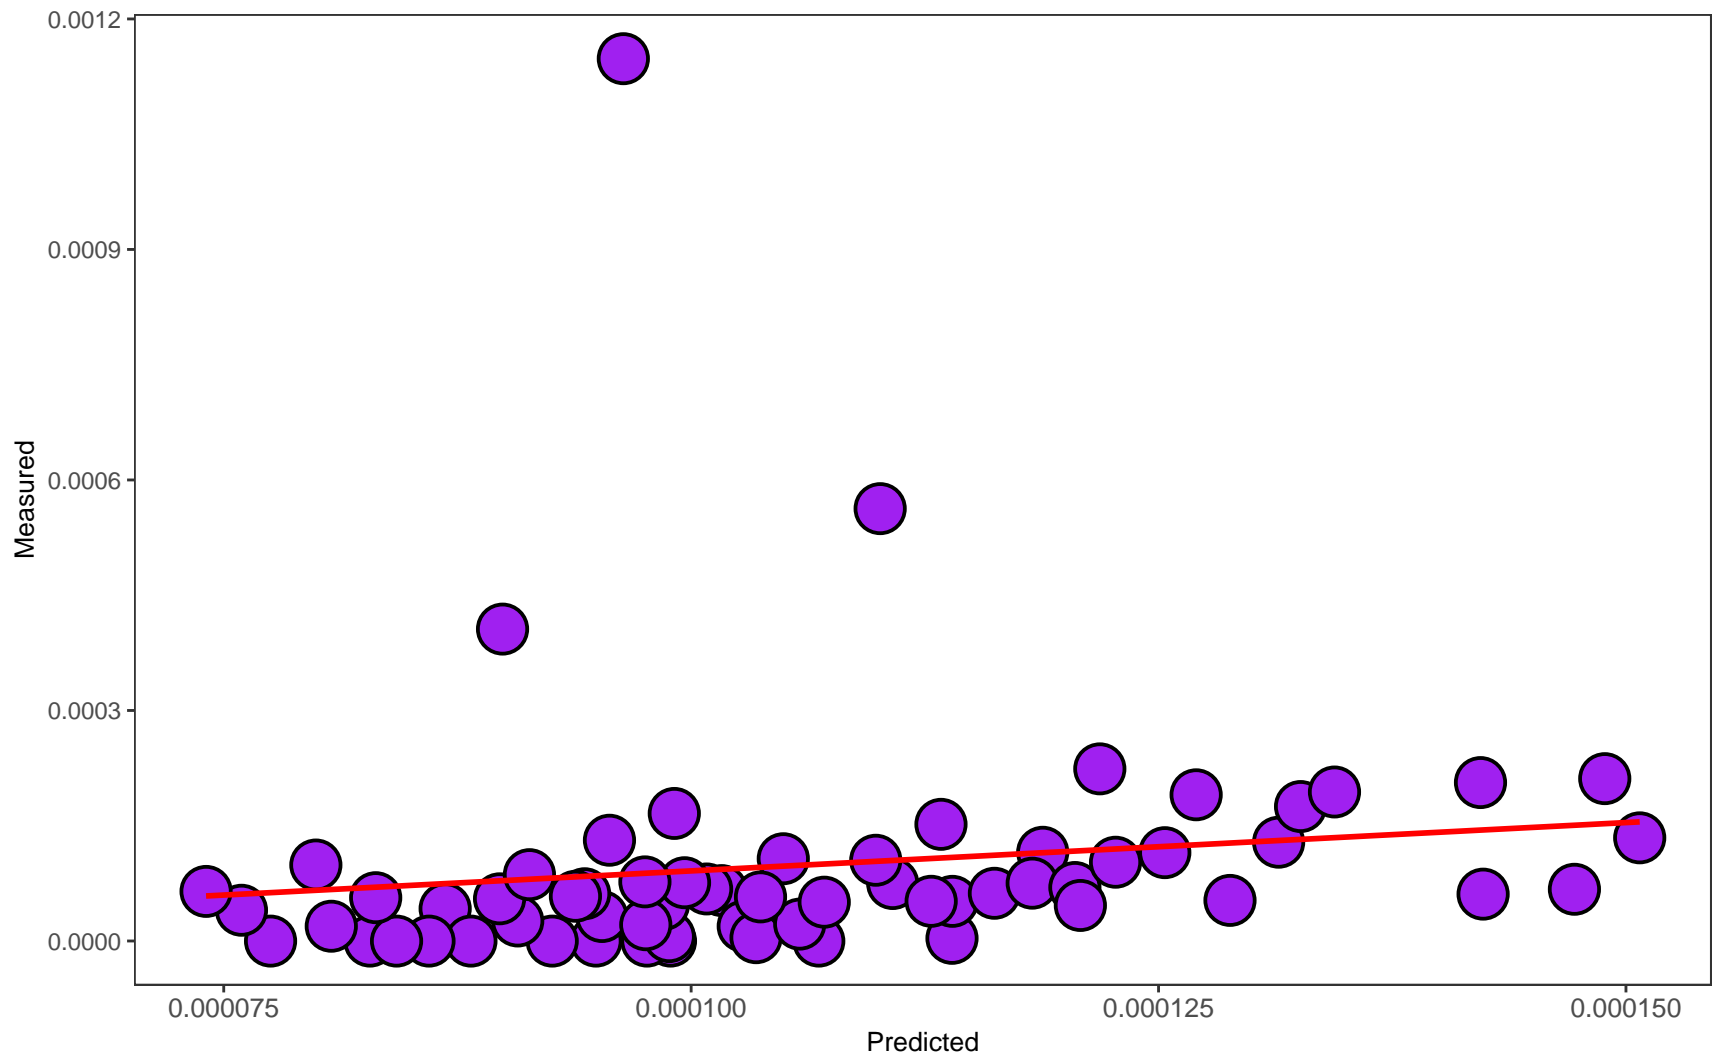

linoleoyl ethanolamide (C8-pos\_Cluster\_1495): Spearman 0.56

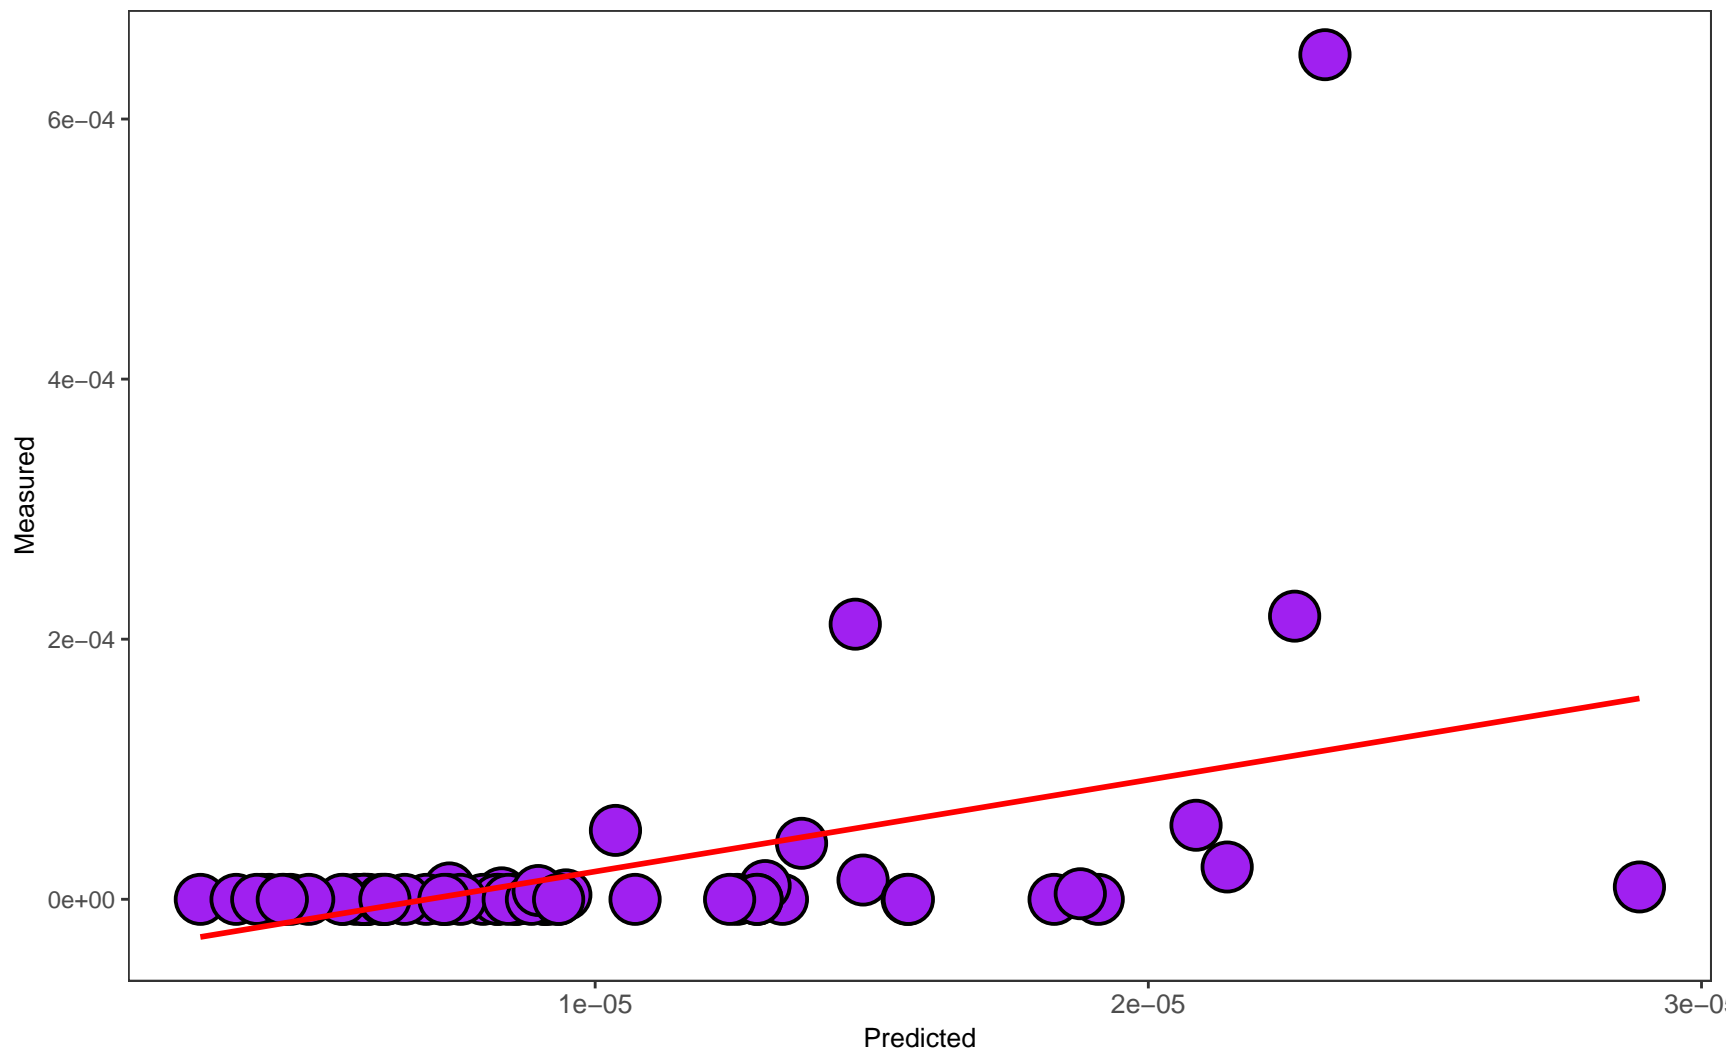

C18:1 CE (C8-pos\_Cluster\_1514): Spearman 0.51

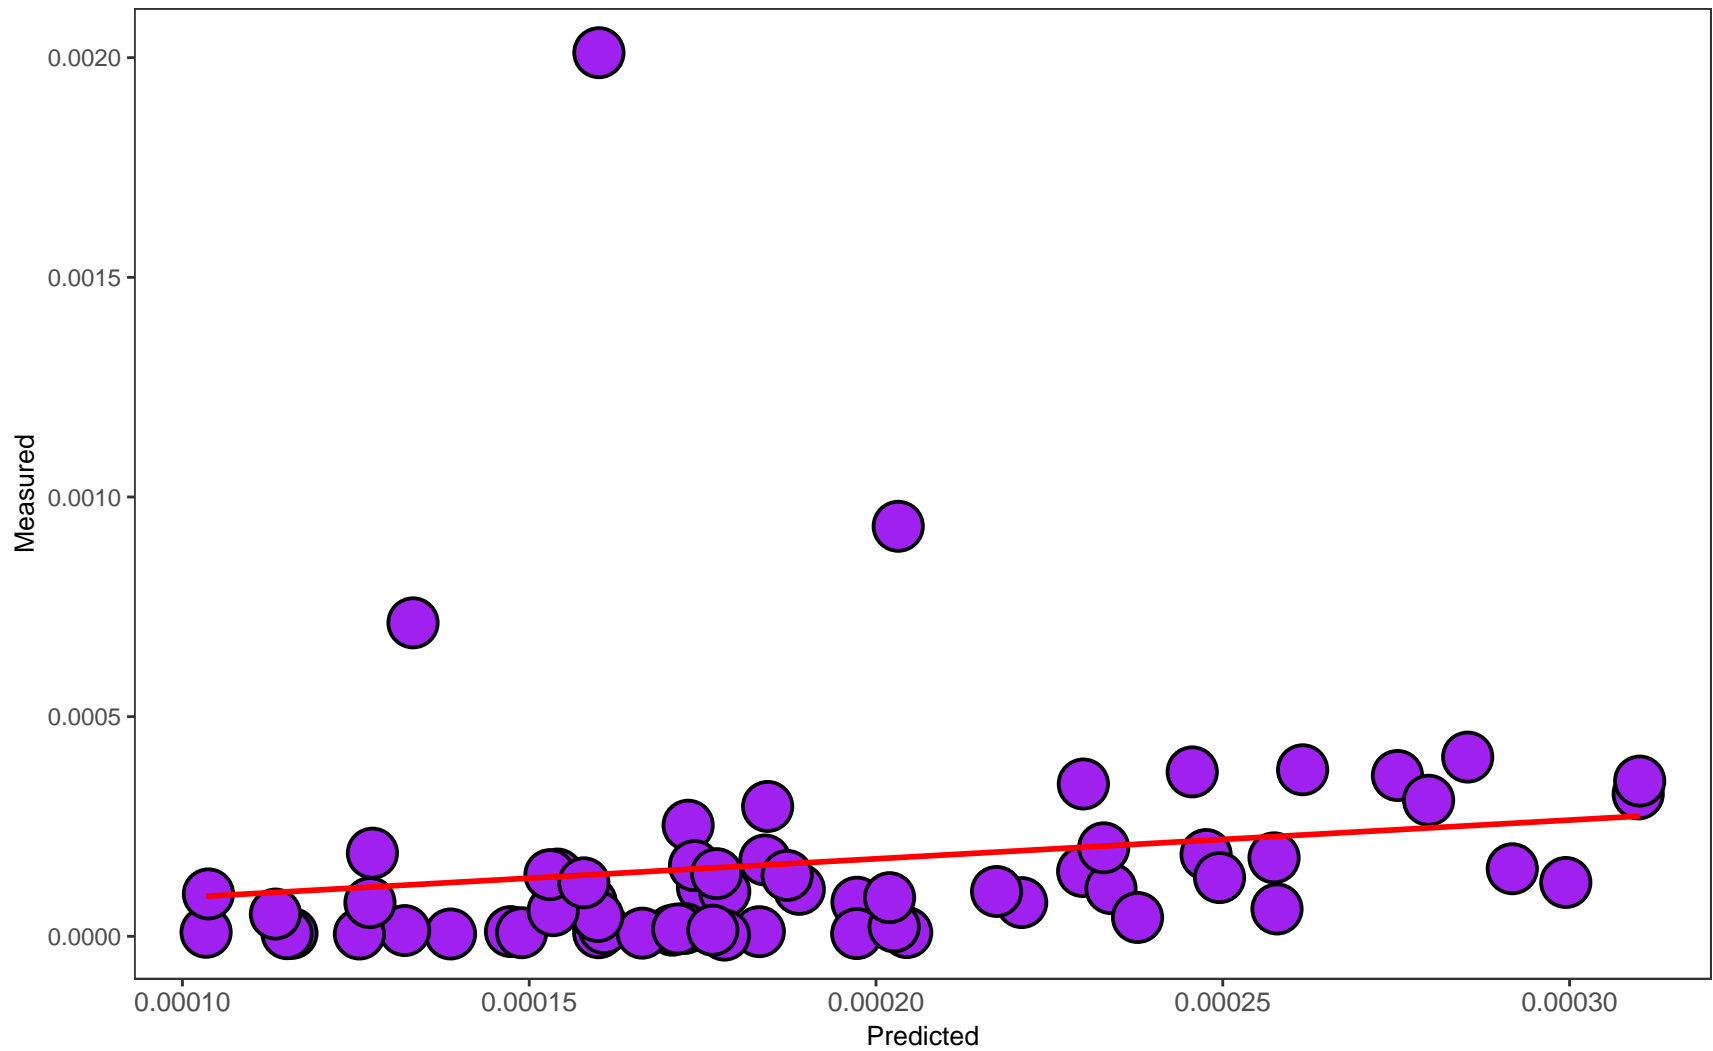

C18:0 SM (C8-pos\_Cluster\_1758): Spearman 0.33

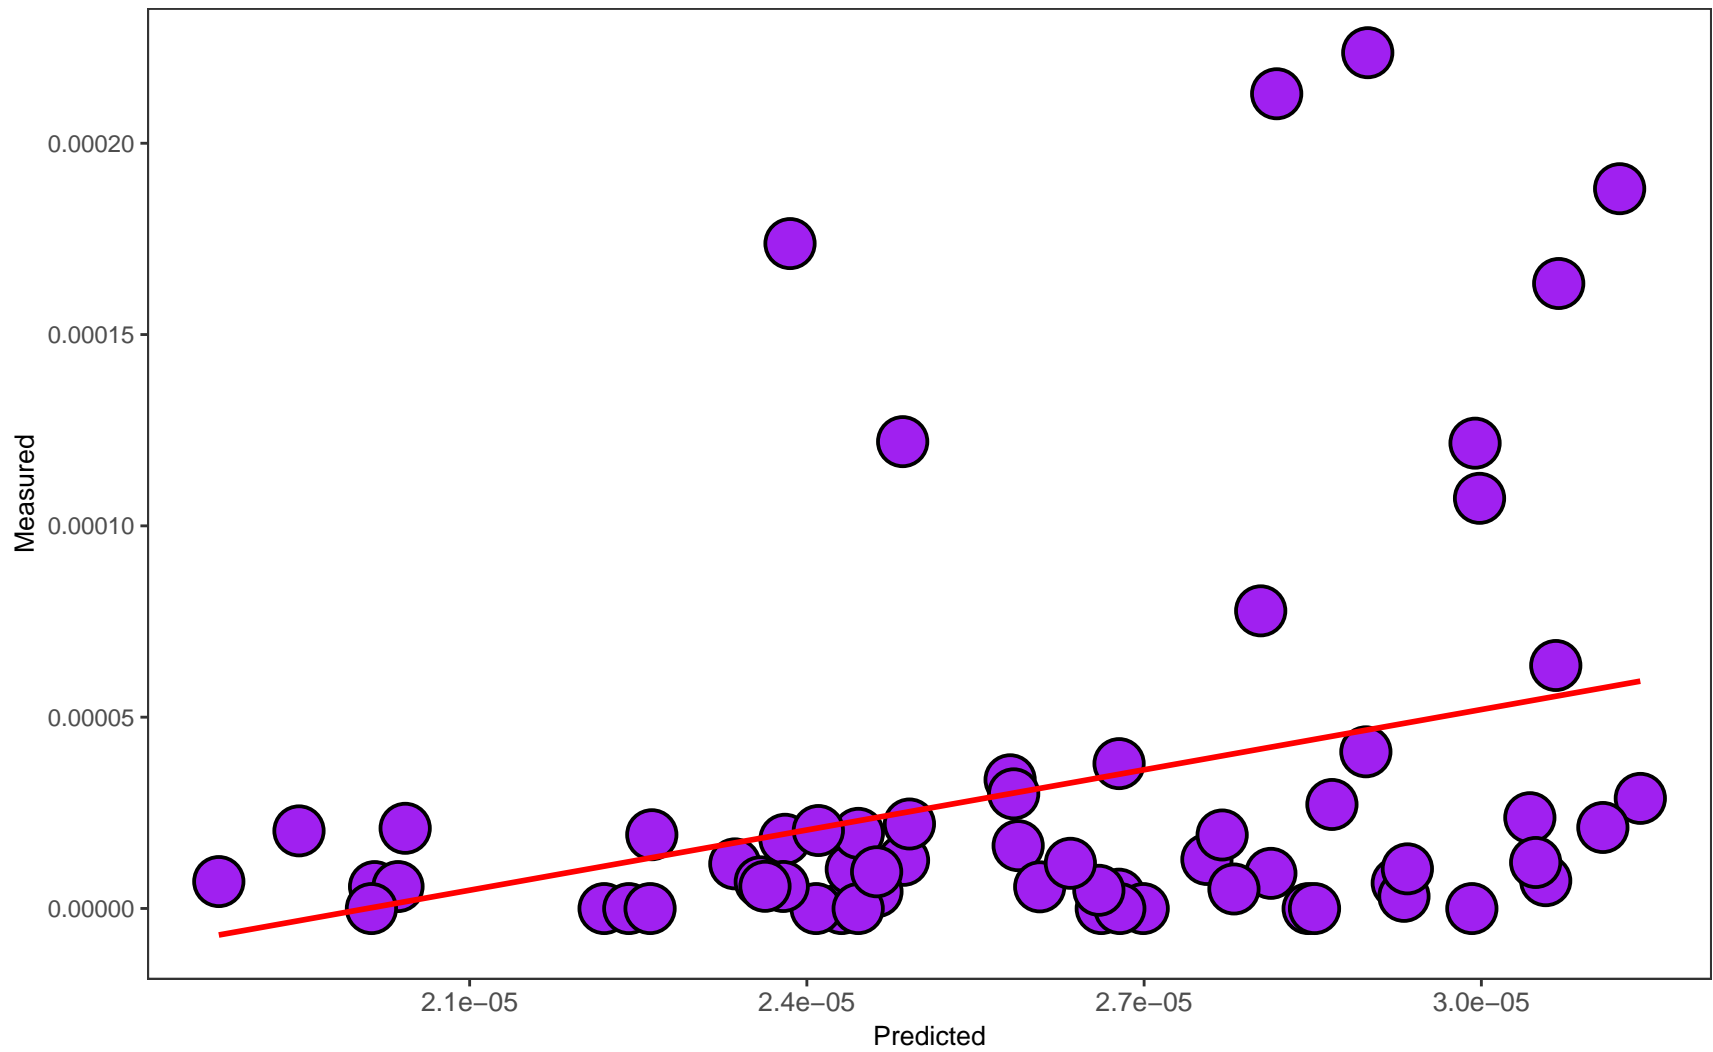

cholestenone (C8-pos\_Cluster\_1900): Spearman 0.49

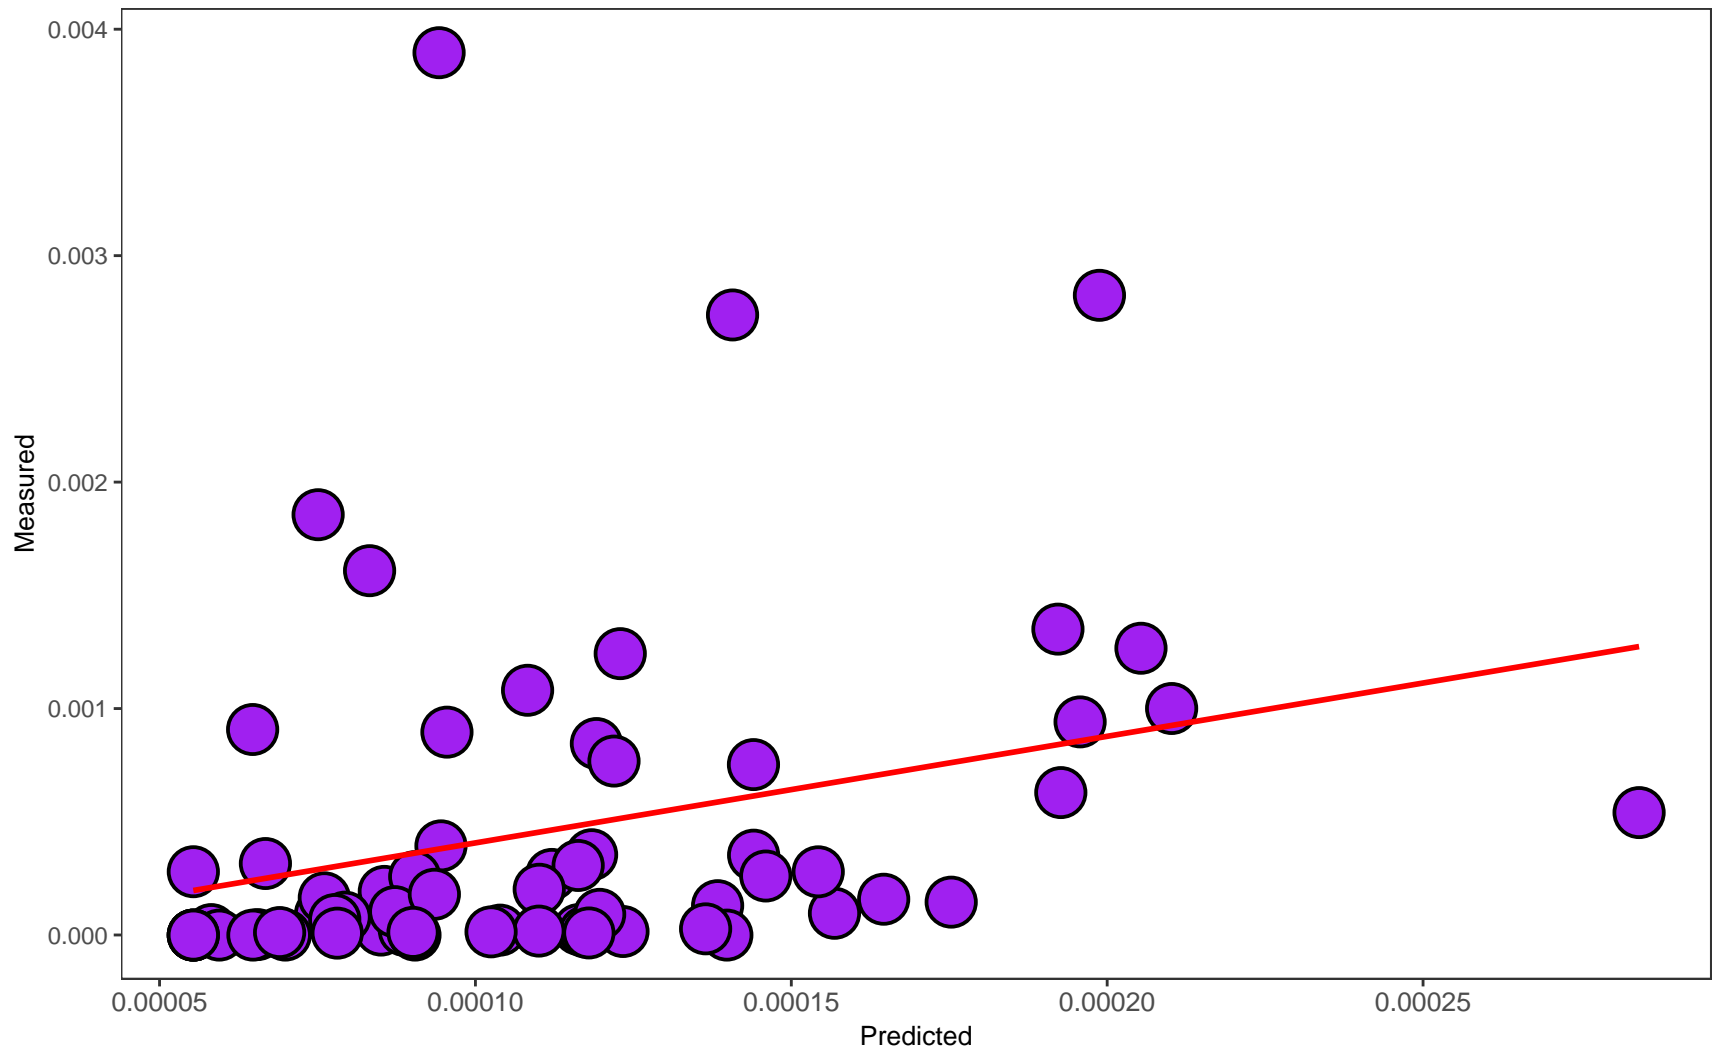

propionate (HILIC-neg\_Cluster\_0003): Spearman 0.42

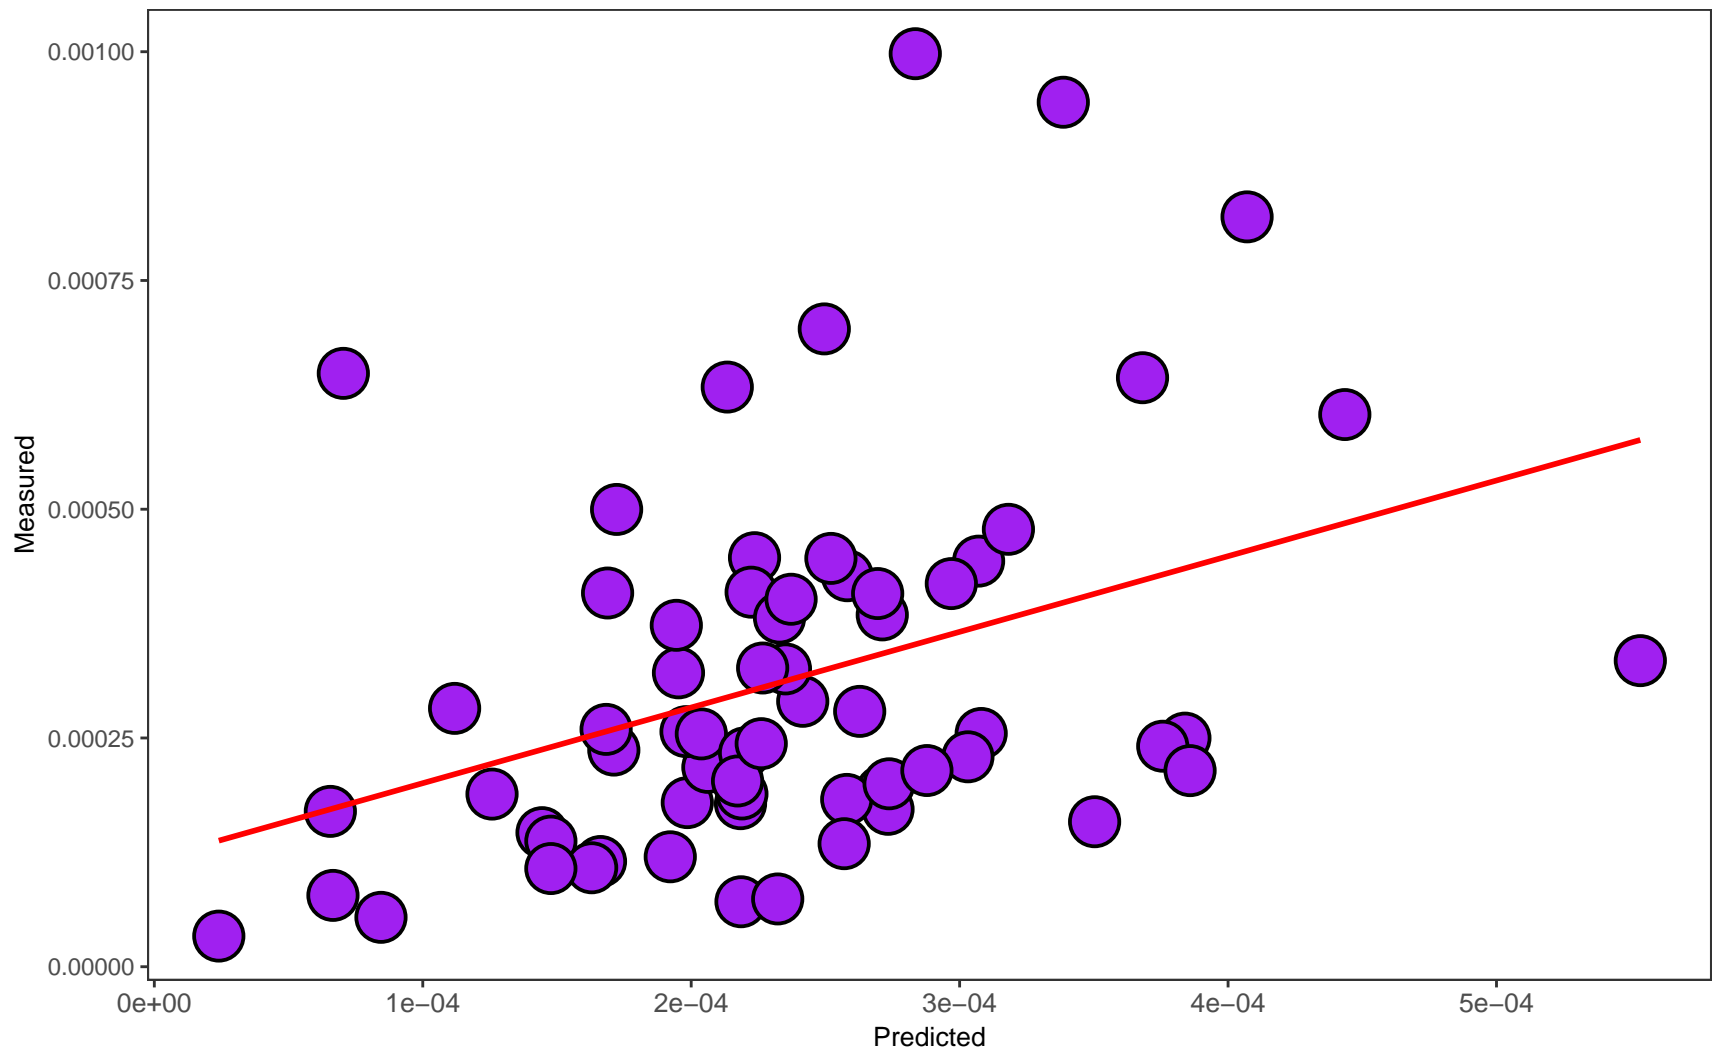

butyrate / isobutyrate\* (HILIC-neg\_Cluster\_0013): Spearman 0.46

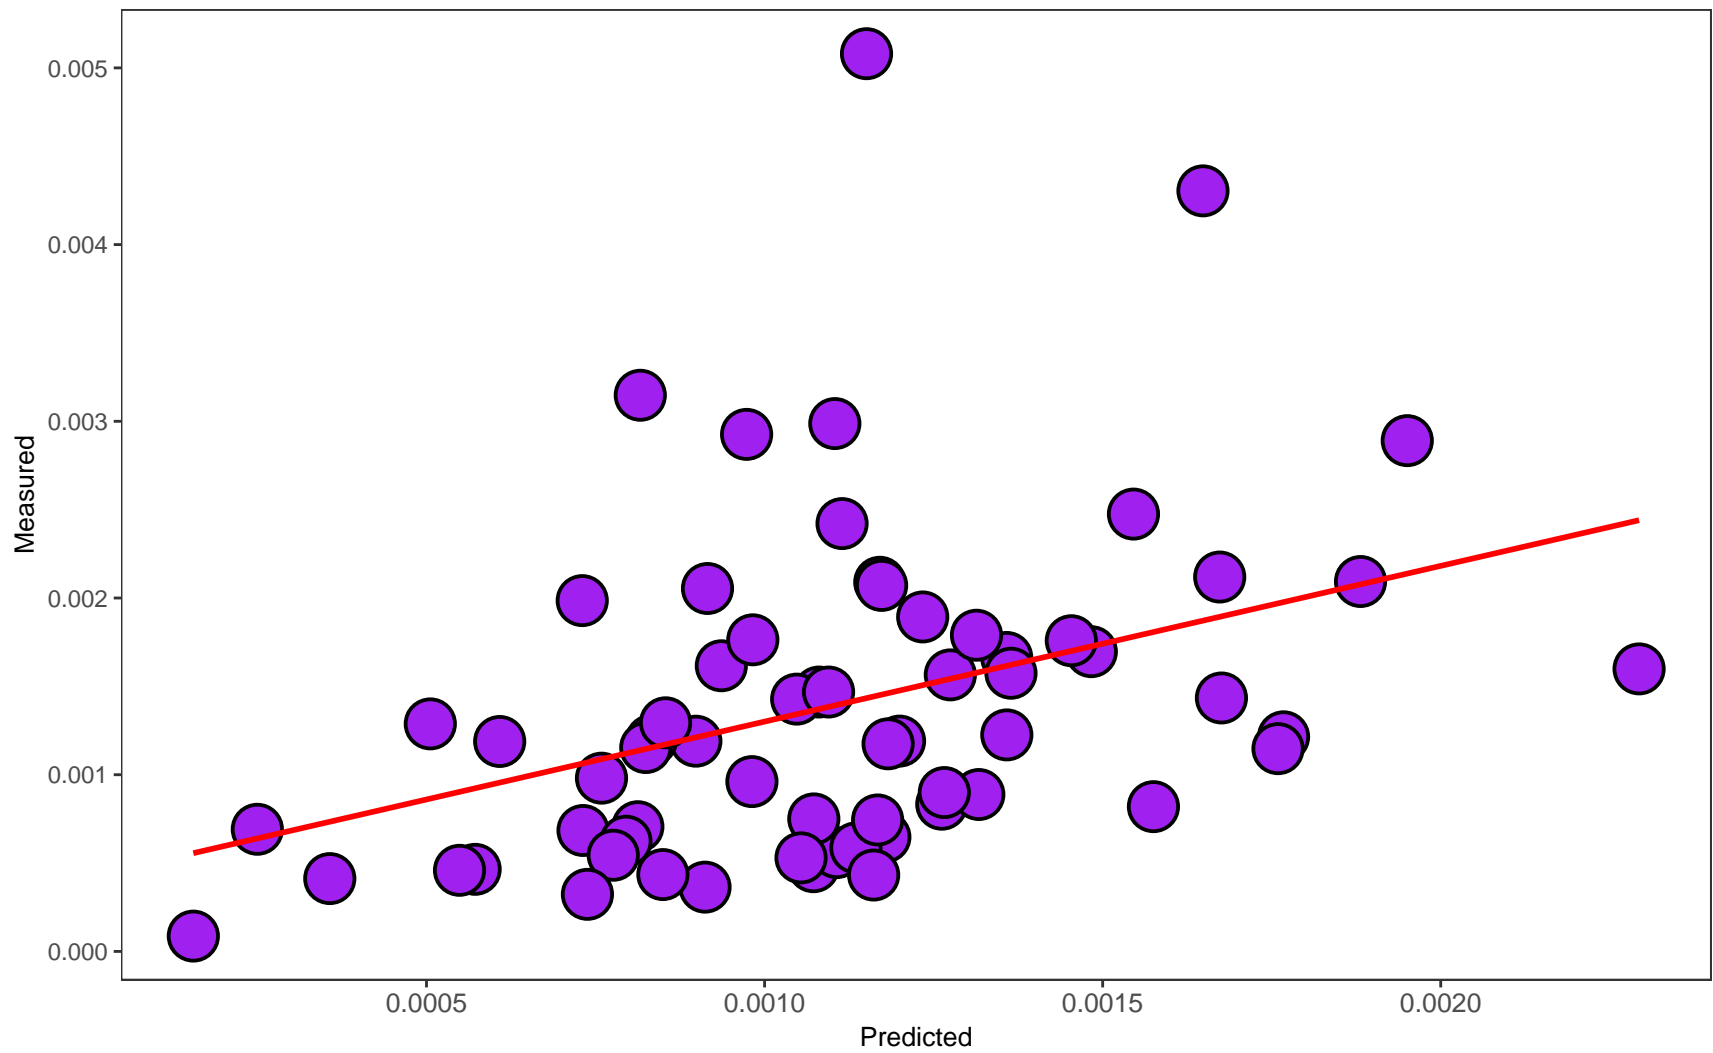



methylbutyric acid / valeric / isovaleric\* (HILIC-neg\_Cluster\_0030): Spearman 0.37

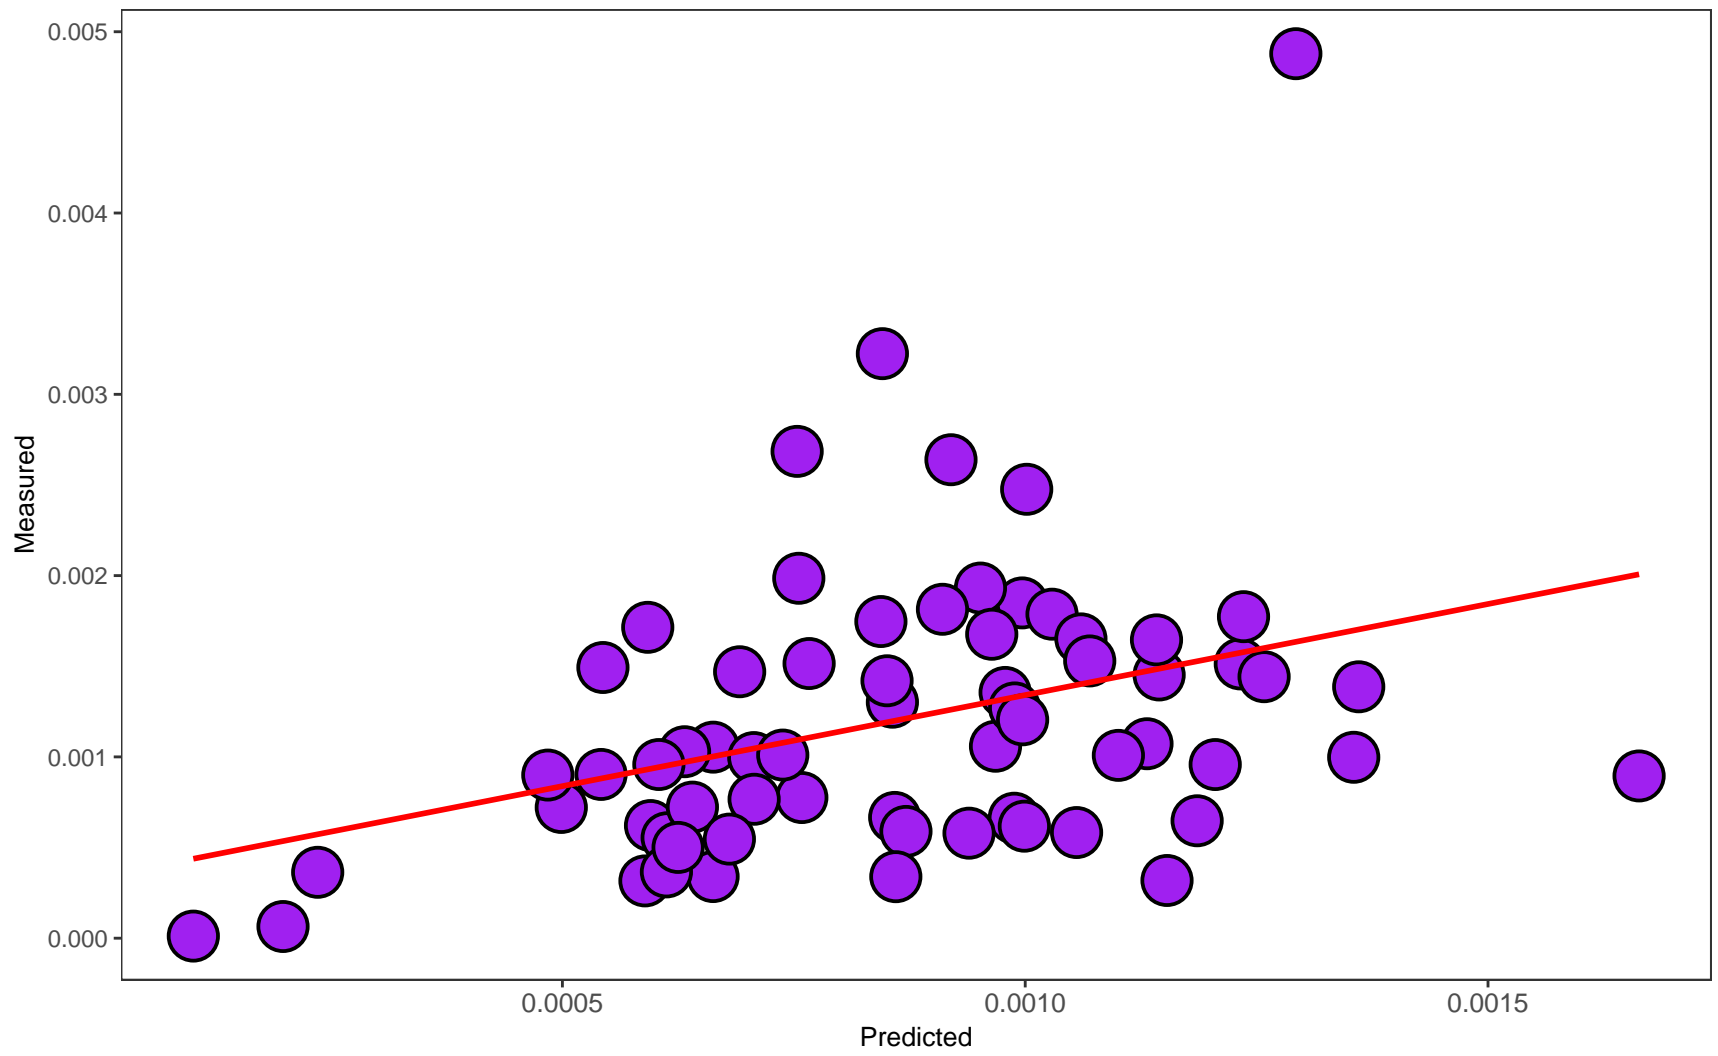

malonate (HILIC-neg\_Cluster\_0033): Spearman 0.39

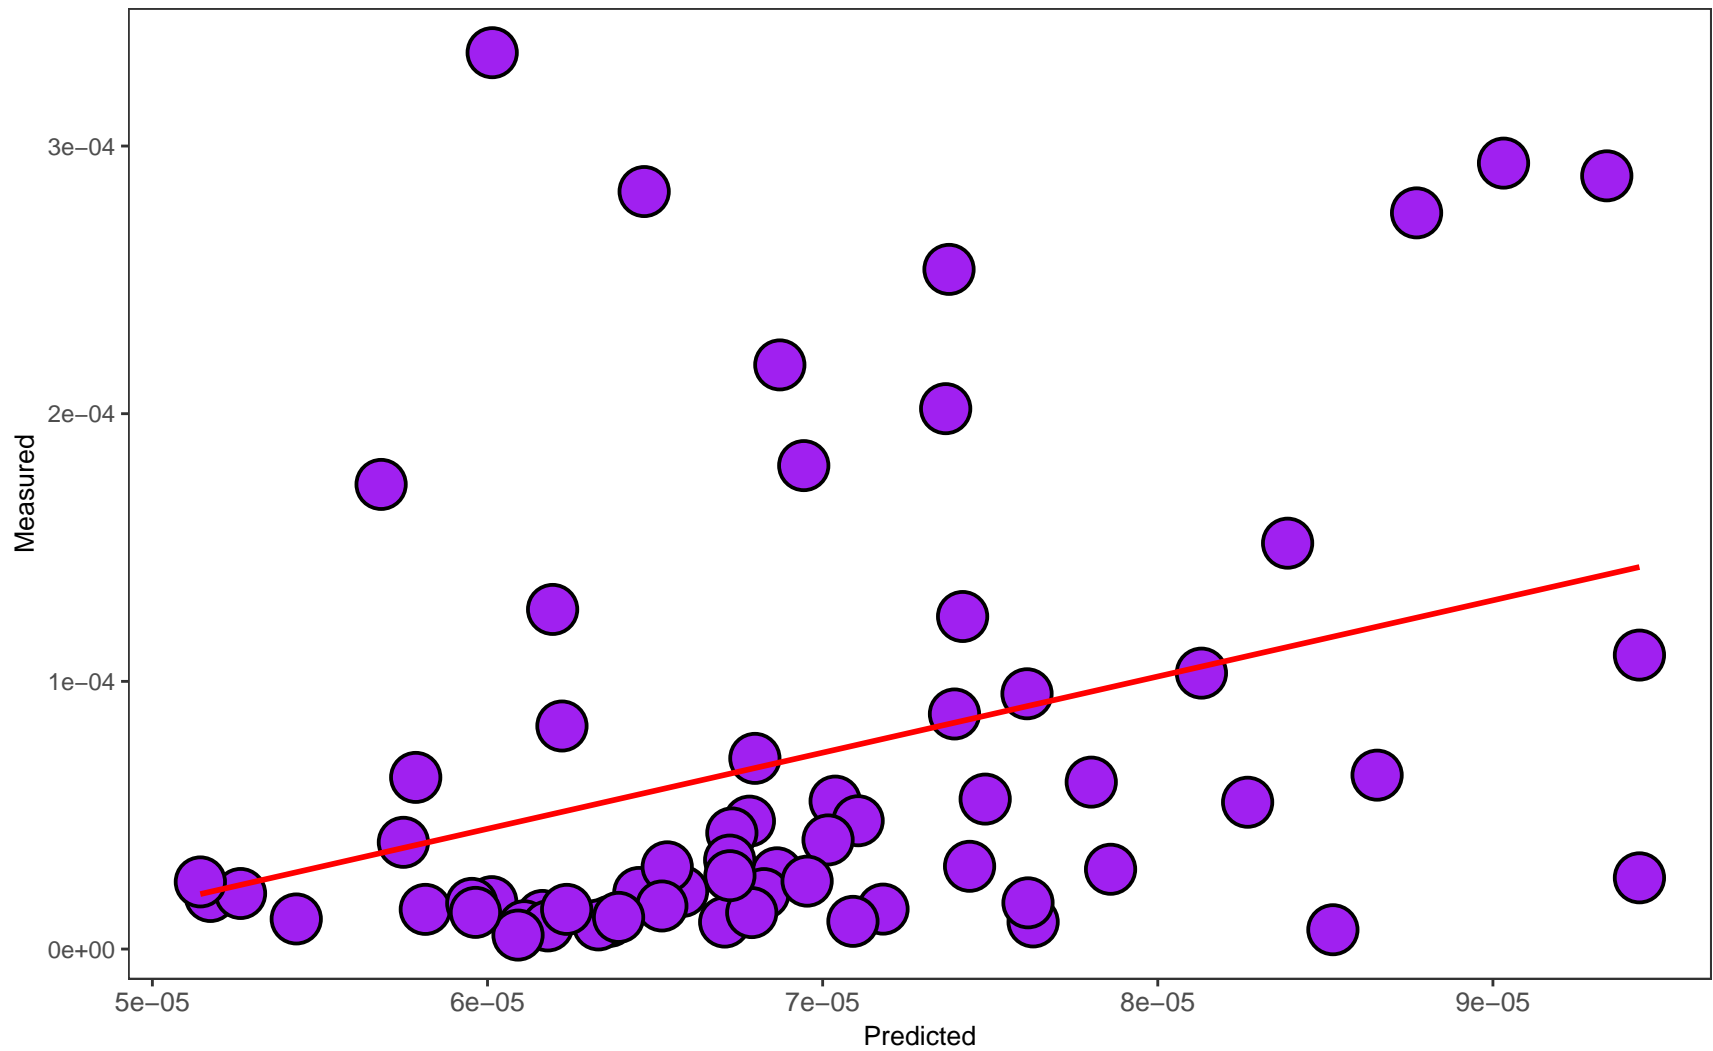

uracil (HILIC-neg\_Cluster\_0049): Spearman 0.45

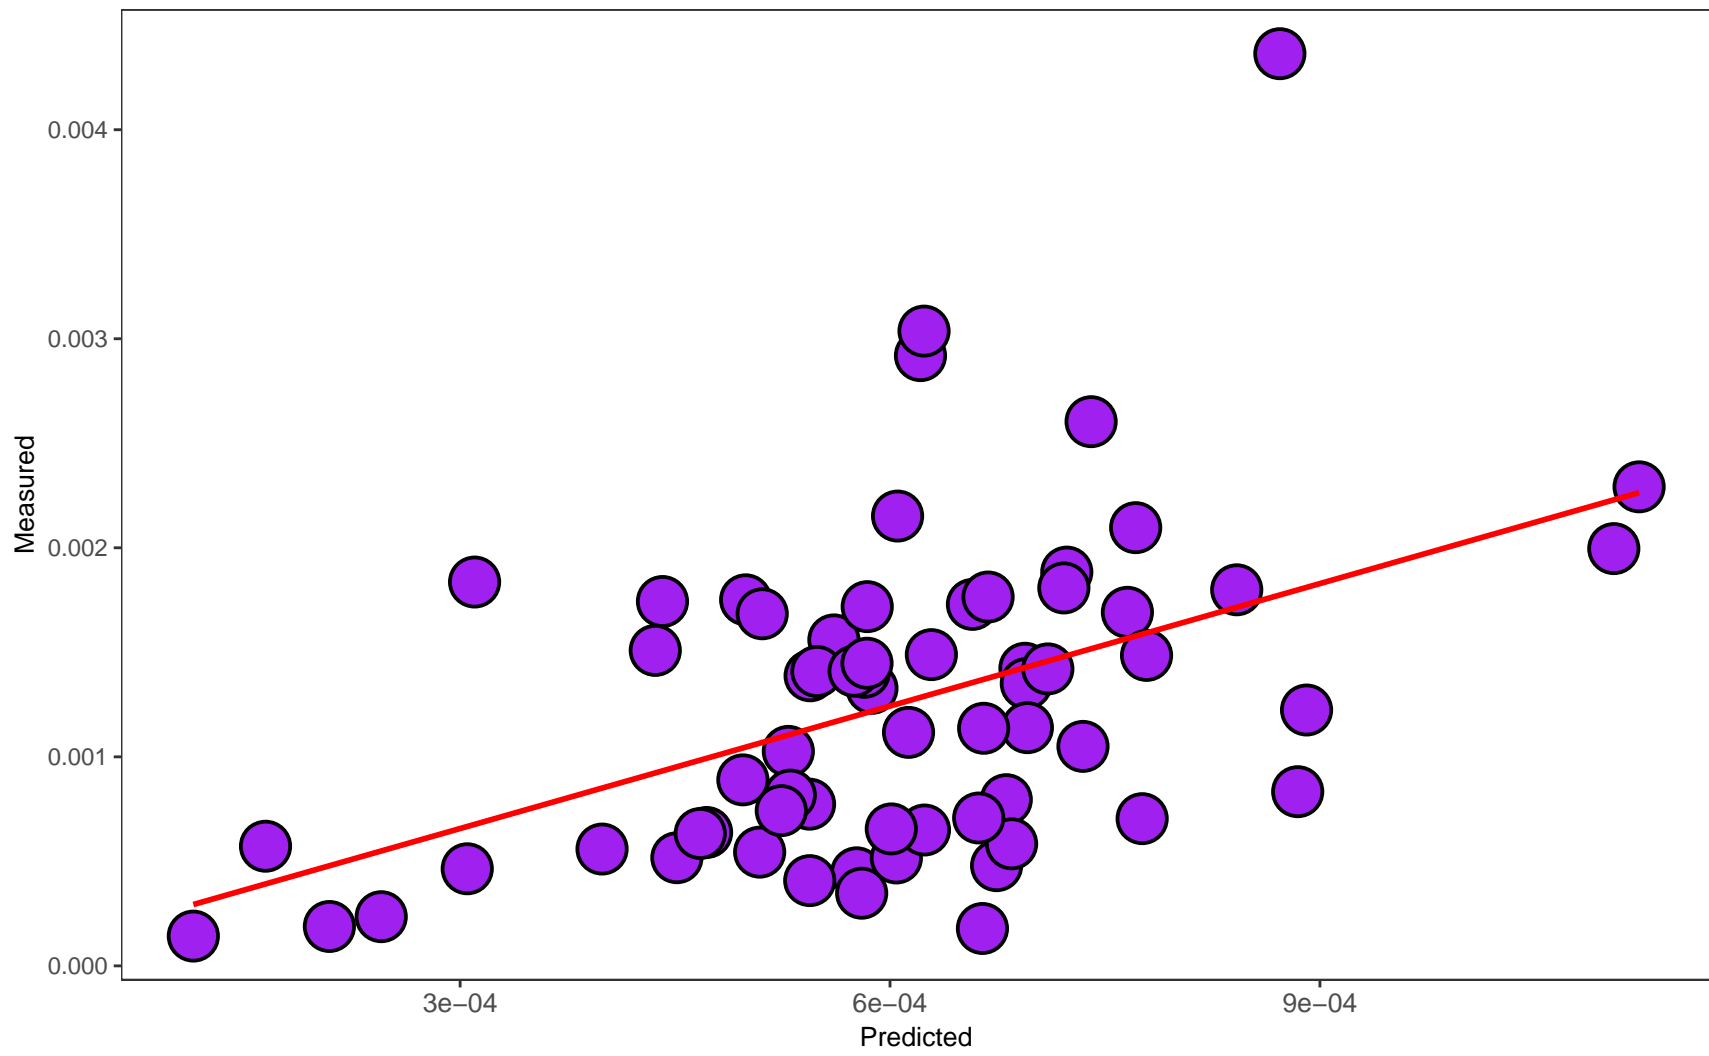

caproic acid (HILIC-neg\_Cluster\_0064): Spearman 0.51

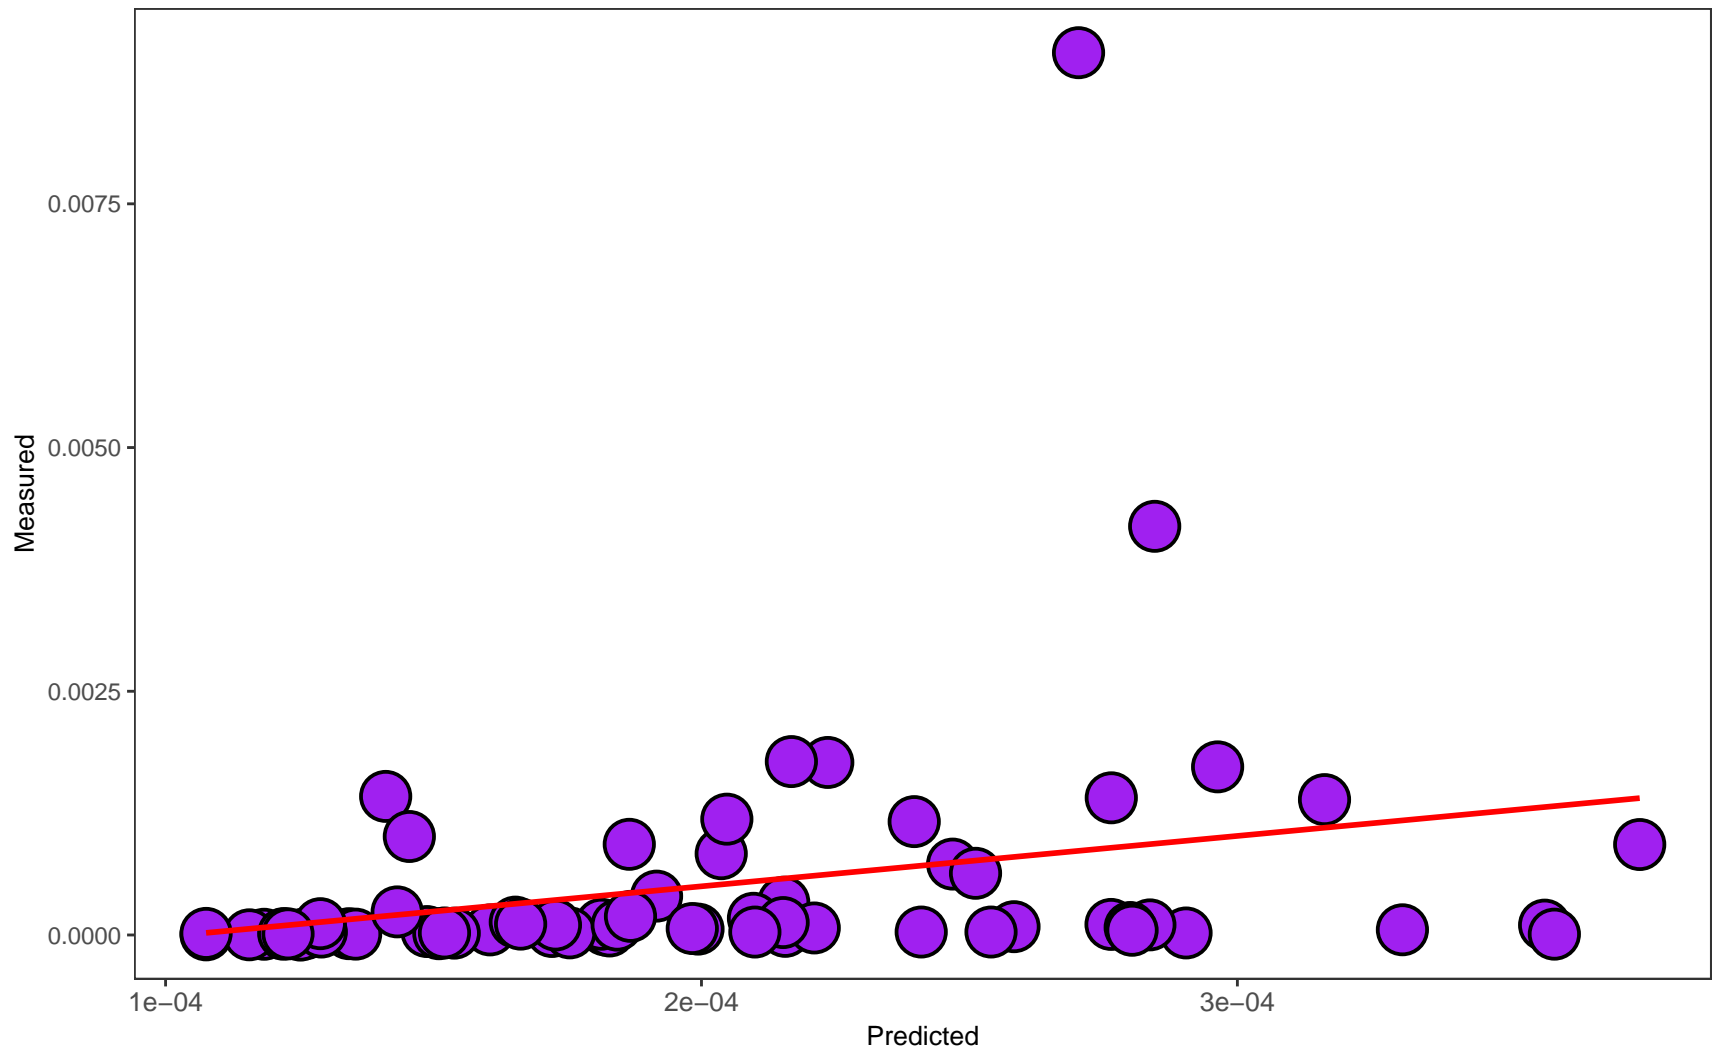

nicotinate (HILIC-neg\_Cluster\_0082): Spearman 0.46

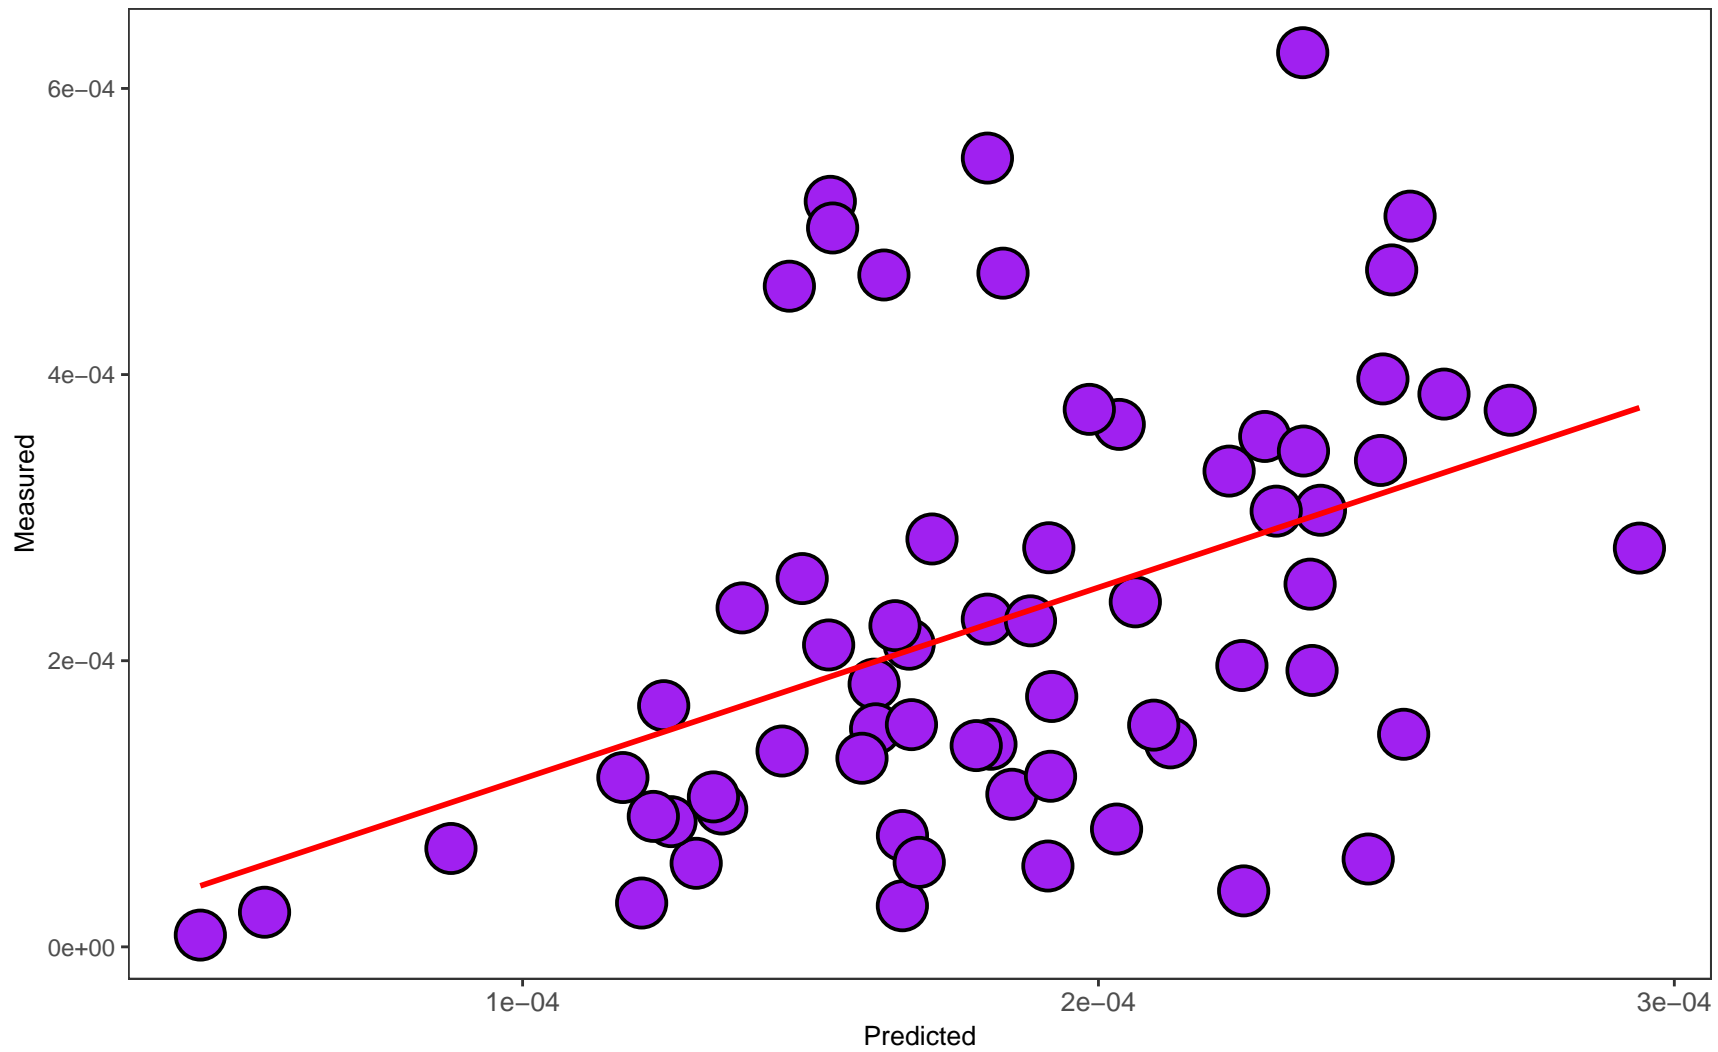

taurine (HILIC-neg\_Cluster\_0085): Spearman 0.34

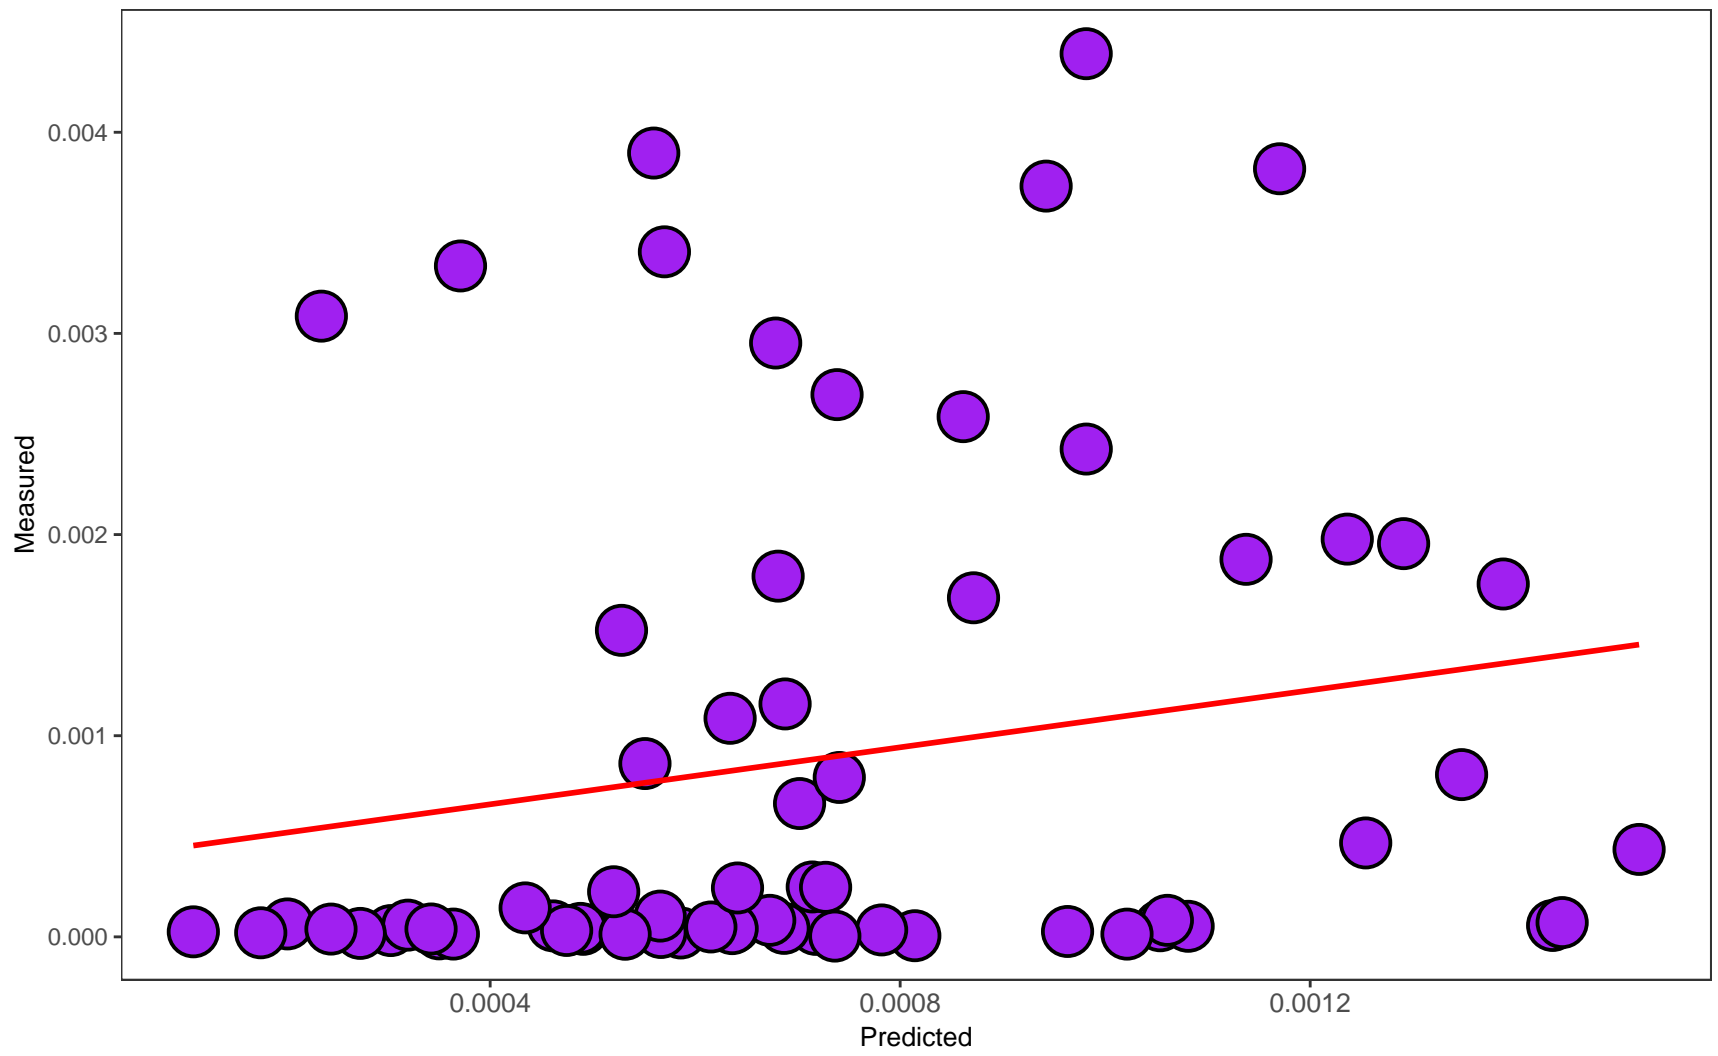

thymine (HILIC-neg\_Cluster\_0087): Spearman 0.54

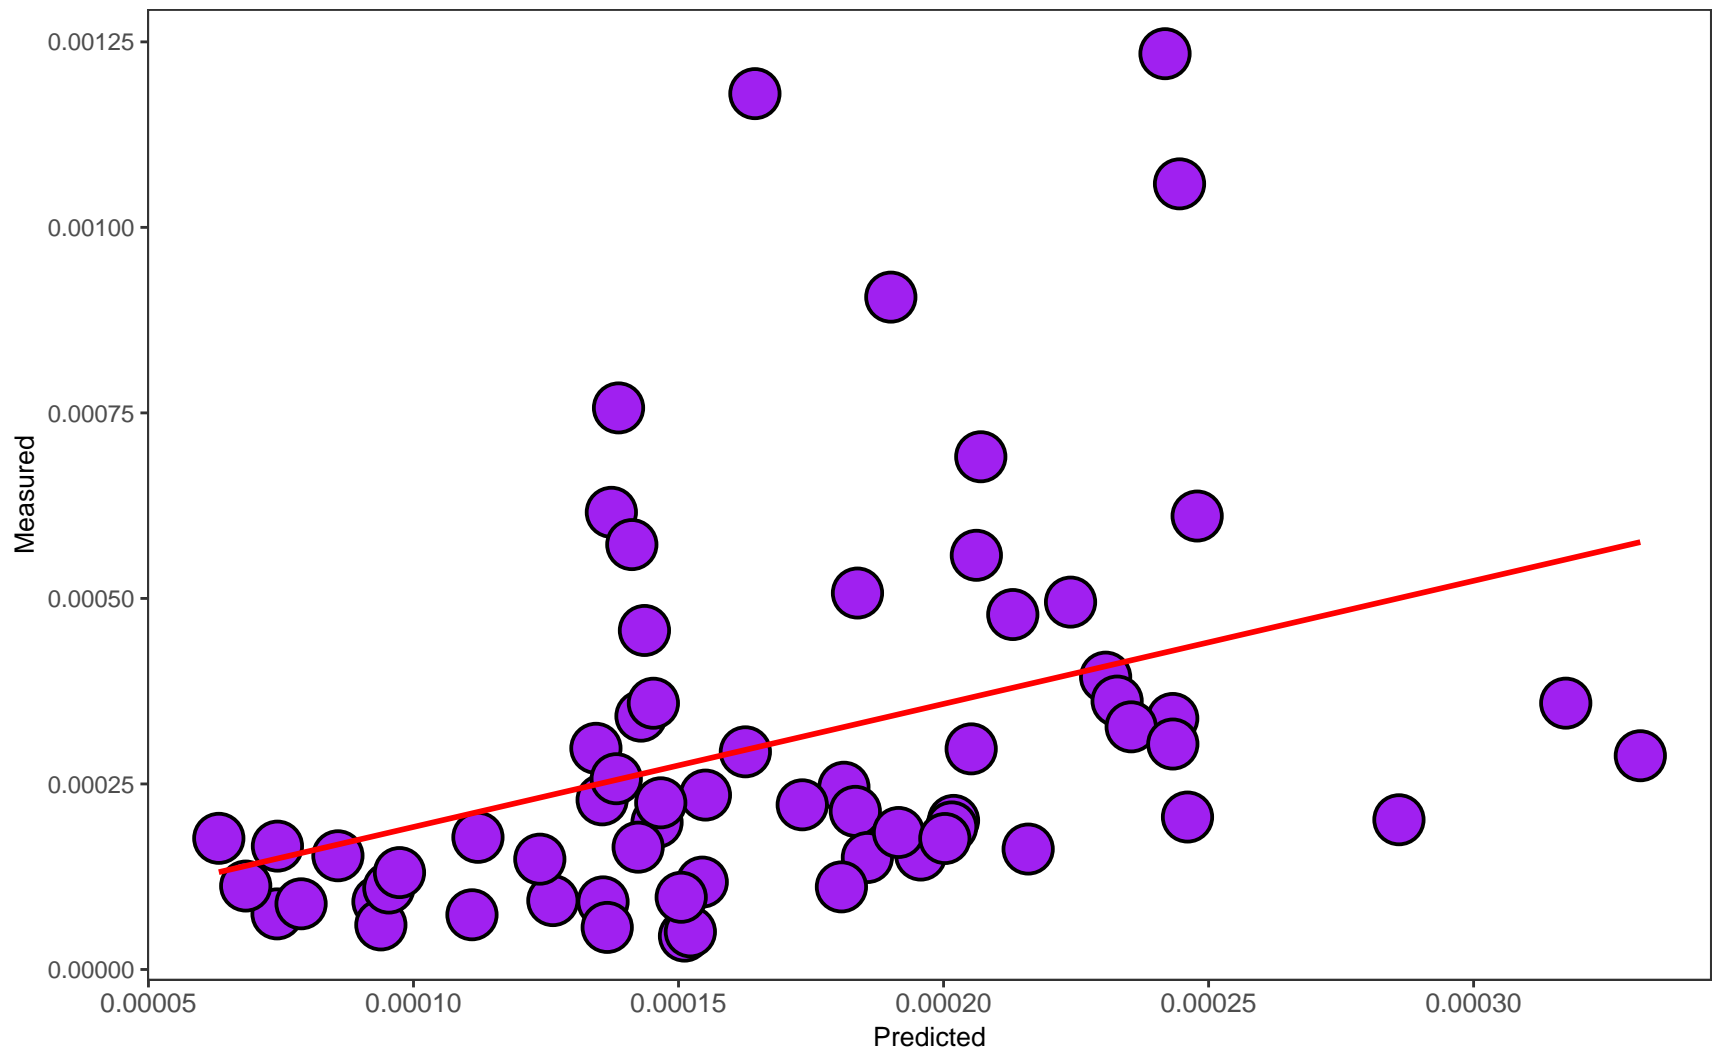

erythronic acid (HILIC-neg\_Cluster\_0122): Spearman 0.44

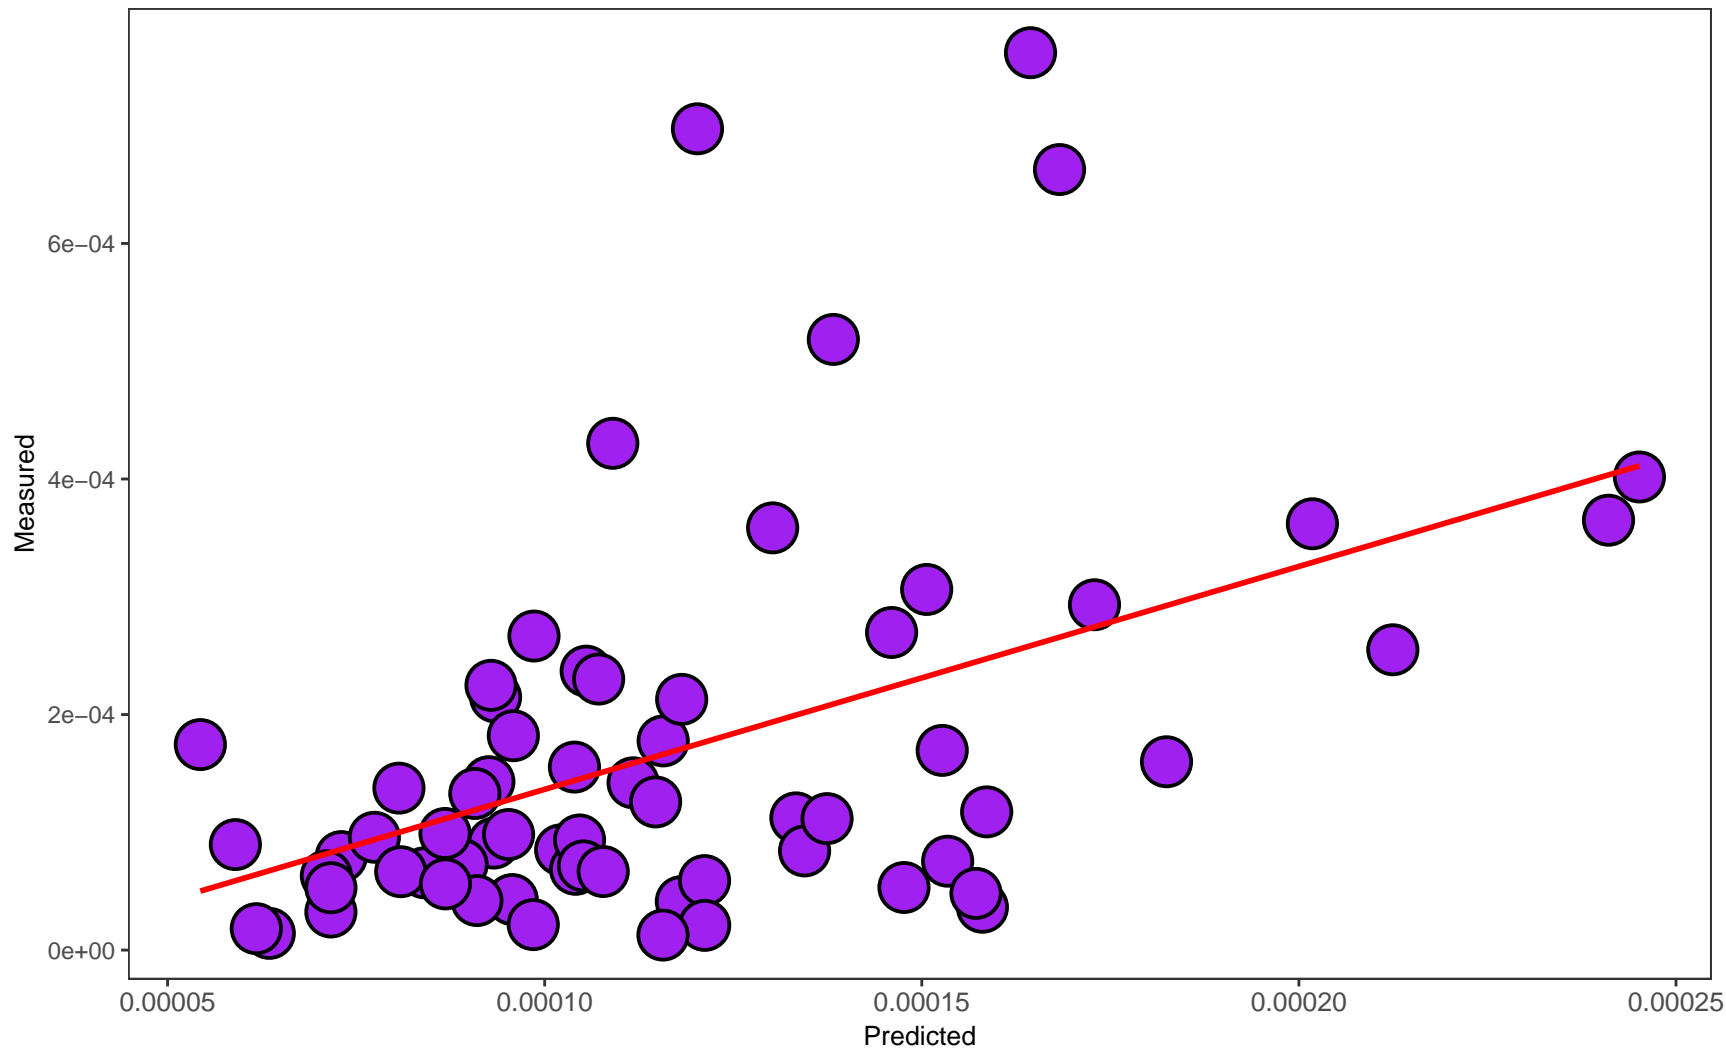



hypoxanthine (HILIC-neg\_Cluster\_0123): Spearman 0.44

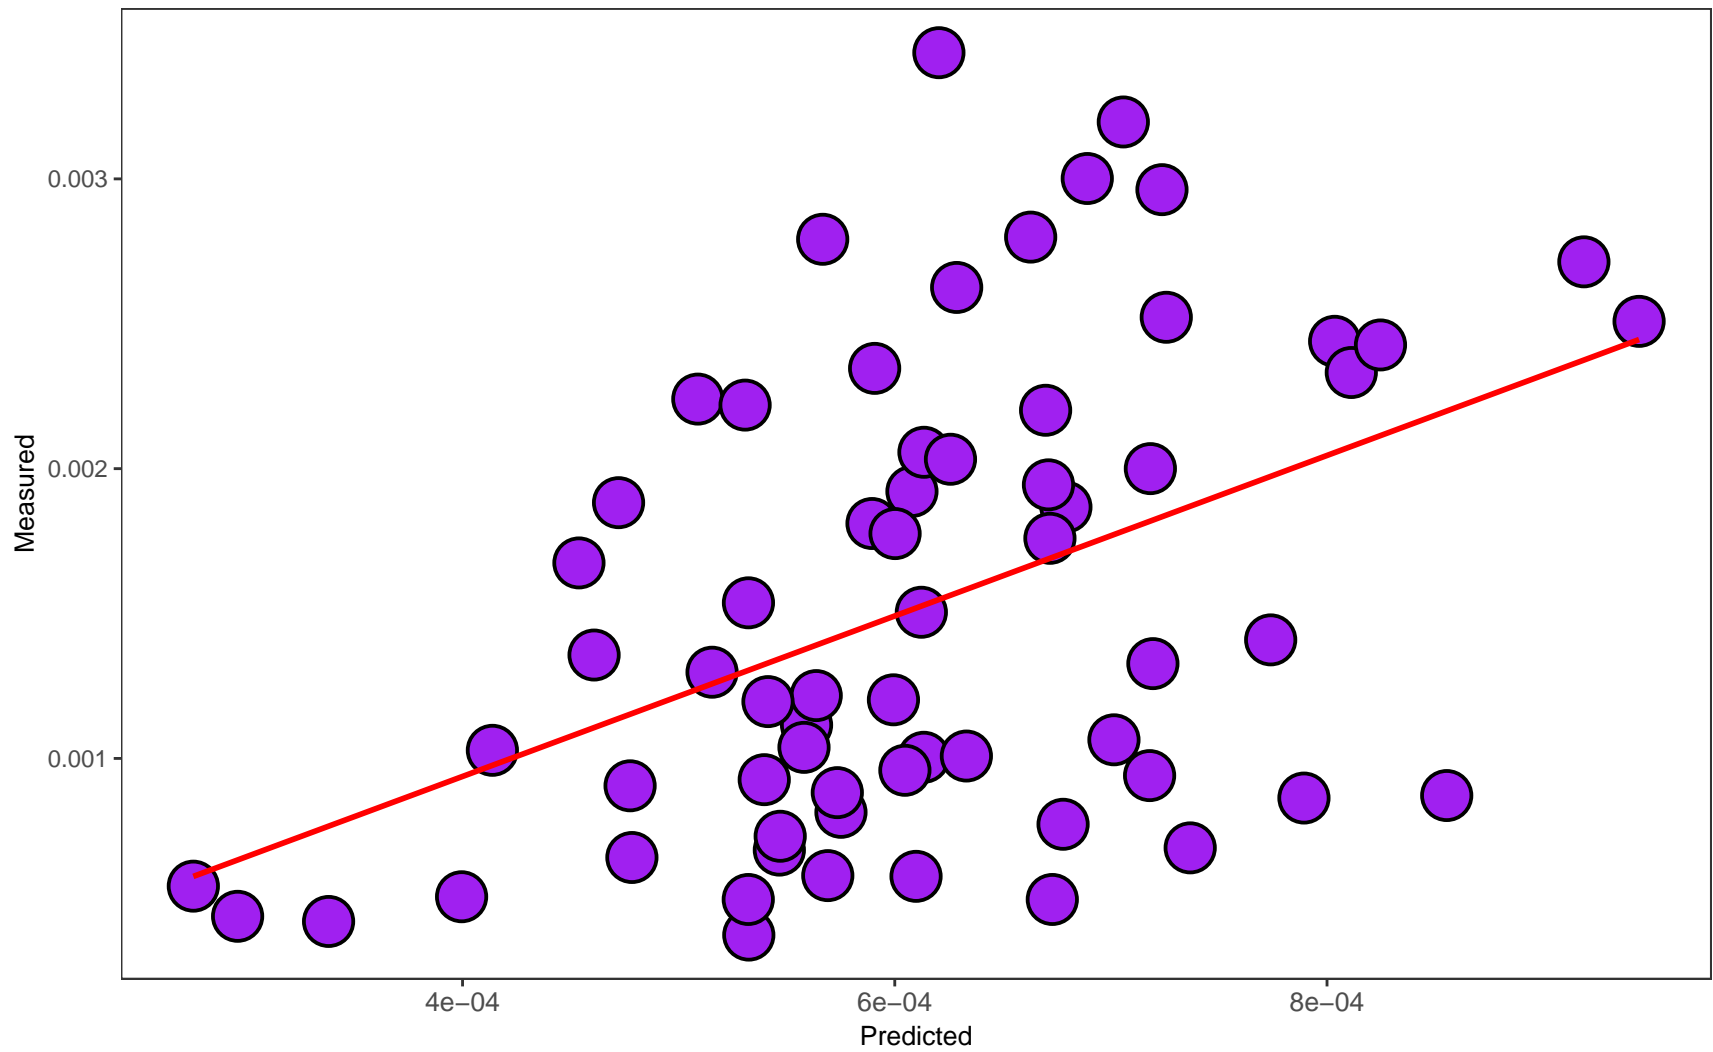

phenylacetate (HILIC-neg\_Cluster\_0125): Spearman 0.35

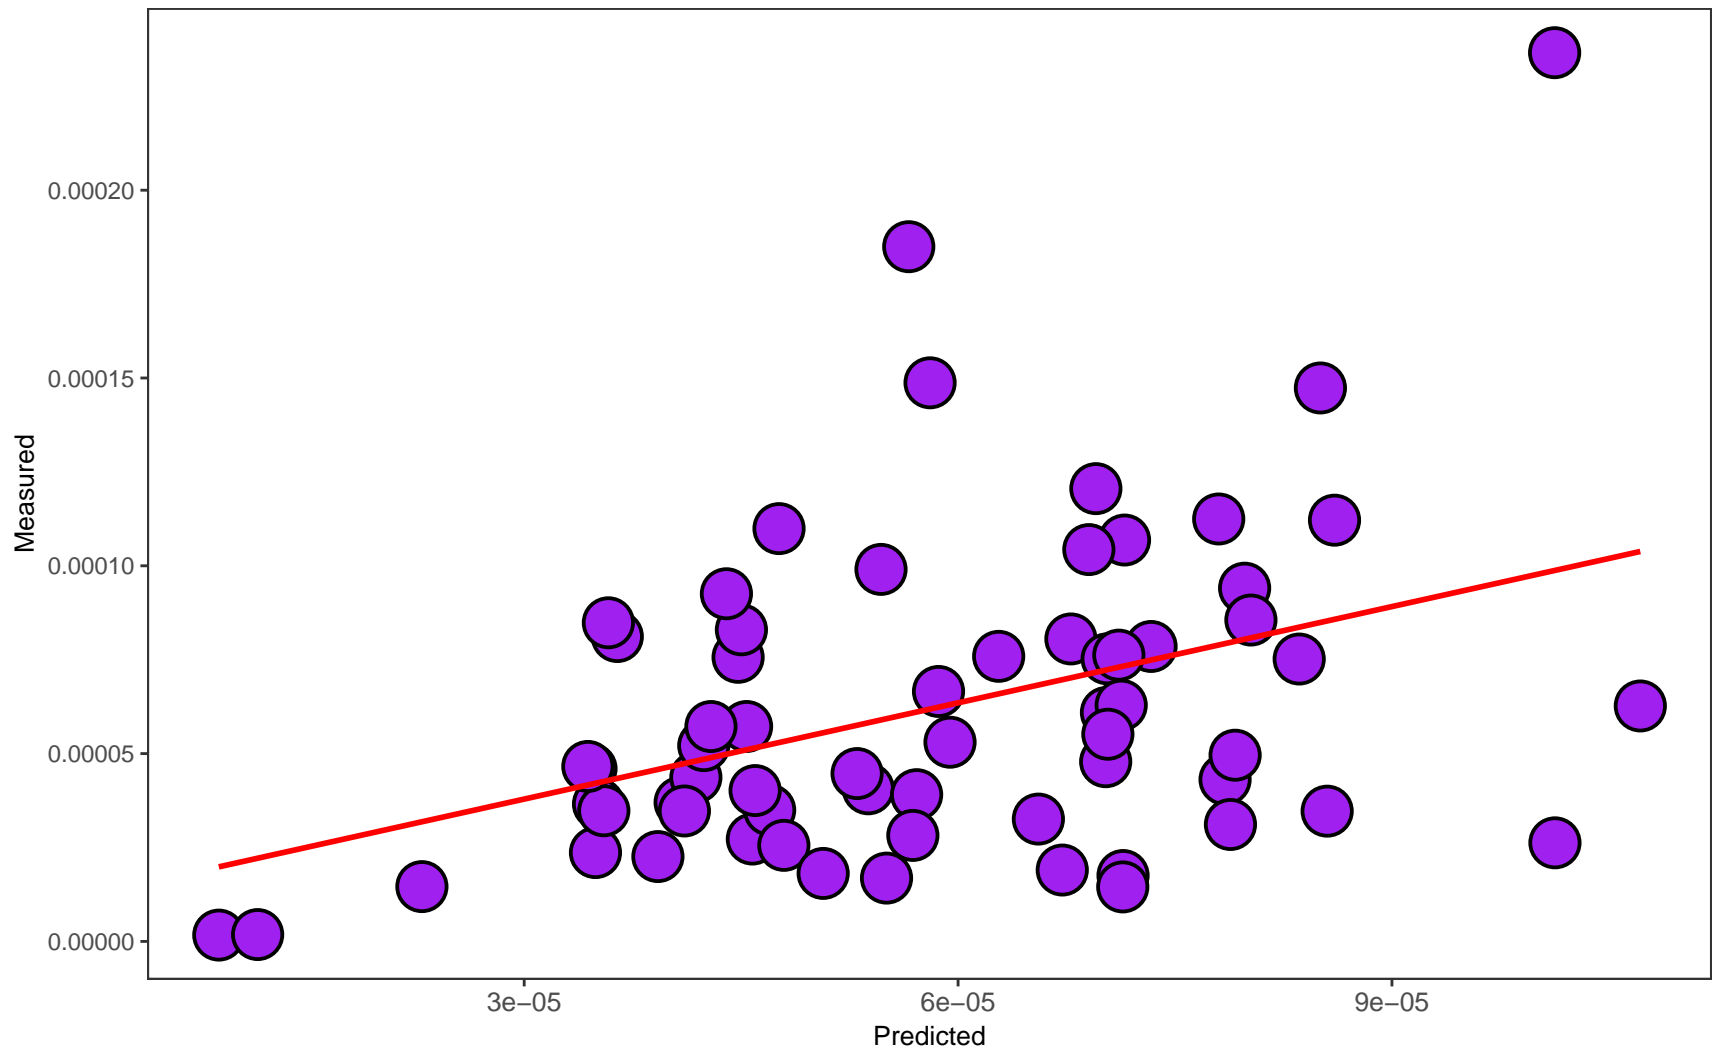

glutamate (HILIC-neg\_Cluster\_0166): Spearman 0.46

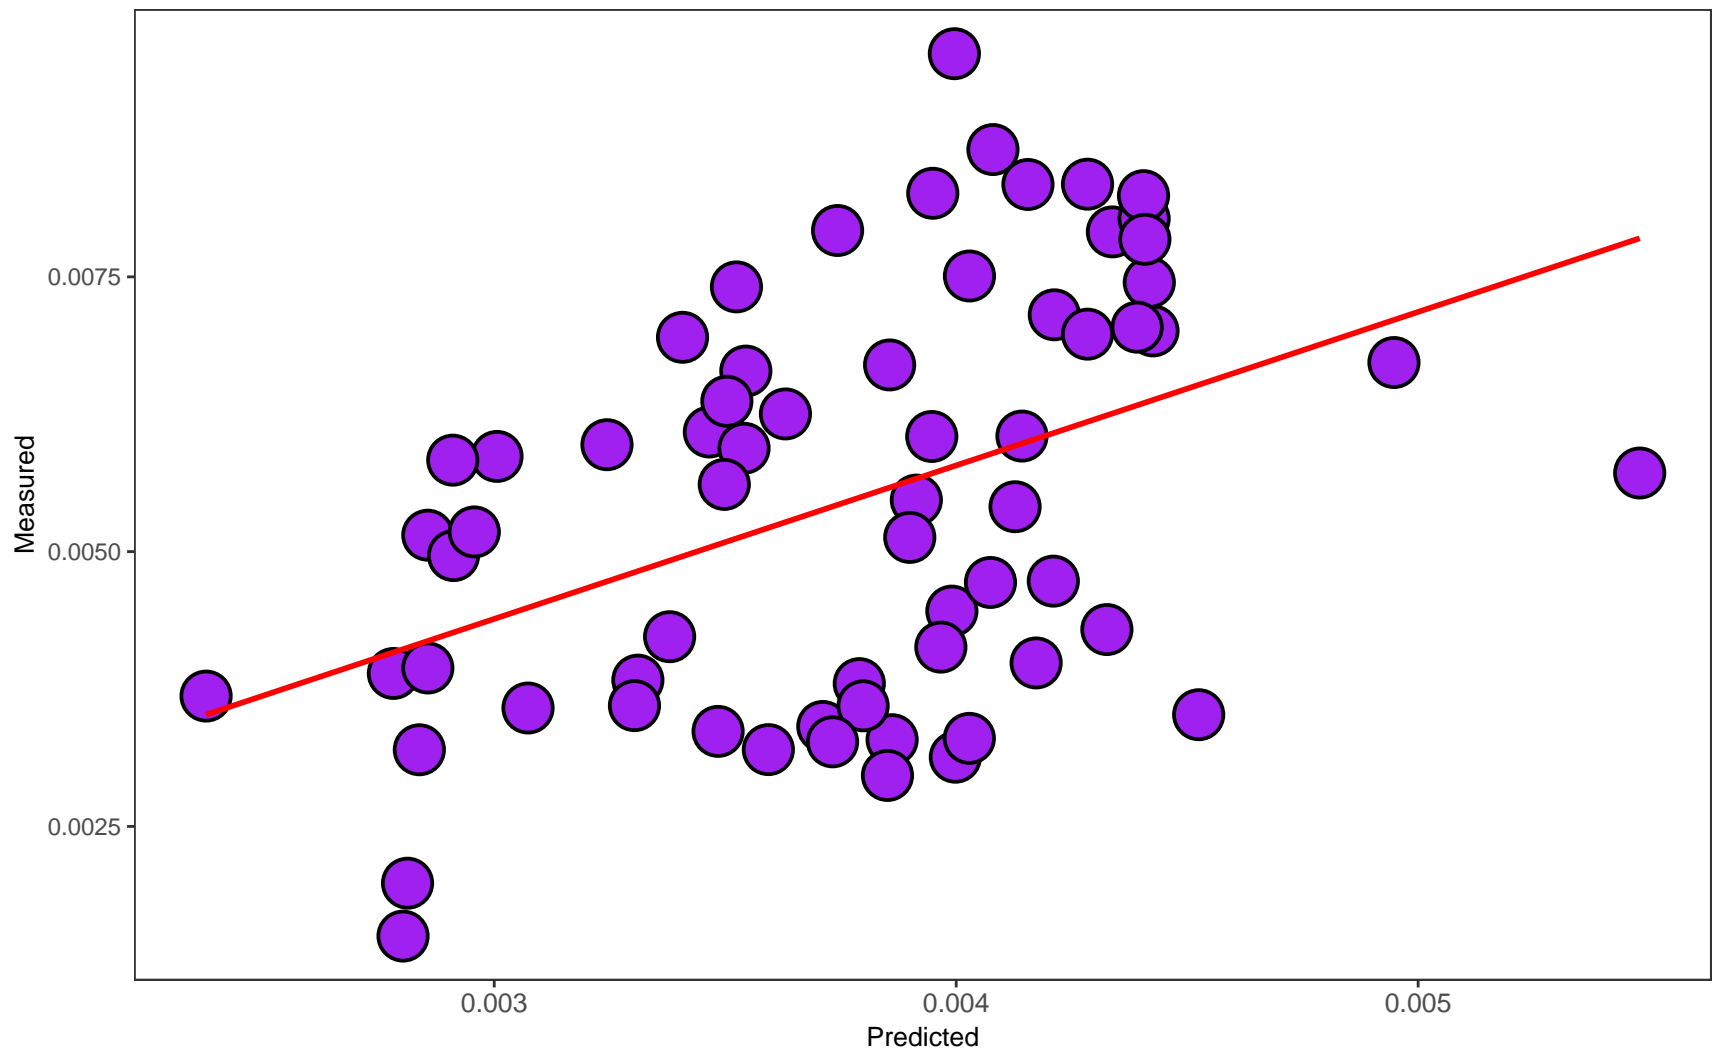

hydrocinnamic acid (HILIC-neg\_Cluster\_0181): Spearman 0.44

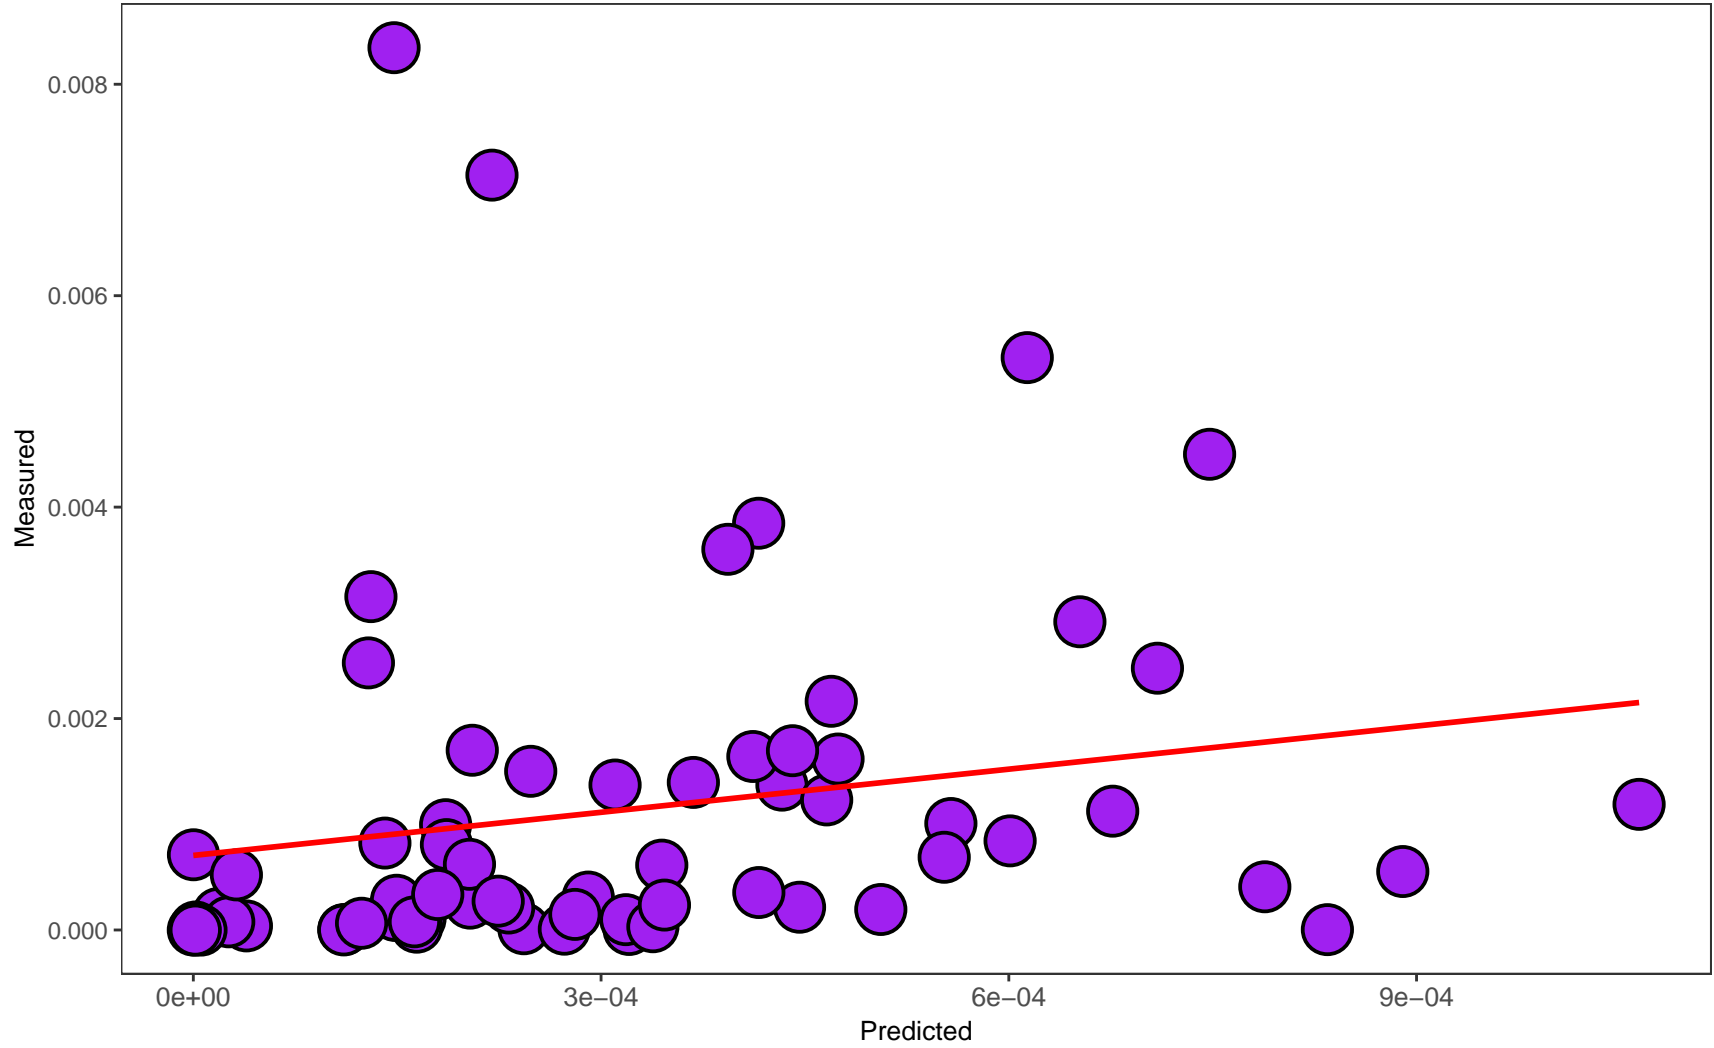

xanthine (HILIC-neg\_Cluster\_0187): Spearman 0.43

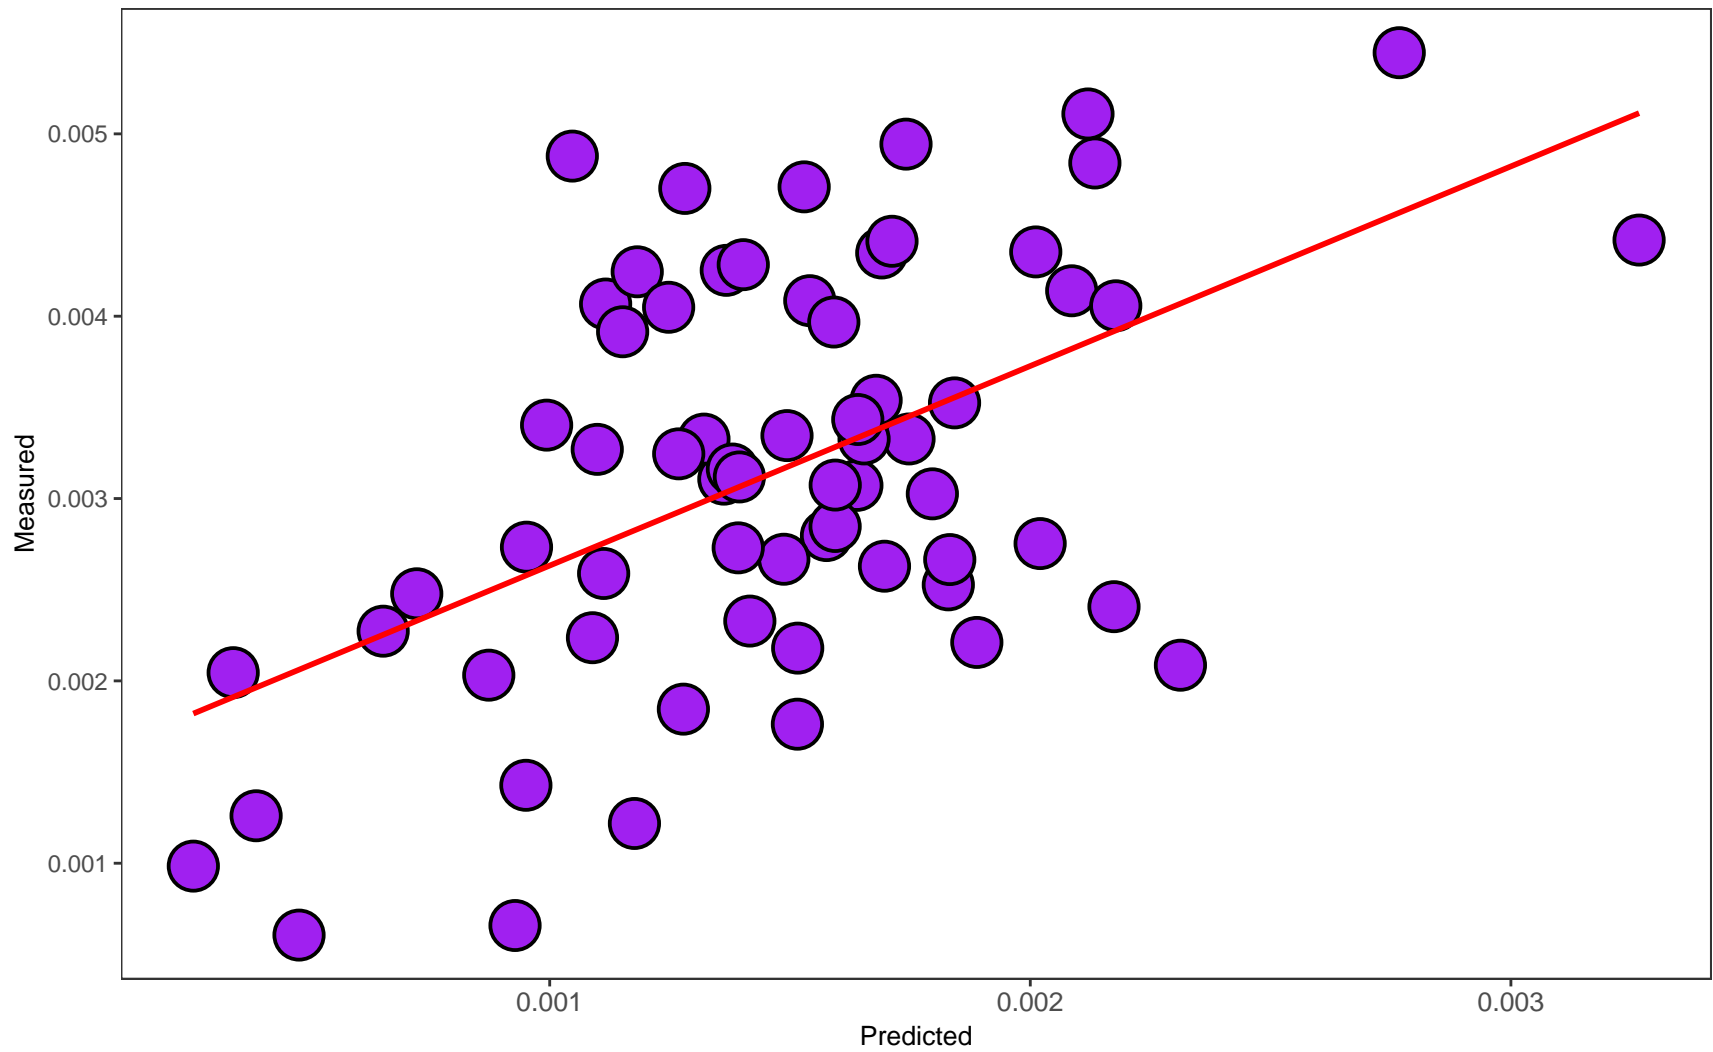

3-methyladipate-pimelate (HILIC-neg\_Cluster\_0220): Spearman 0.33

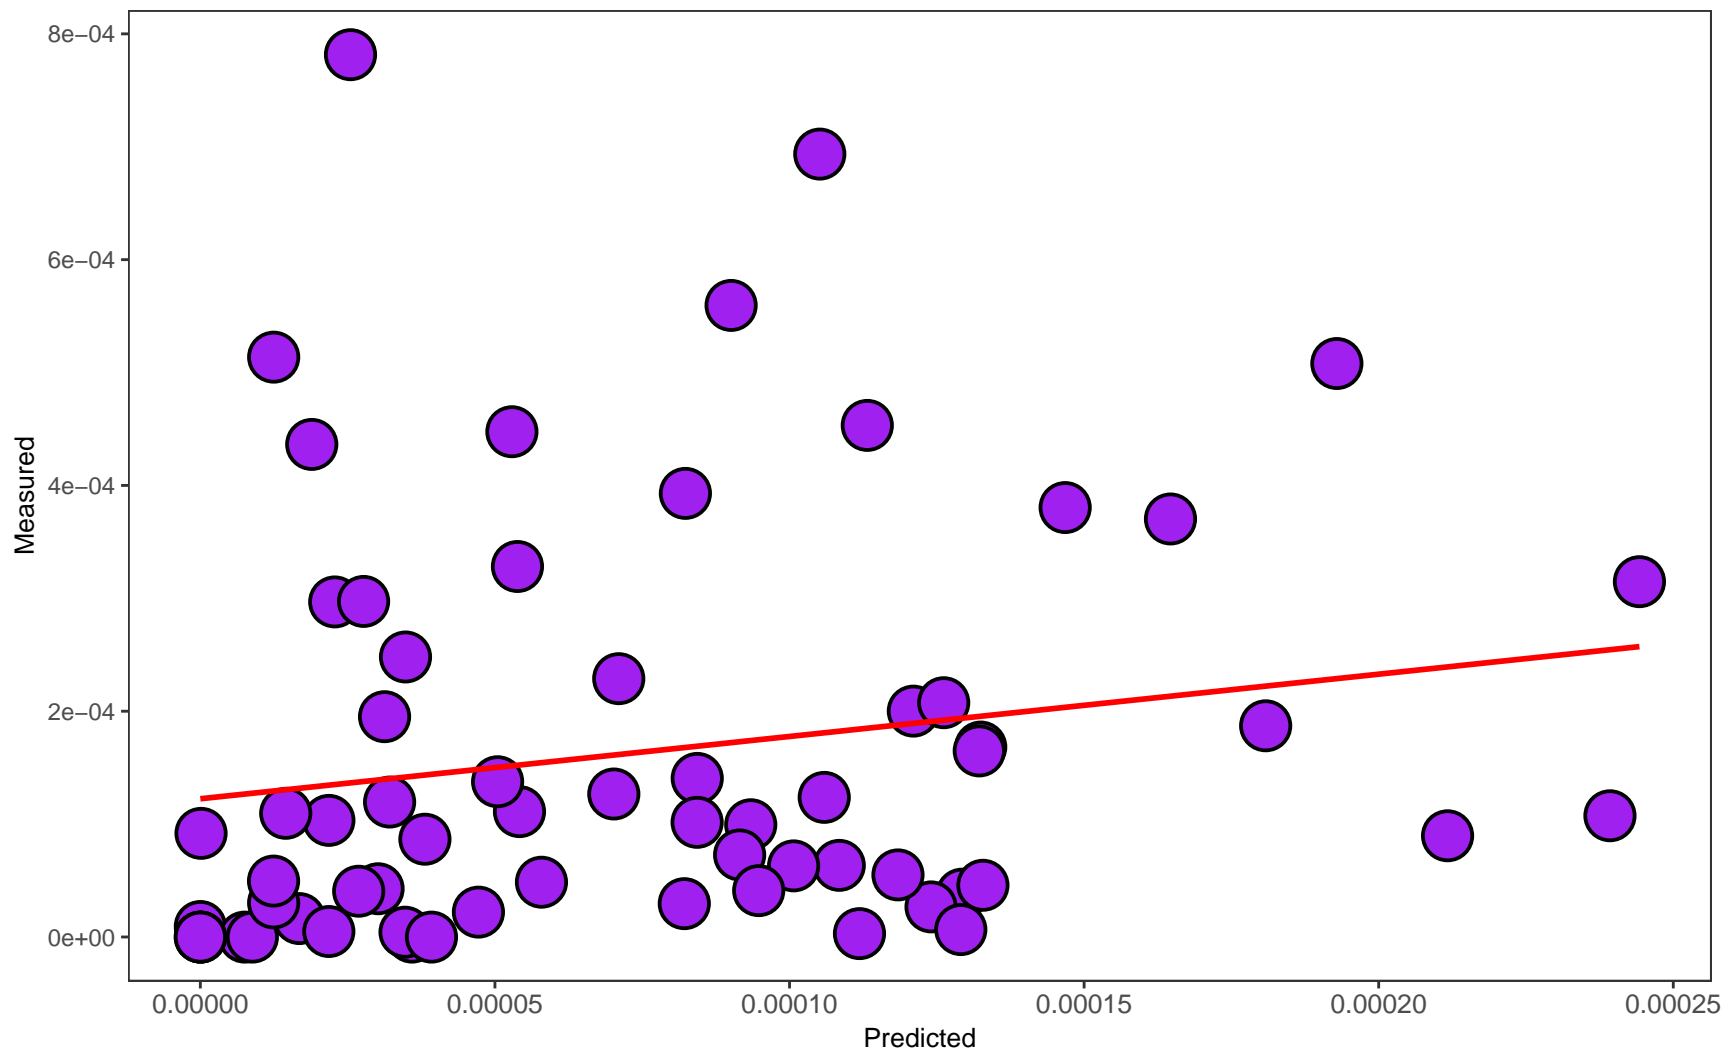

citrulline (HILIC-neg\_Cluster\_0296): Spearman 0.33

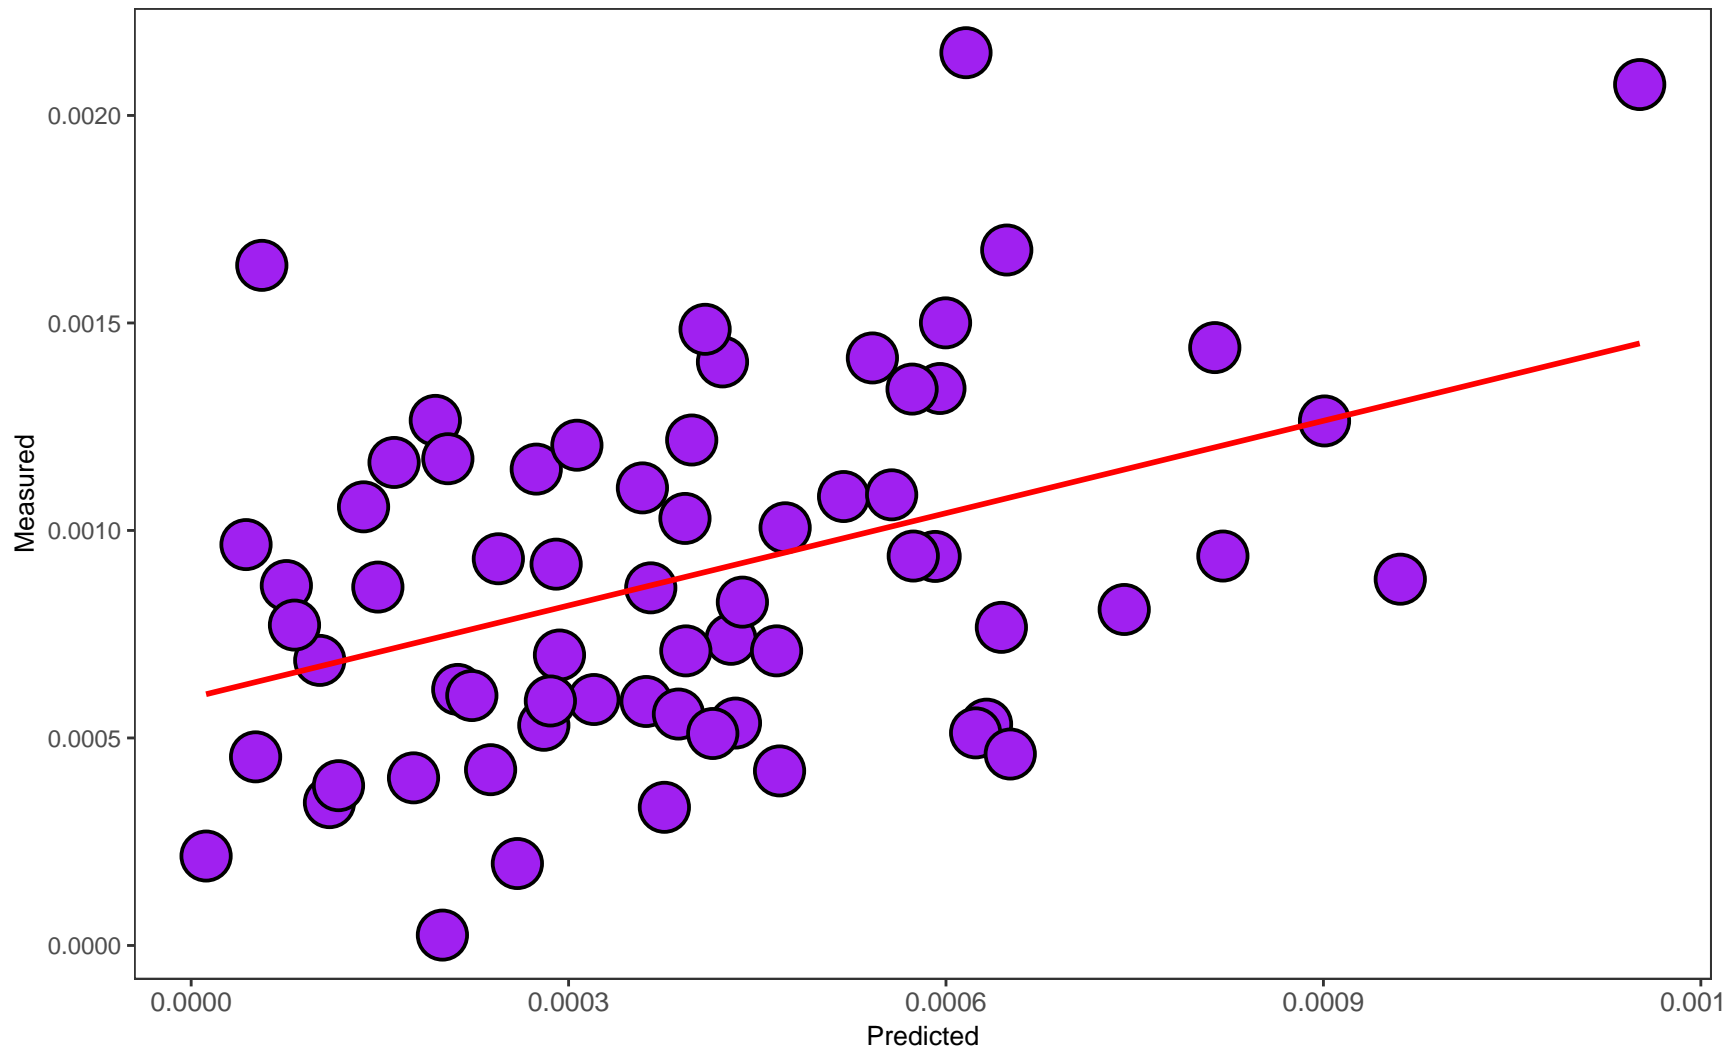

fructose/glucose/galactose\* (HILIC-neg\_Cluster\_0321): Spearman 0.33

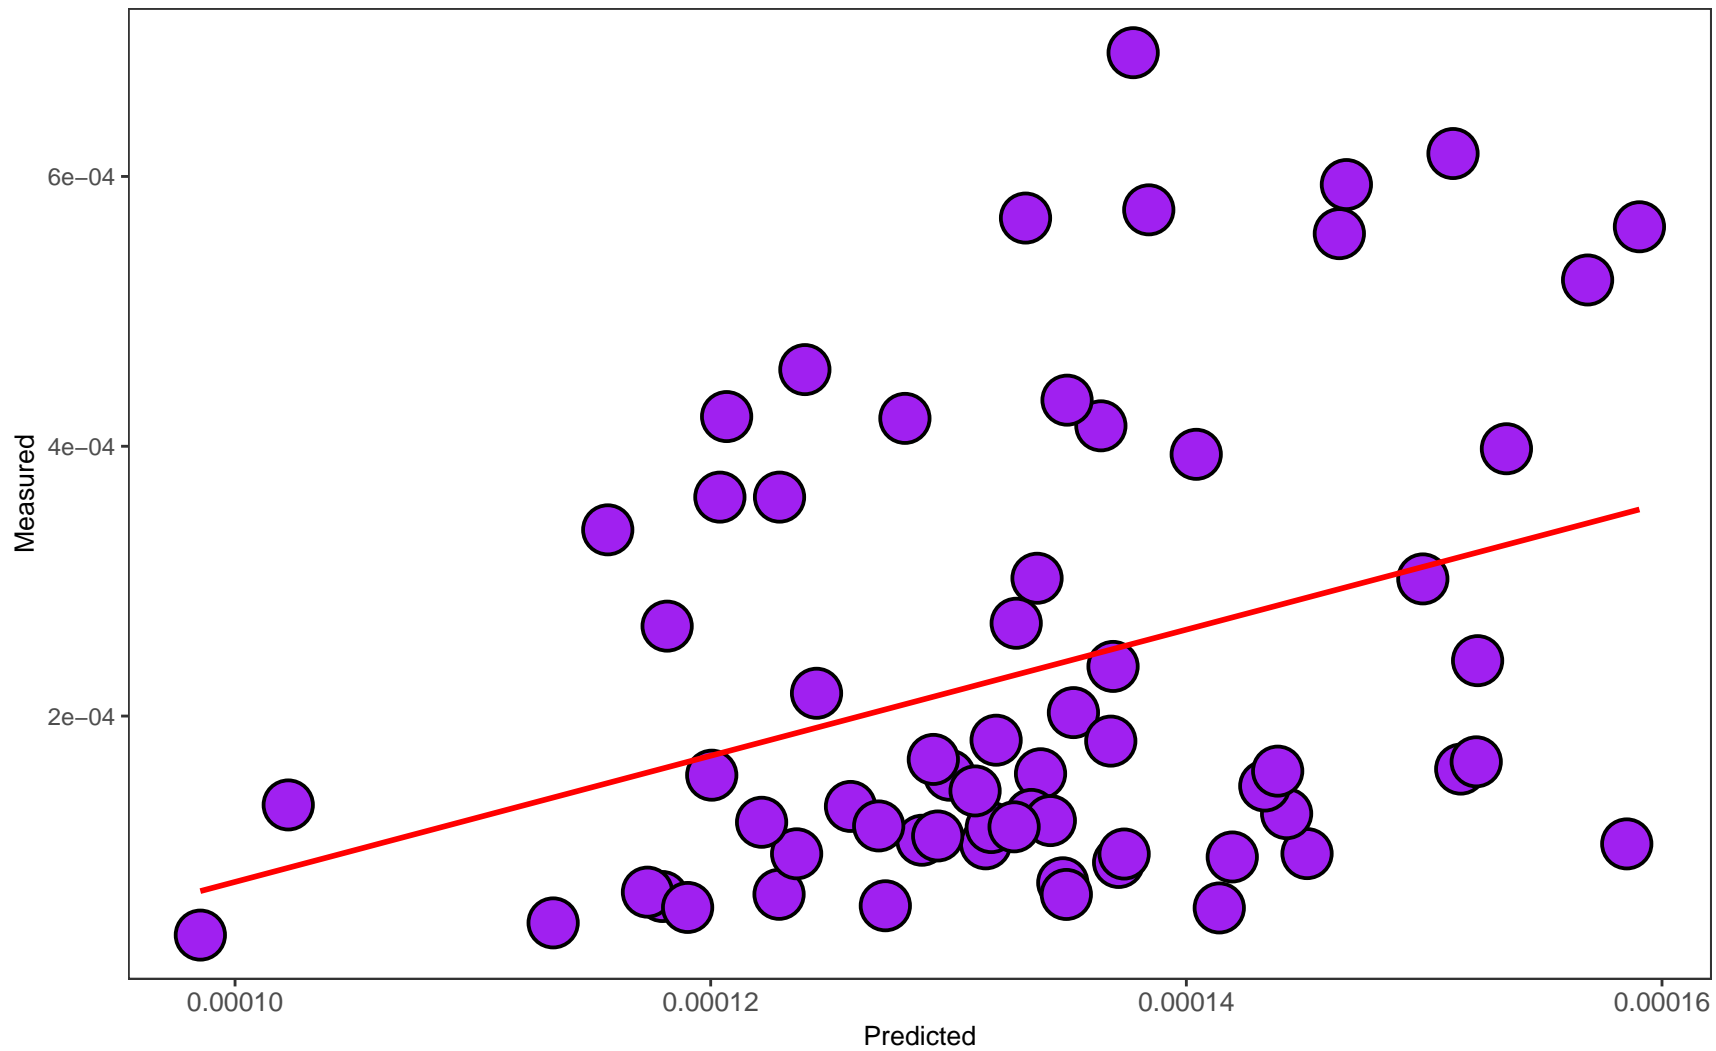



azelaic acid (HILIC-neg\_Cluster\_0365): Spearman 0.42

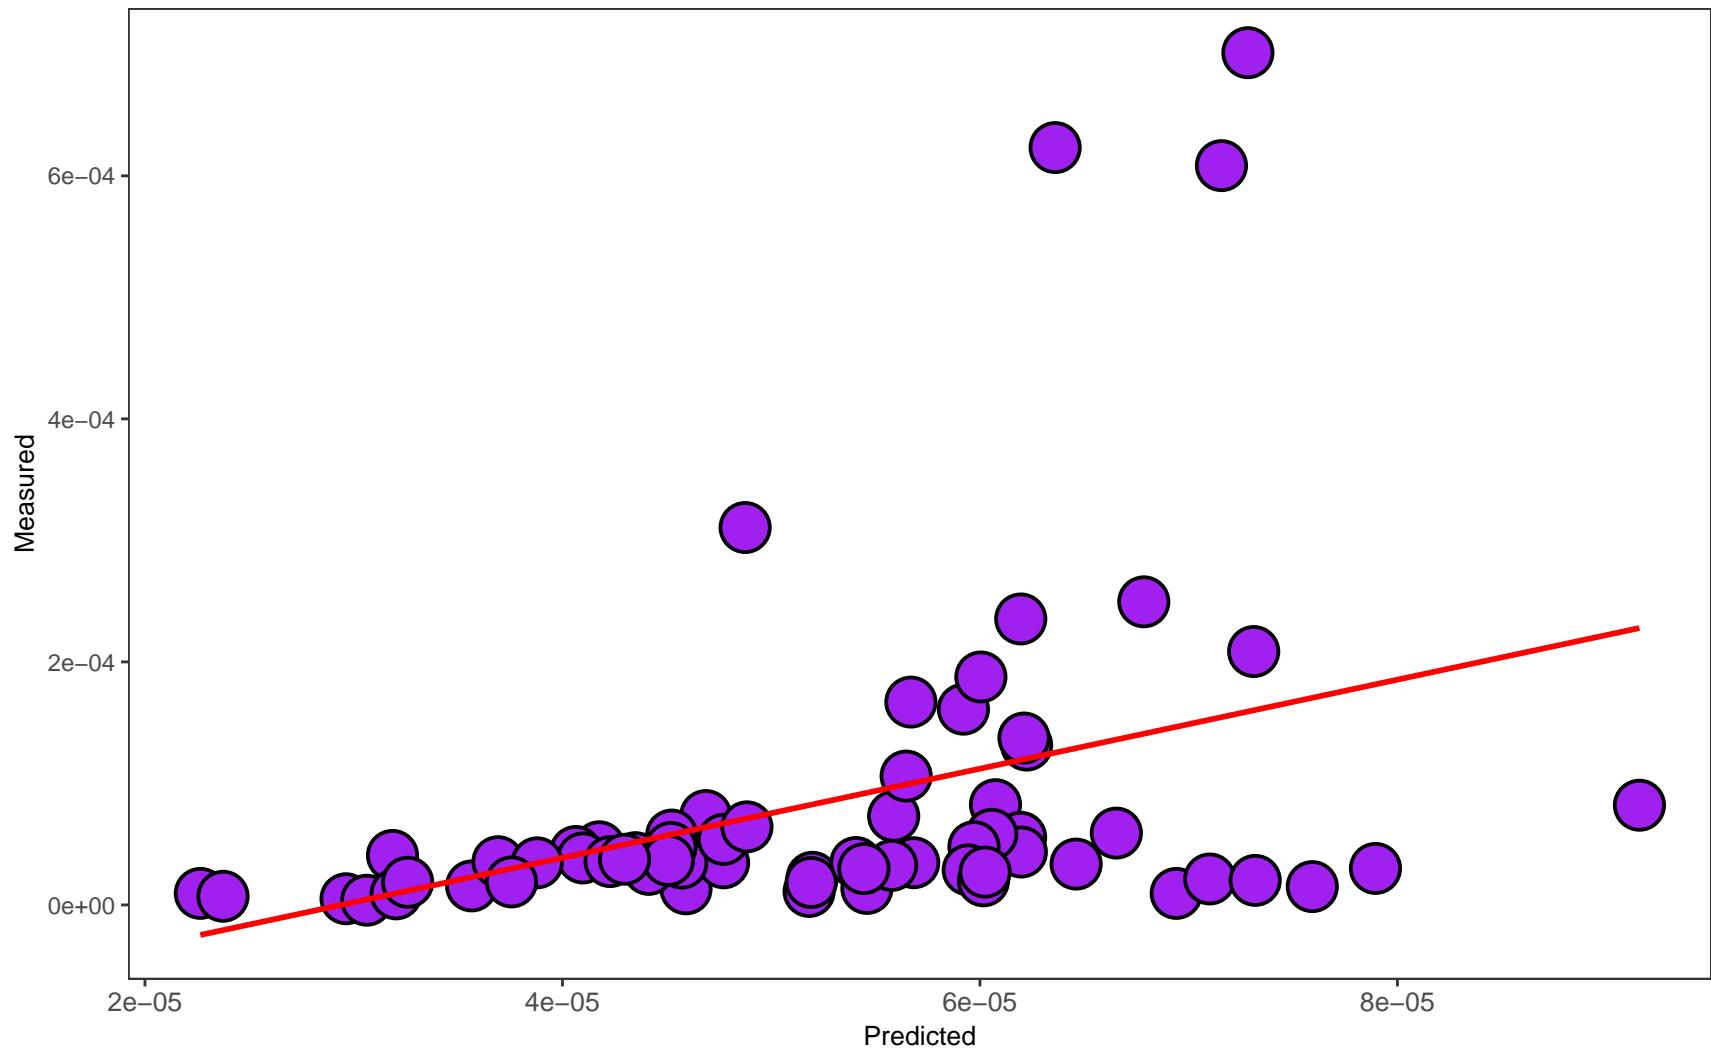

N-acetylglutamate (HILIC-neg\_Cluster\_0372): Spearman 0.35

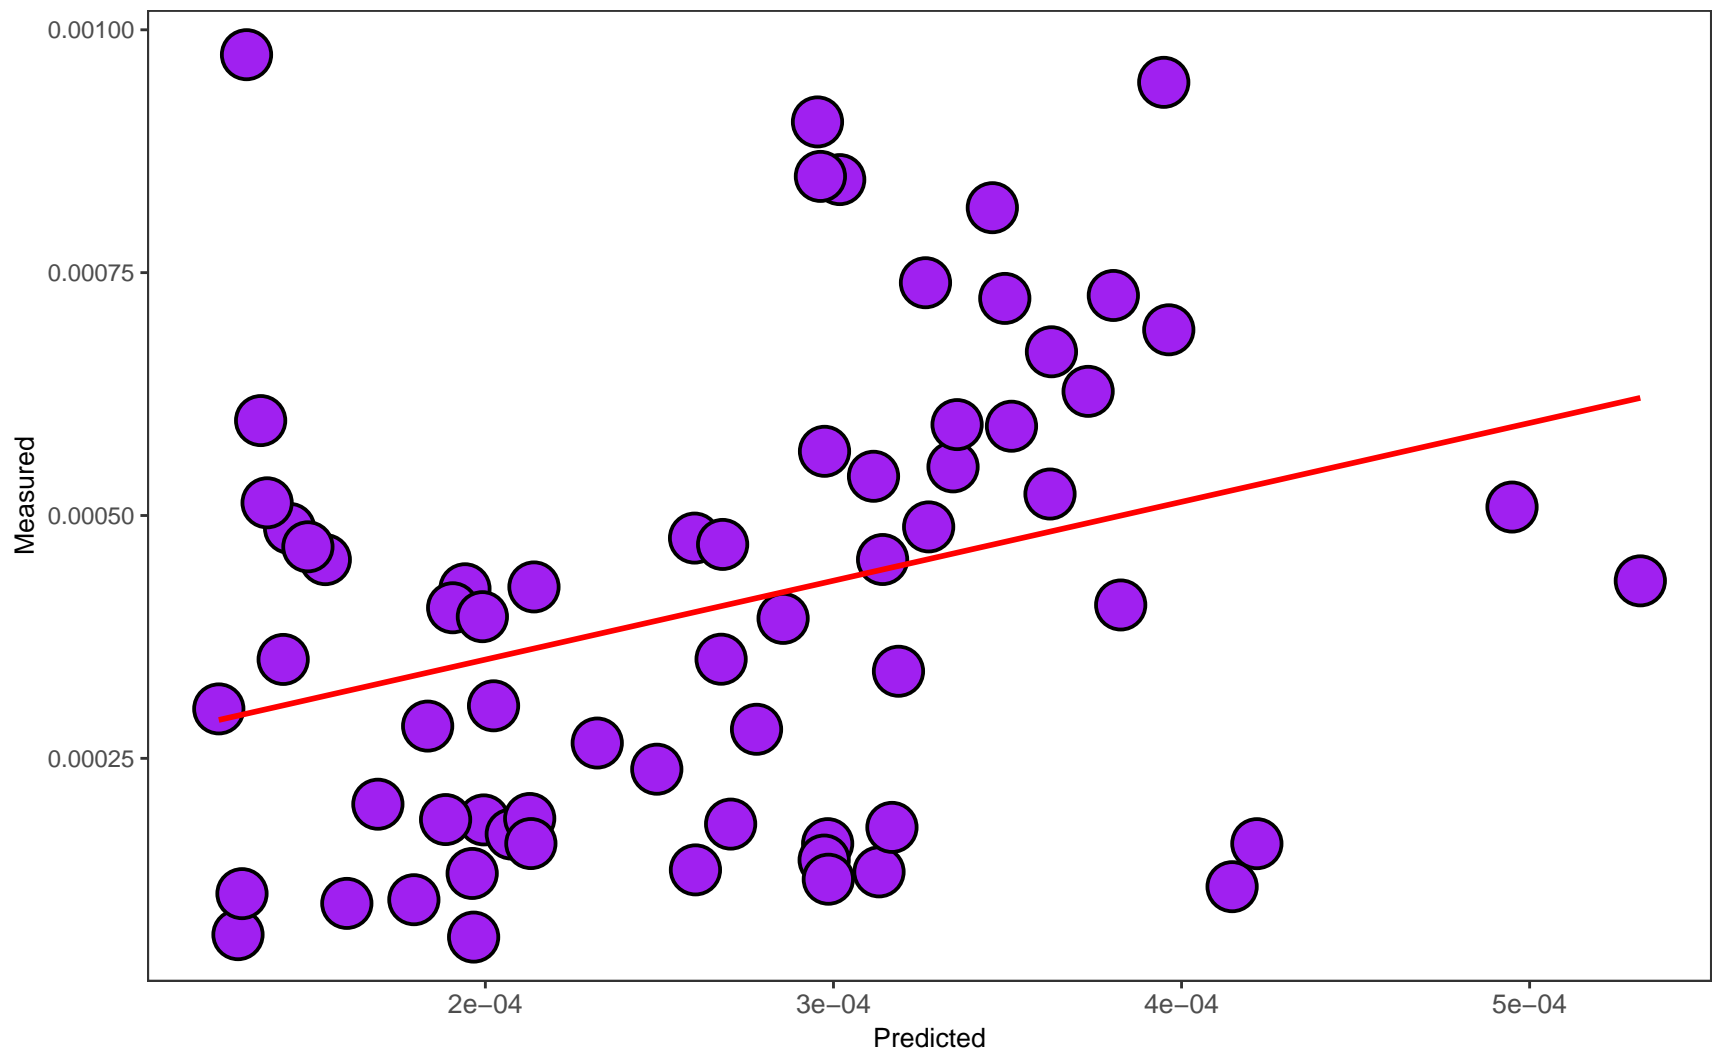

glucurote (HILIC-neg\_Cluster\_0401): Spearman 0.41

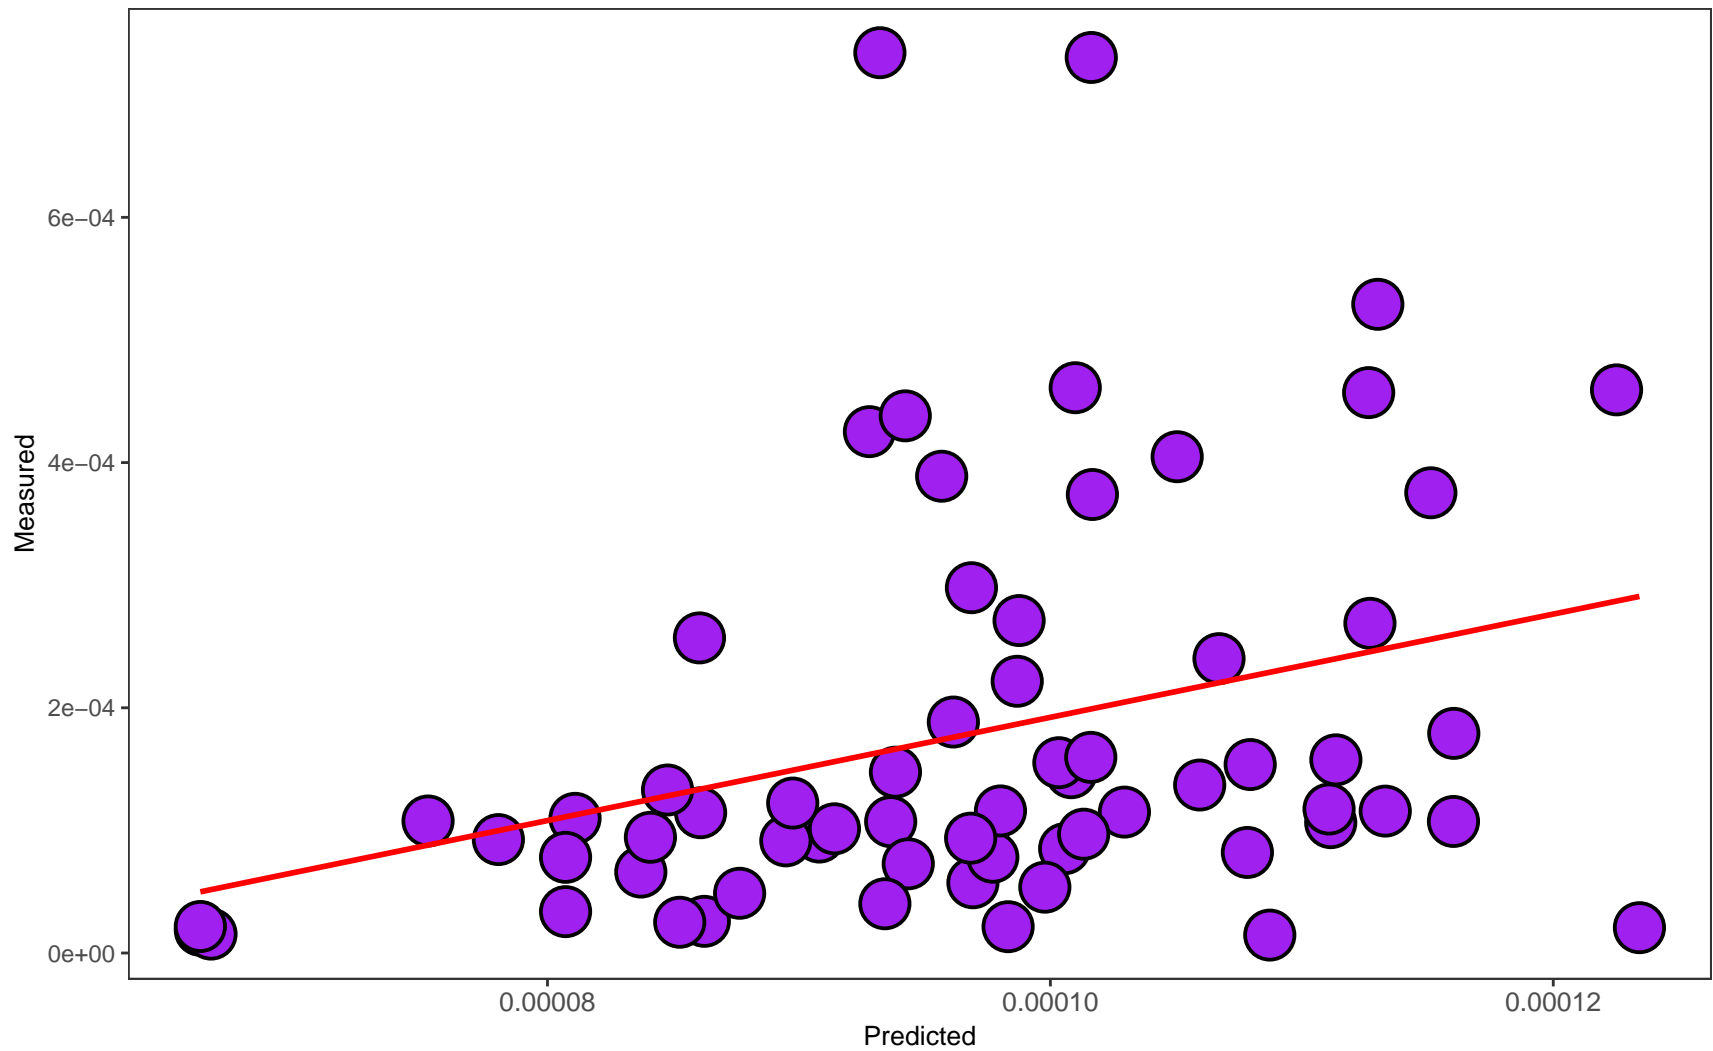

pseudouridine (HILIC-neg\_Cluster\_0707): Spearman 0.34

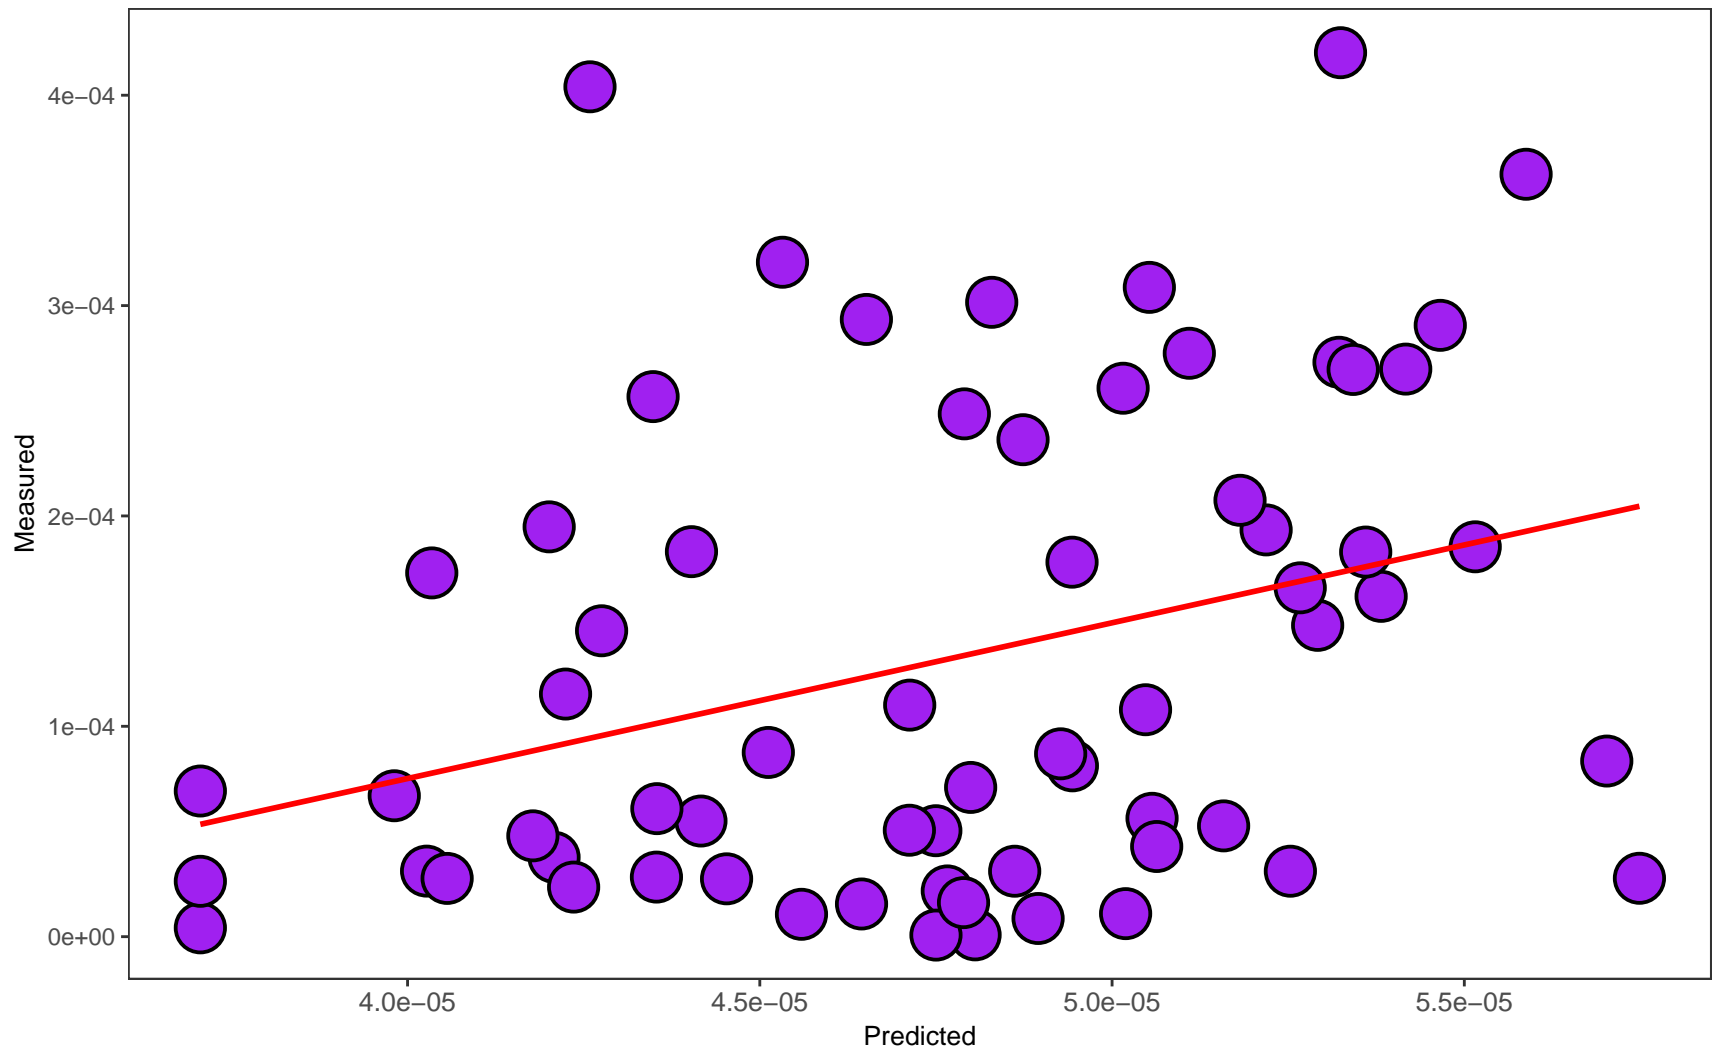

deoxyinosine (HILIC-neg\_Cluster\_0740): Spearman 0.31

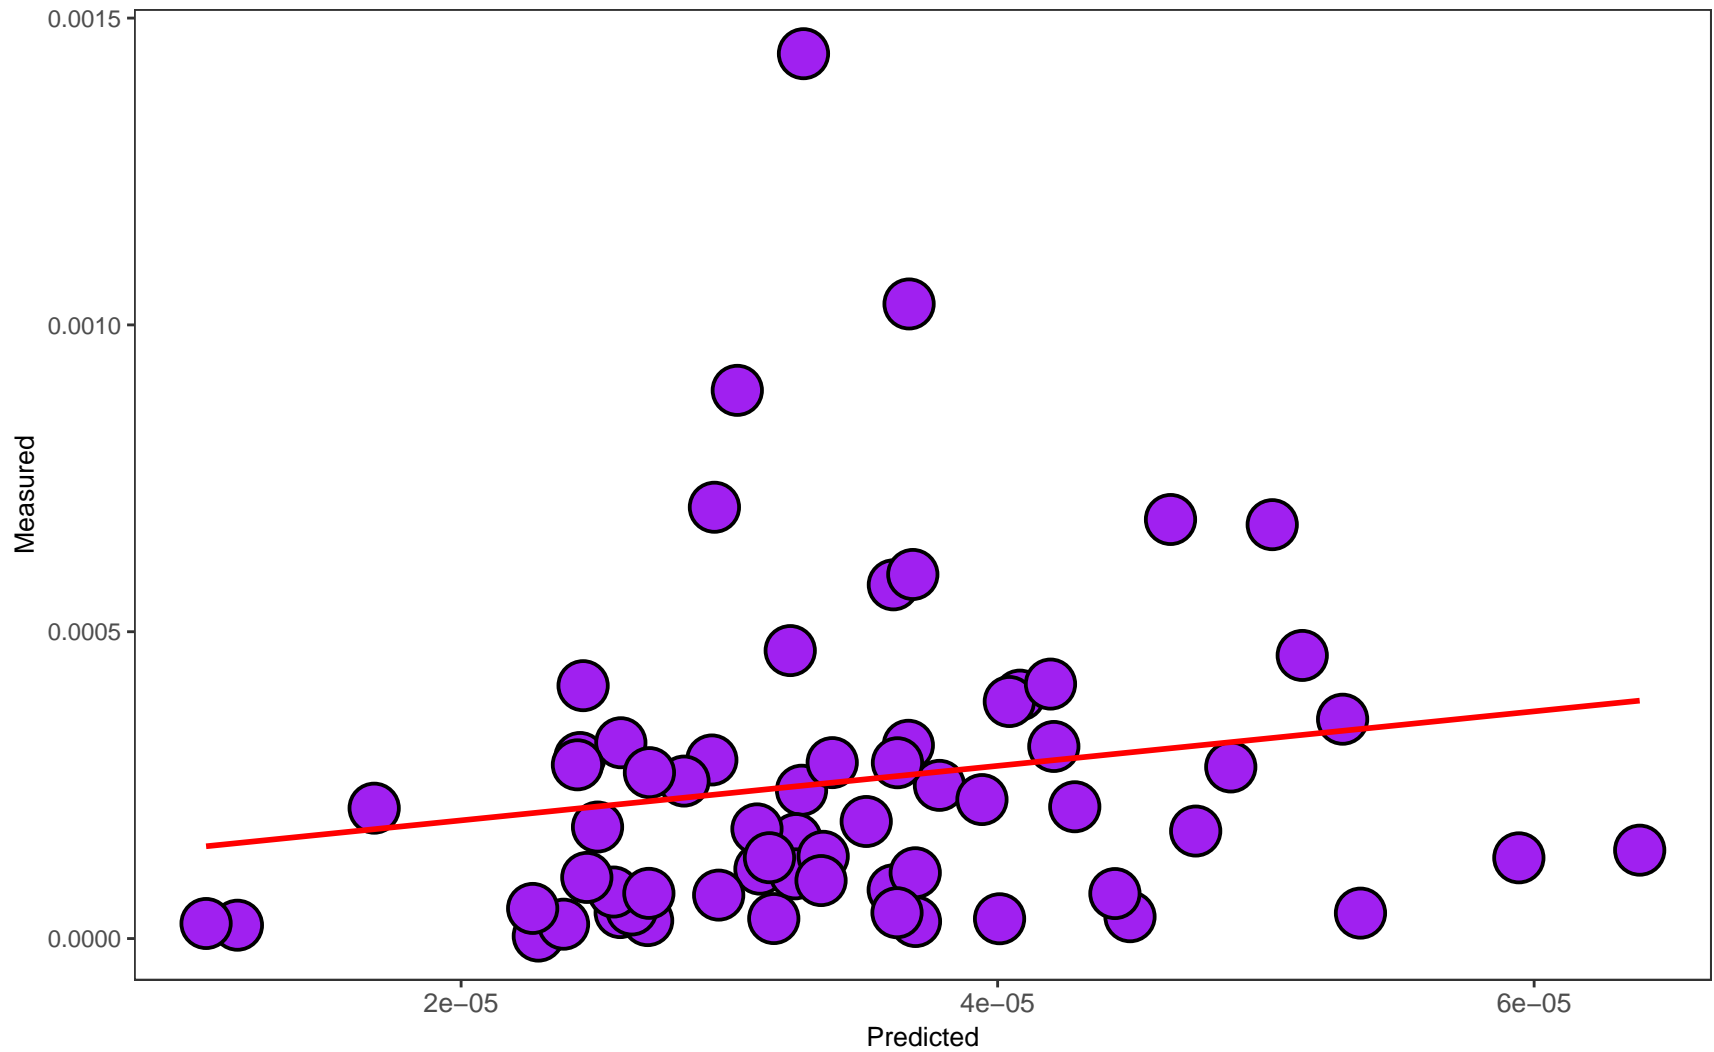

linoleoyl ethanolamide (HILIC-neg\_Cluster\_1088): Spearman 0.43

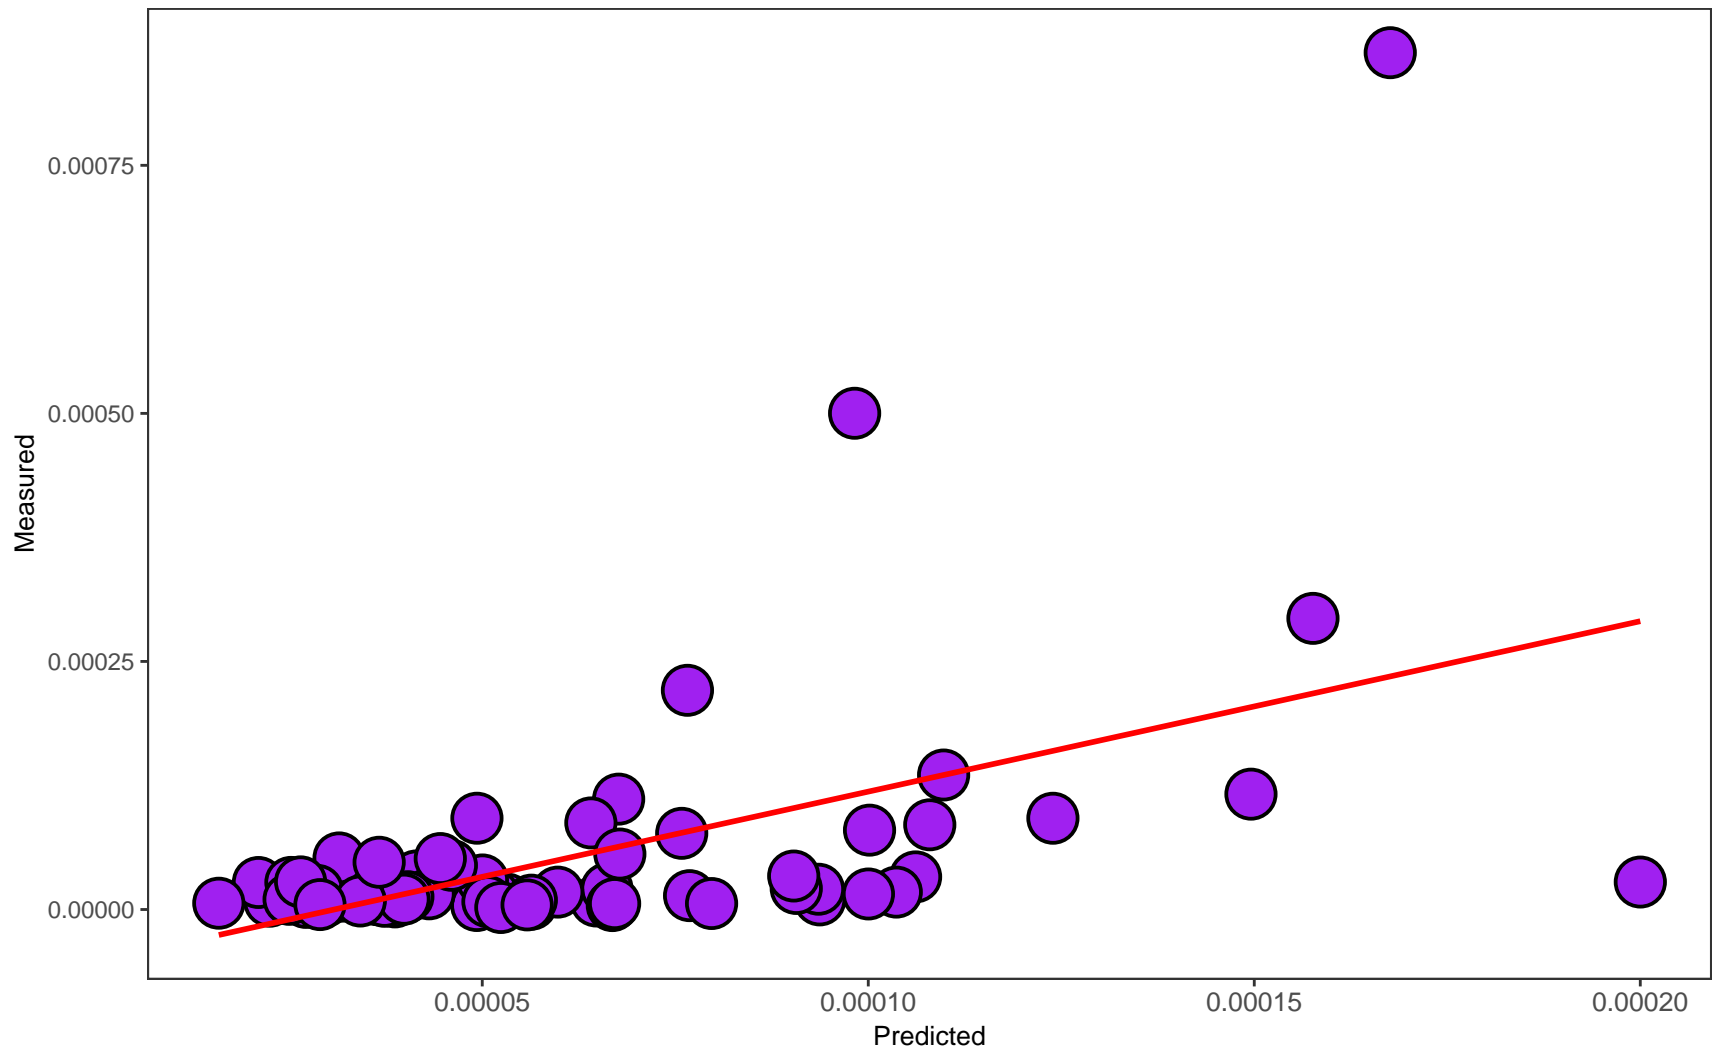

docosapentaenoate (HILIC-neg\_Cluster\_1126): Spearman 0.67

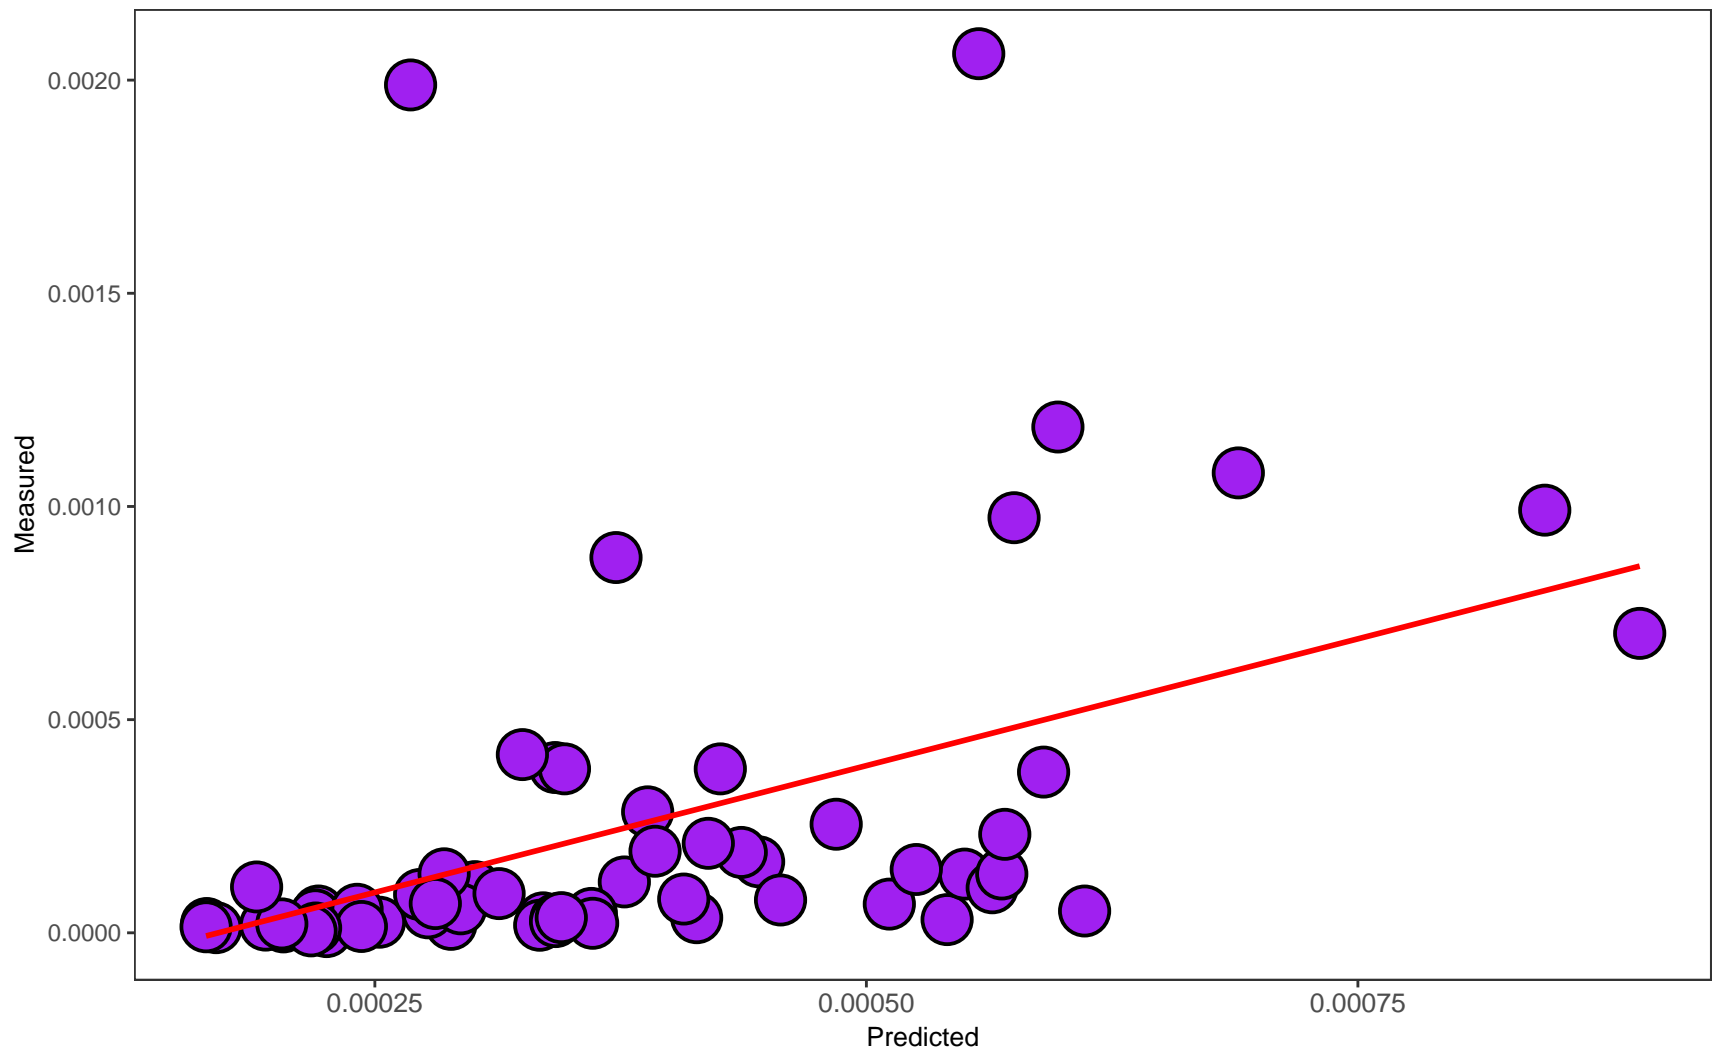

lithocholate (HILIC-neg\_Cluster\_1303): Spearman 0.43

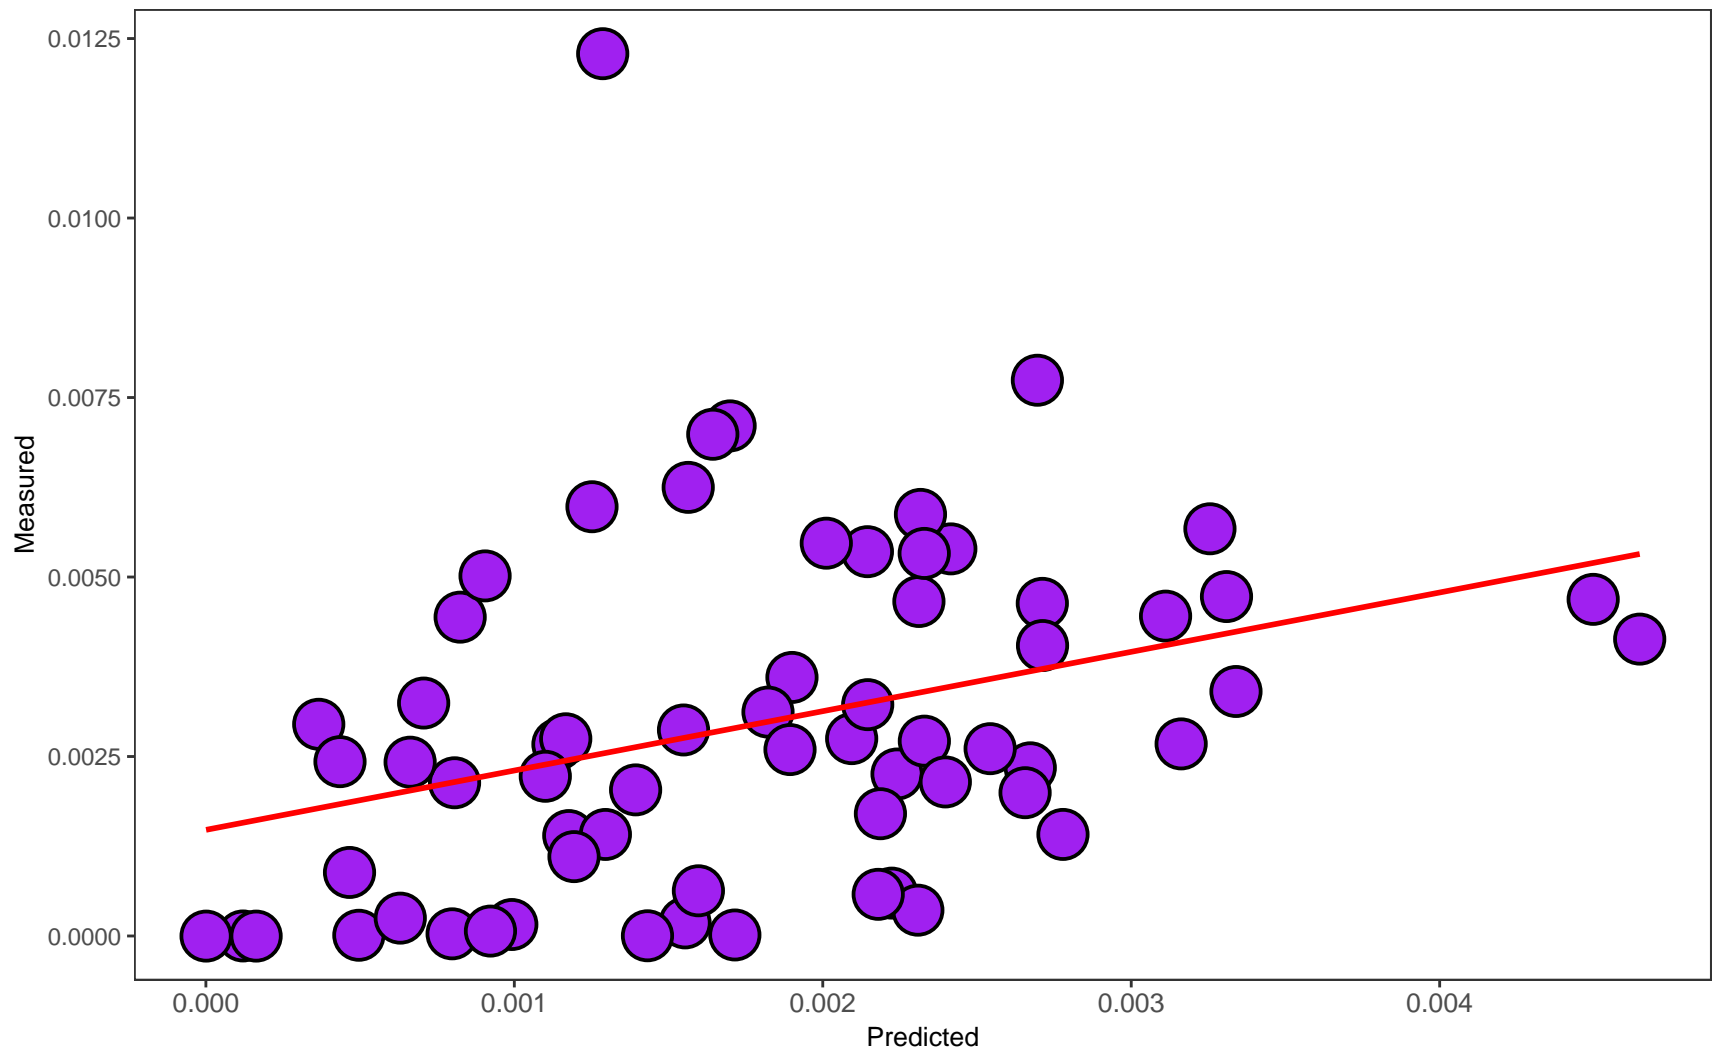



chenodeoxycholate/deoxycholate\* (HILIC-neg\_Cluster\_1360): Spearman 0.48

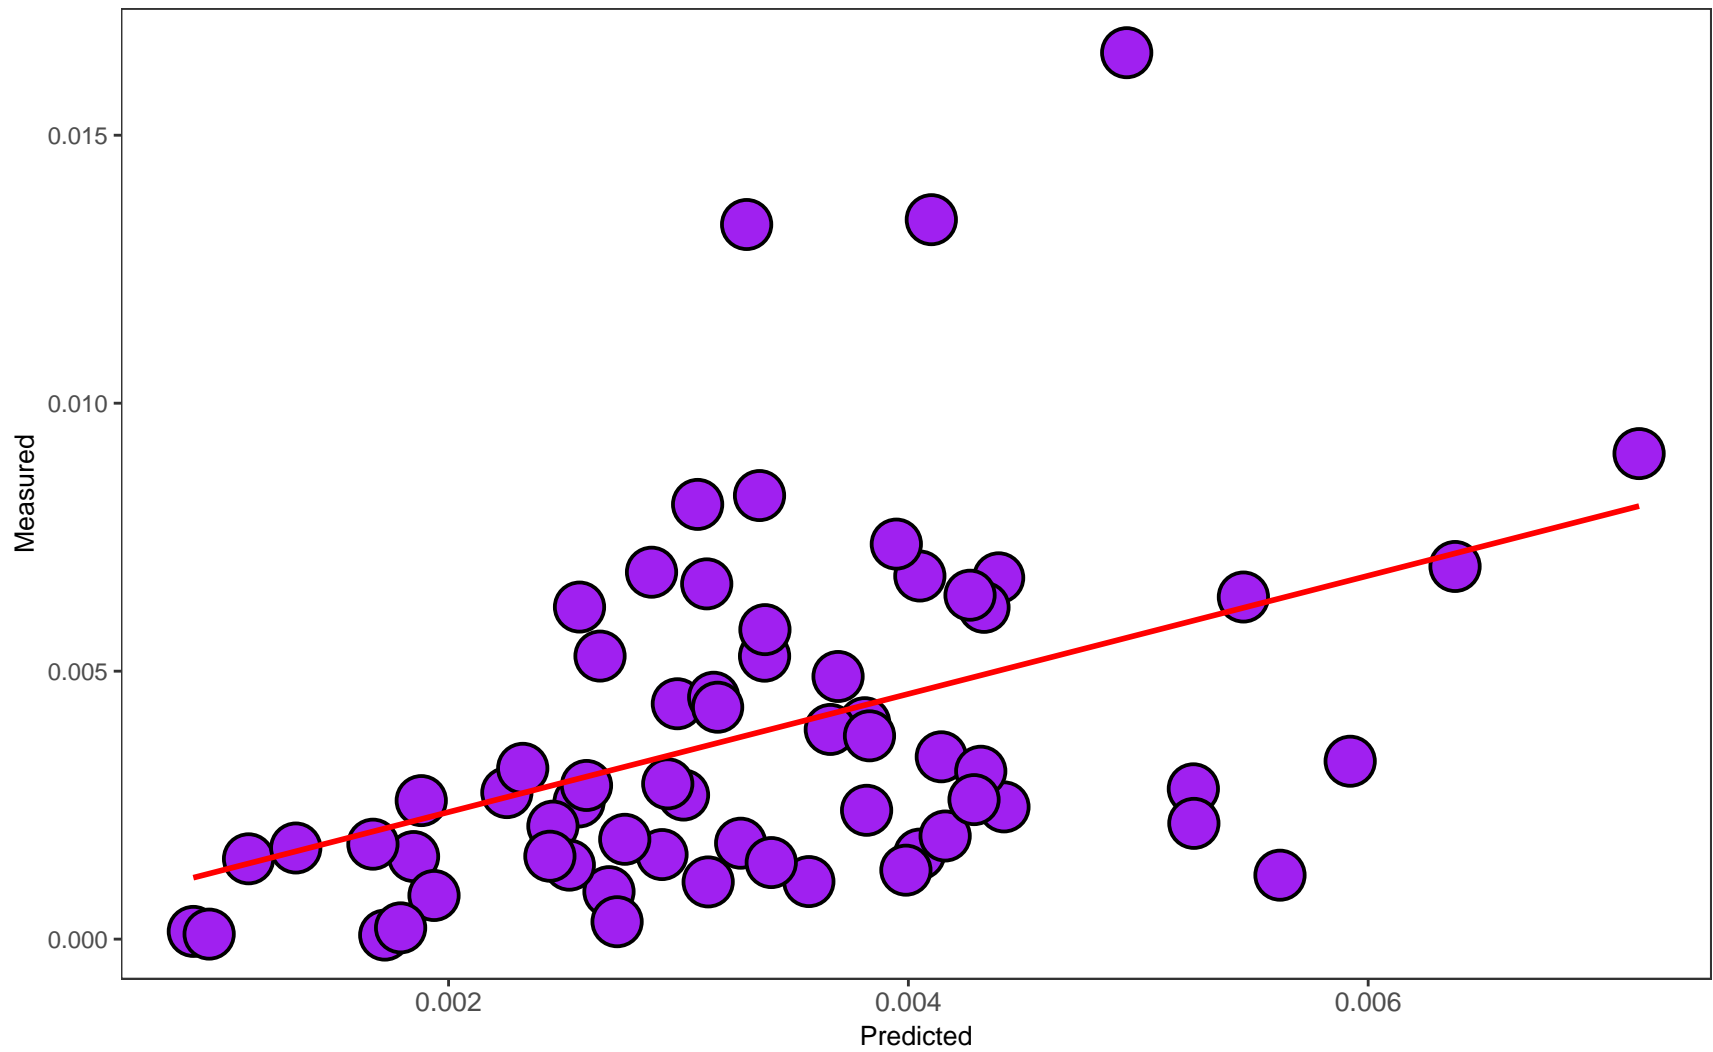

cholate (HILIC-neg\_Cluster\_1403): Spearman 0.65

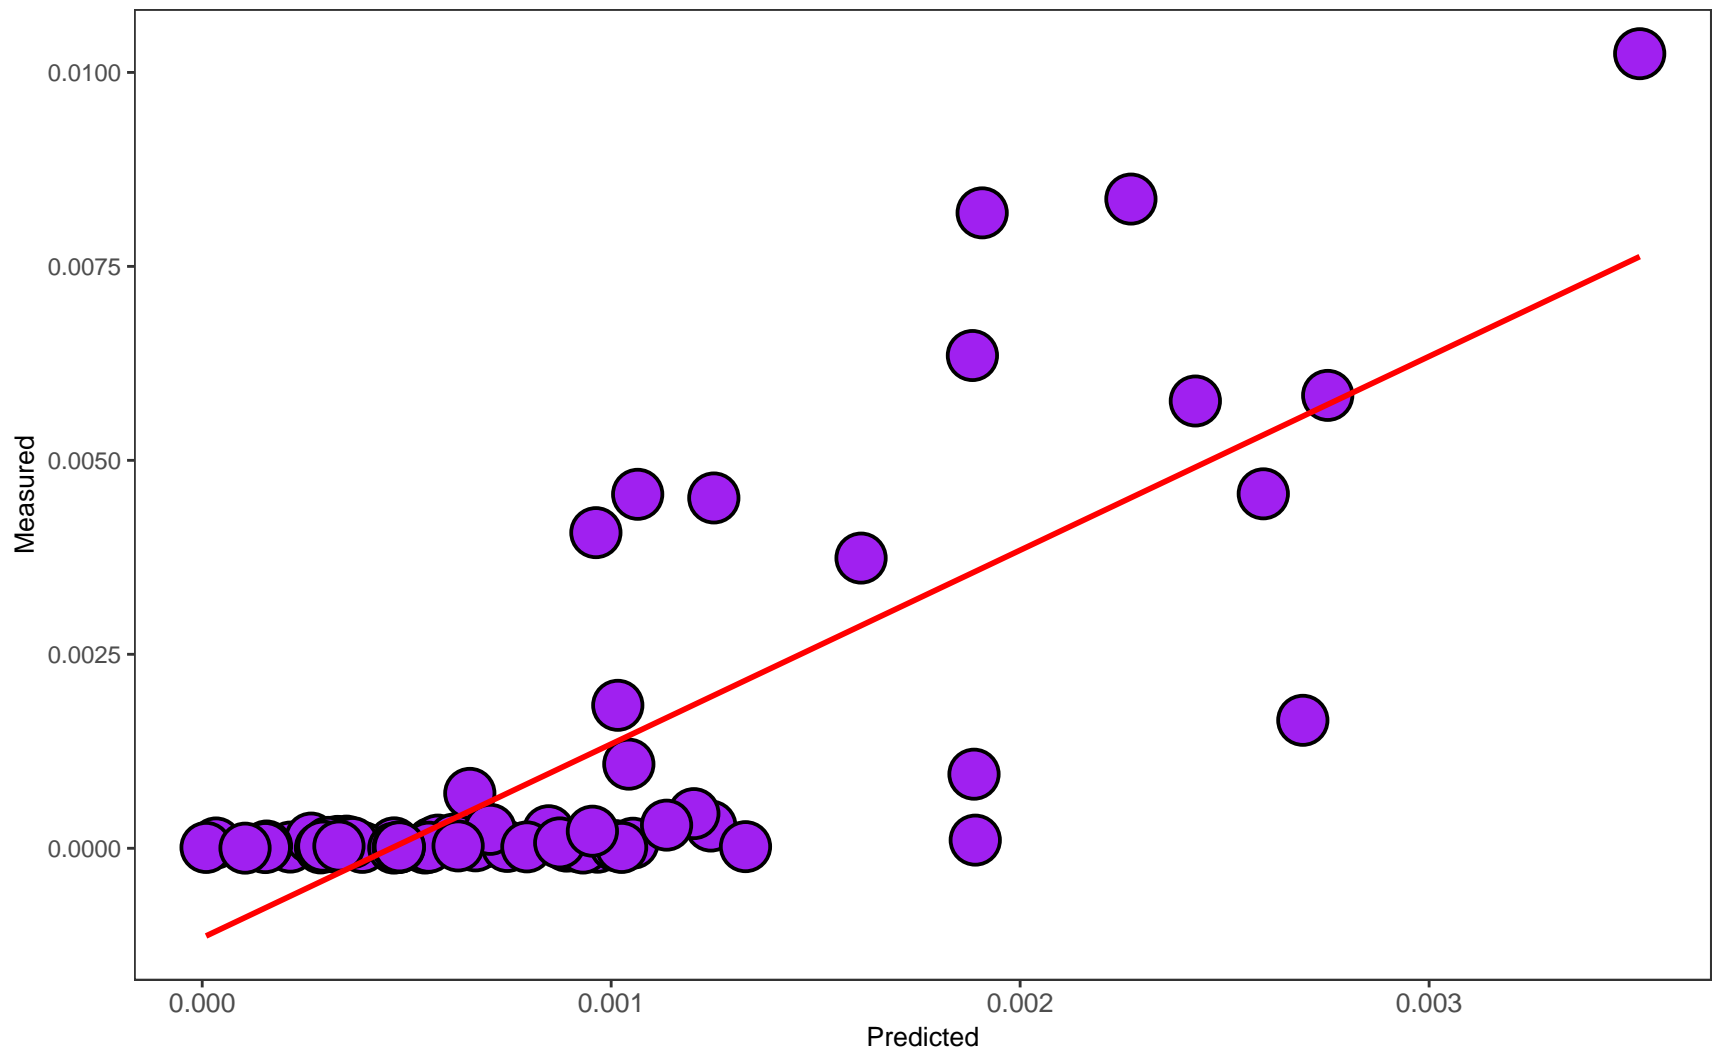

putrescine (HILIC-pos\_Cluster\_0007): Spearman 0.52

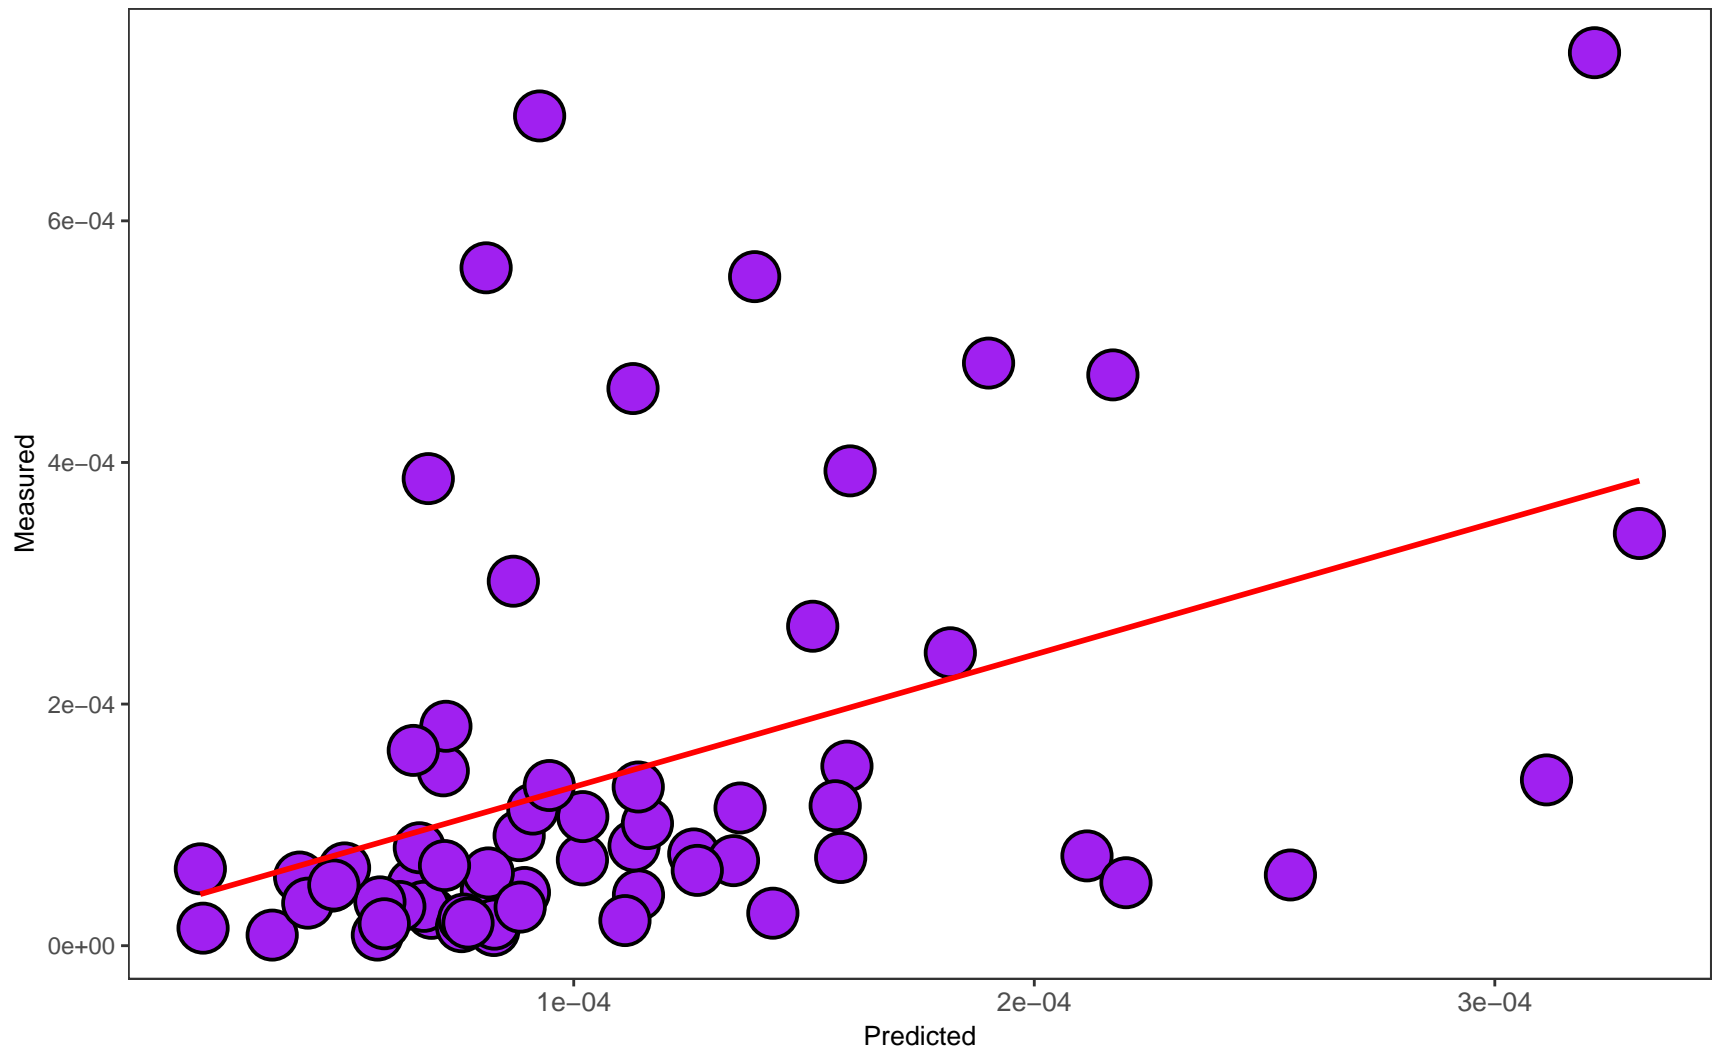

cytosine (HILIC-pos\_Cluster\_0032): Spearman 0.32

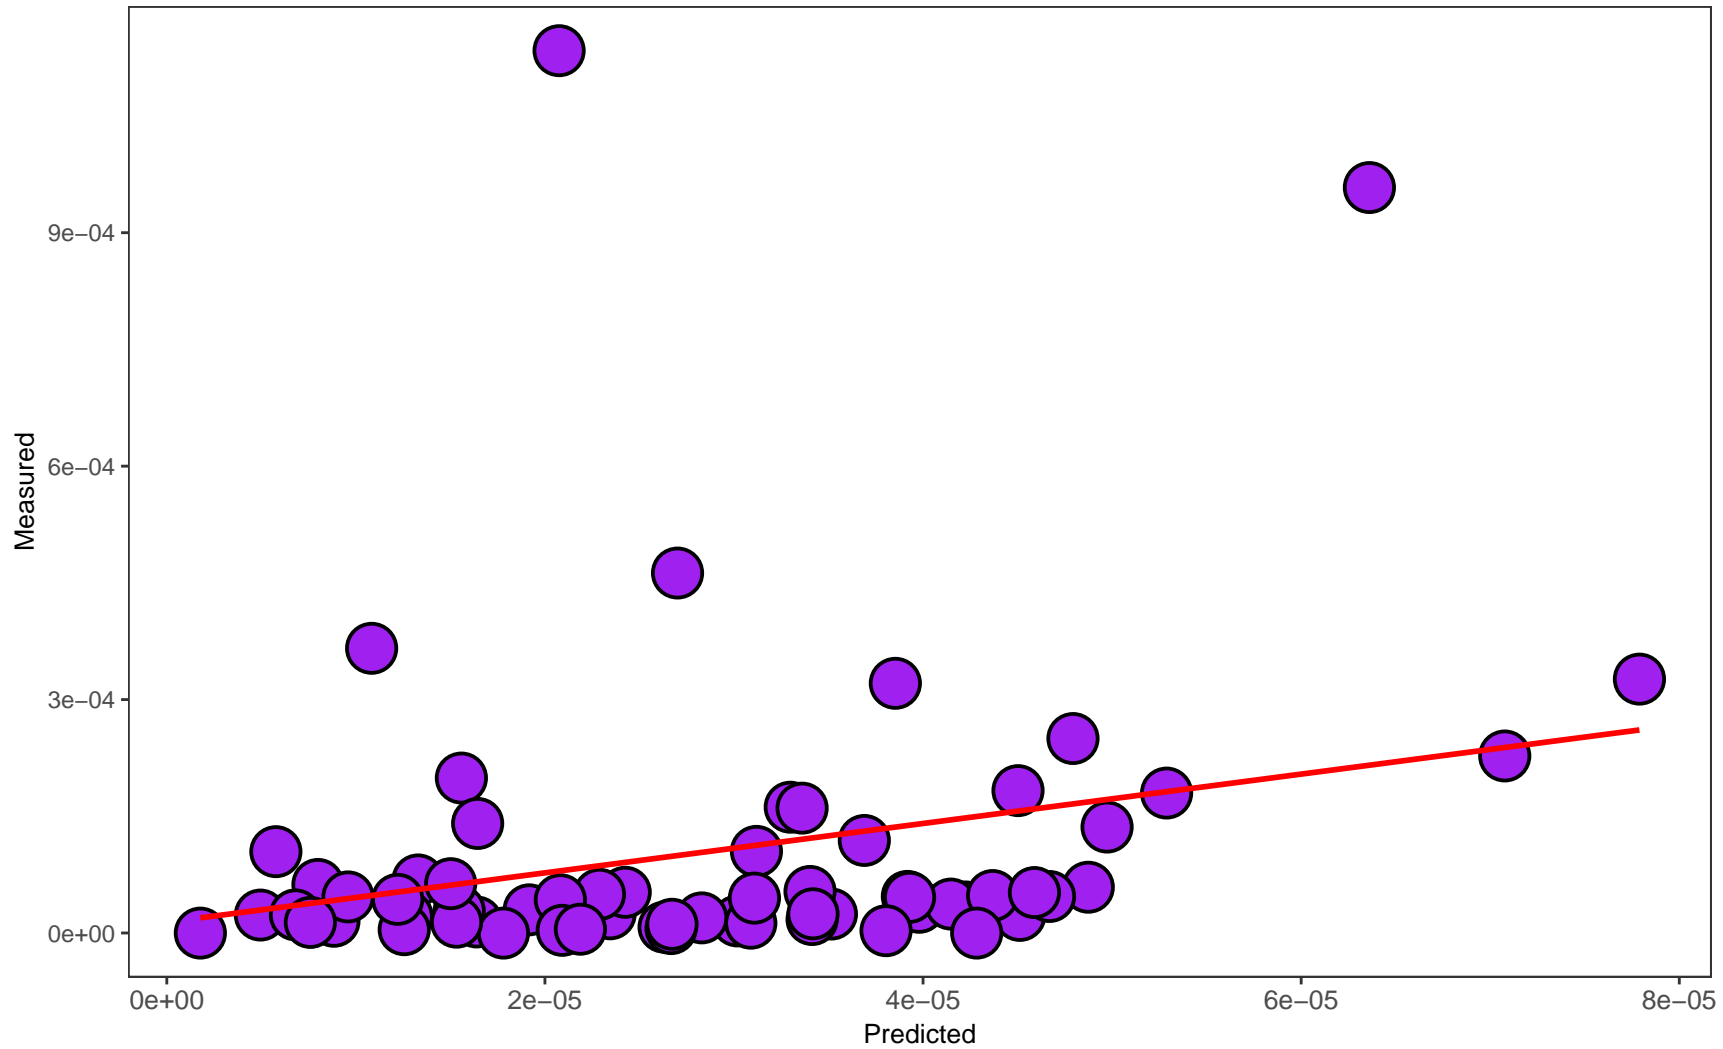

N-acetylputrescine (HILIC-pos\_Cluster\_0038): Spearman 0.53

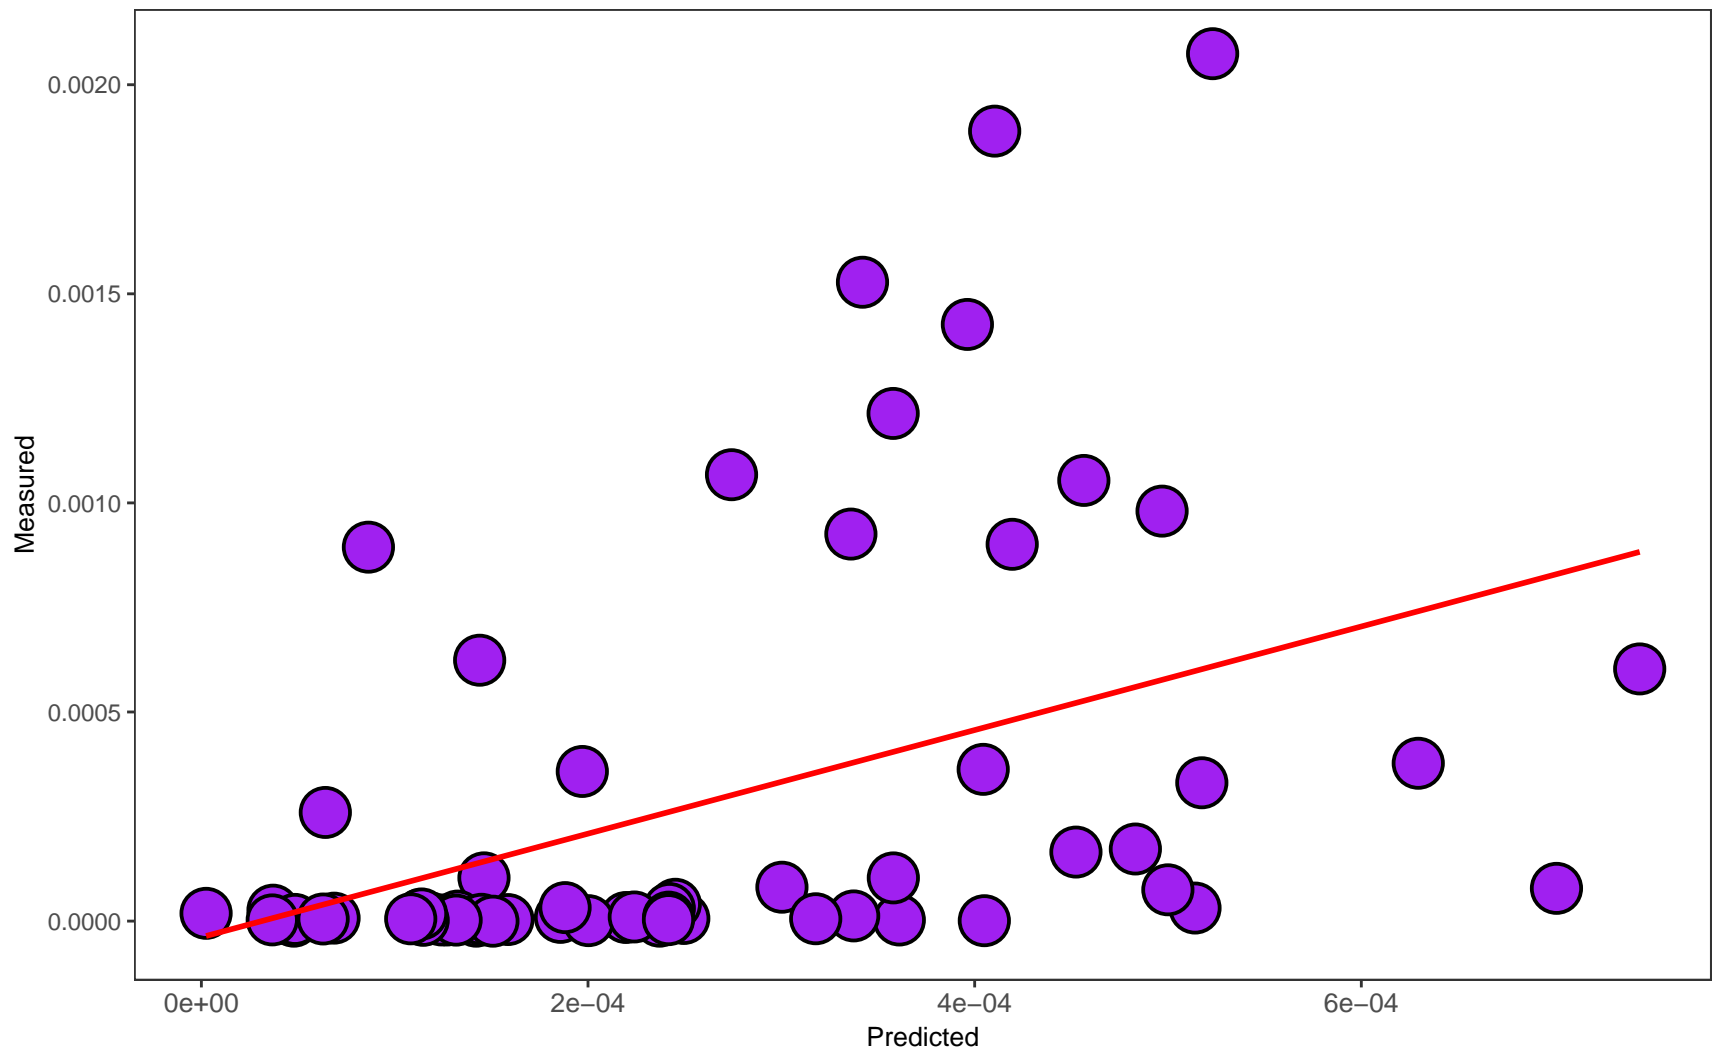

nicotinic acid (HILIC-pos\_Cluster\_0062): Spearman 0.37

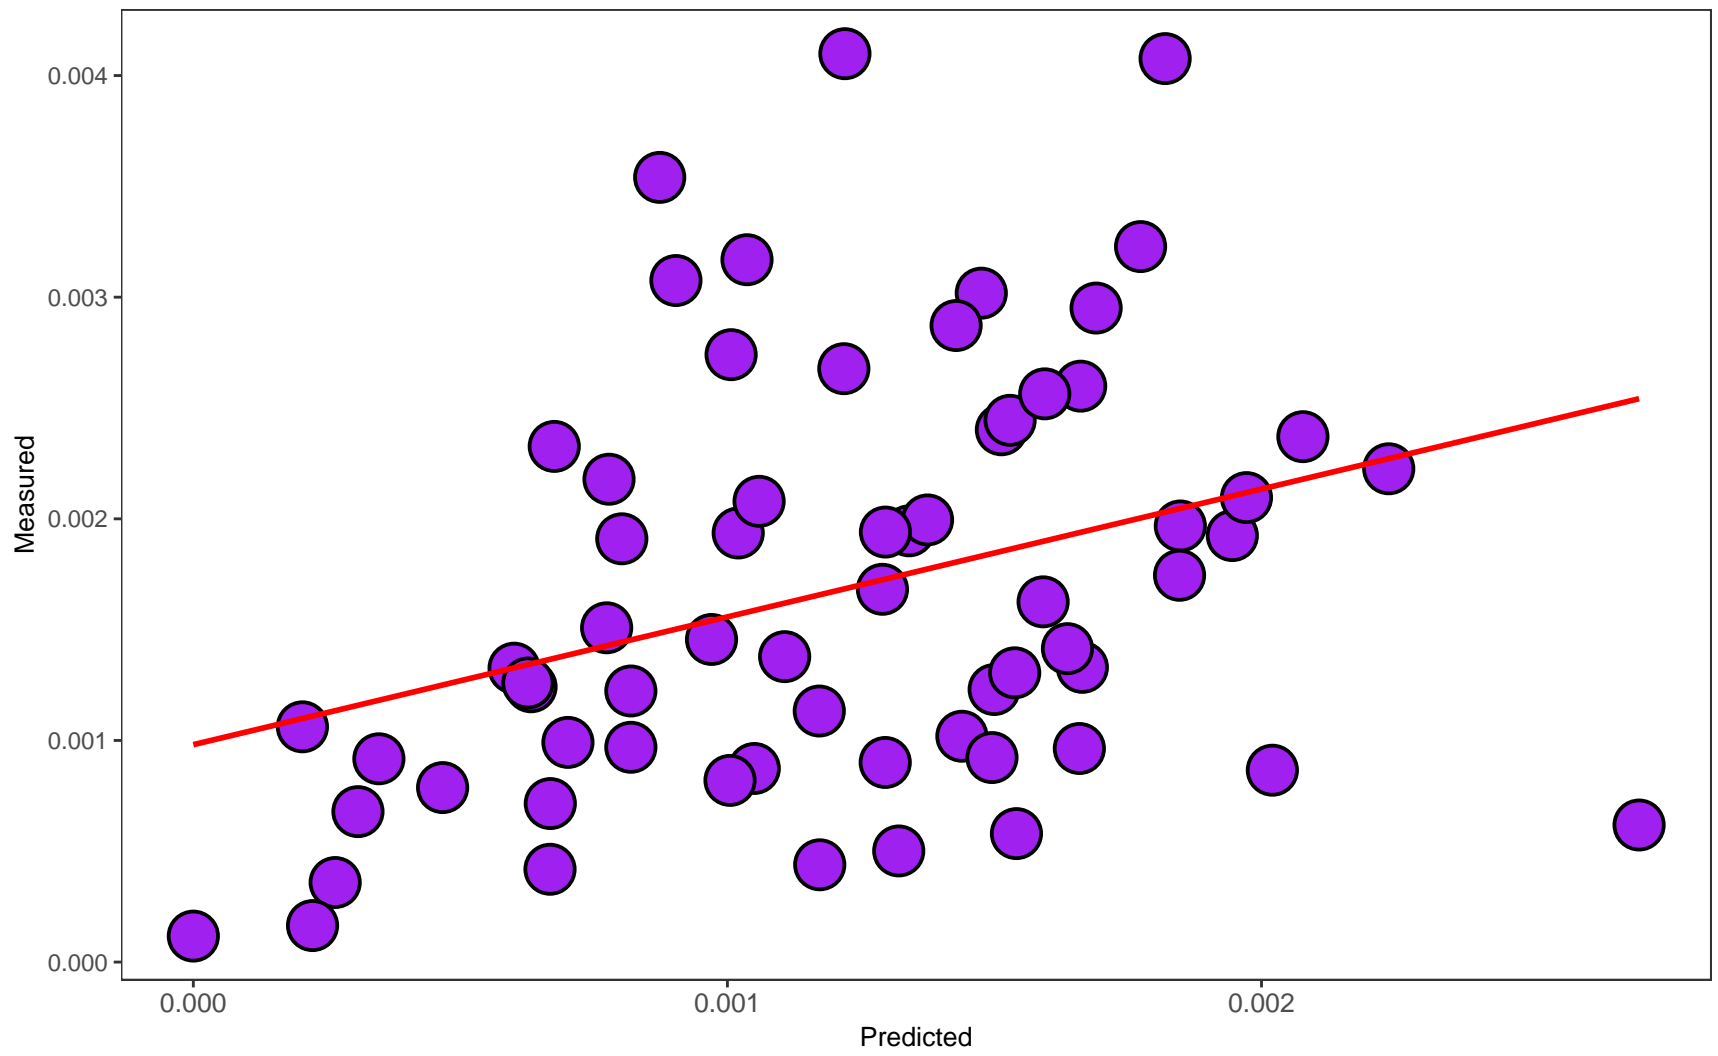

taurine (HILIC-pos\_Cluster\_0066): Spearman 0.31

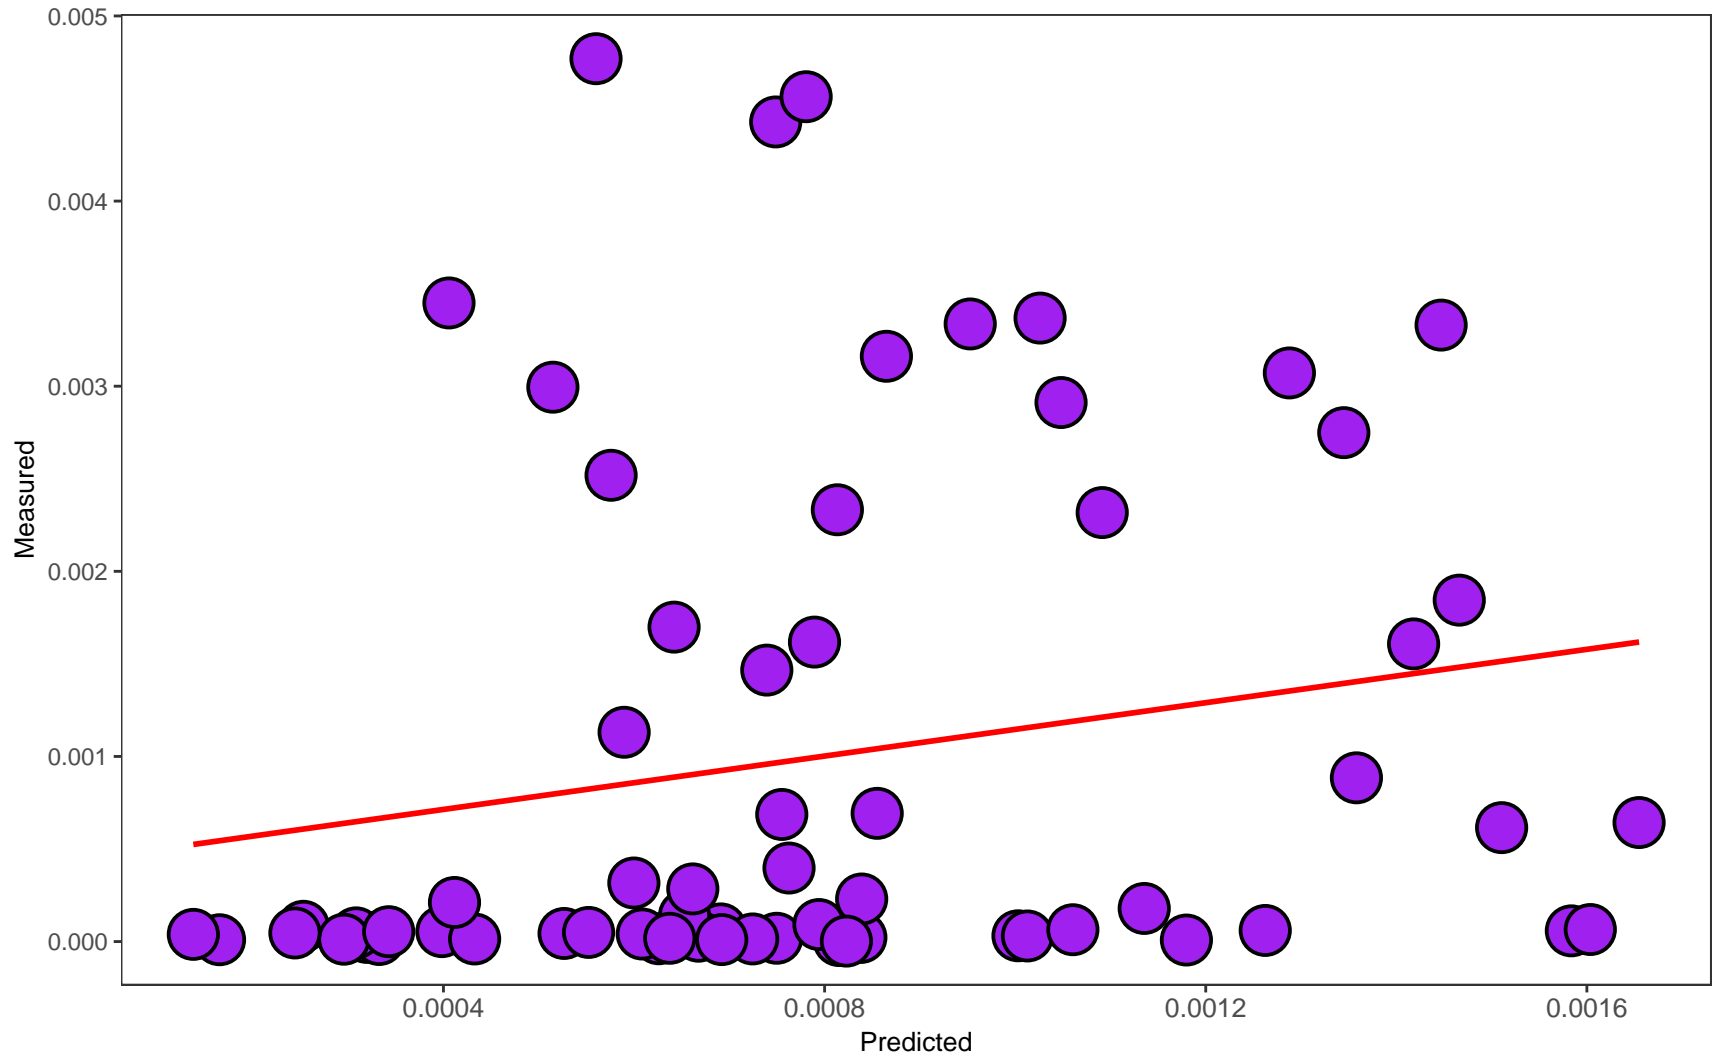

N-acetylputrescine (HILIC-pos\_Cluster\_0086): Spearman 0.54

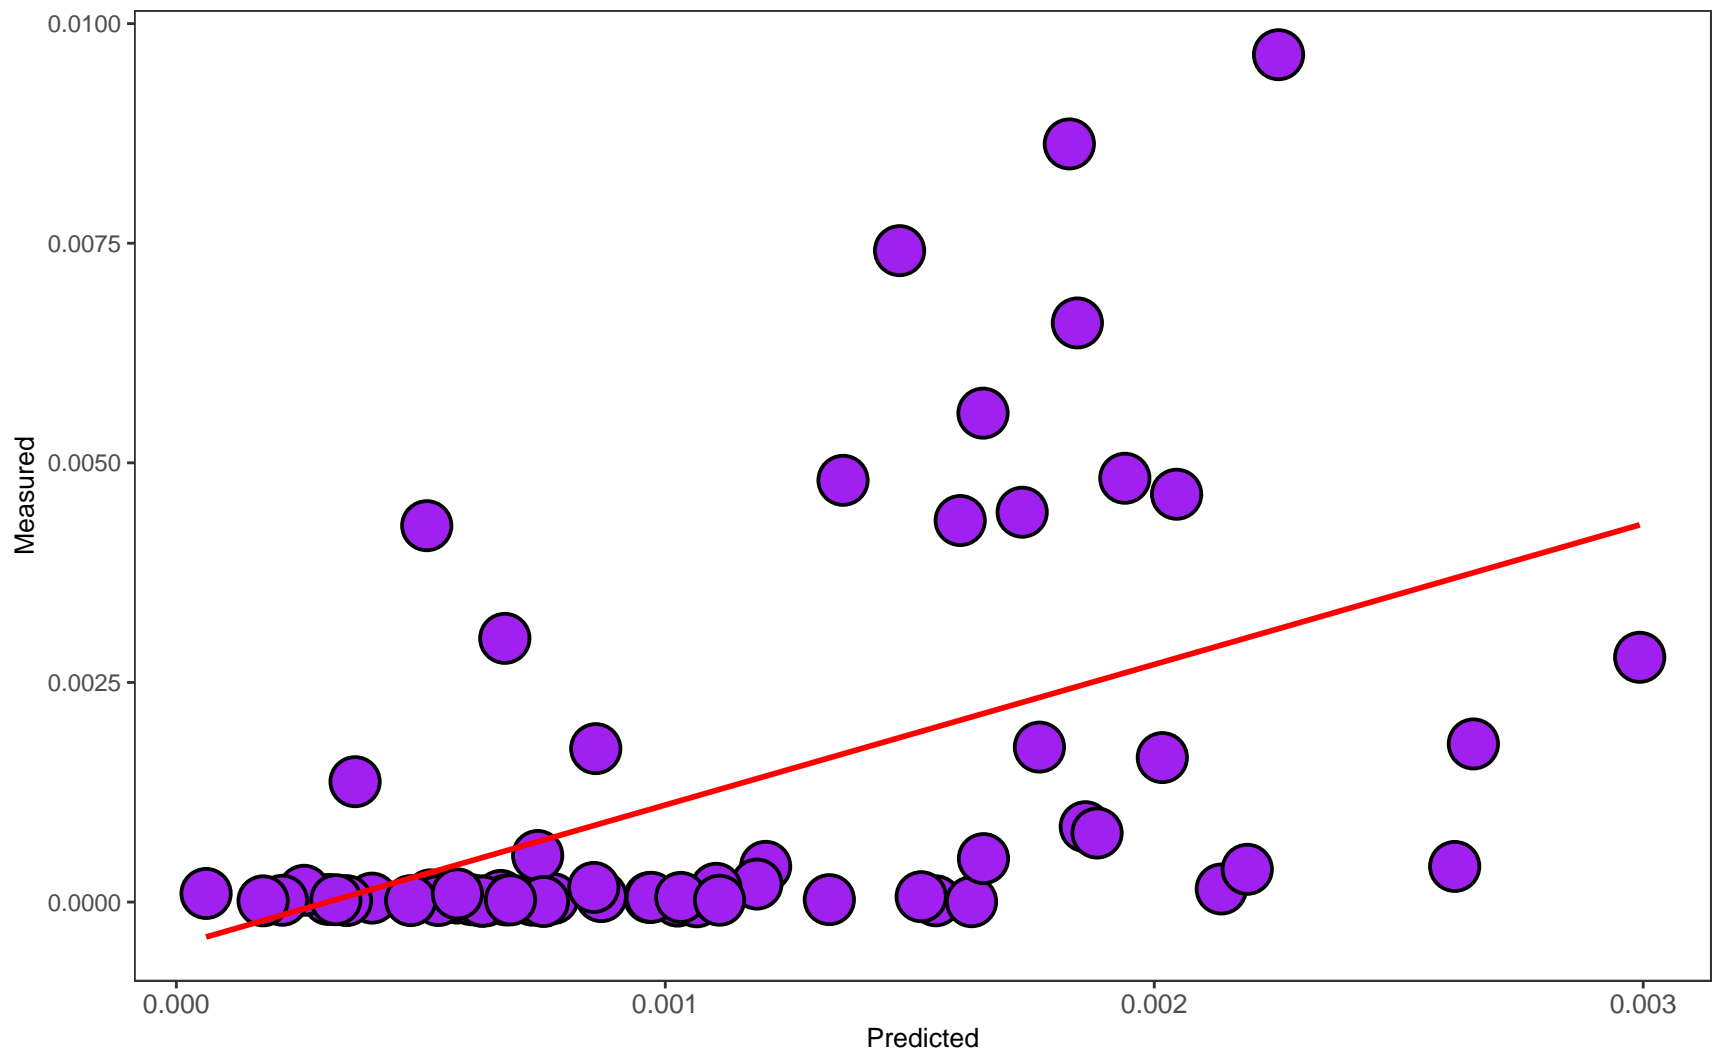



creatine (HILIC-pos\_Cluster\_0090): Spearman 0.36

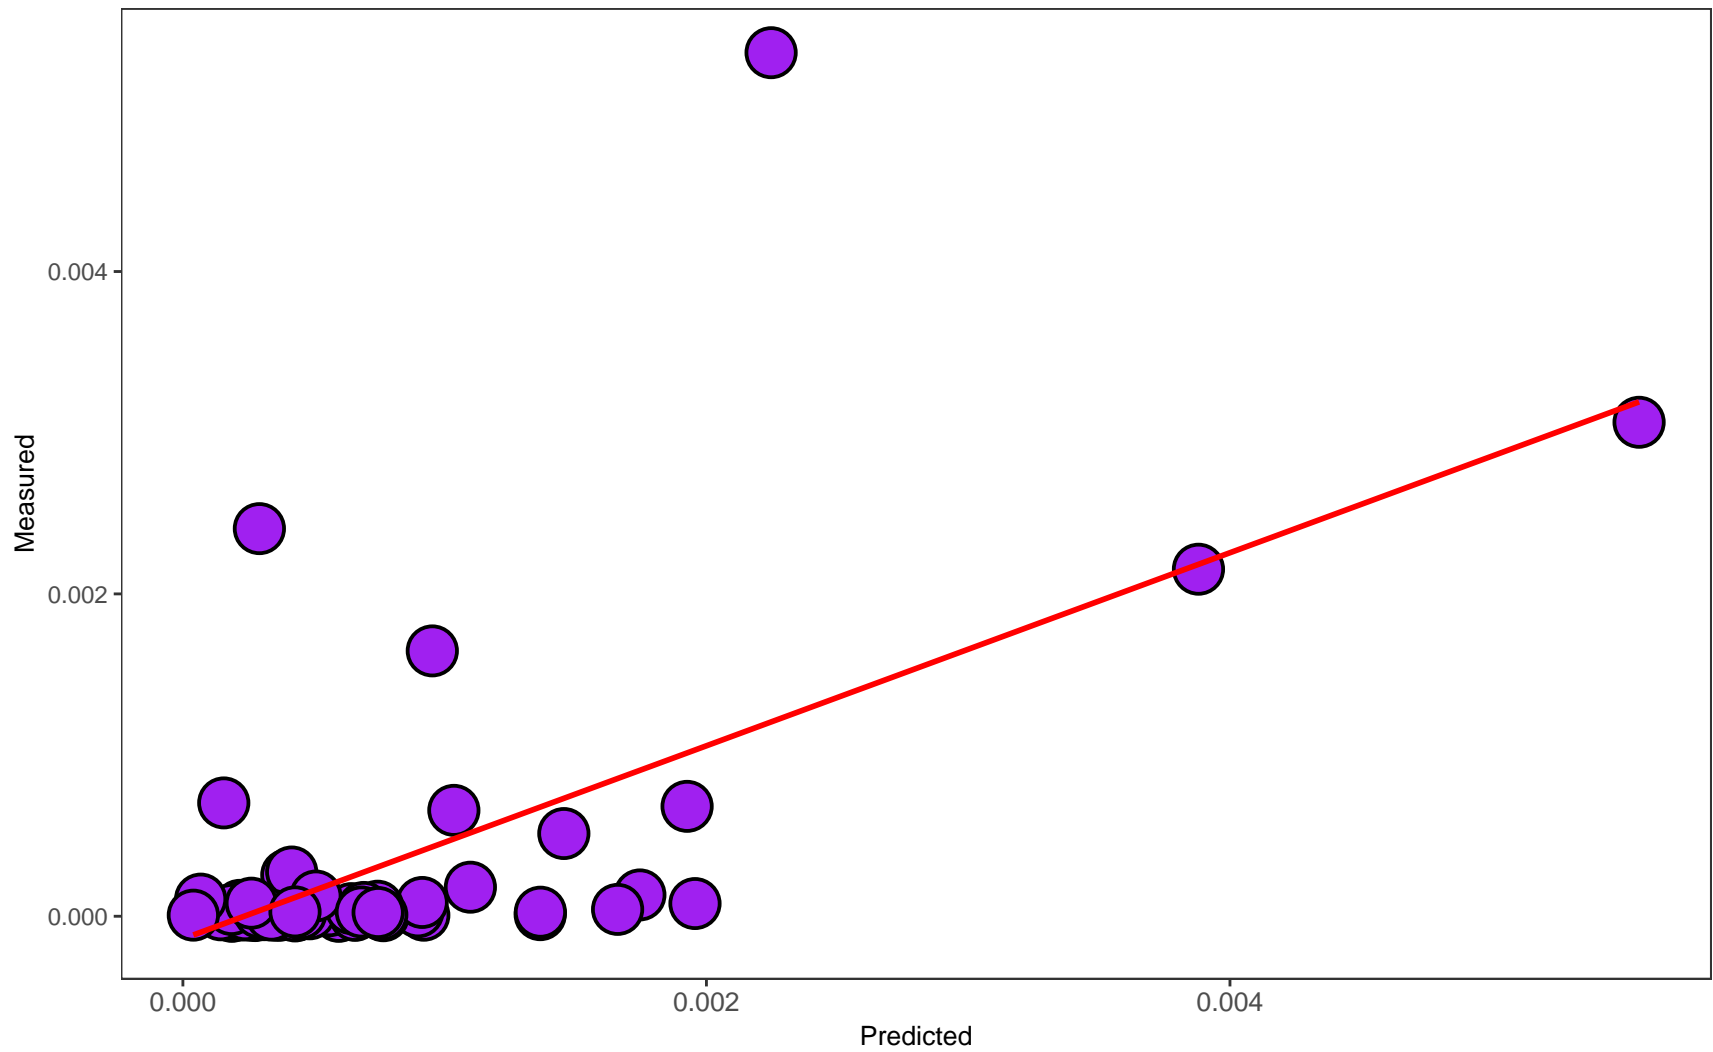

hypoxanthine (HILIC-pos\_Cluster\_0108): Spearman 0.42

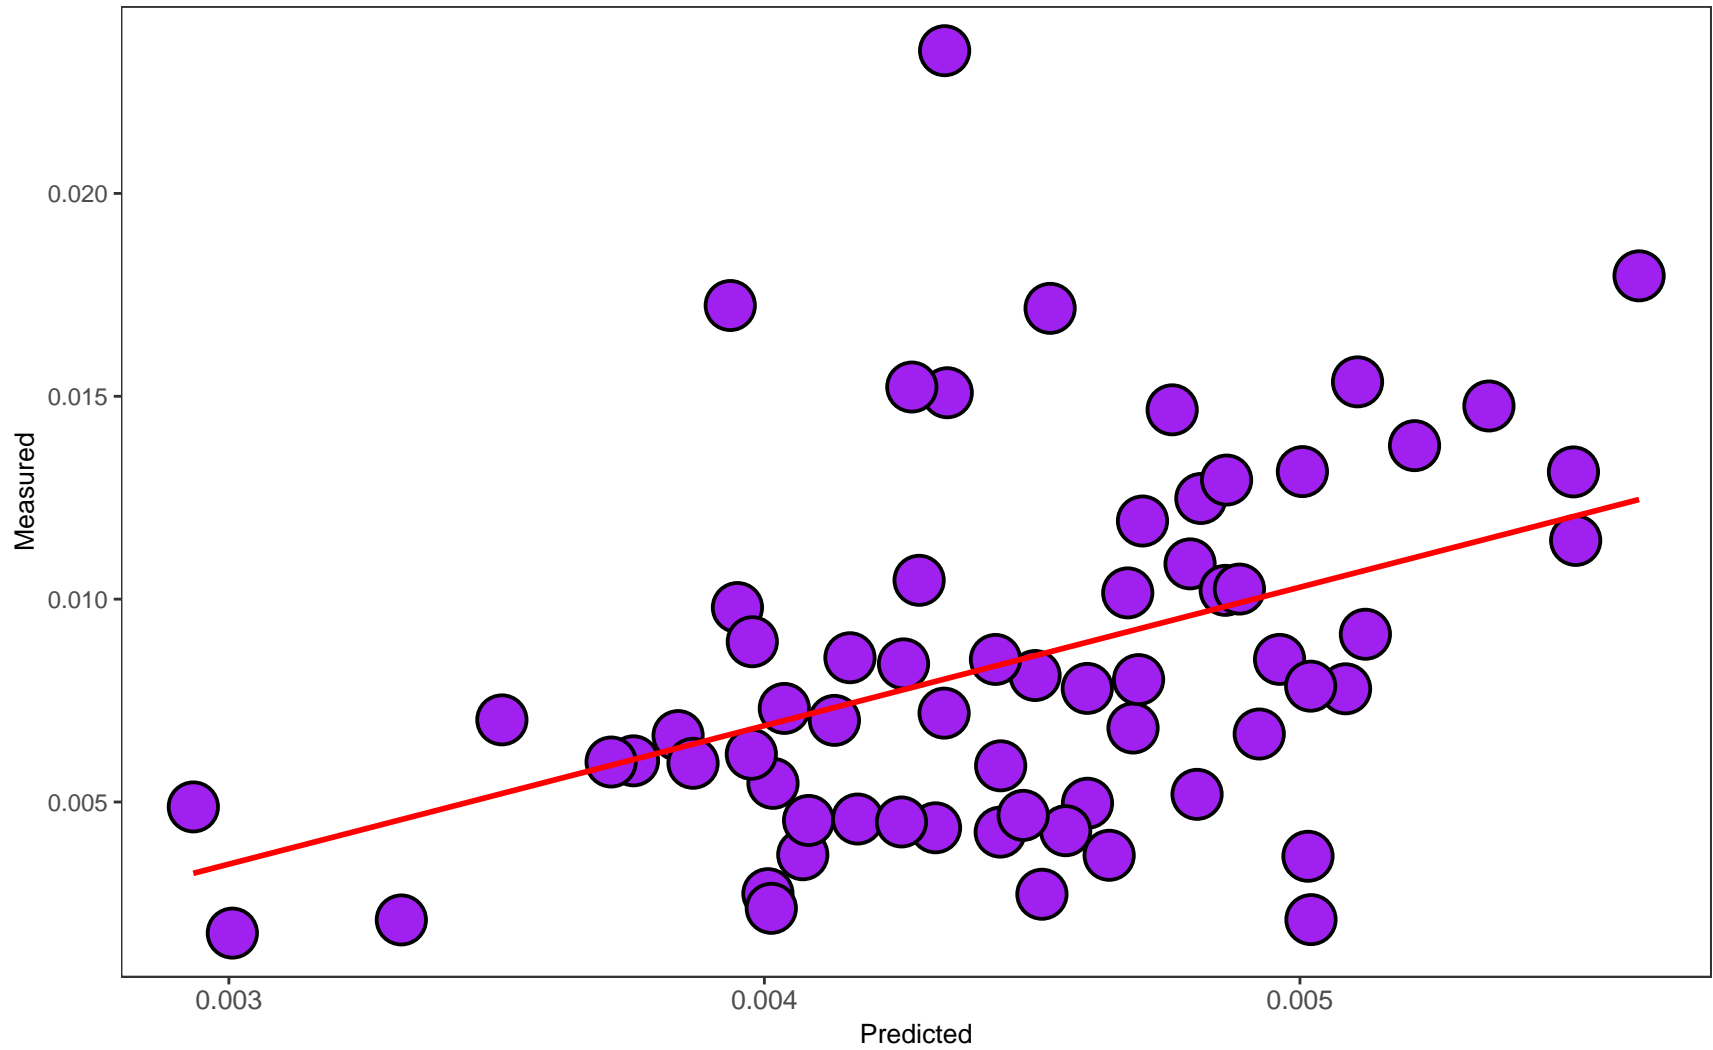

2-hydroxyphenethylamine (HILIC-pos\_Cluster\_0114): Spearman 0.39

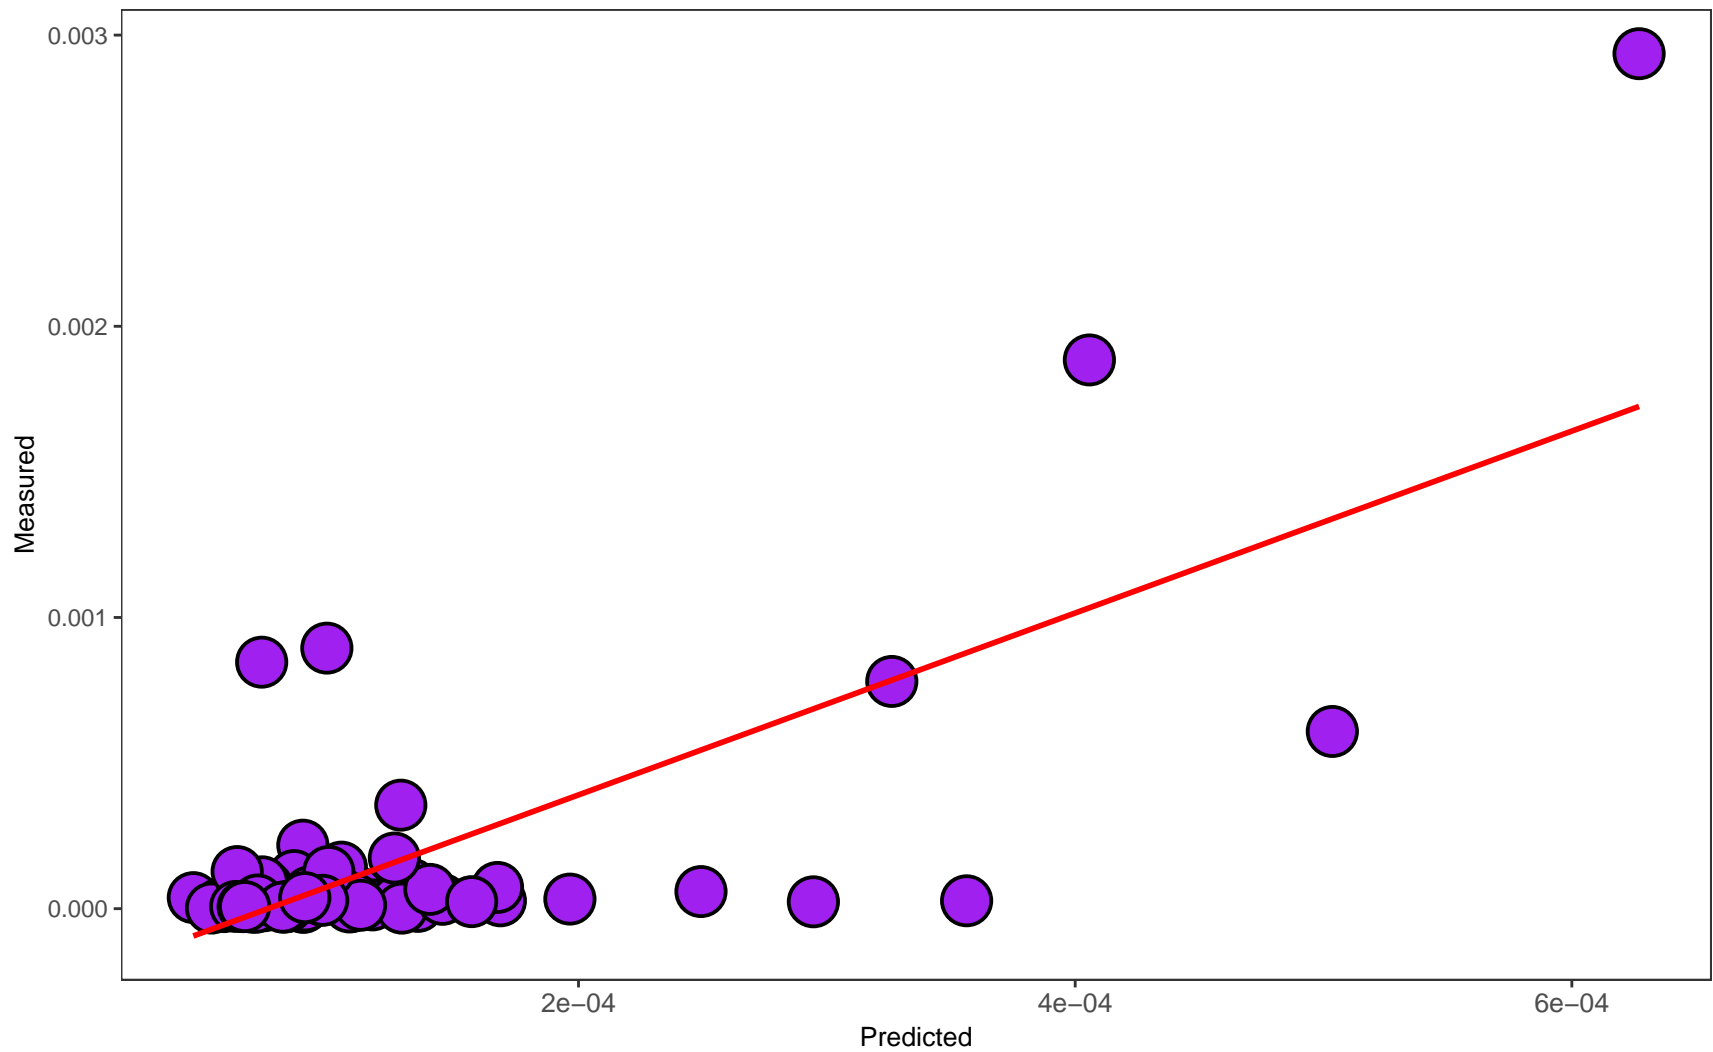

imidazole propionate (HILIC-pos\_Cluster\_0121): Spearman 0.53

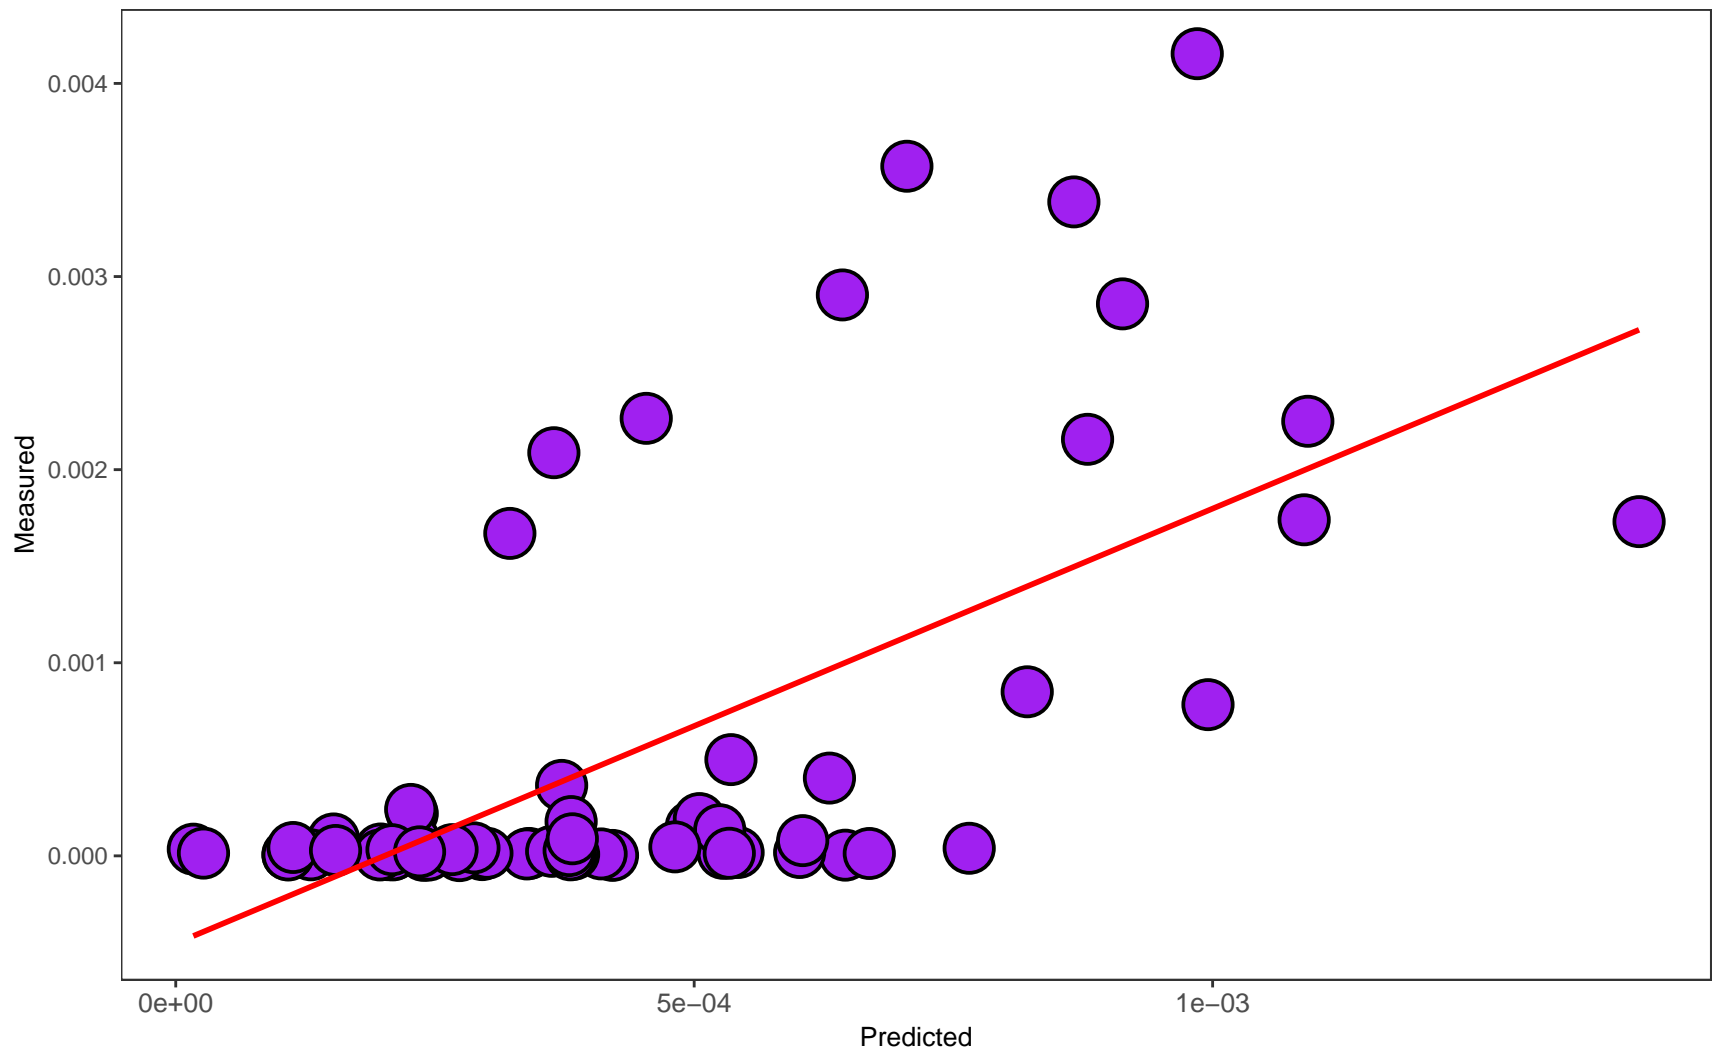

pyridoxamine (HILIC-pos\_Cluster\_0184): Spearman 0.33

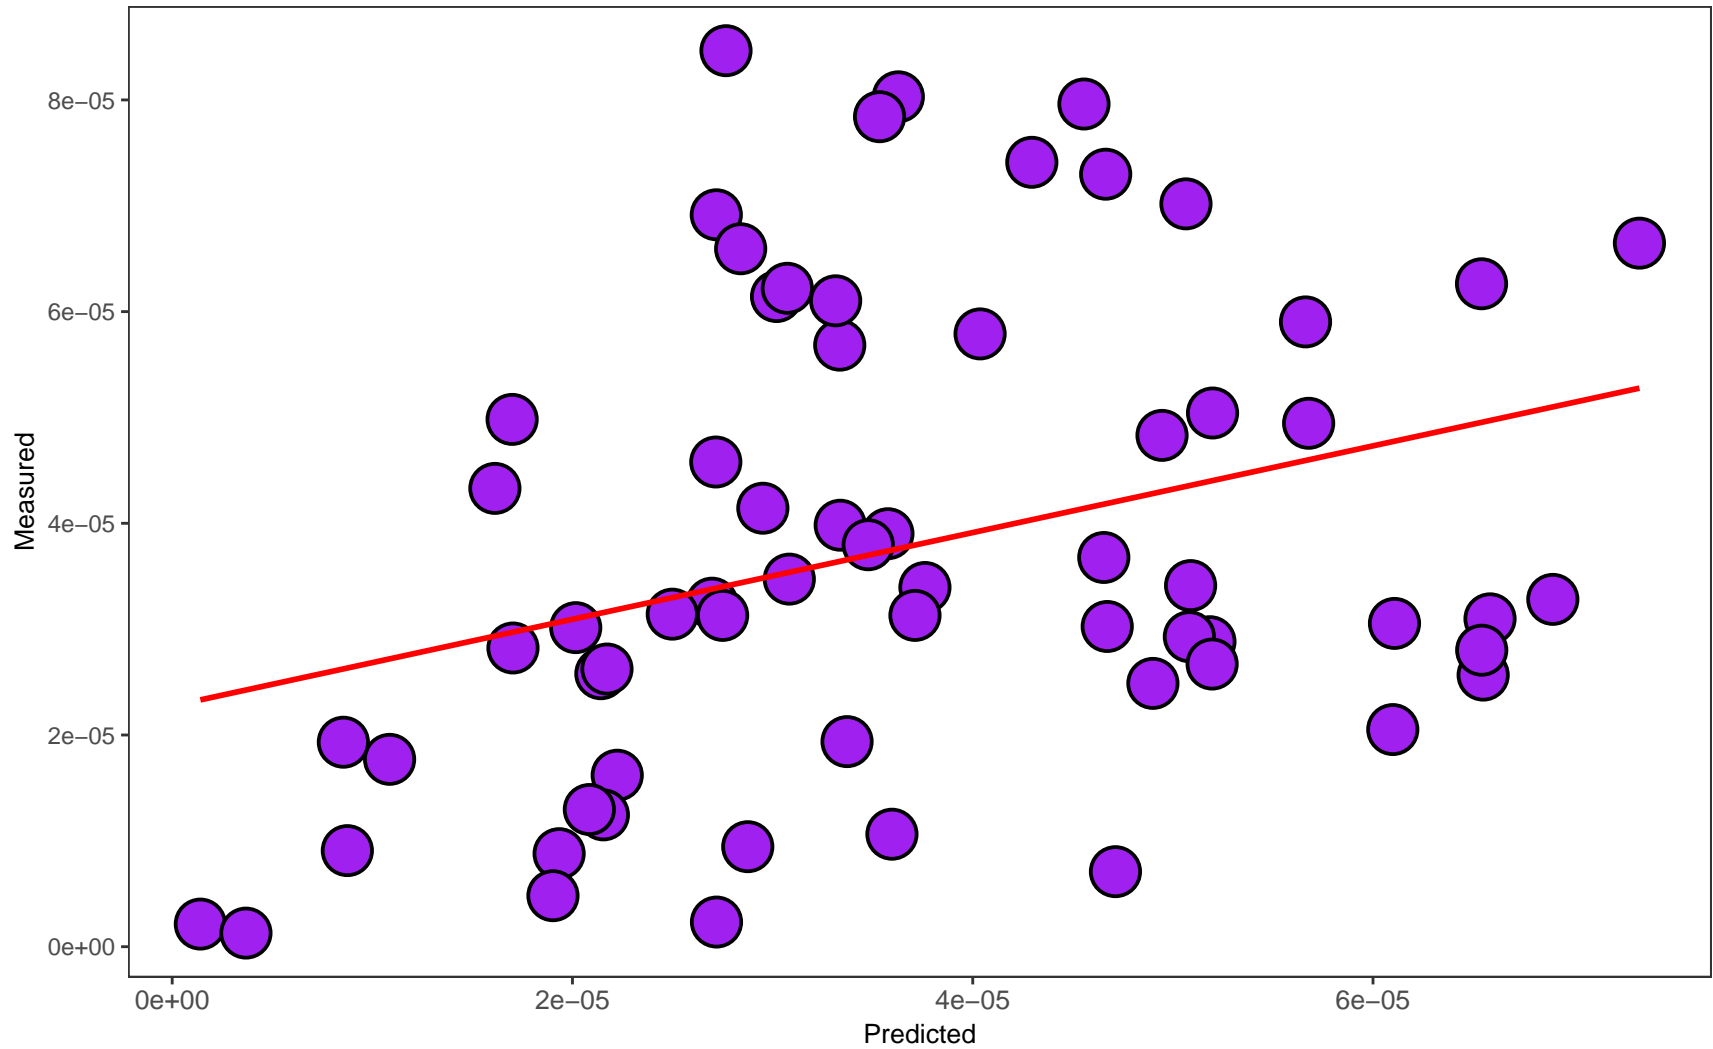

7-methylguanine (HILIC-pos\_Cluster\_0246): Spearman 0.41

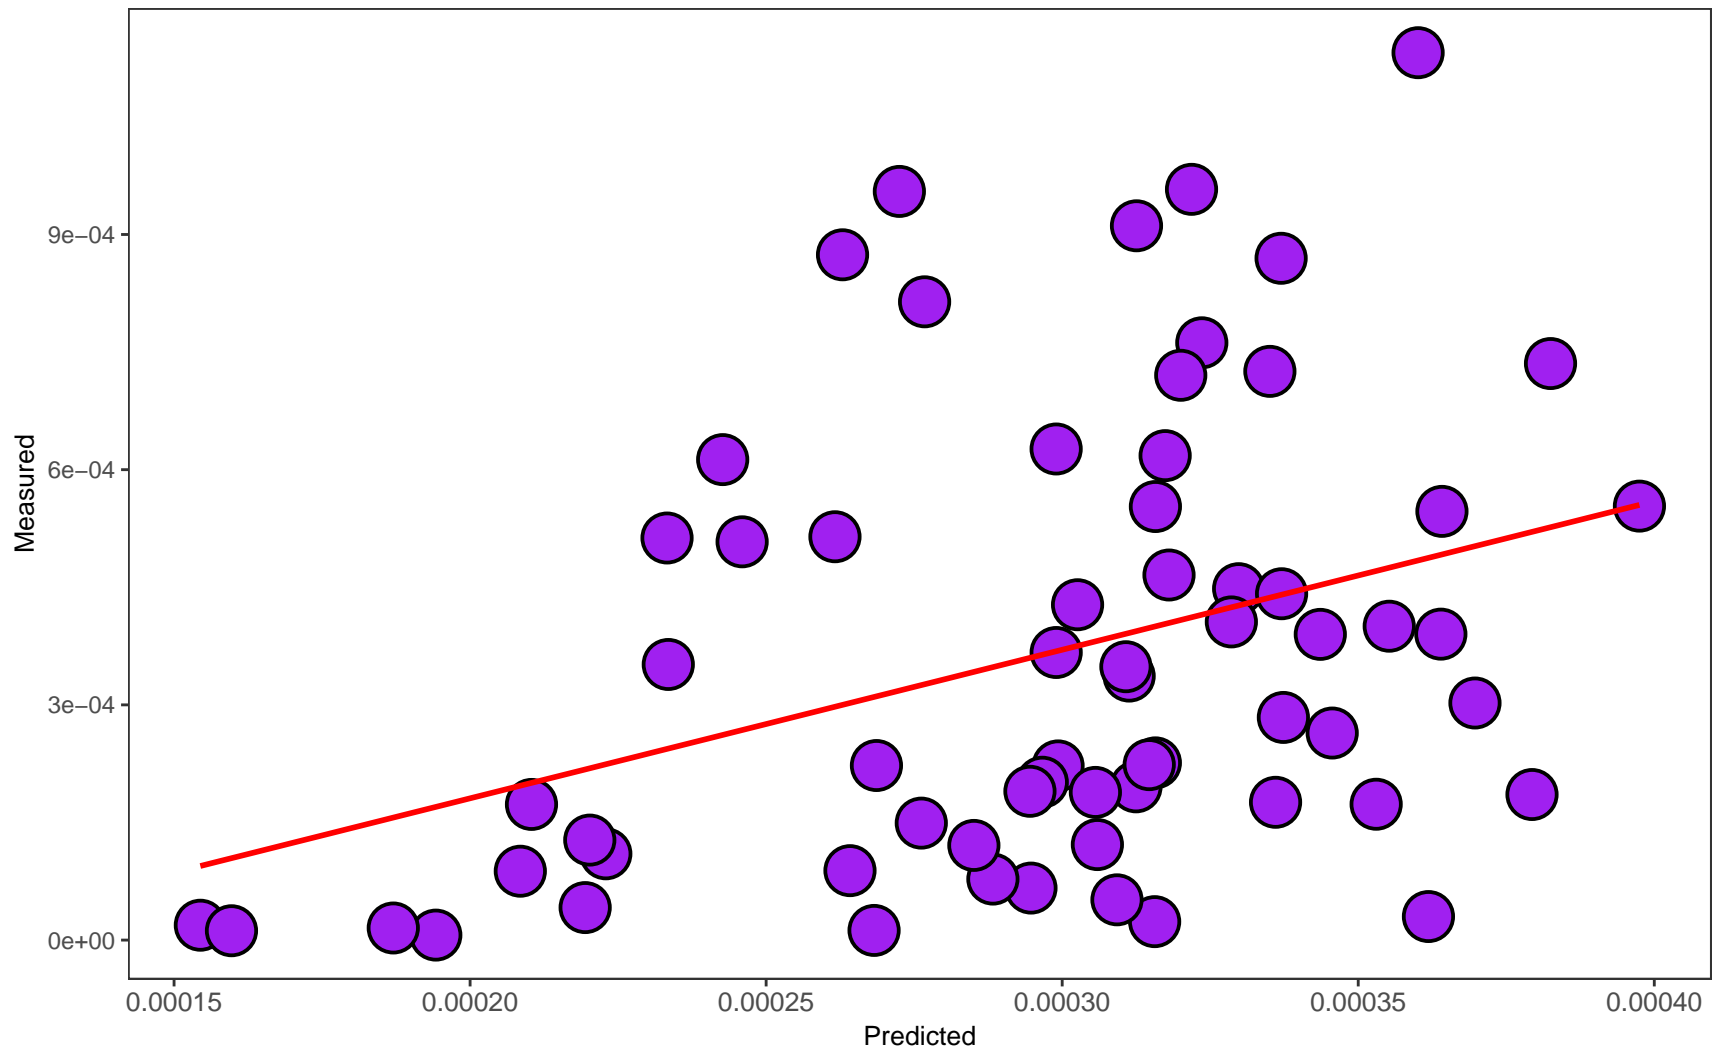

3-methylxanthine (HILIC-pos\_Cluster\_0254): Spearman 0.36

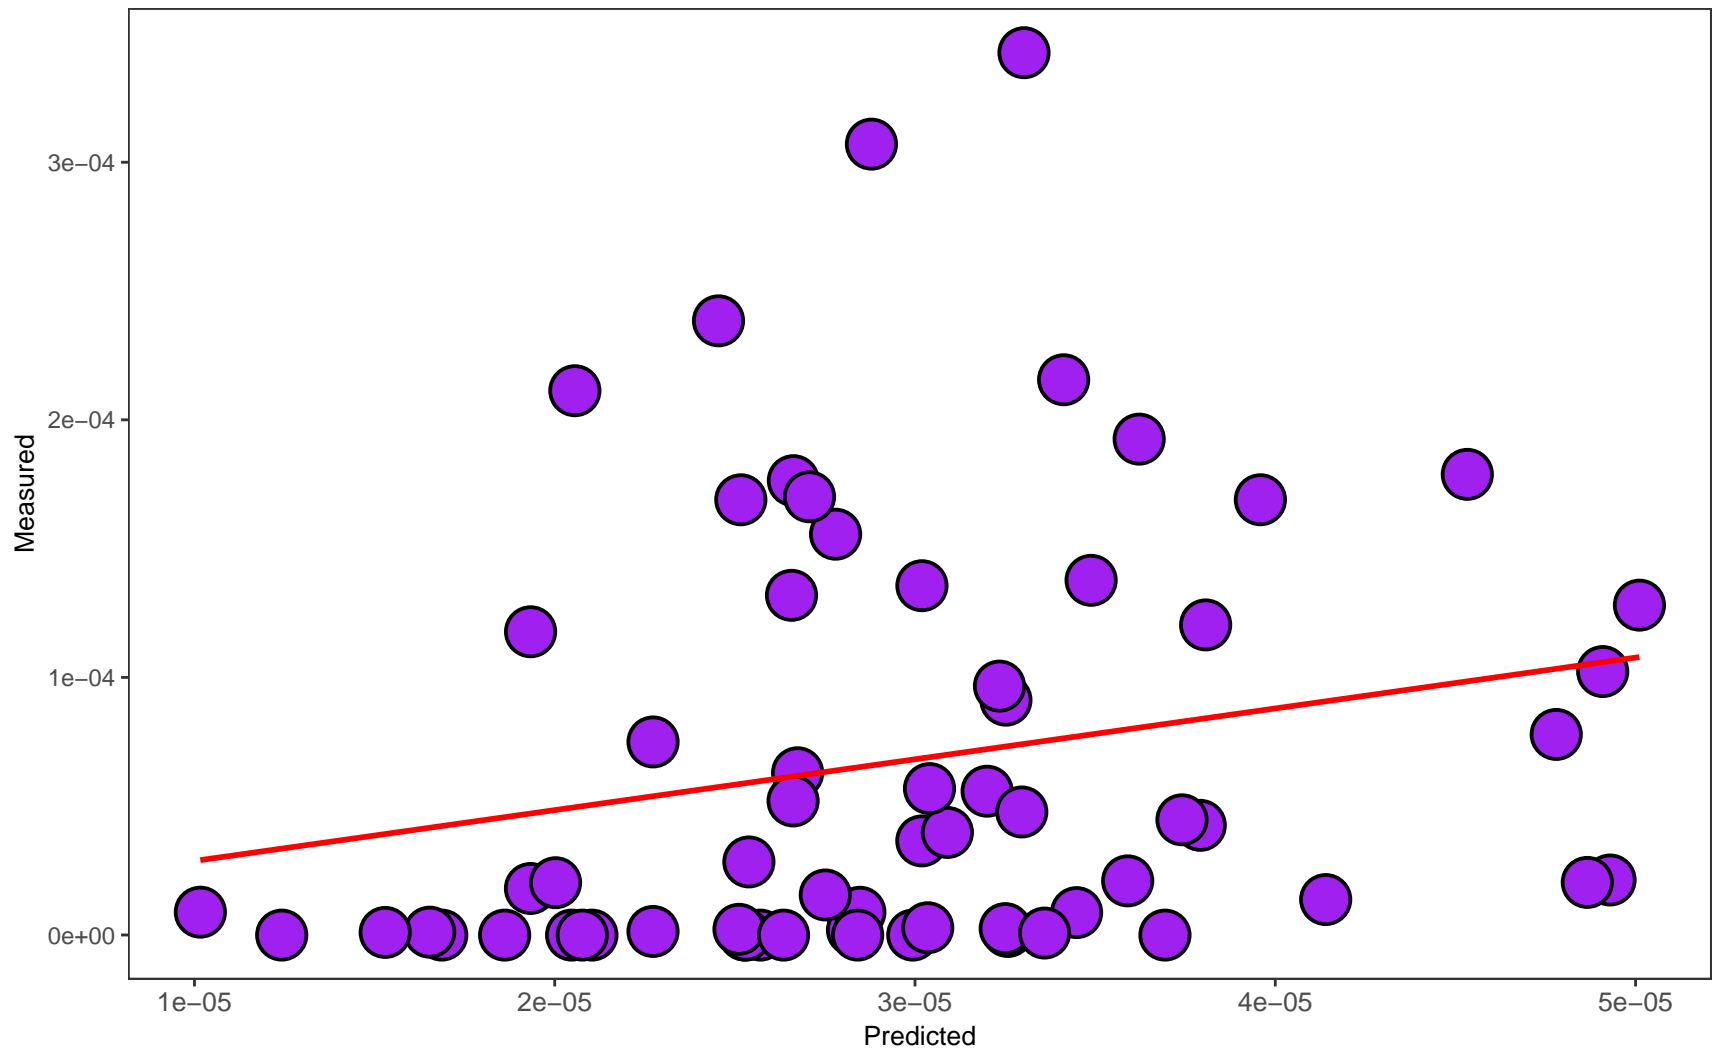

pyridoxamine (HILIC-pos\_Cluster\_0268): Spearman 0.33

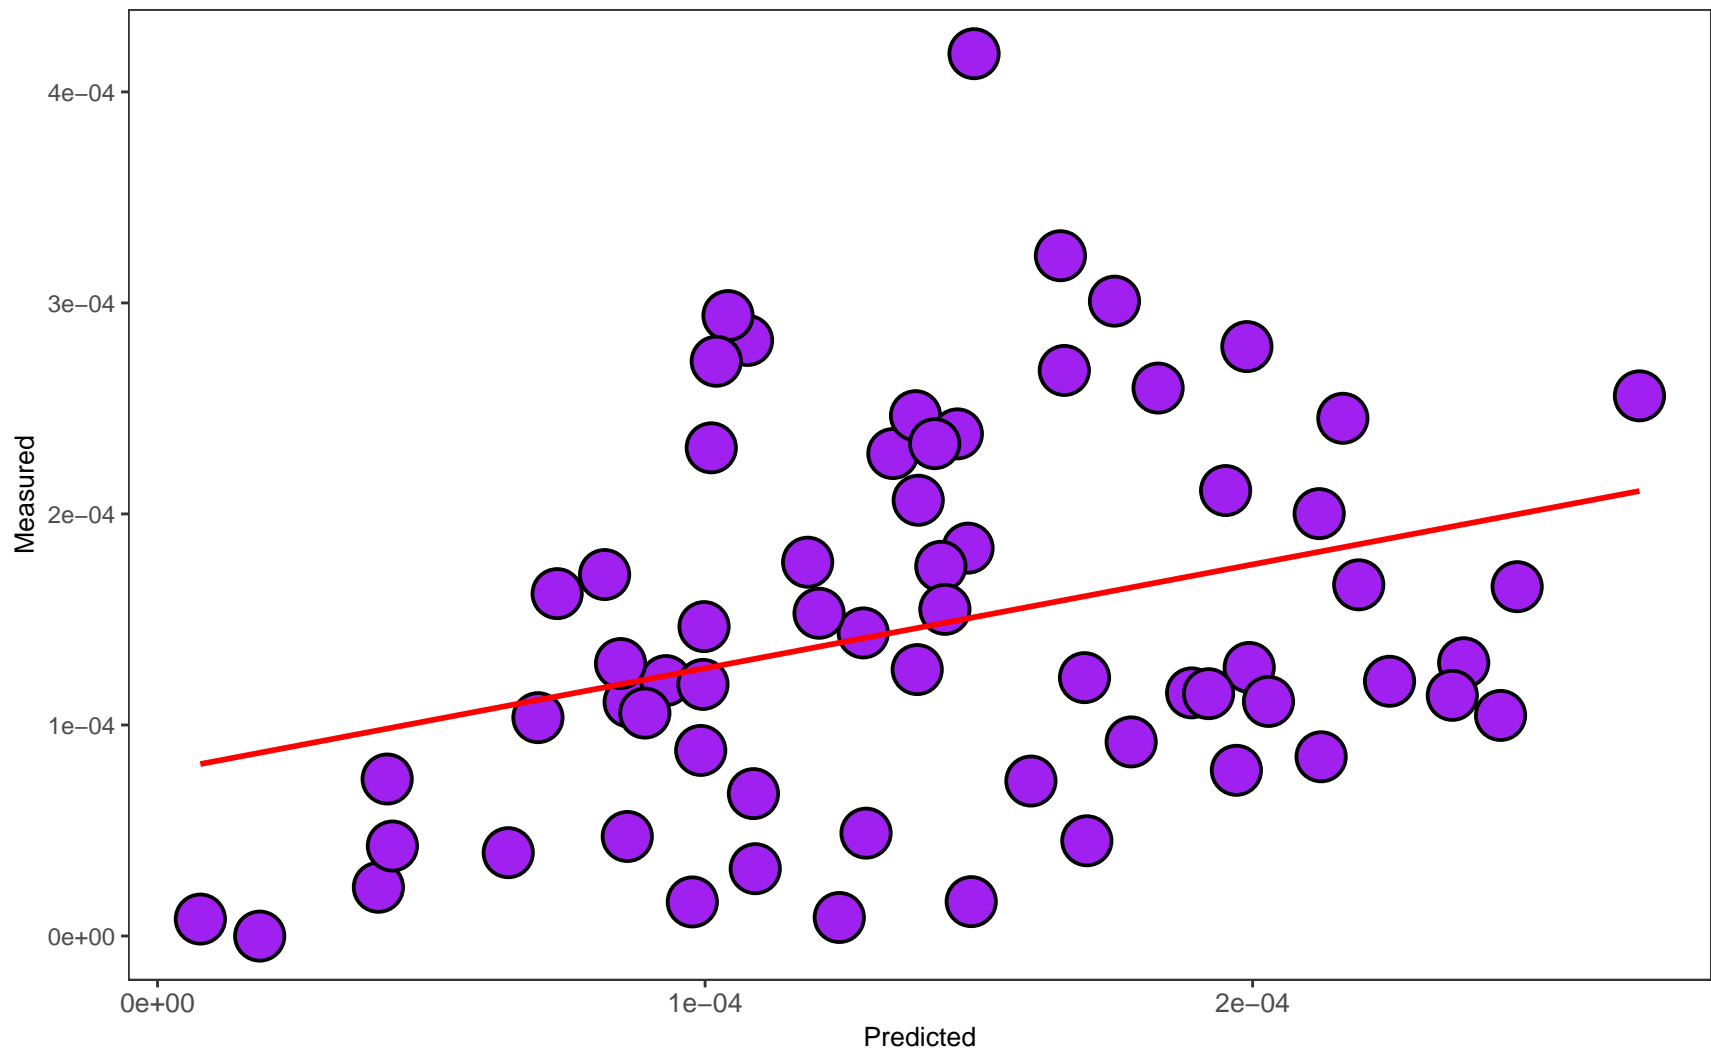



dimethyllysine (HILIC-pos\_Cluster\_0298): Spearman 0.35

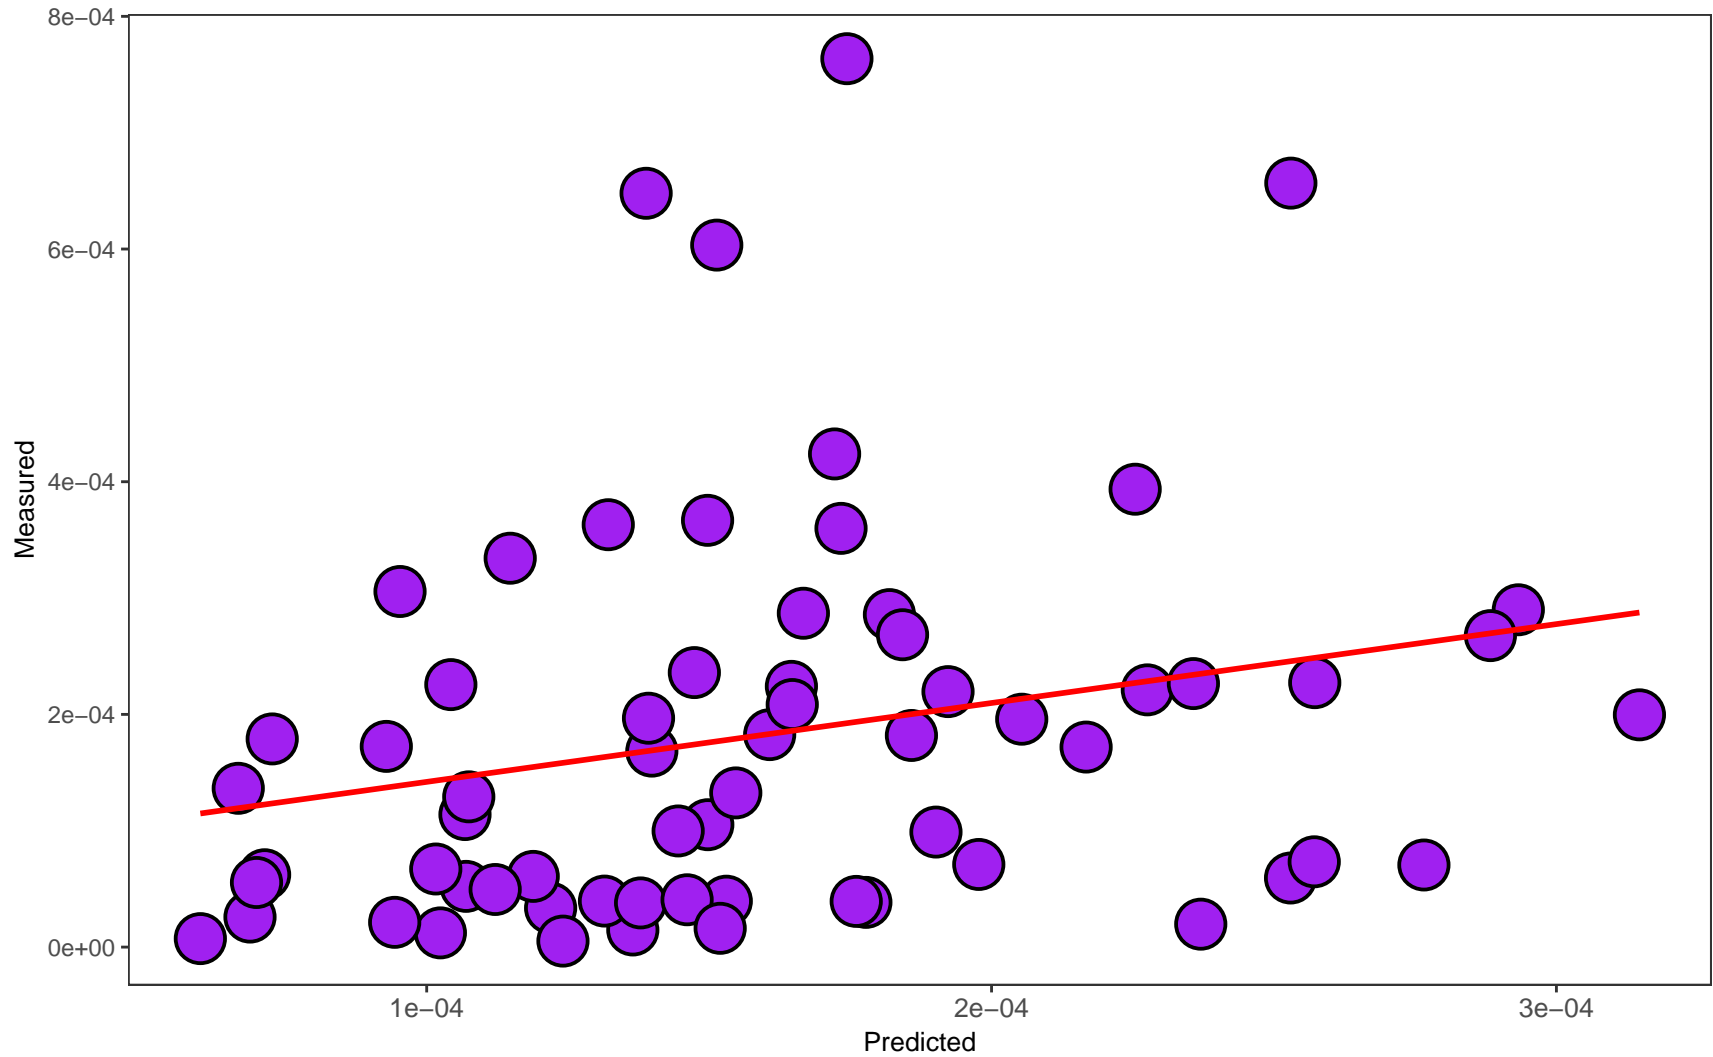

N-acetylspermidine (HILIC-pos\_Cluster\_0374): Spearman 0.51

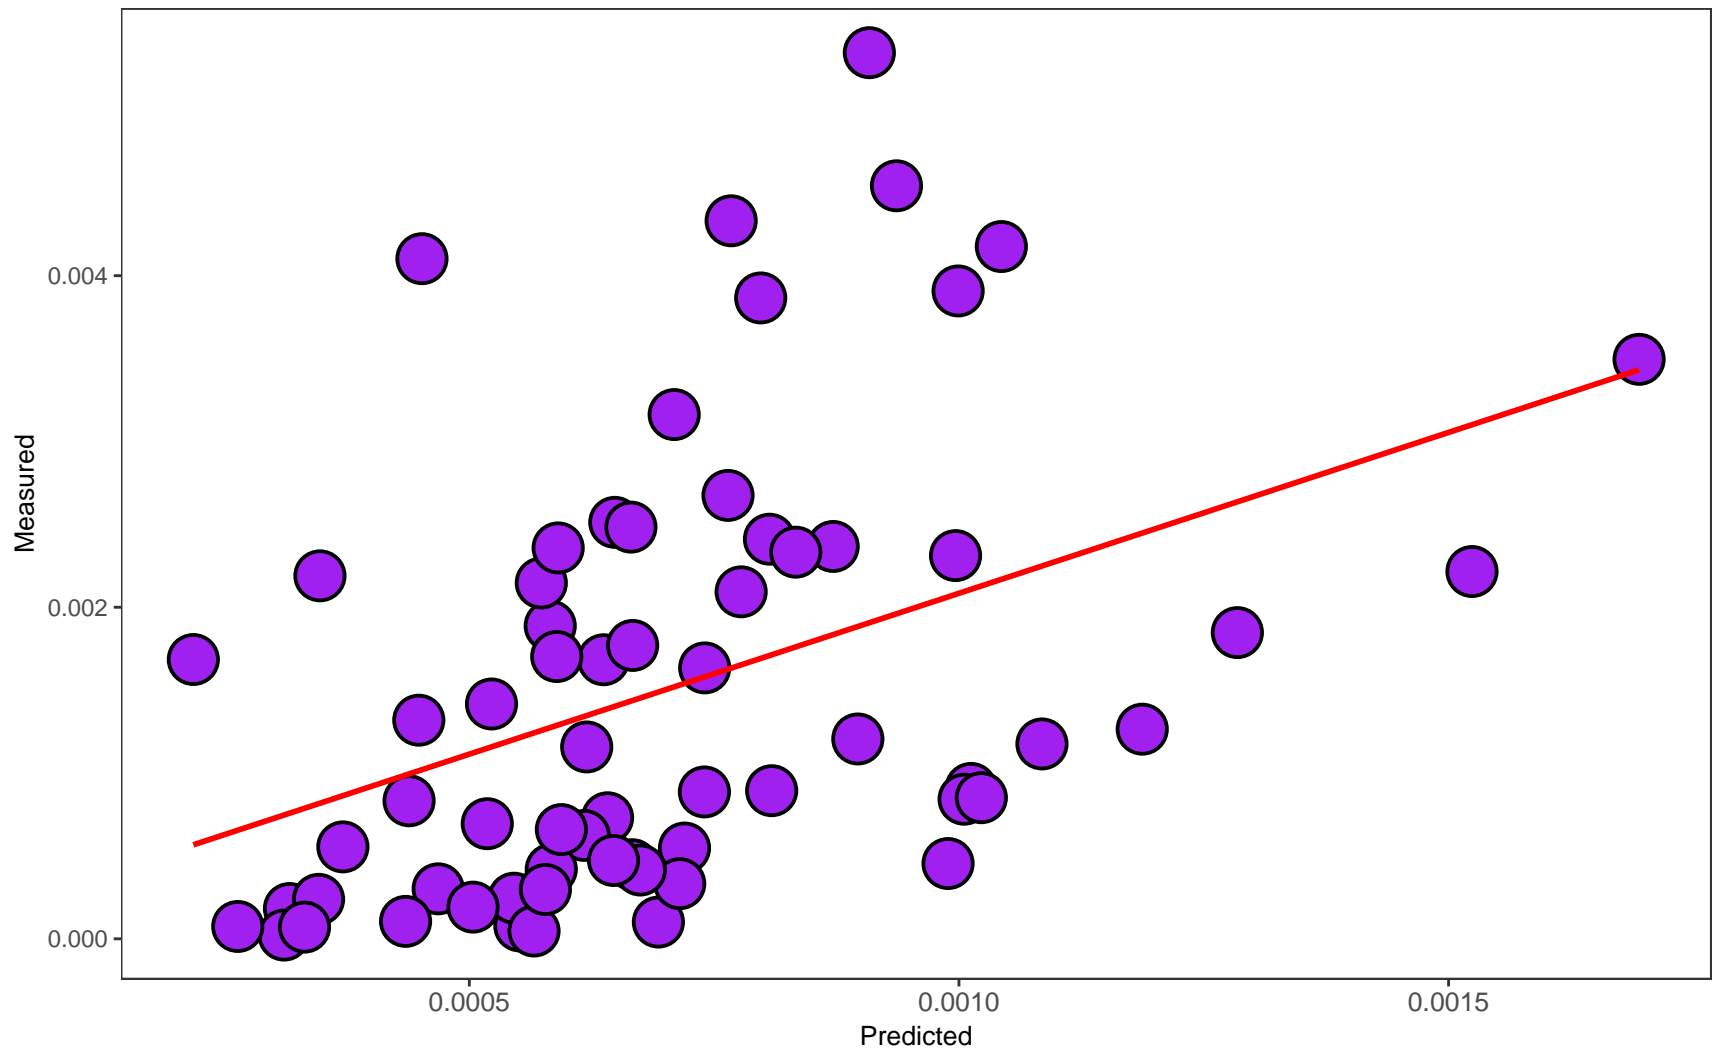

trimethyllysine (HILIC-pos\_Cluster\_0379): Spearman 0.32

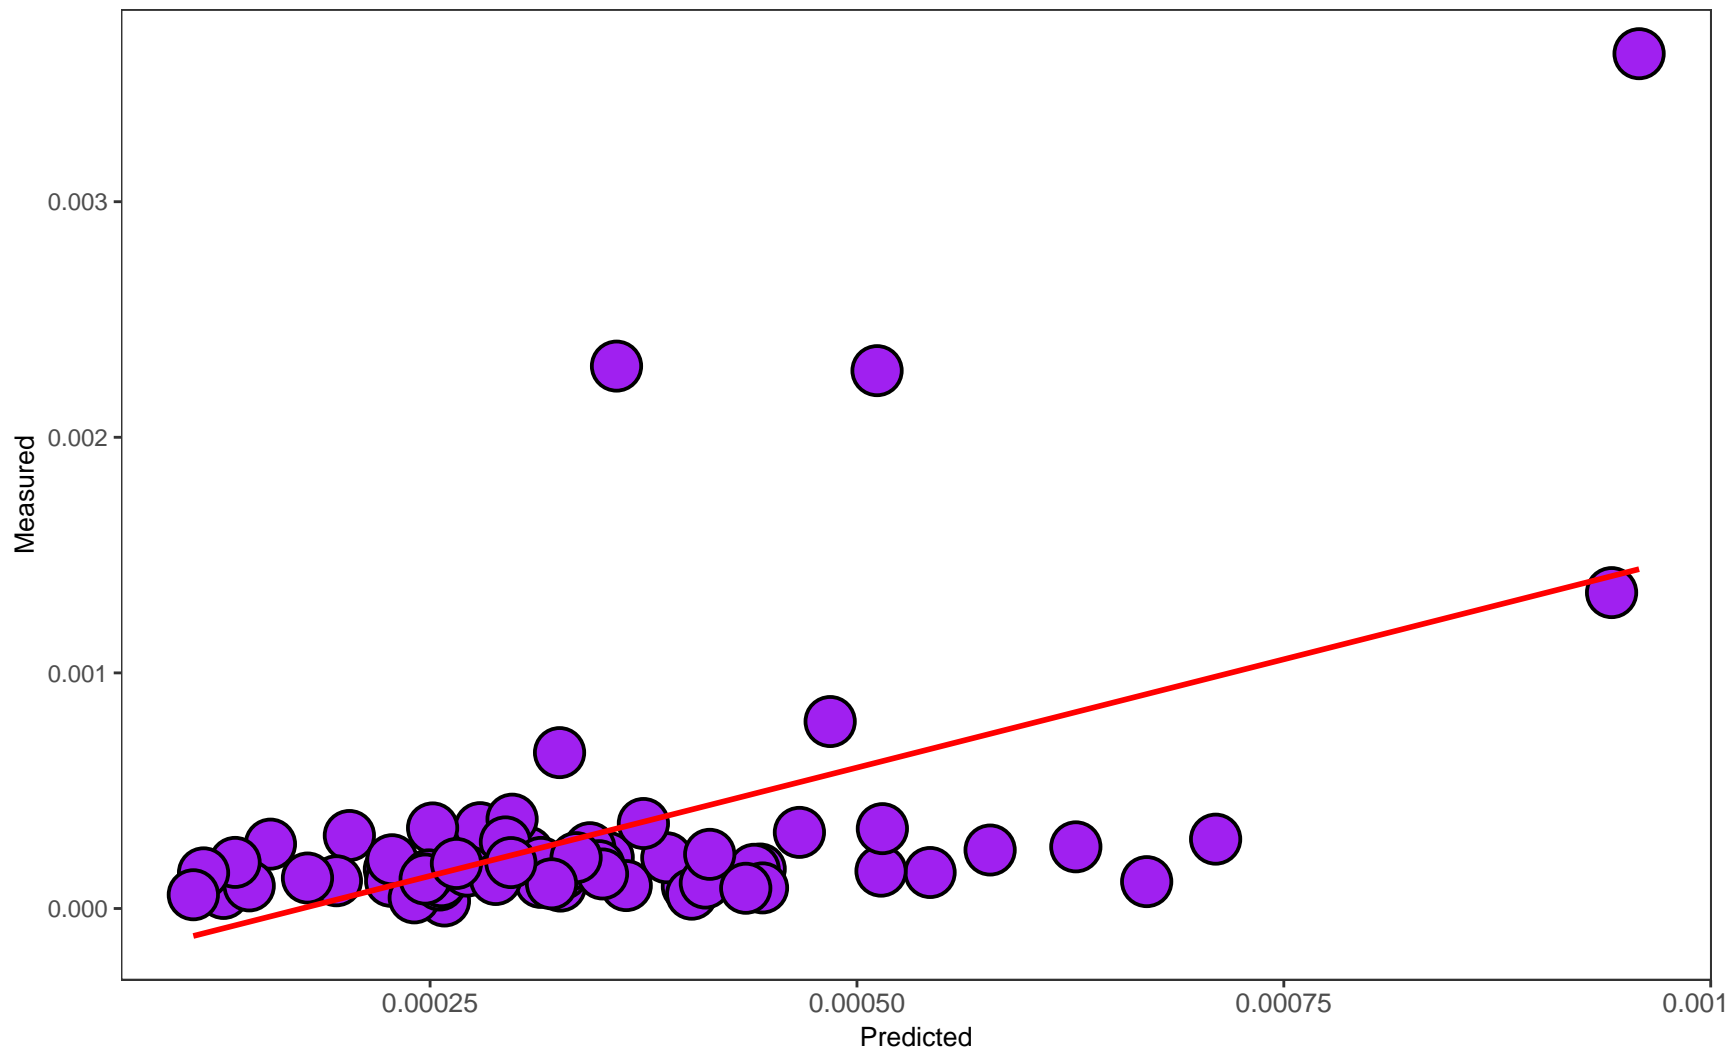

N-acetylglutamic acid (HILIC-pos\_Cluster\_0384): Spearman 0.45

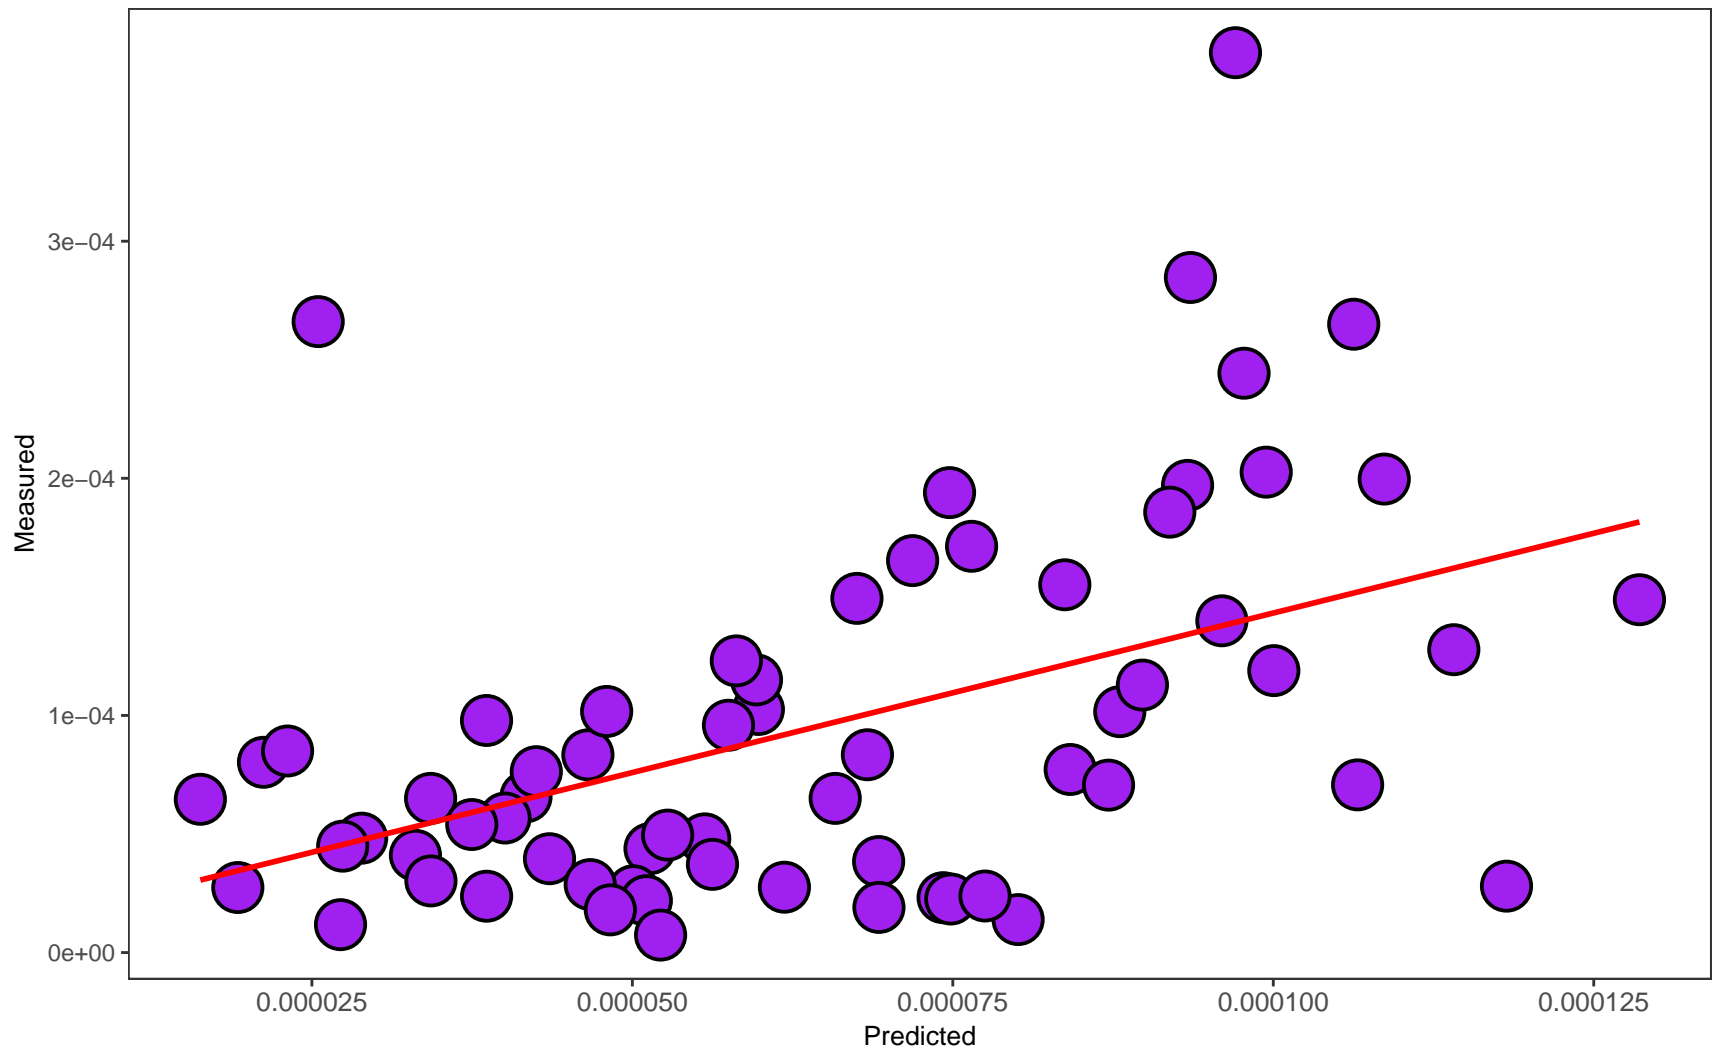

N-acetylhistidine (HILIC-pos\_Cluster\_0419): Spearman 0.33

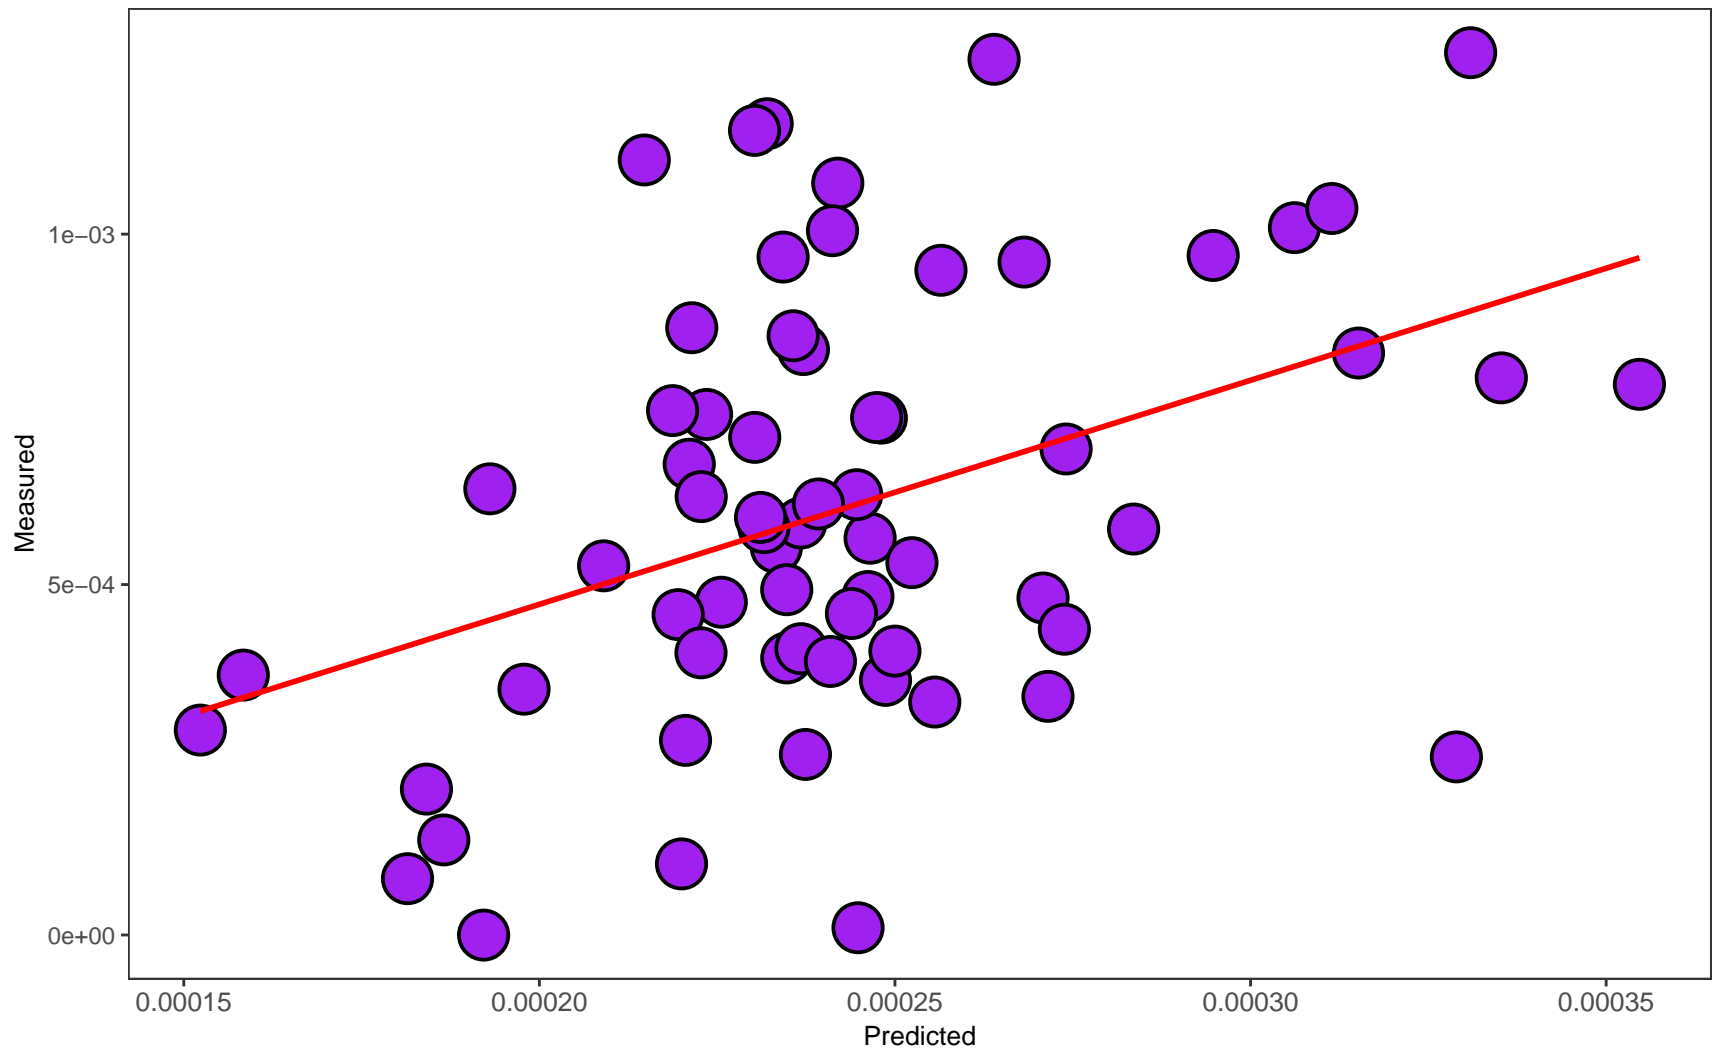

ADMA/SDMA\* (HILIC-pos\_Cluster\_0446): Spearman 0.48

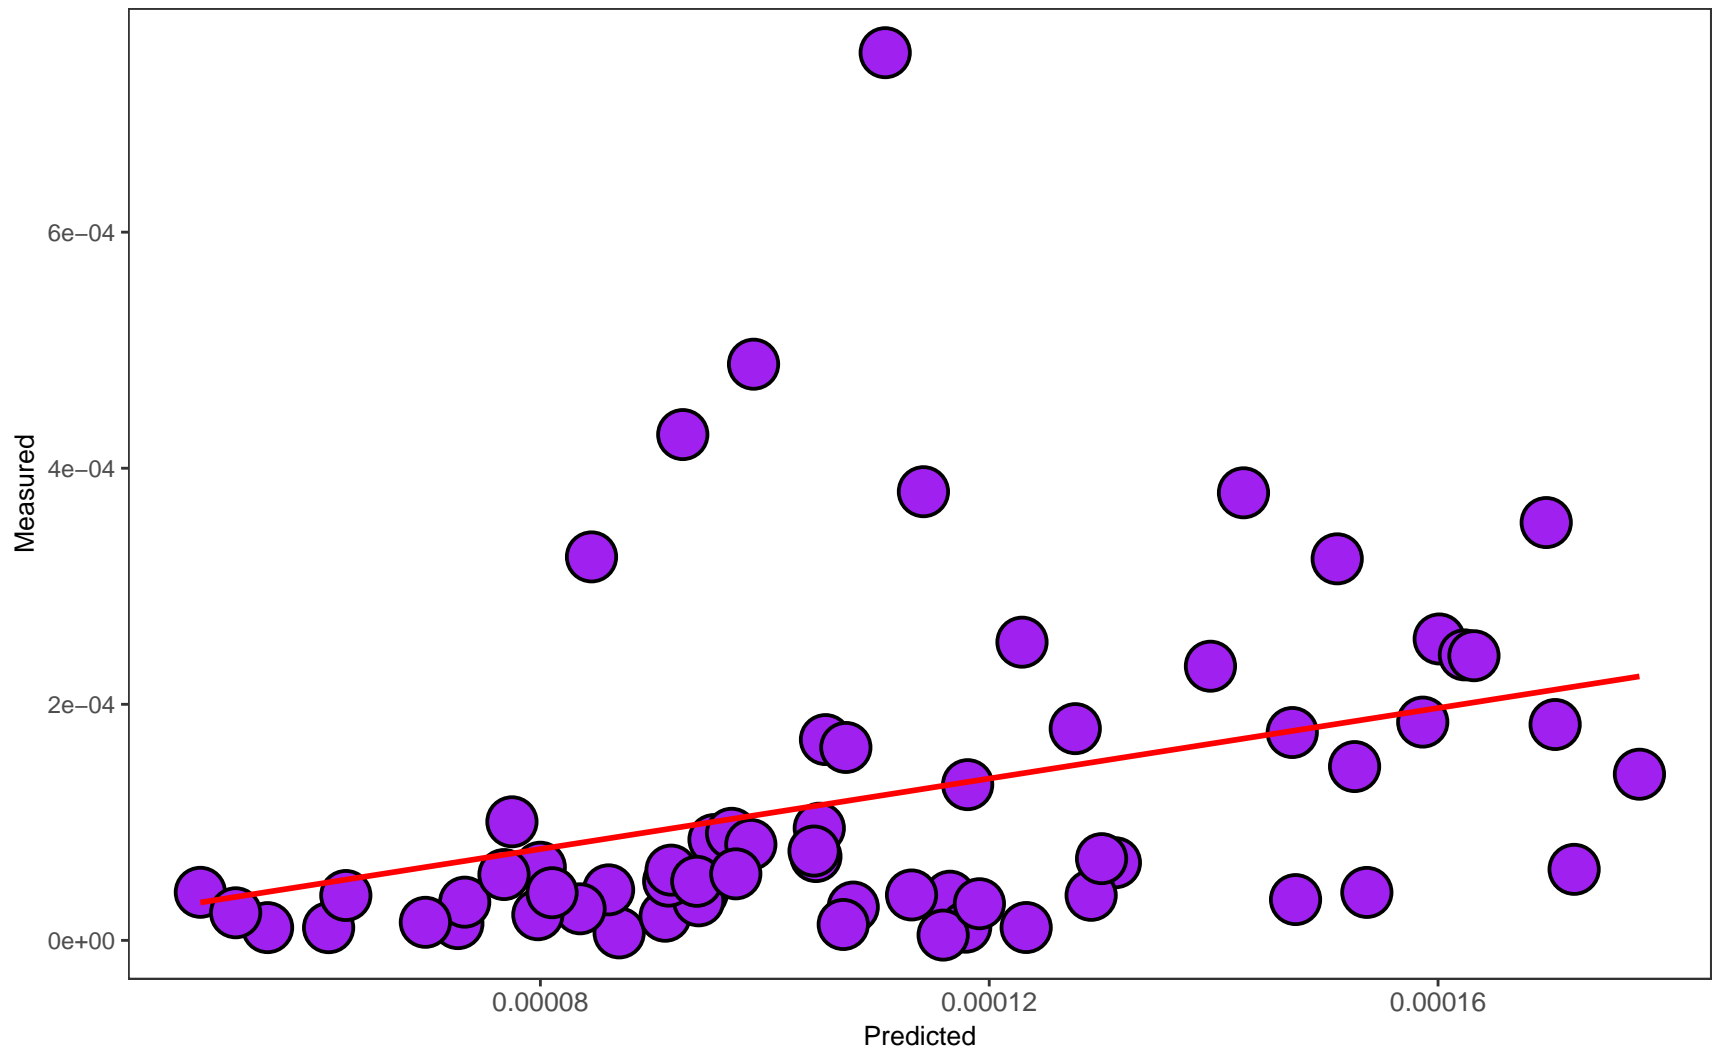

ADMA (HILIC-pos\_Cluster\_0447): Spearman 0.47

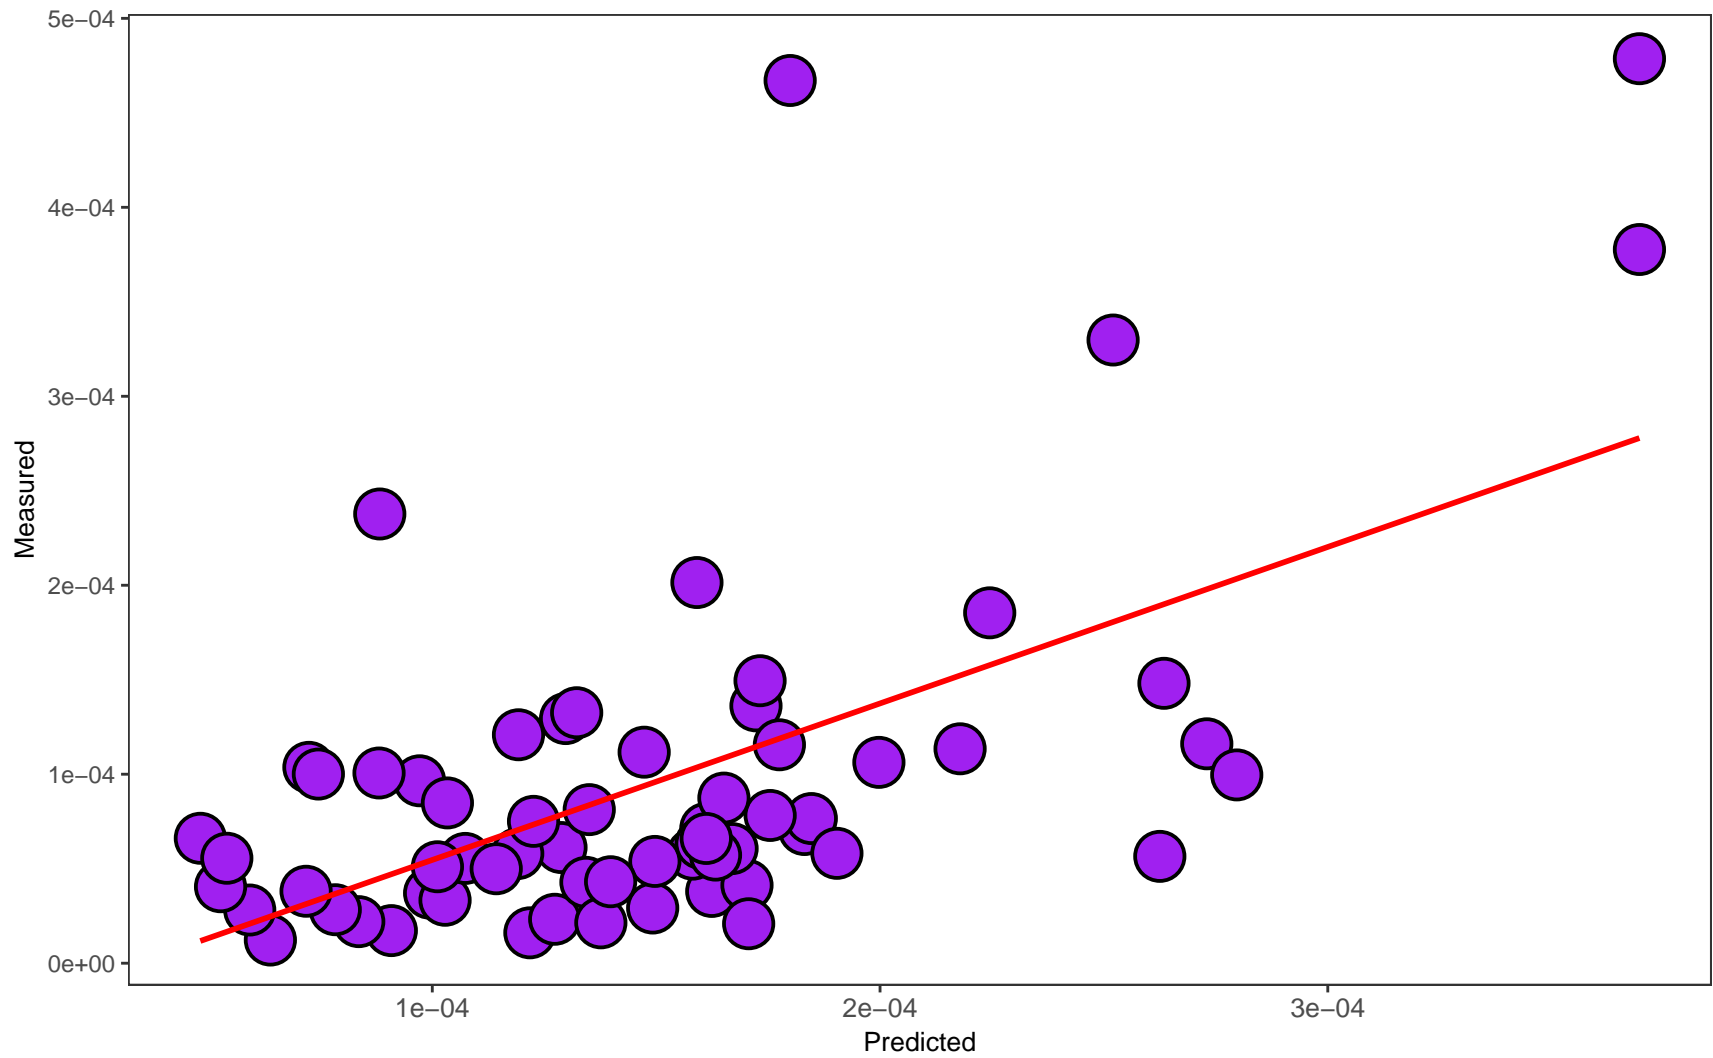

C2 carnitine (HILIC-pos\_Cluster\_0453): Spearman 0.39

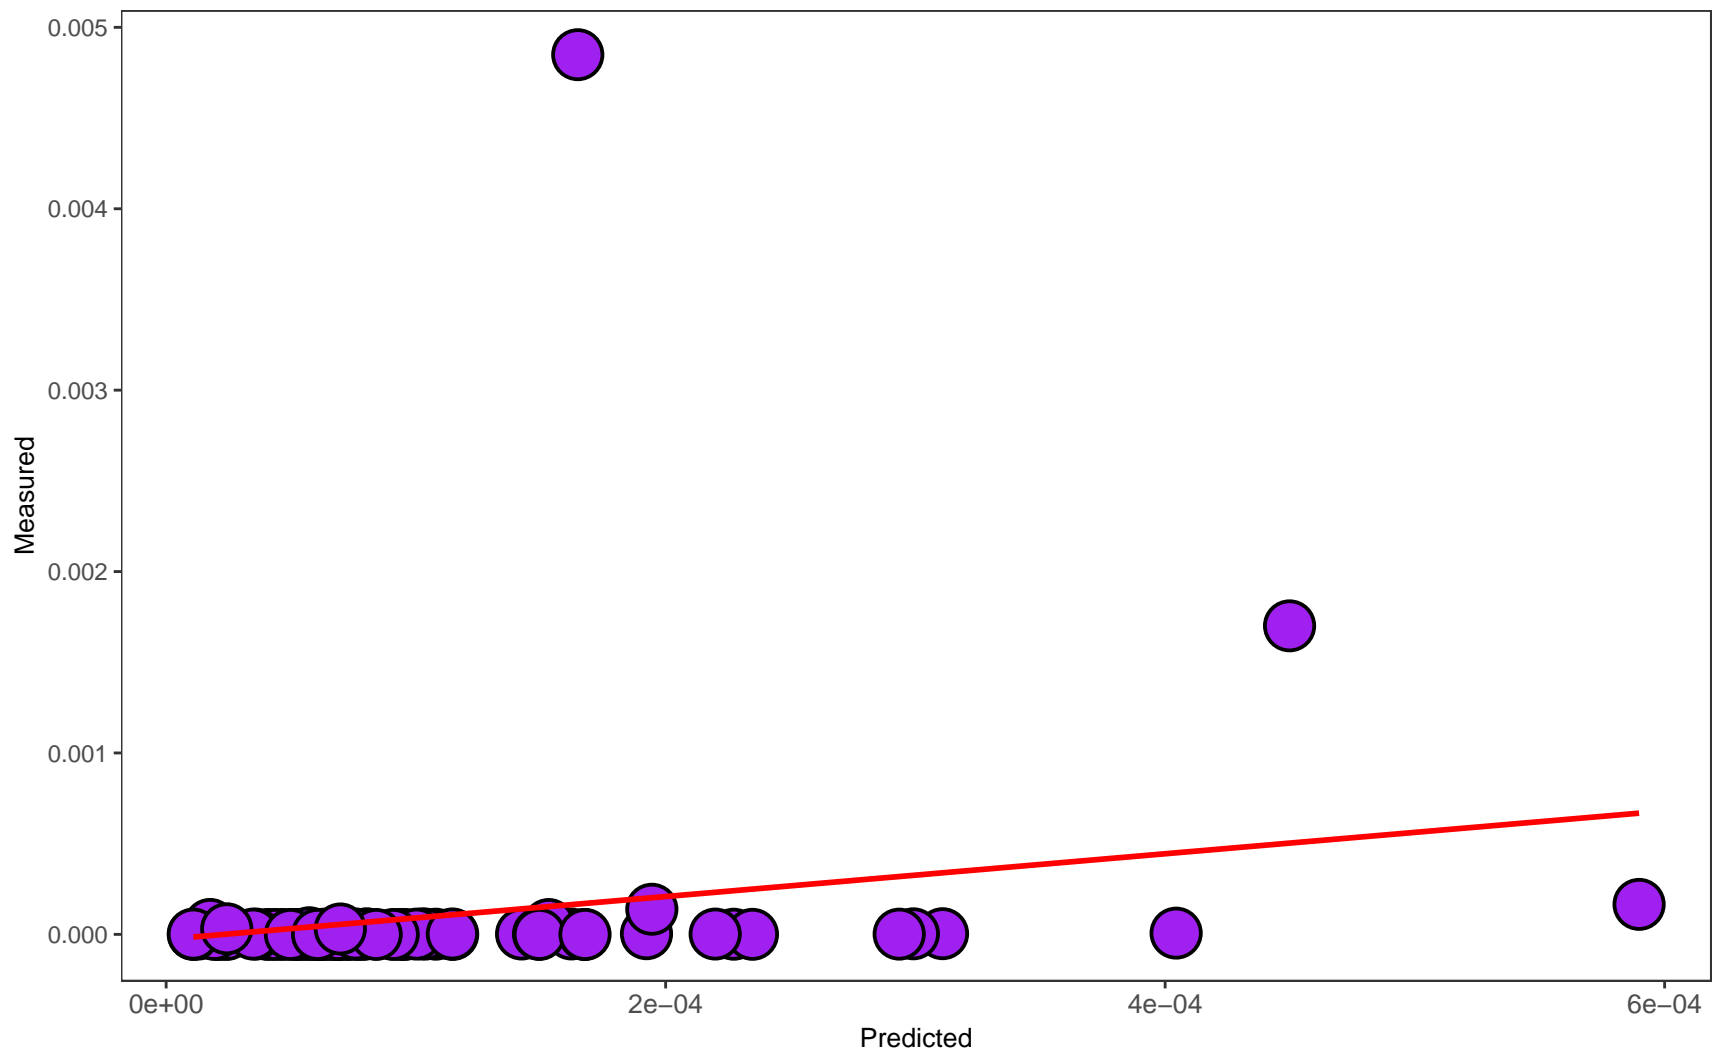



pantothenate (HILIC-pos\_Cluster\_0540): Spearman 0.5

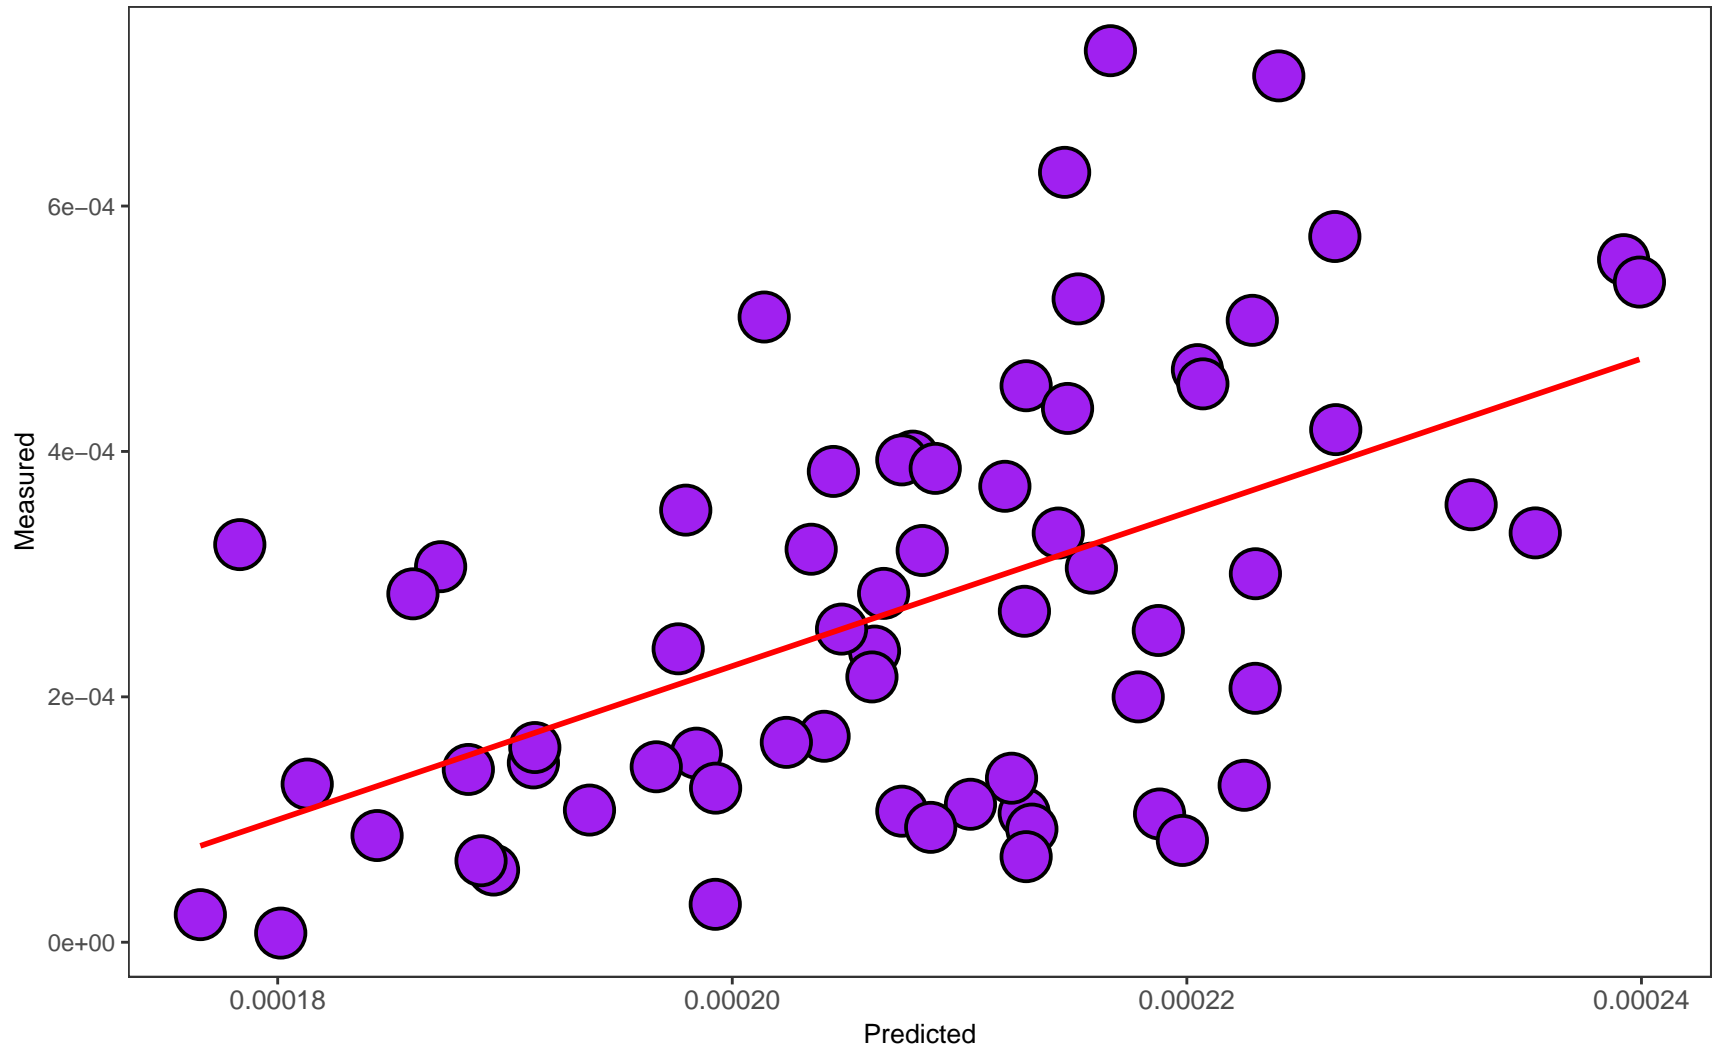

inosine (HILIC-pos\_Cluster\_0822): Spearman 0.36

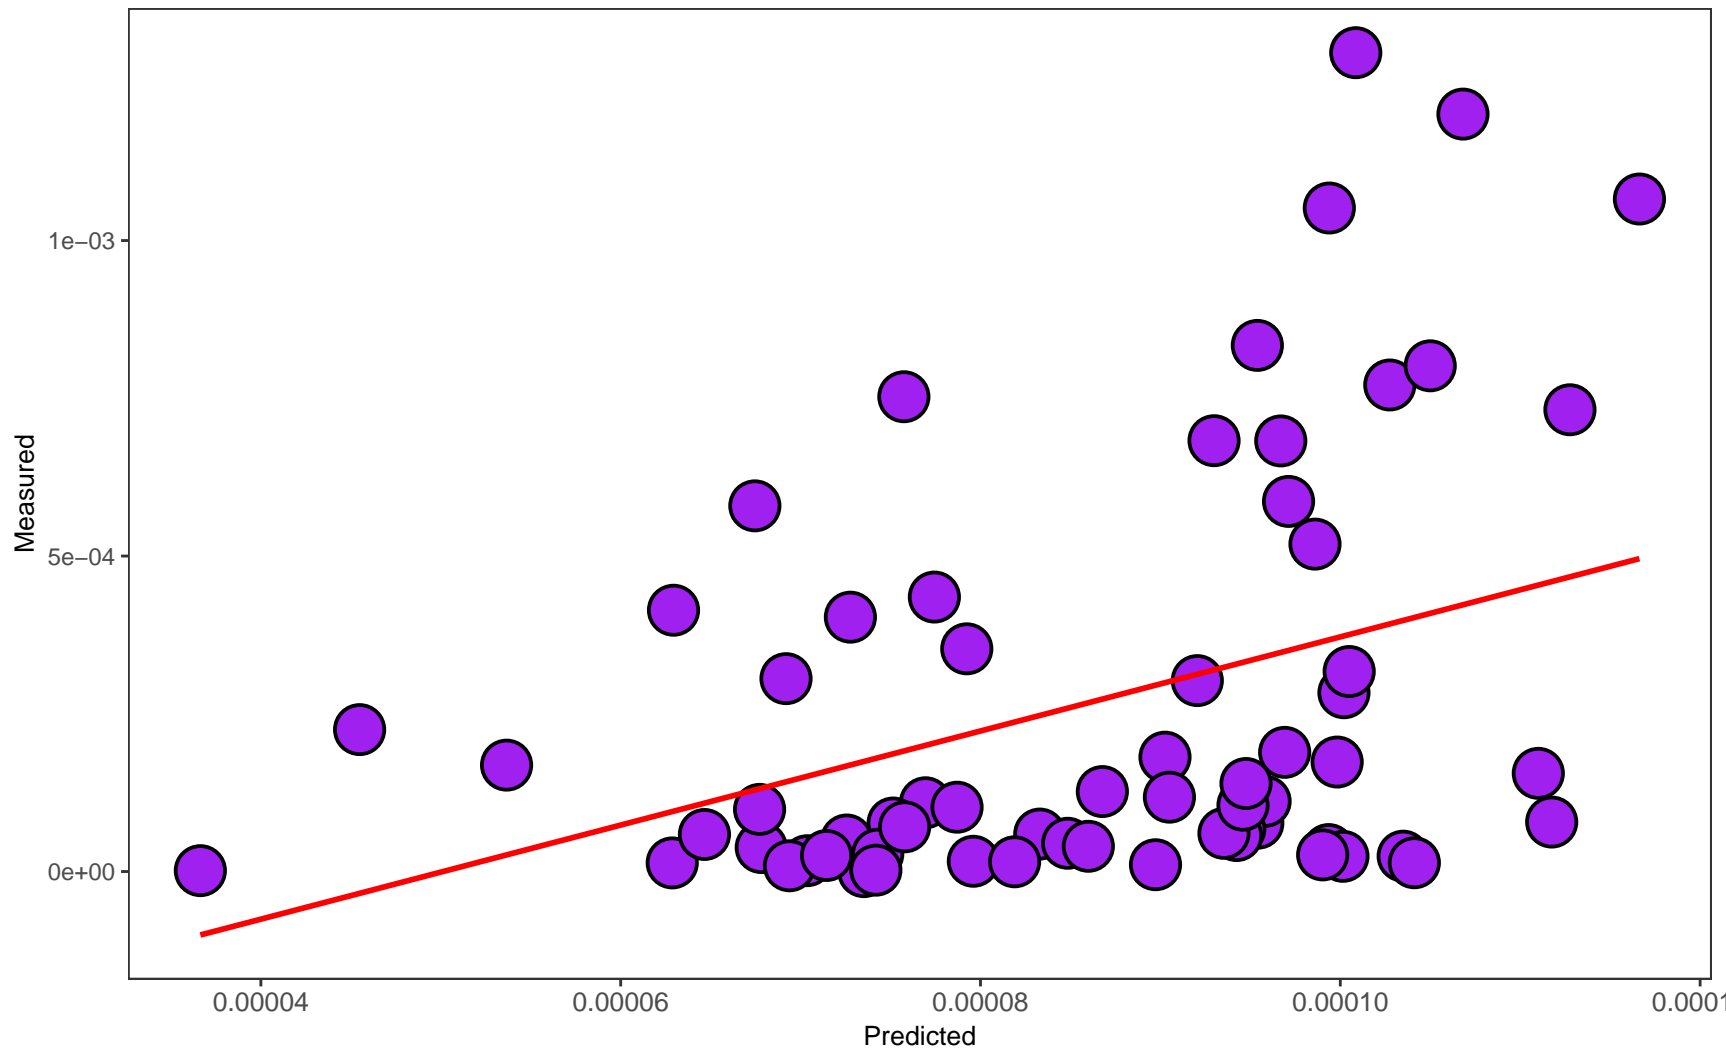

threosphingosine (HILIC-pos\_Cluster\_0906): Spearman 0.49

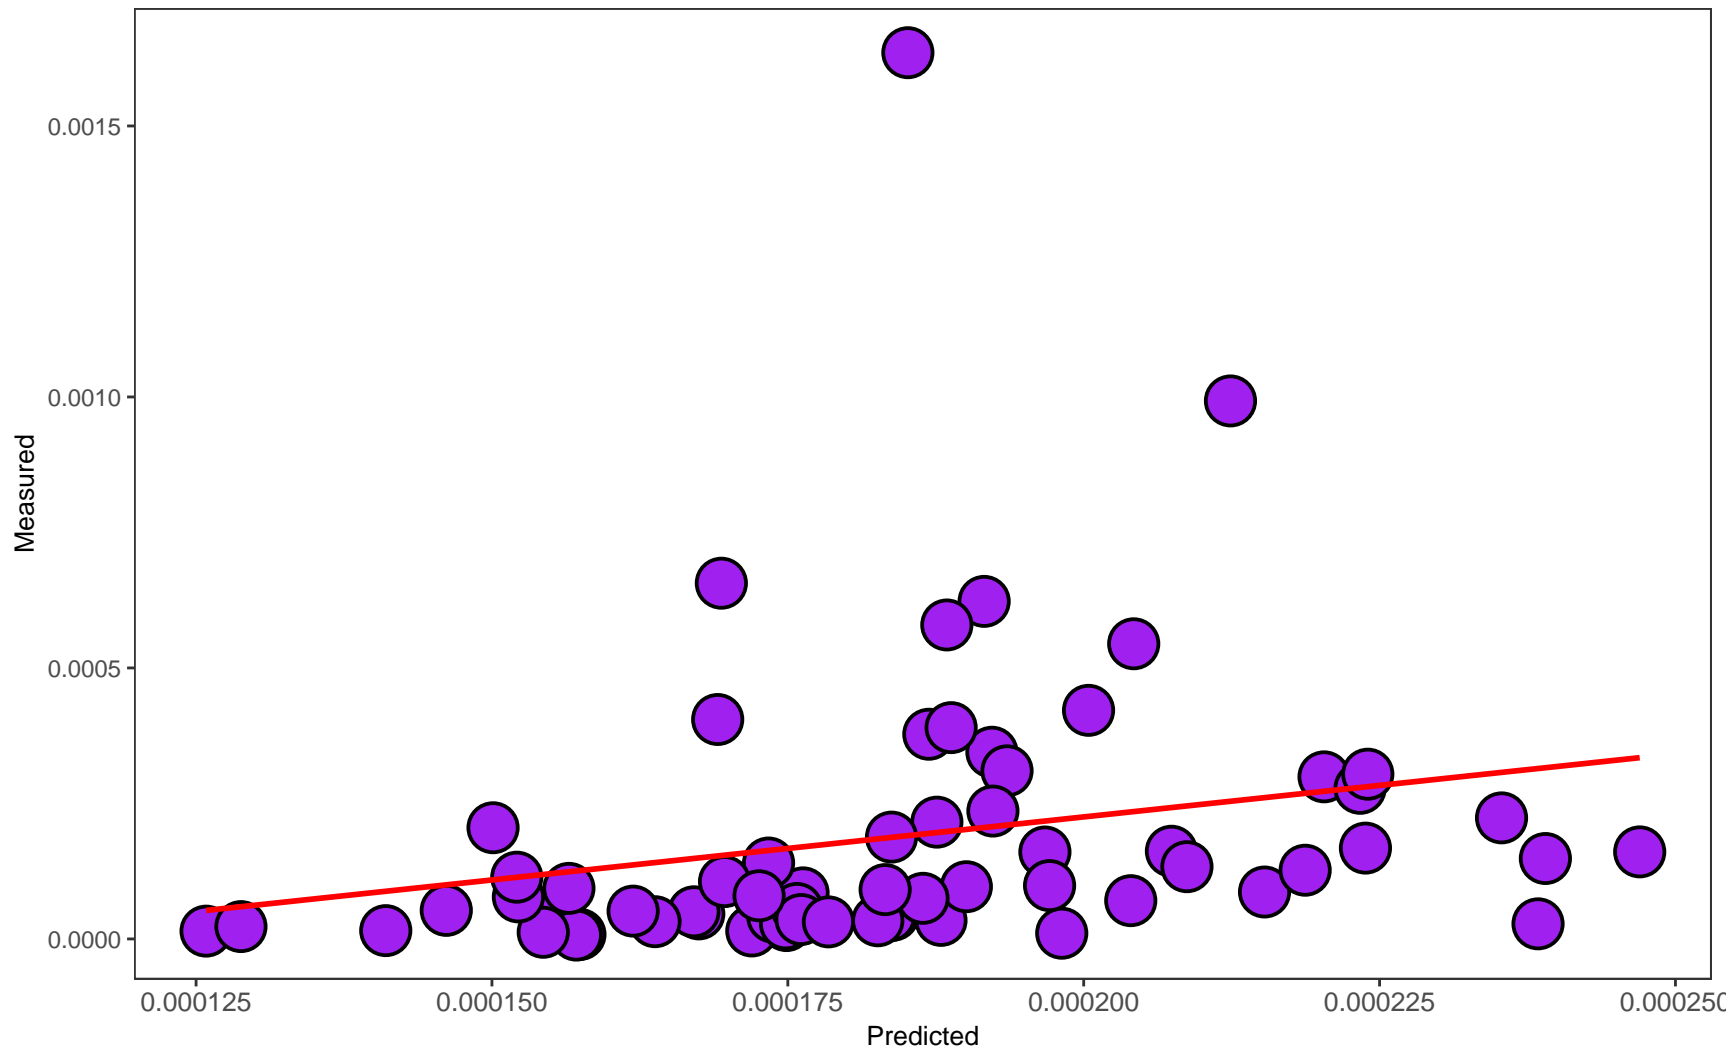

diacetylspermine (HILIC-pos\_Cluster\_0936): Spearman 0.54

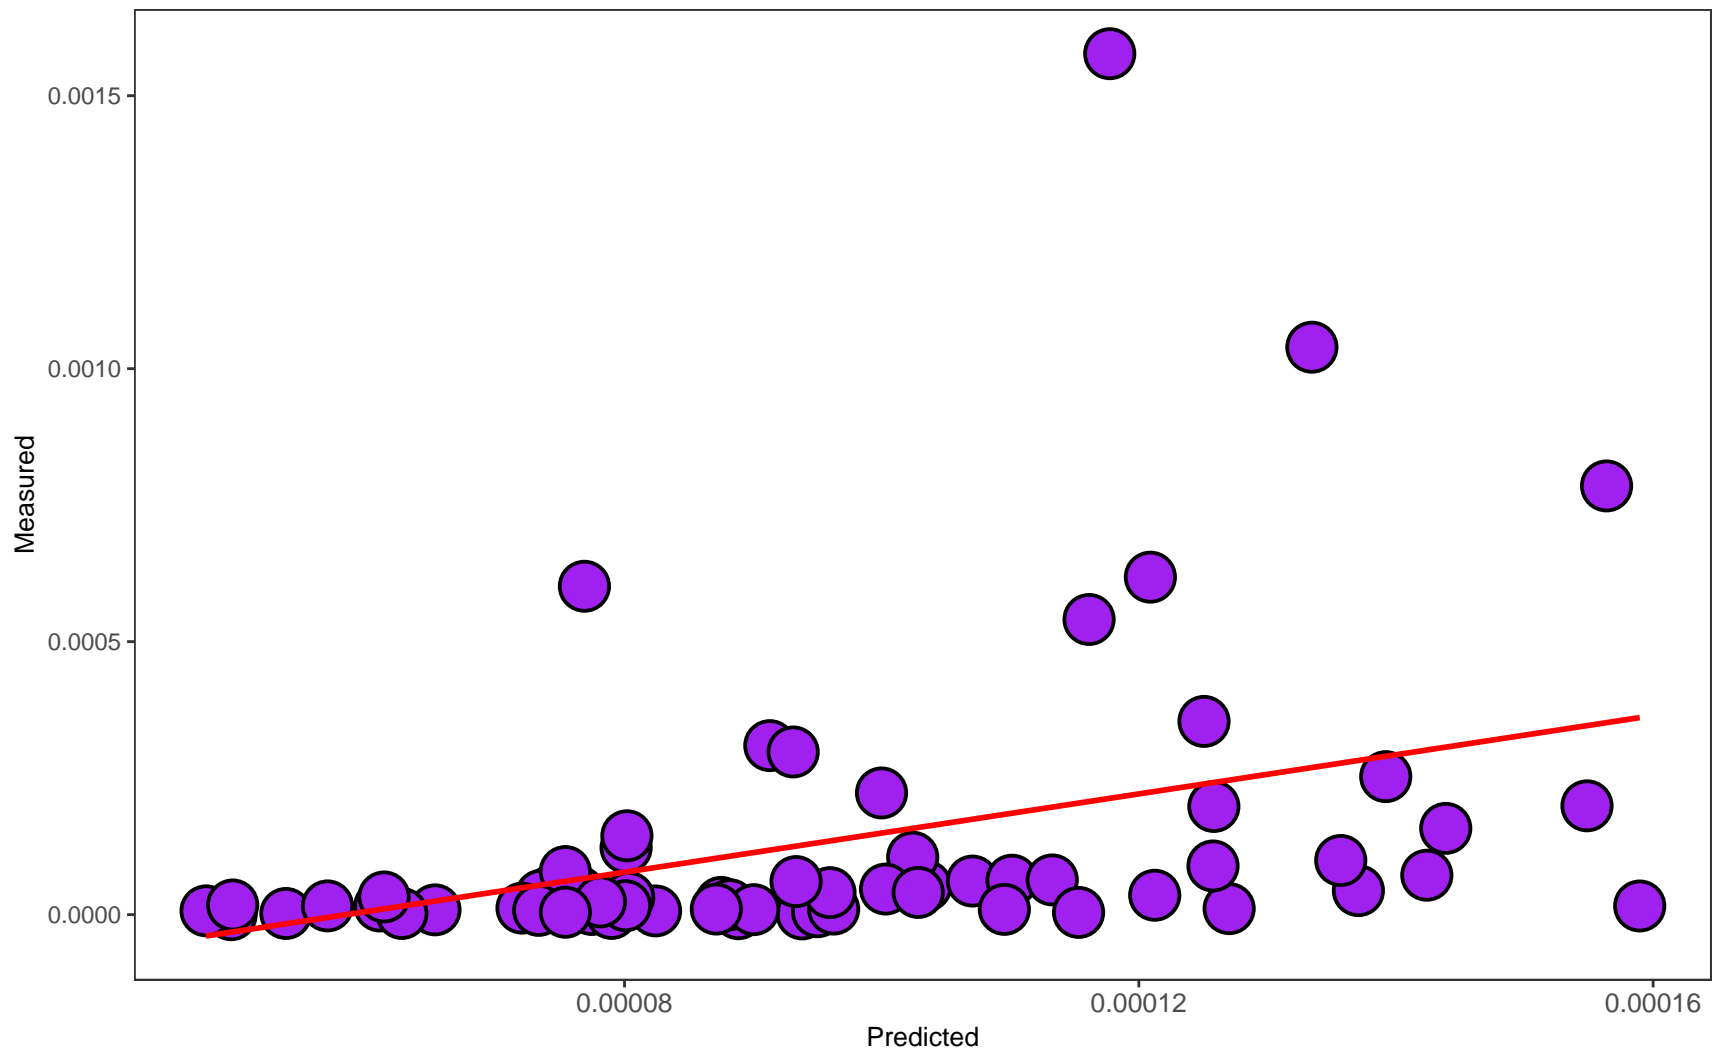

phytosphingosine (HILIC-pos\_Cluster\_1113): Spearman 0.52

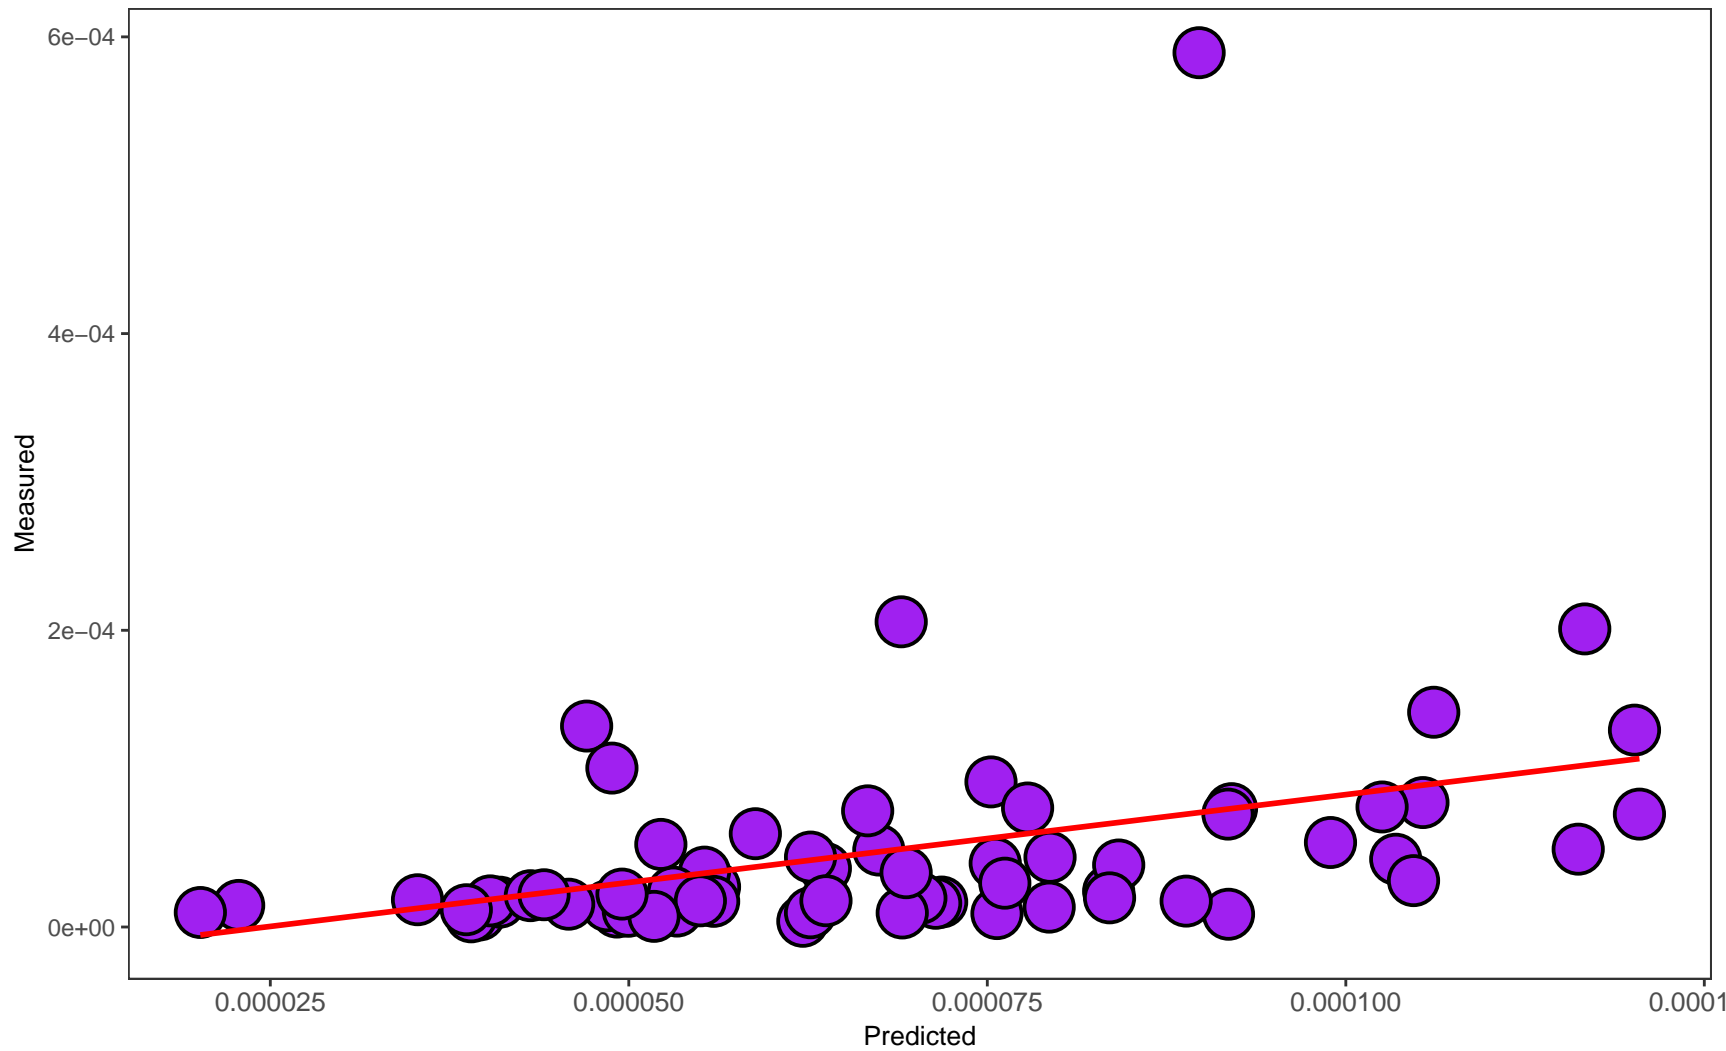

linoleoyl ethanolamide (HILIC-pos\_Cluster\_1148): Spearman 0.4

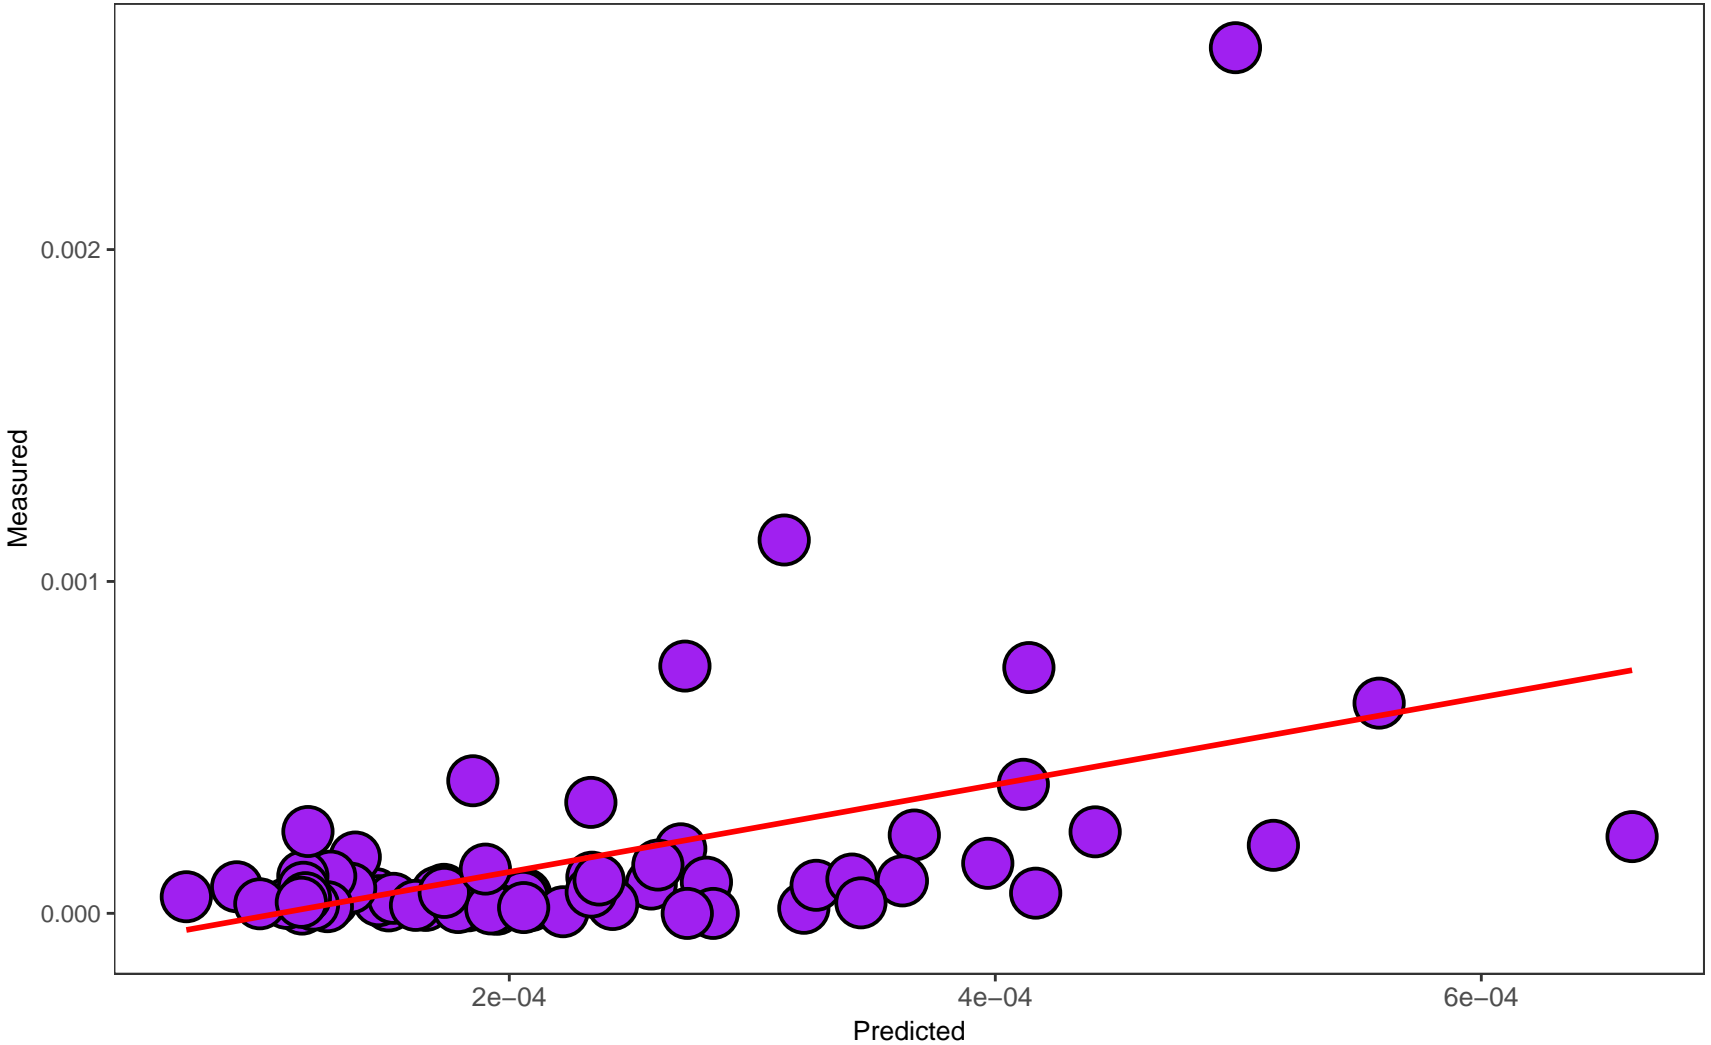

linoleoyl ethanolamide (HILIC-pos\_Cluster\_1160): Spearman 0.34

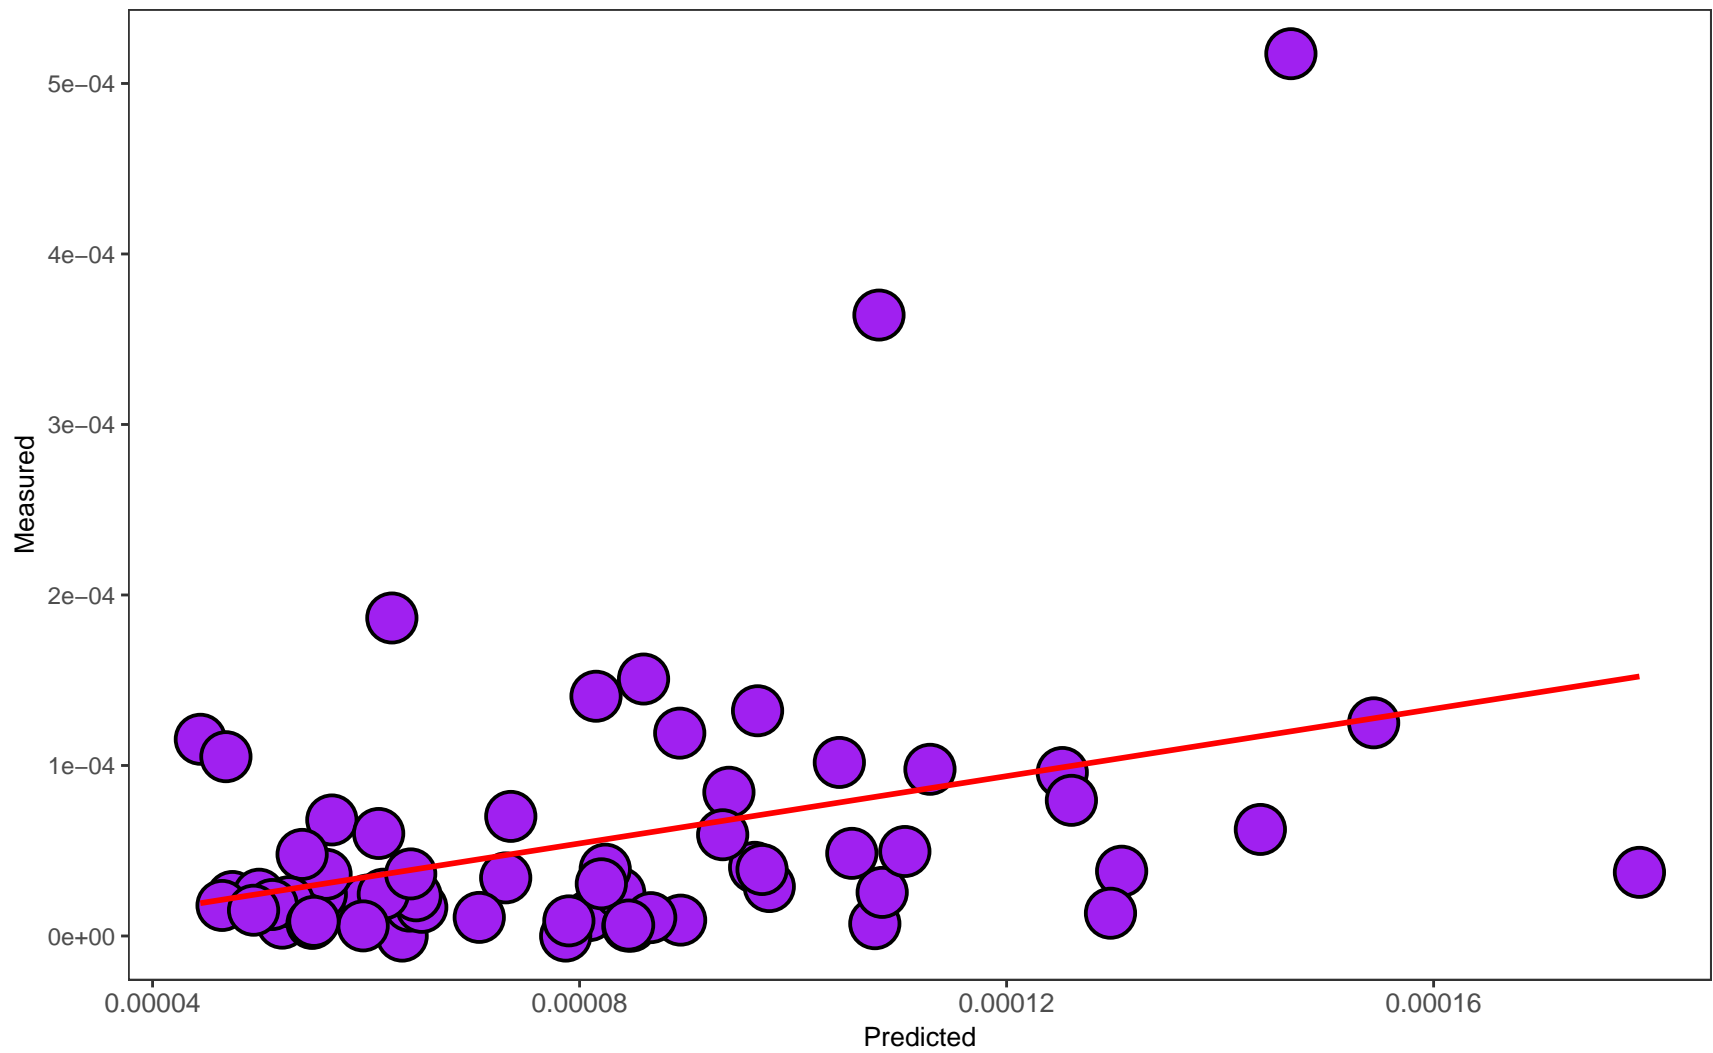

C16 carnitine (HILIC-pos\_Cluster\_1486): Spearman 0.59

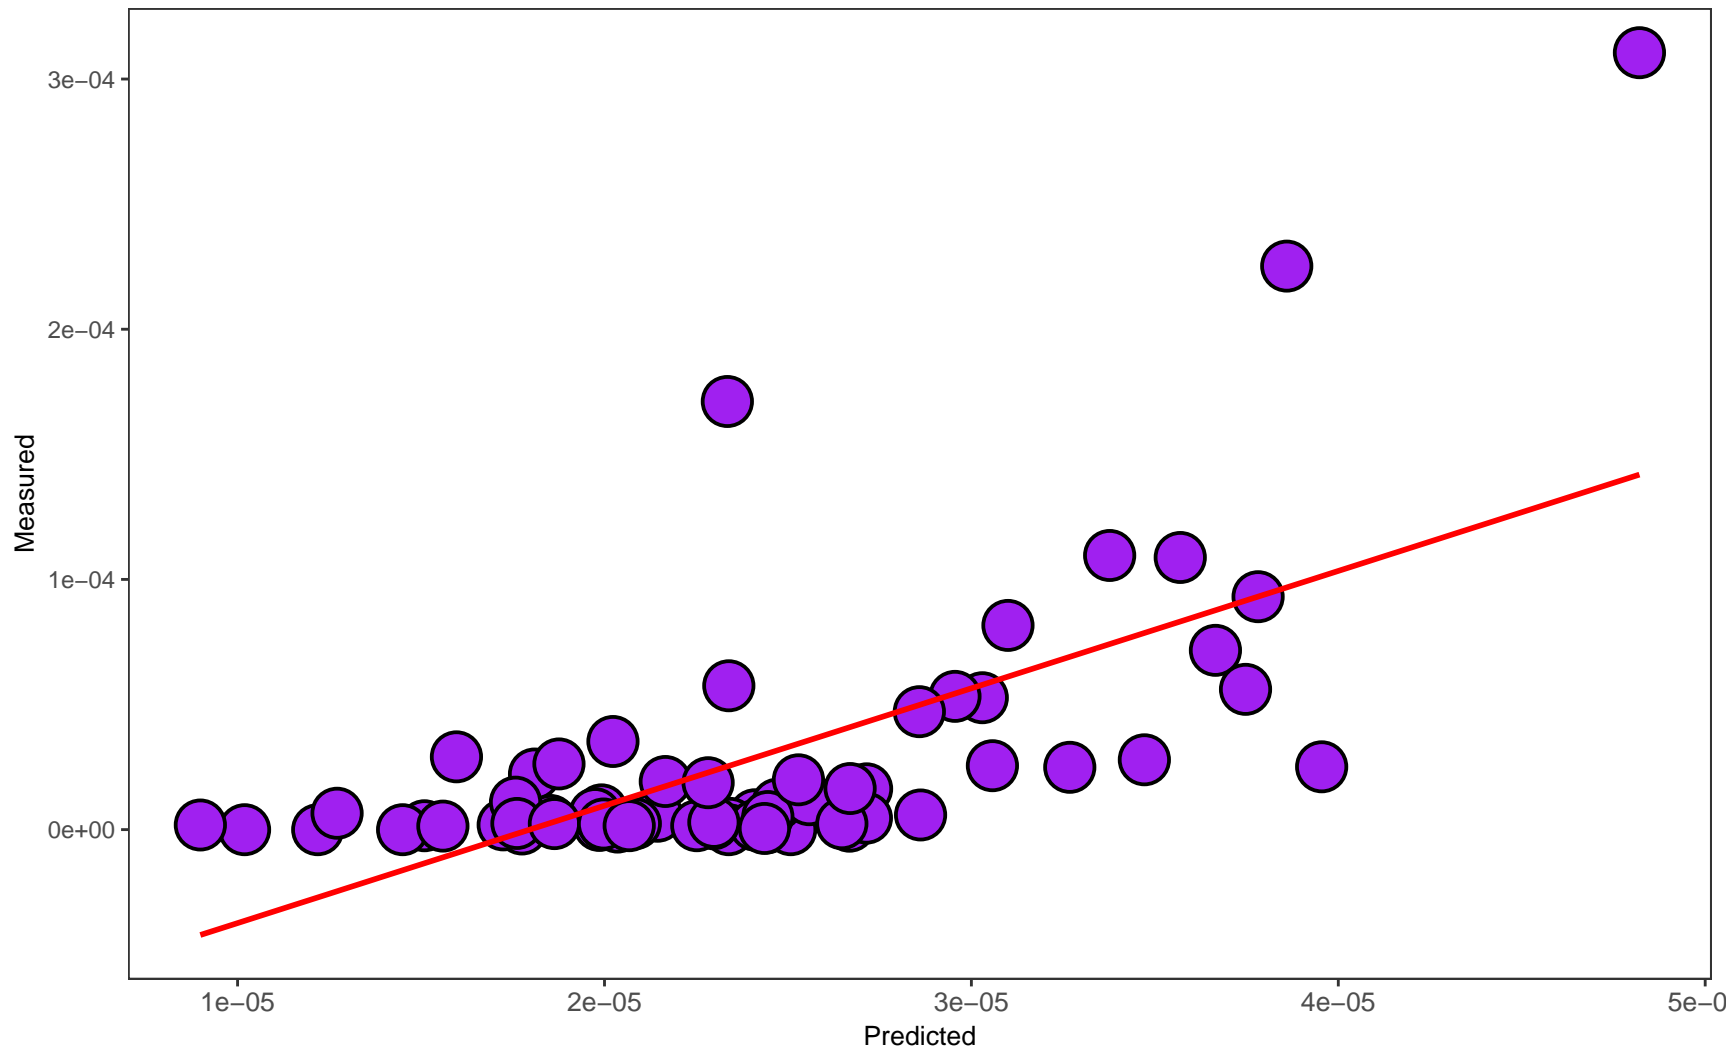



C20:4 carnitine (HILIC-pos\_Cluster\_1673): Spearman 0.51

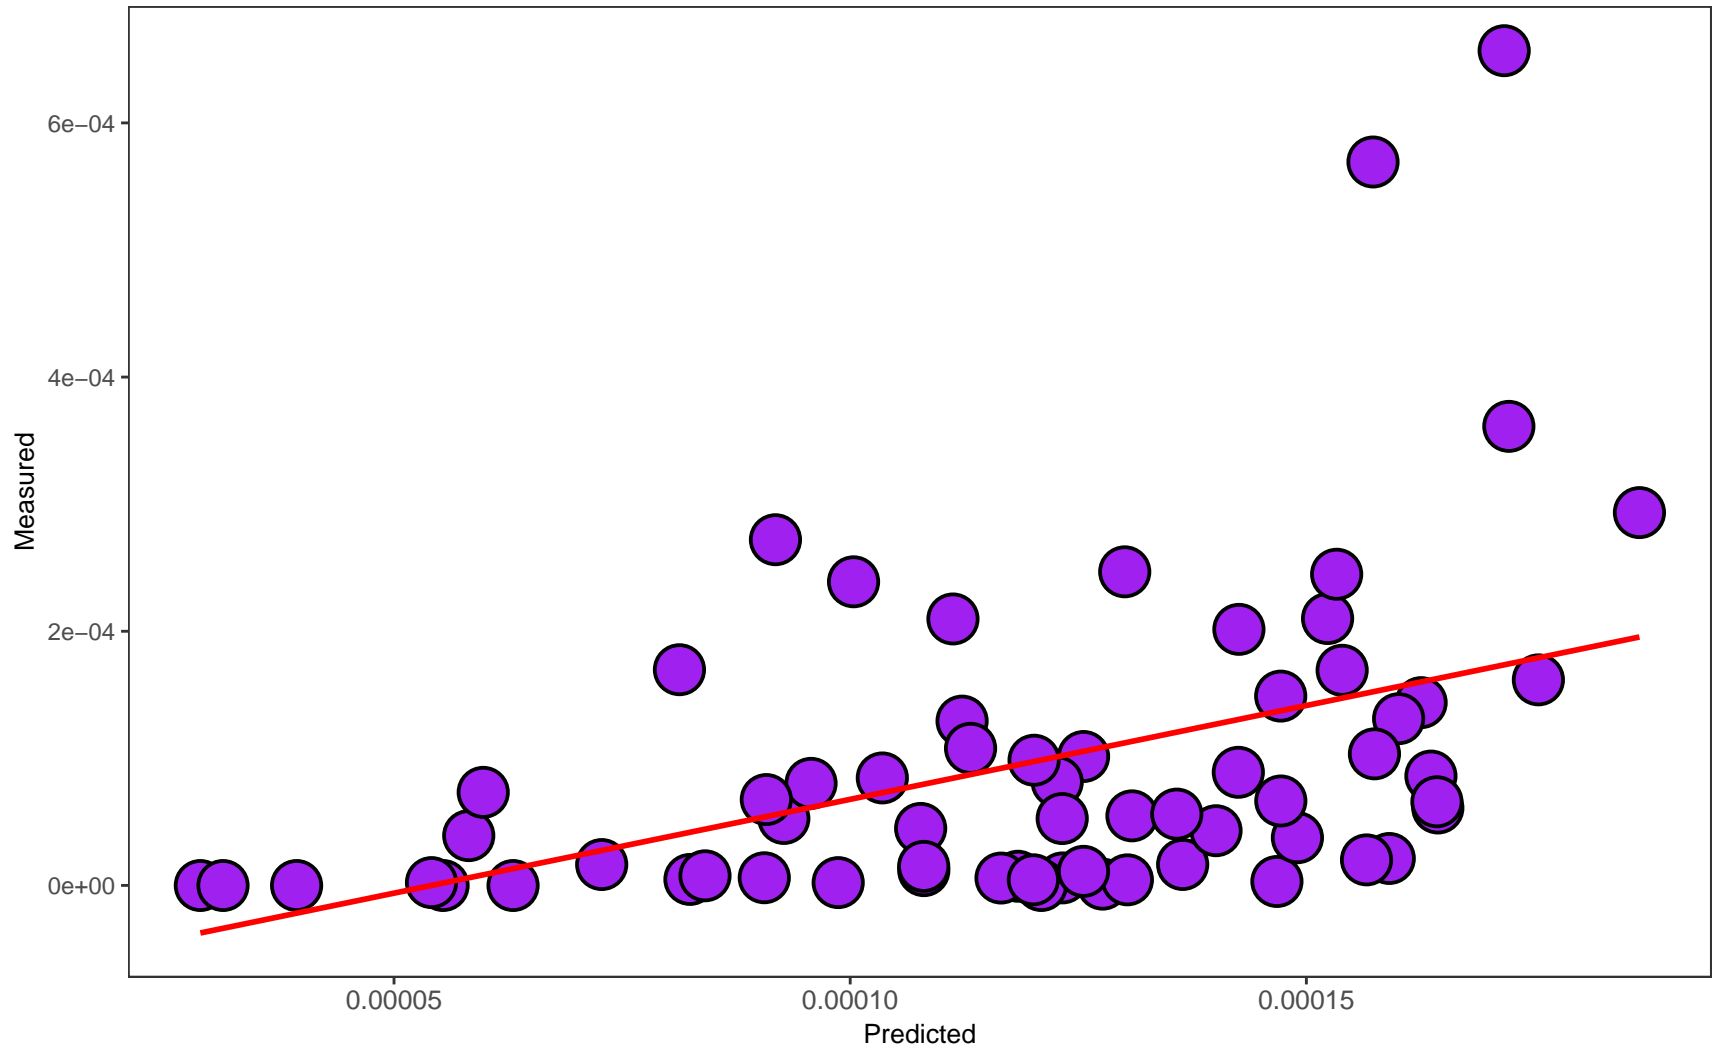

bilirubin (HILIC-pos\_Cluster\_2052): Spearman 0.31

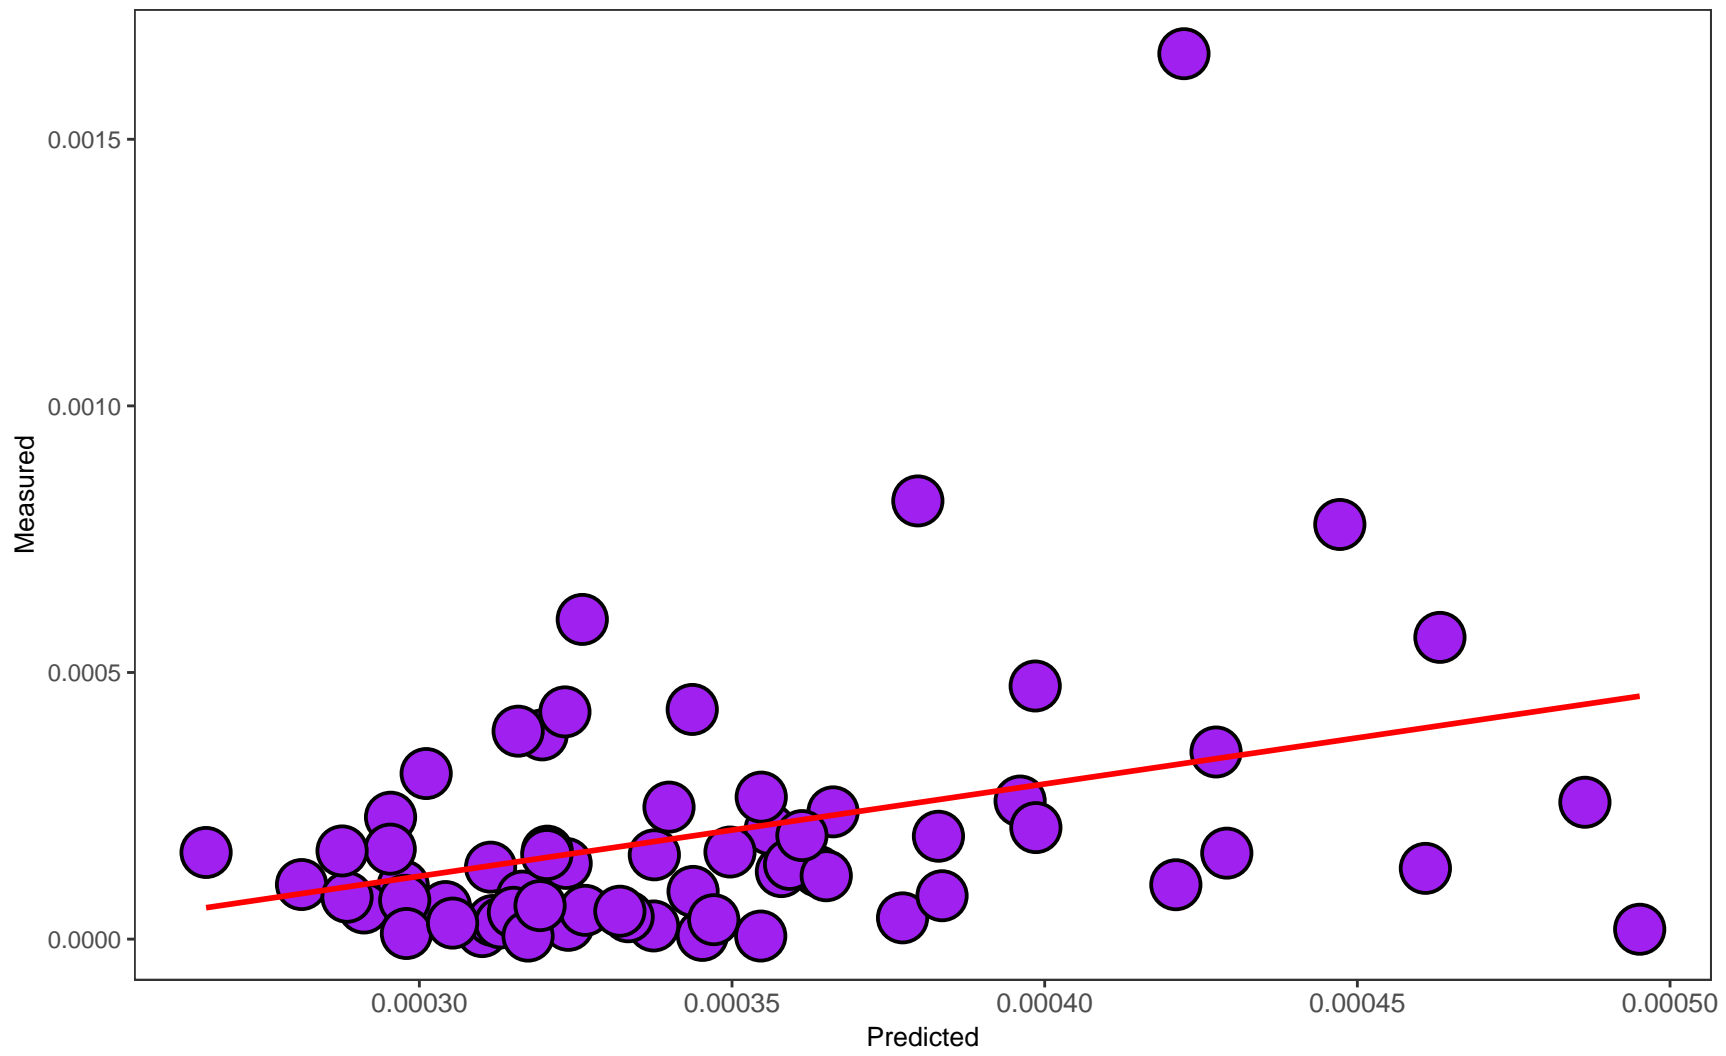

urobilin\* (HILIC-pos\_Cluster\_2093): Spearman 0.77

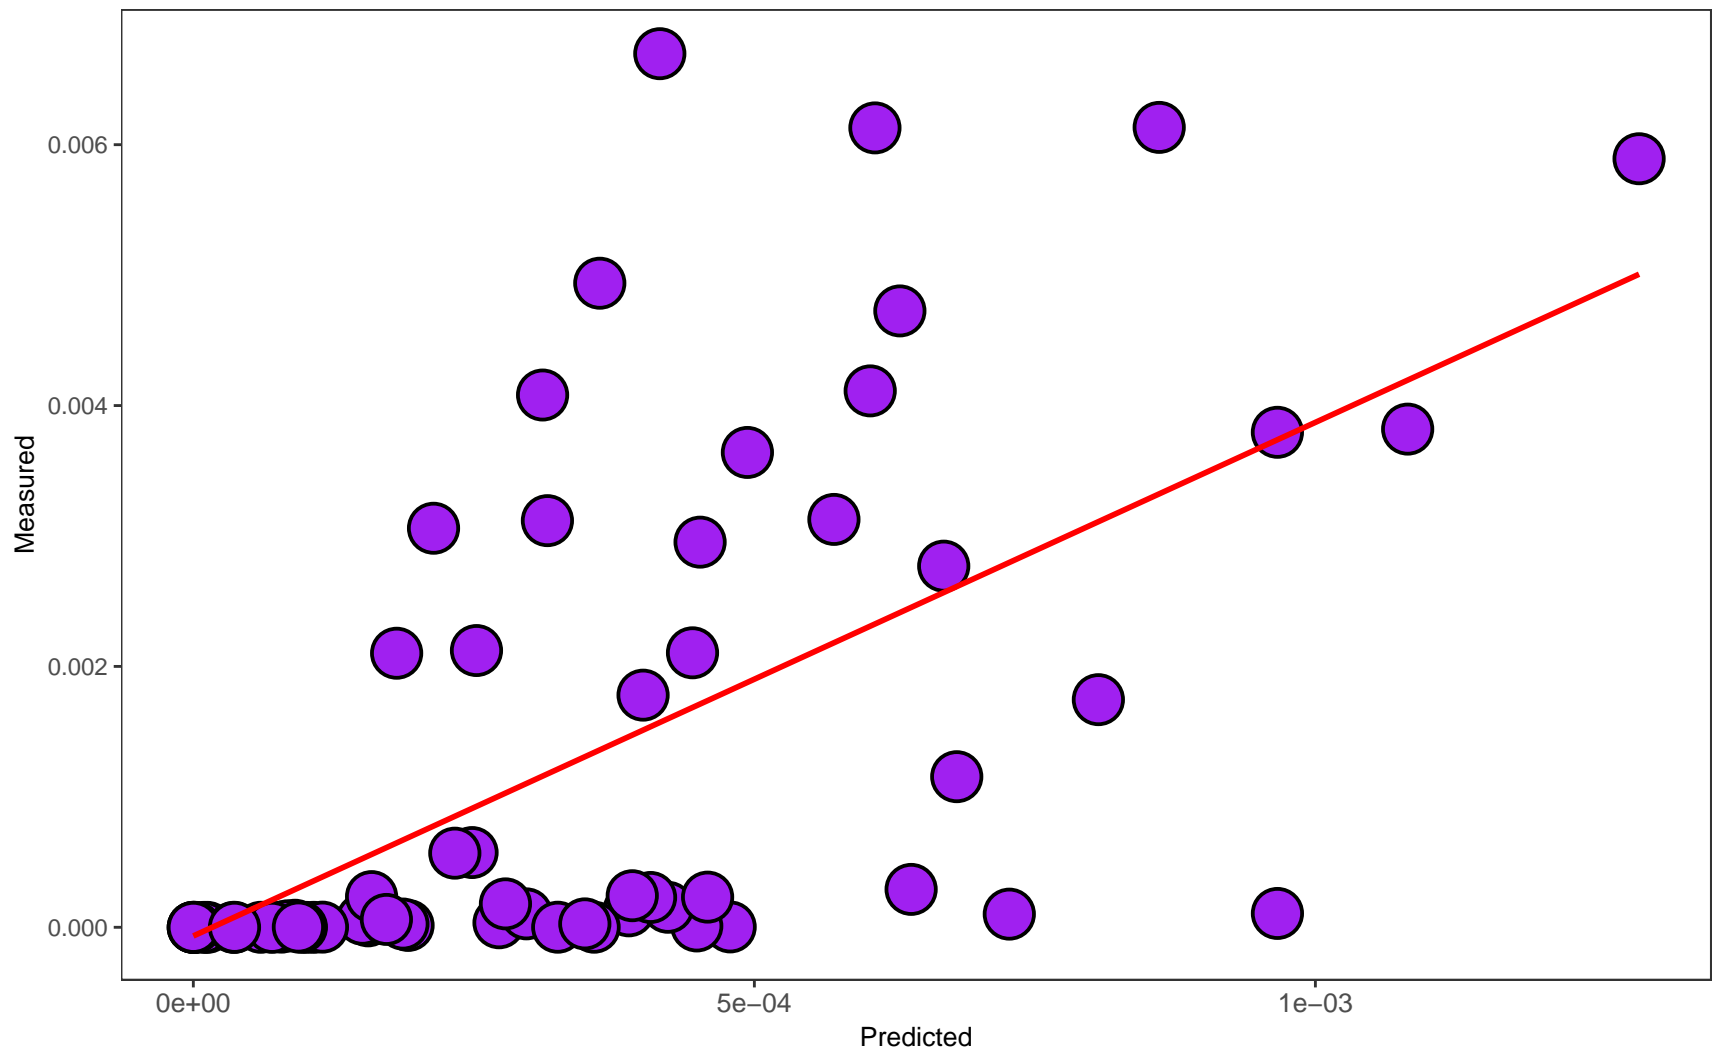

Supplement: 41467_2019_10927_MOESM8_ESM.pdf [file 41467_2019_10927_MOESM8_ESM.pdf]
