# Supplementary material for: Predictive metabolomic profiling of microbial communities using amplicon or metagenomic sequences
Source: PubMed Central journal article supplement (PMC6637180; doi:10.1038/s41467-019-10927-1), 2019-07-17

LLDeep\_0001\_HC: Spearman 0.68

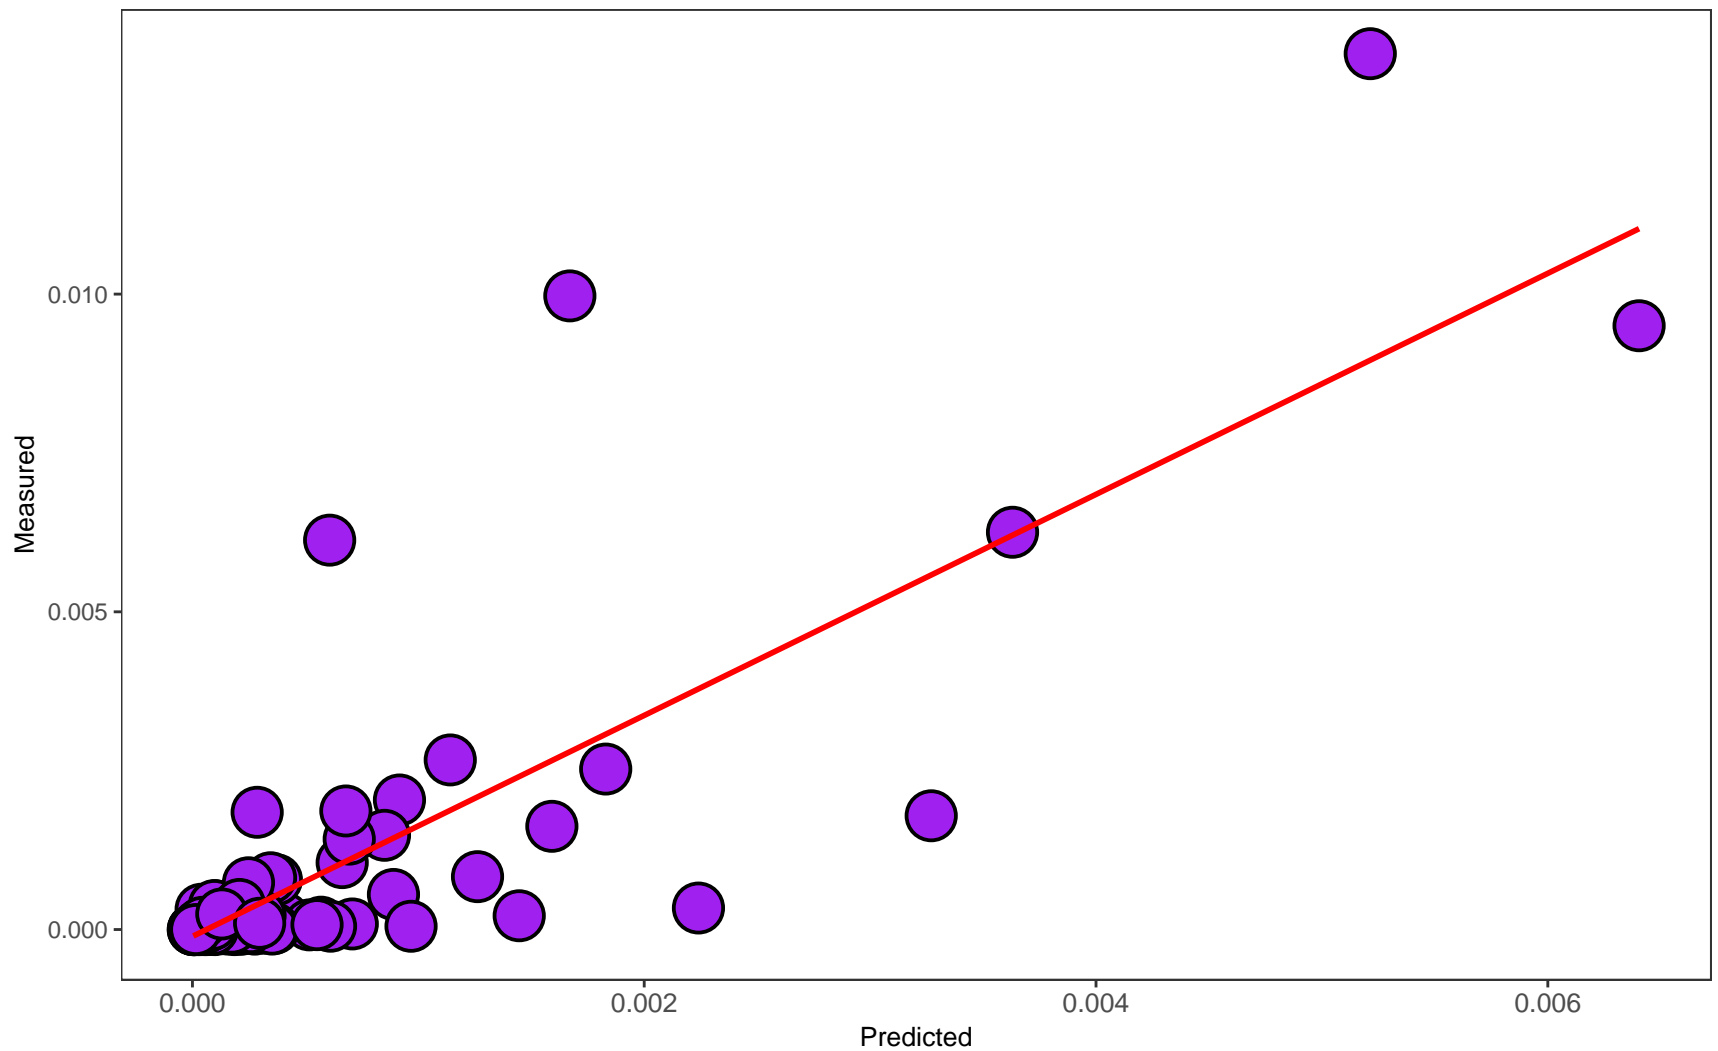

LLDeep\_0003\_HC: Spearman 0.69

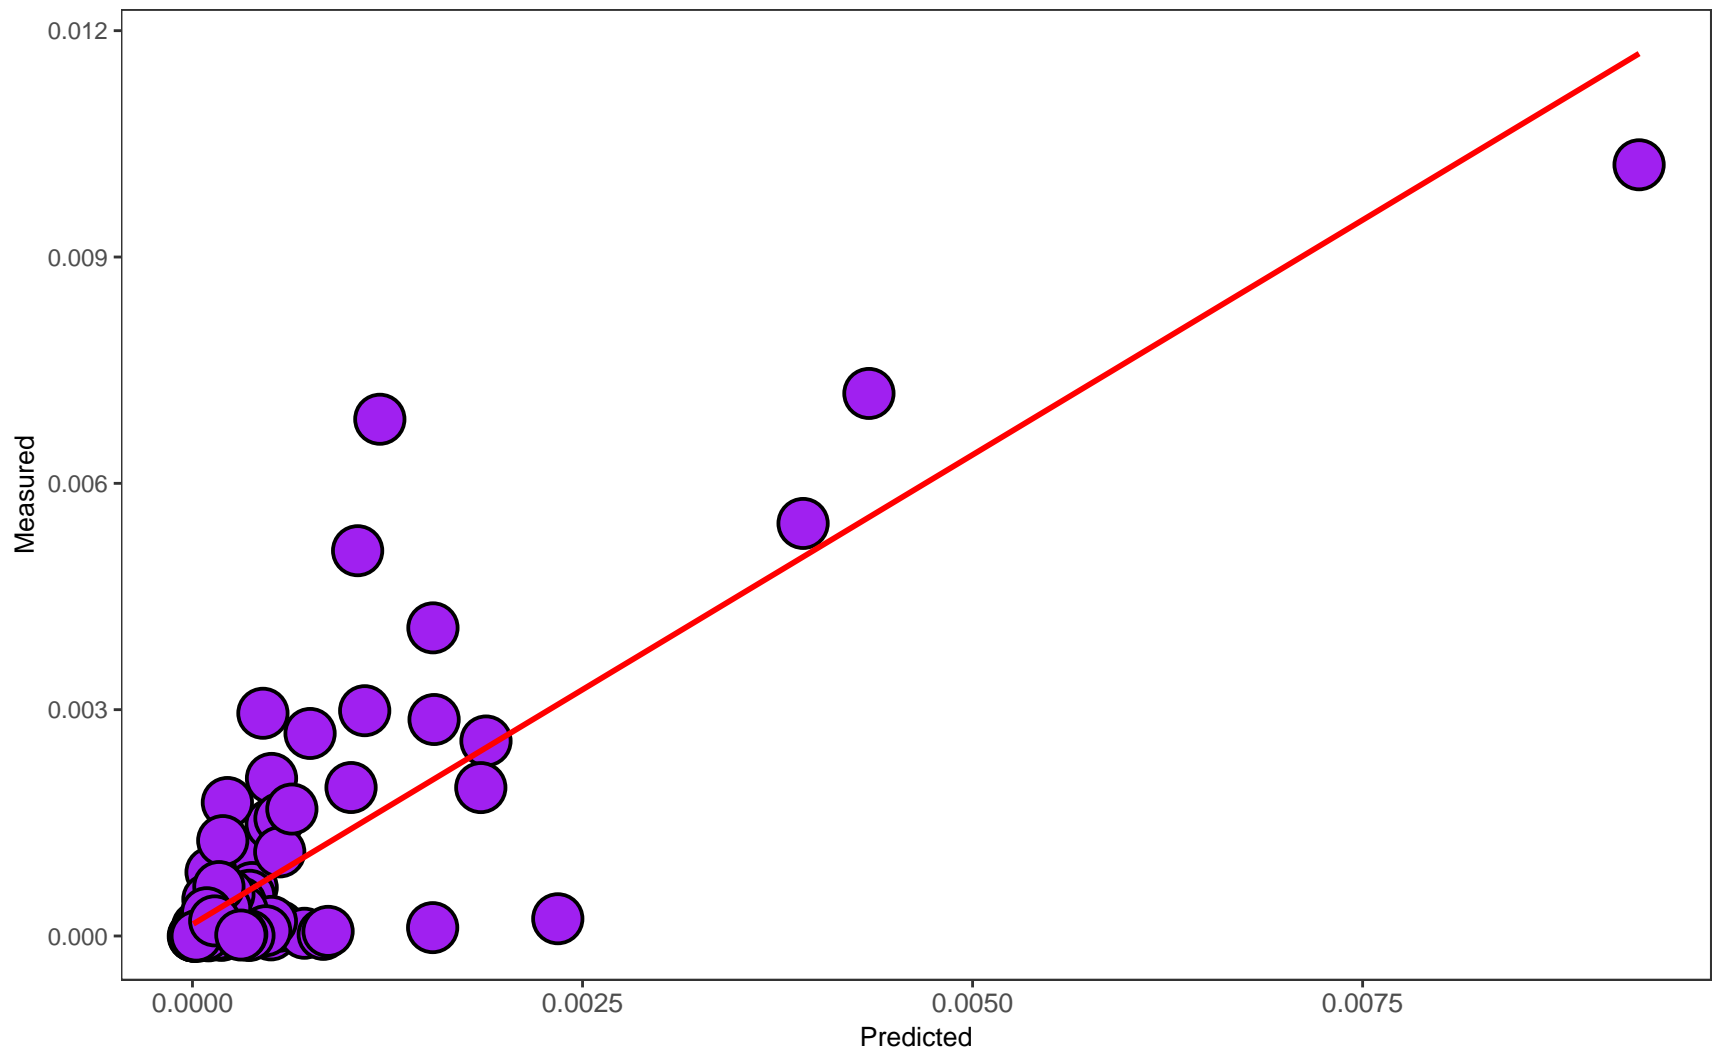

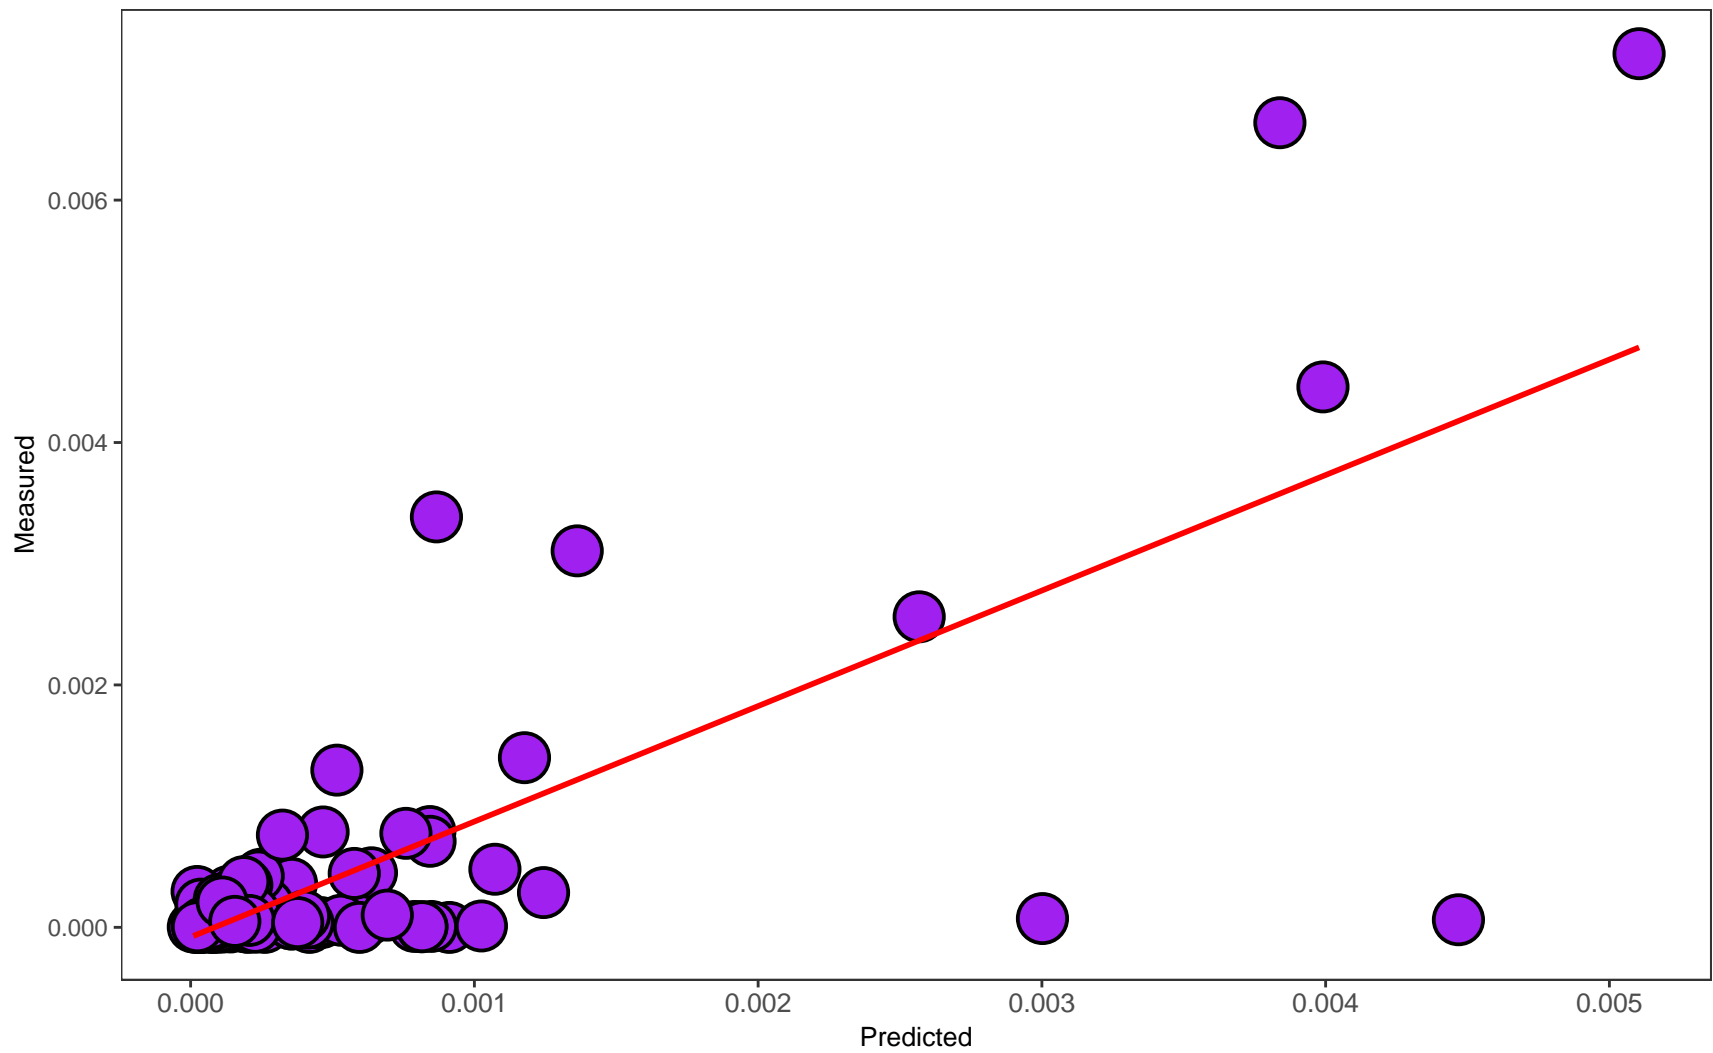

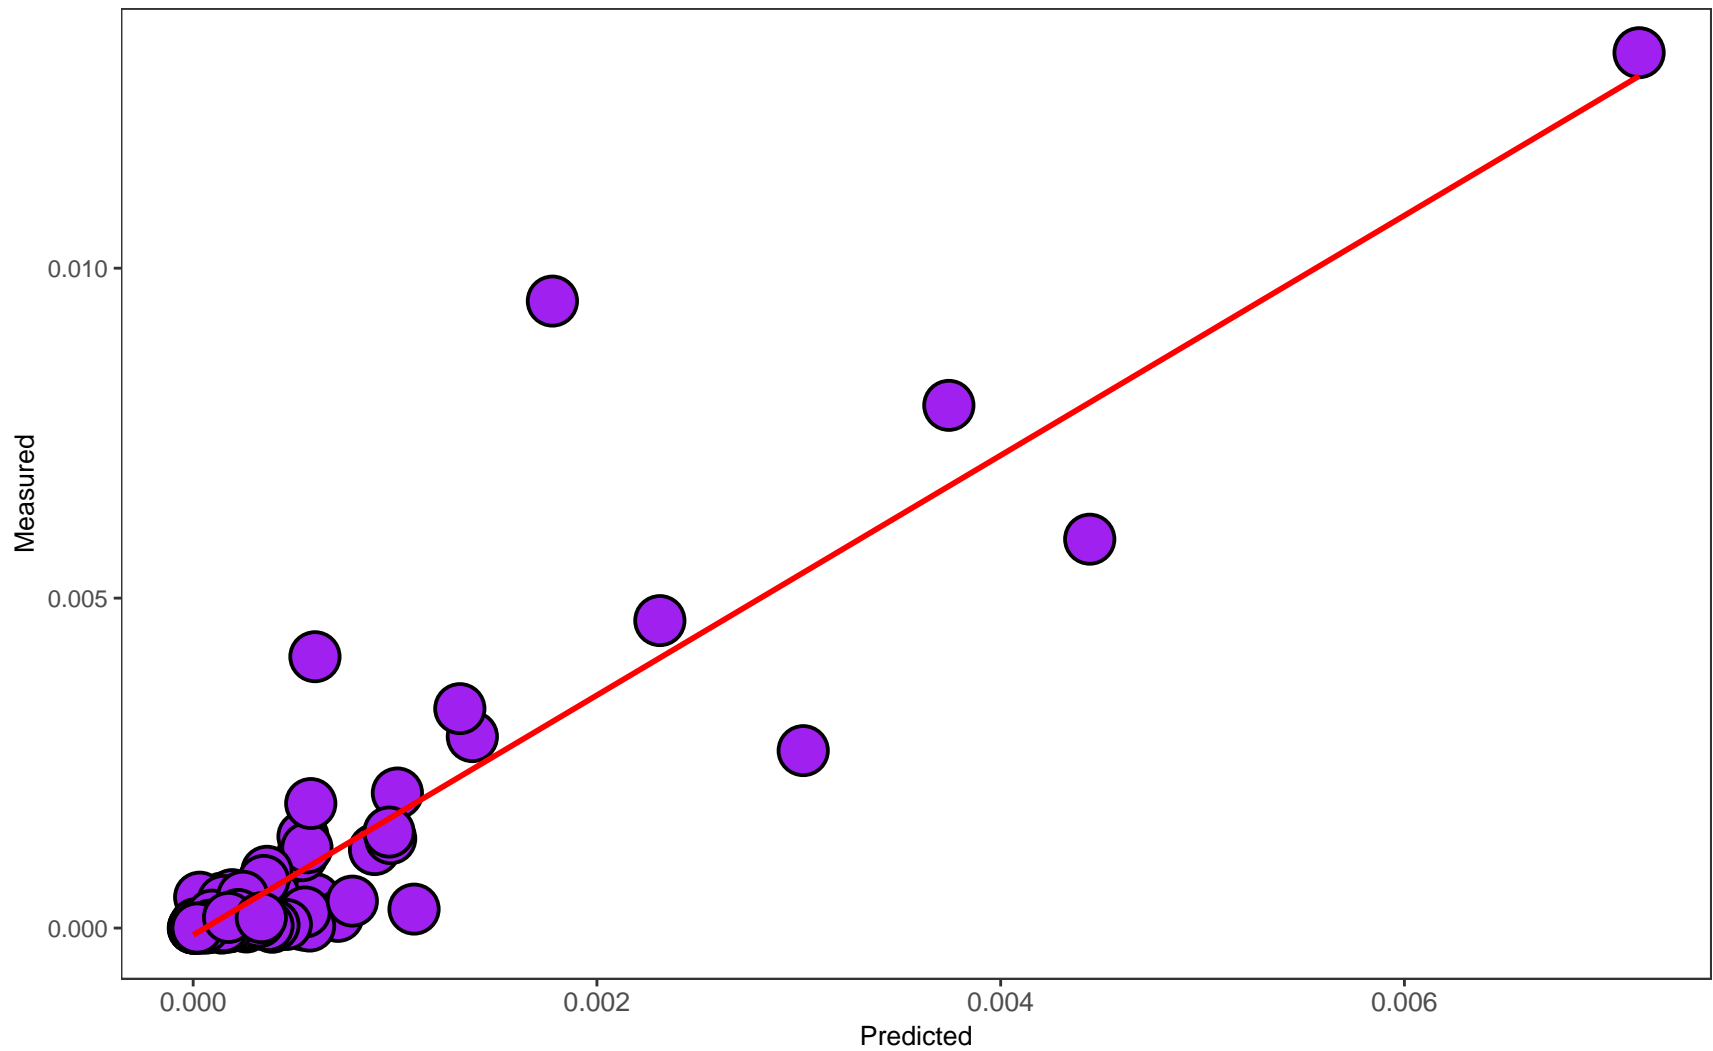

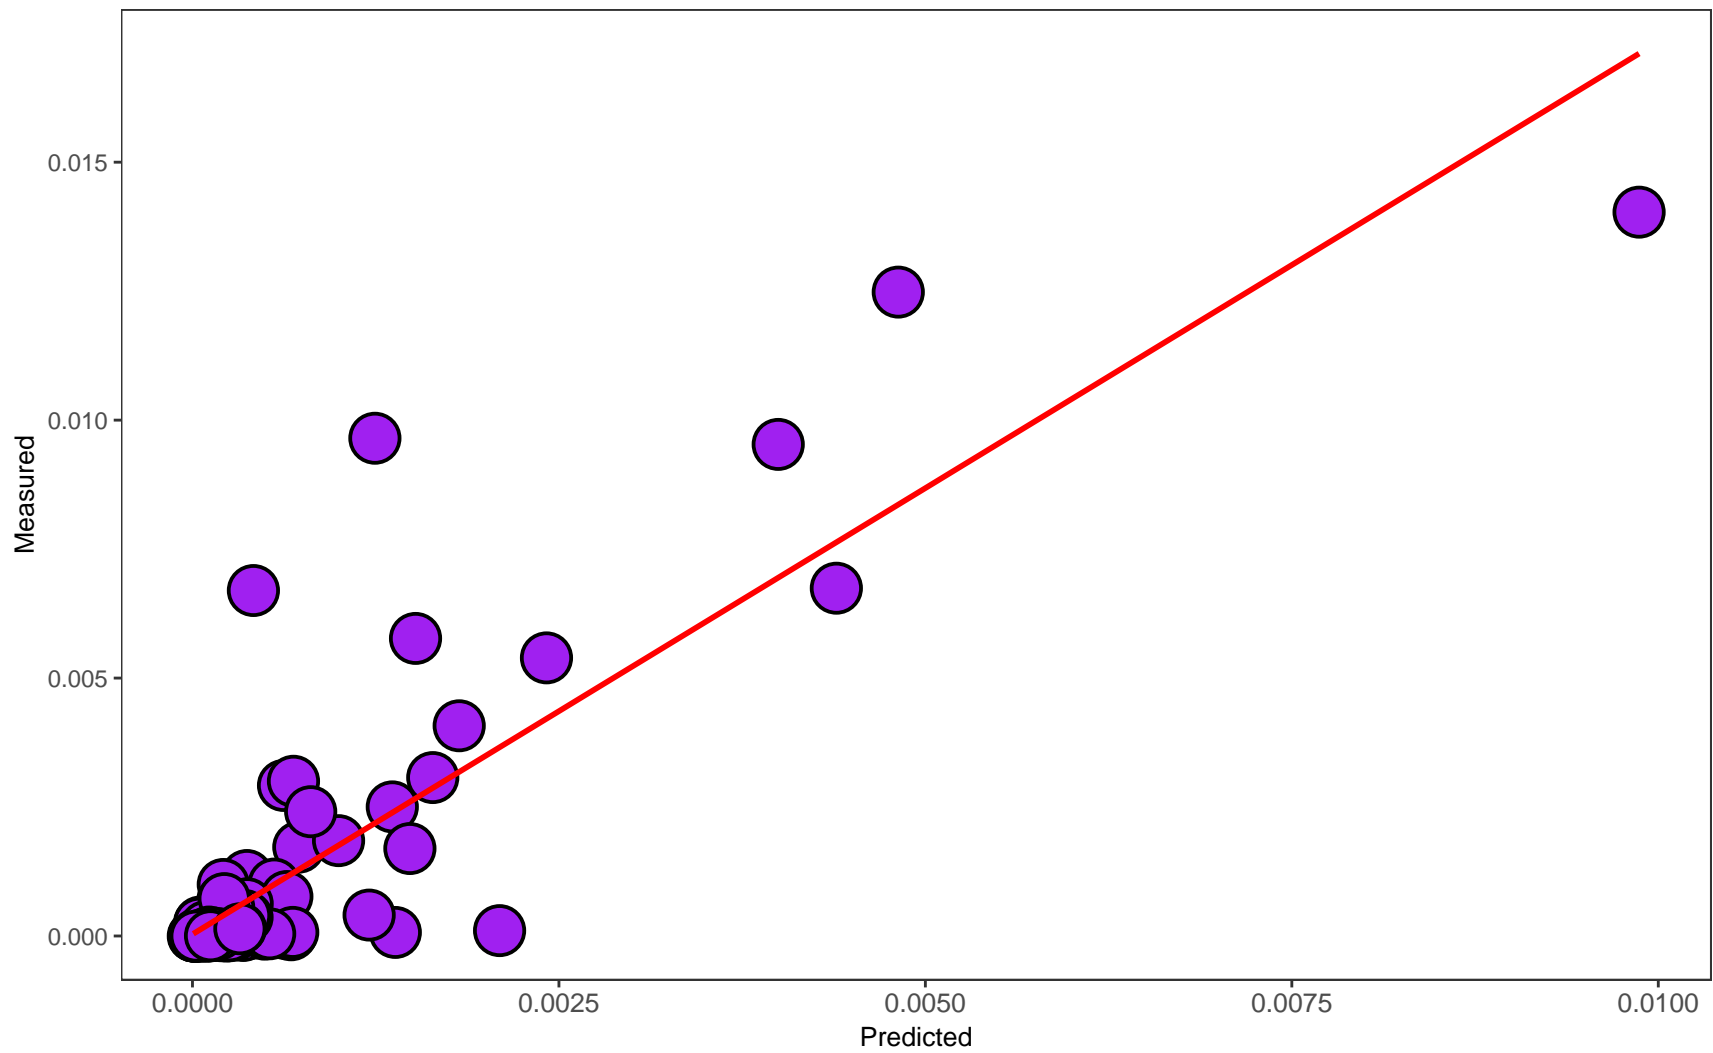

LLDeep\_0015\_HC: Spearman 0.84

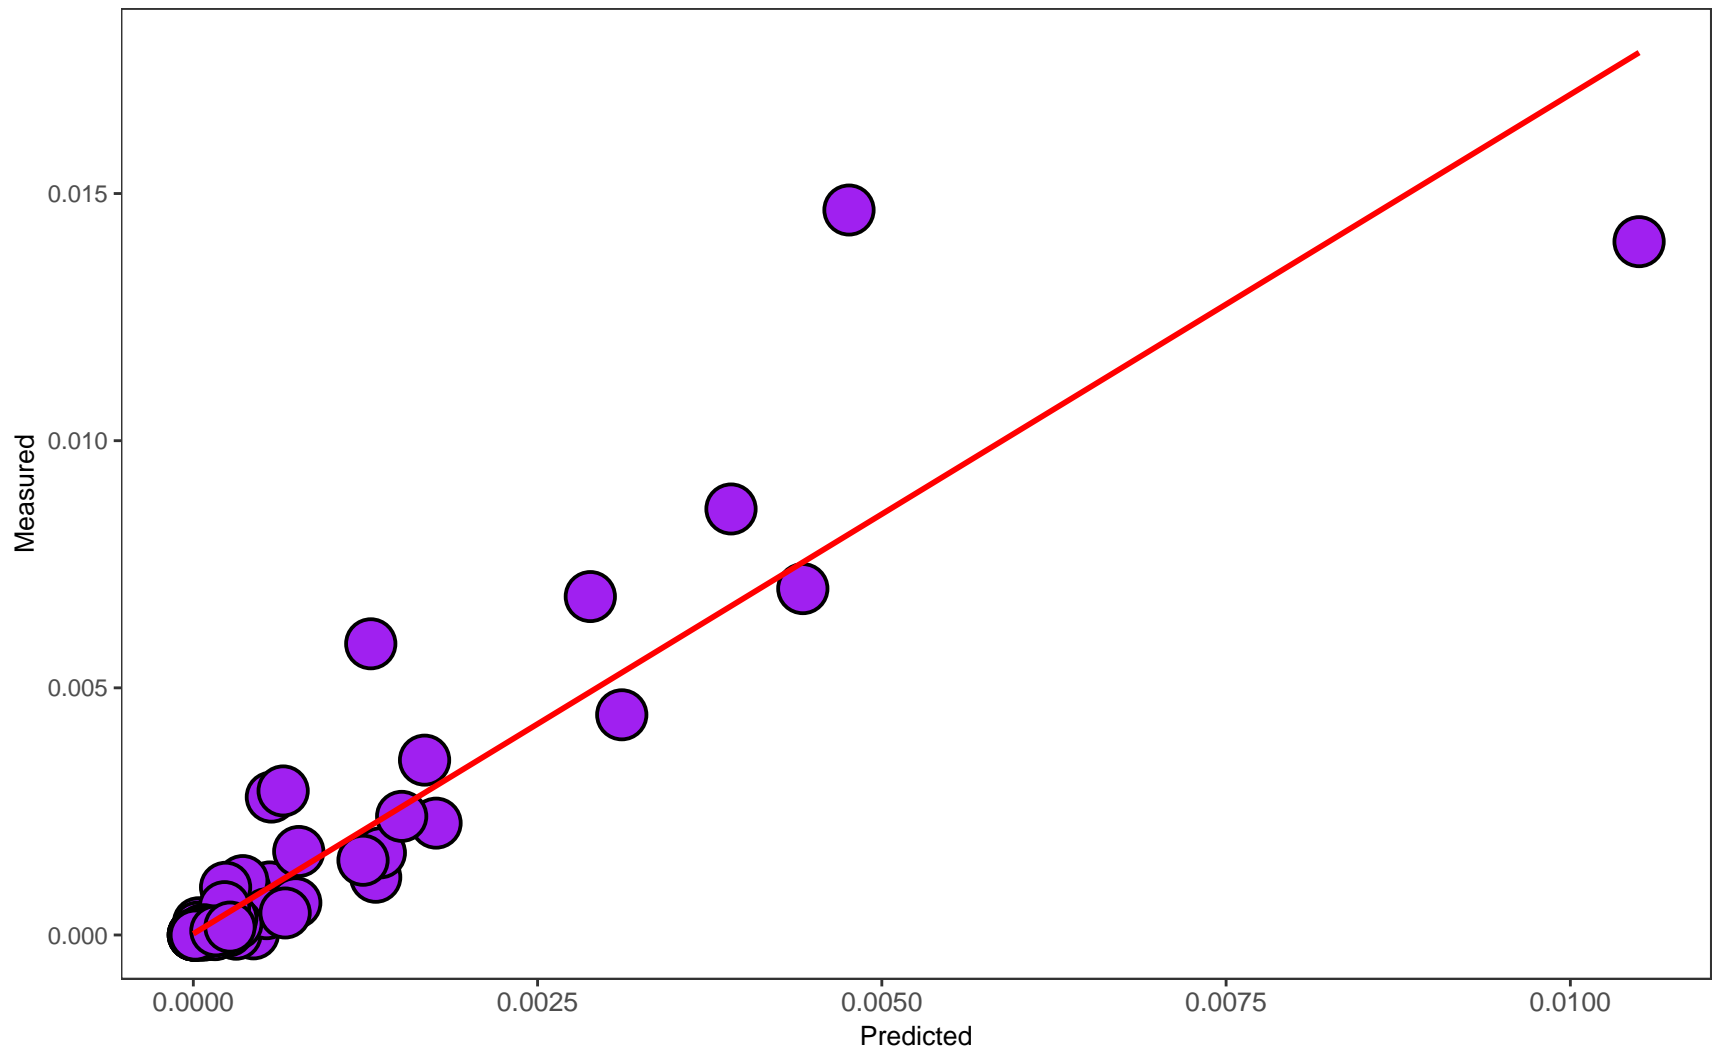

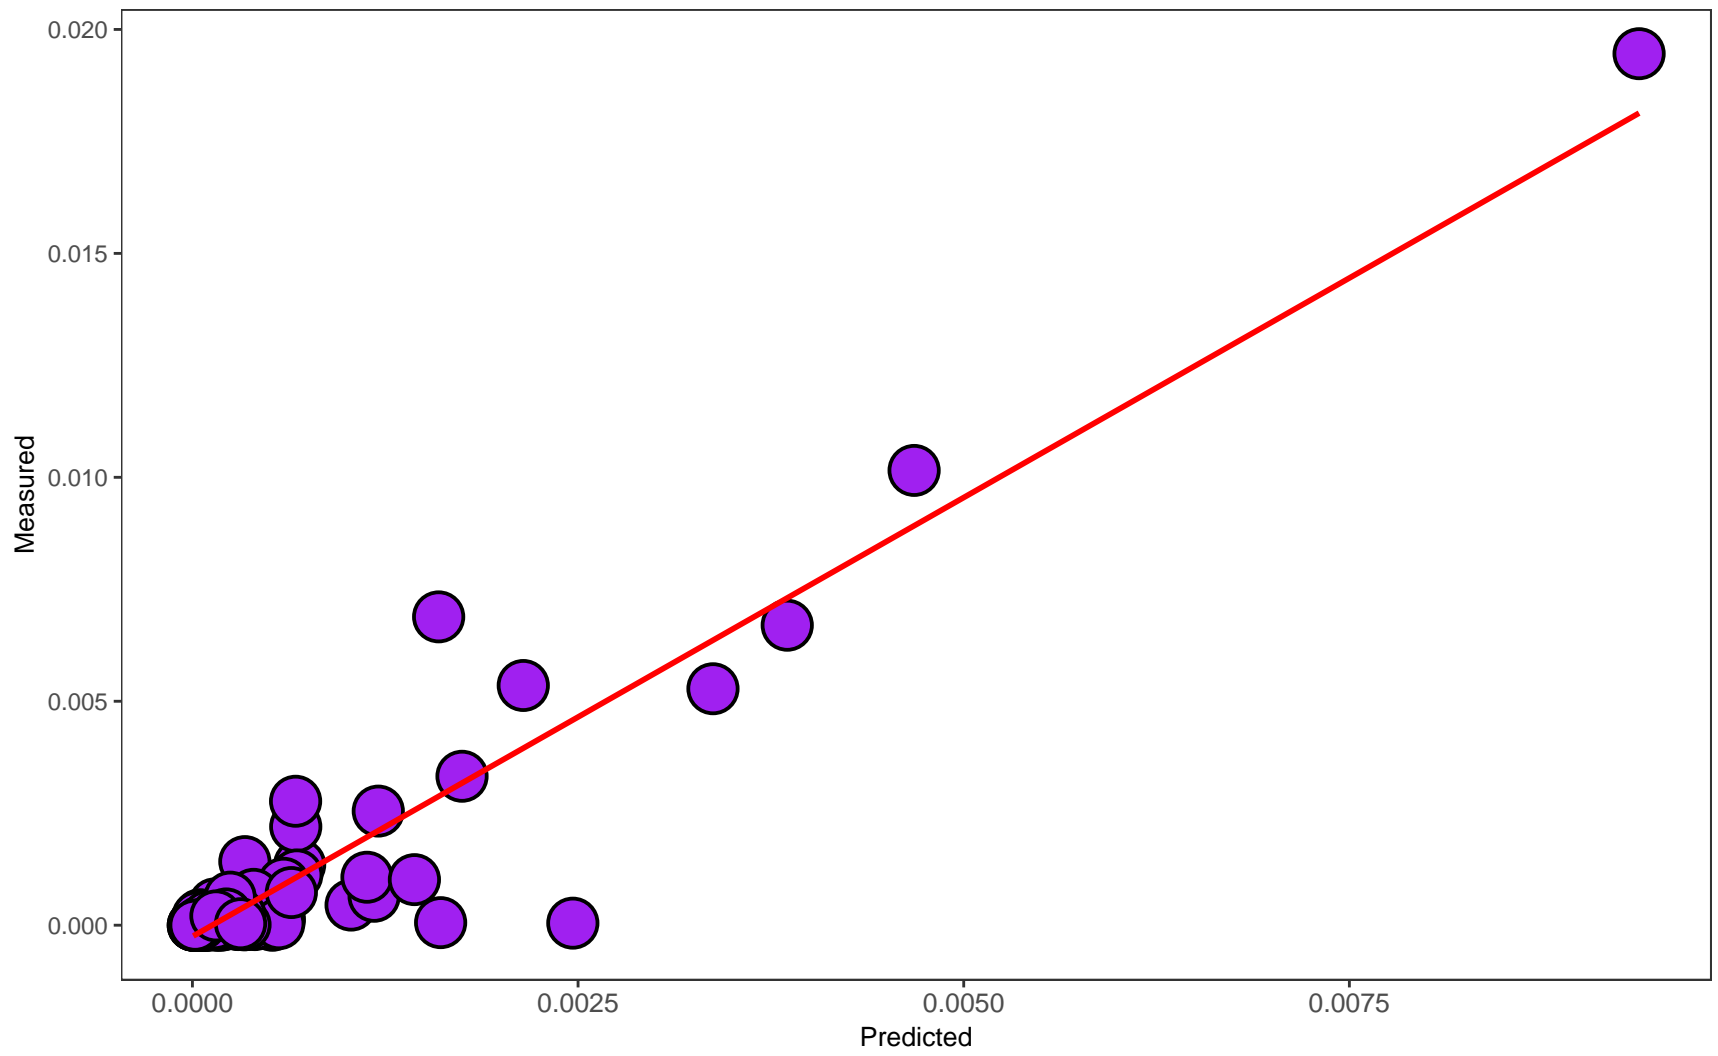

LLDeep\_0021\_HC: Spearman 0.77

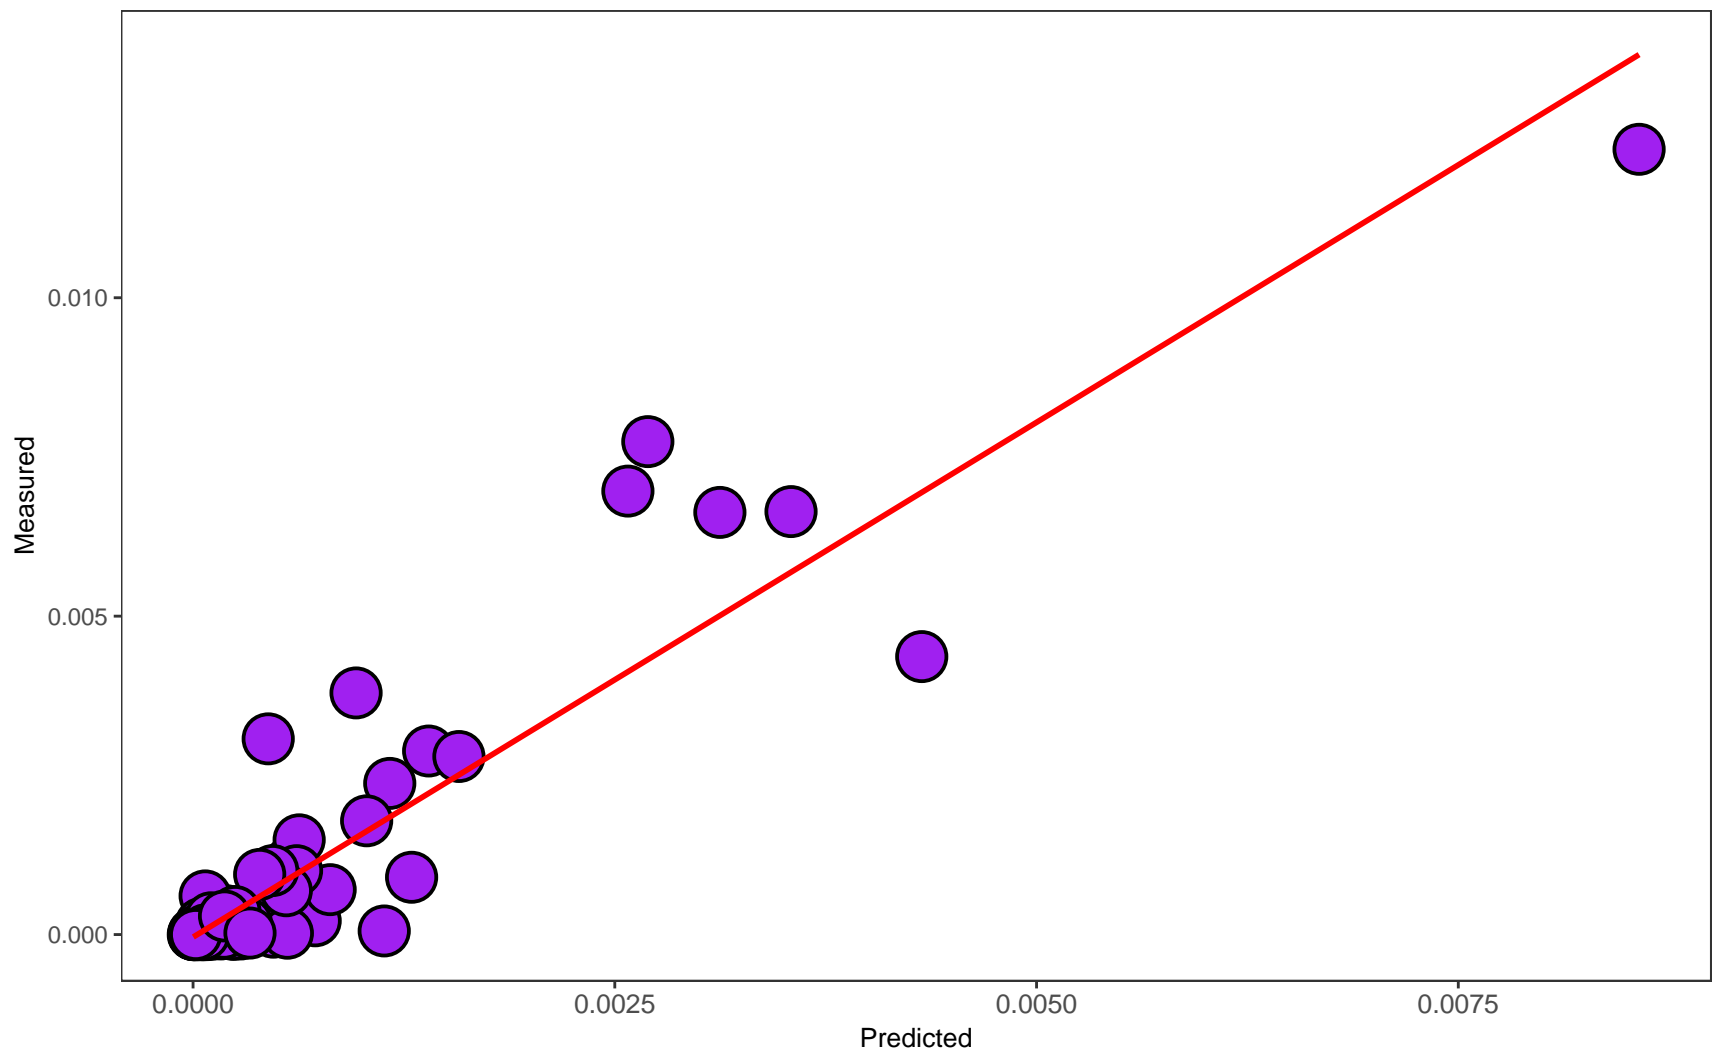



LLDeep\_0022\_HC: Spearman 0.75

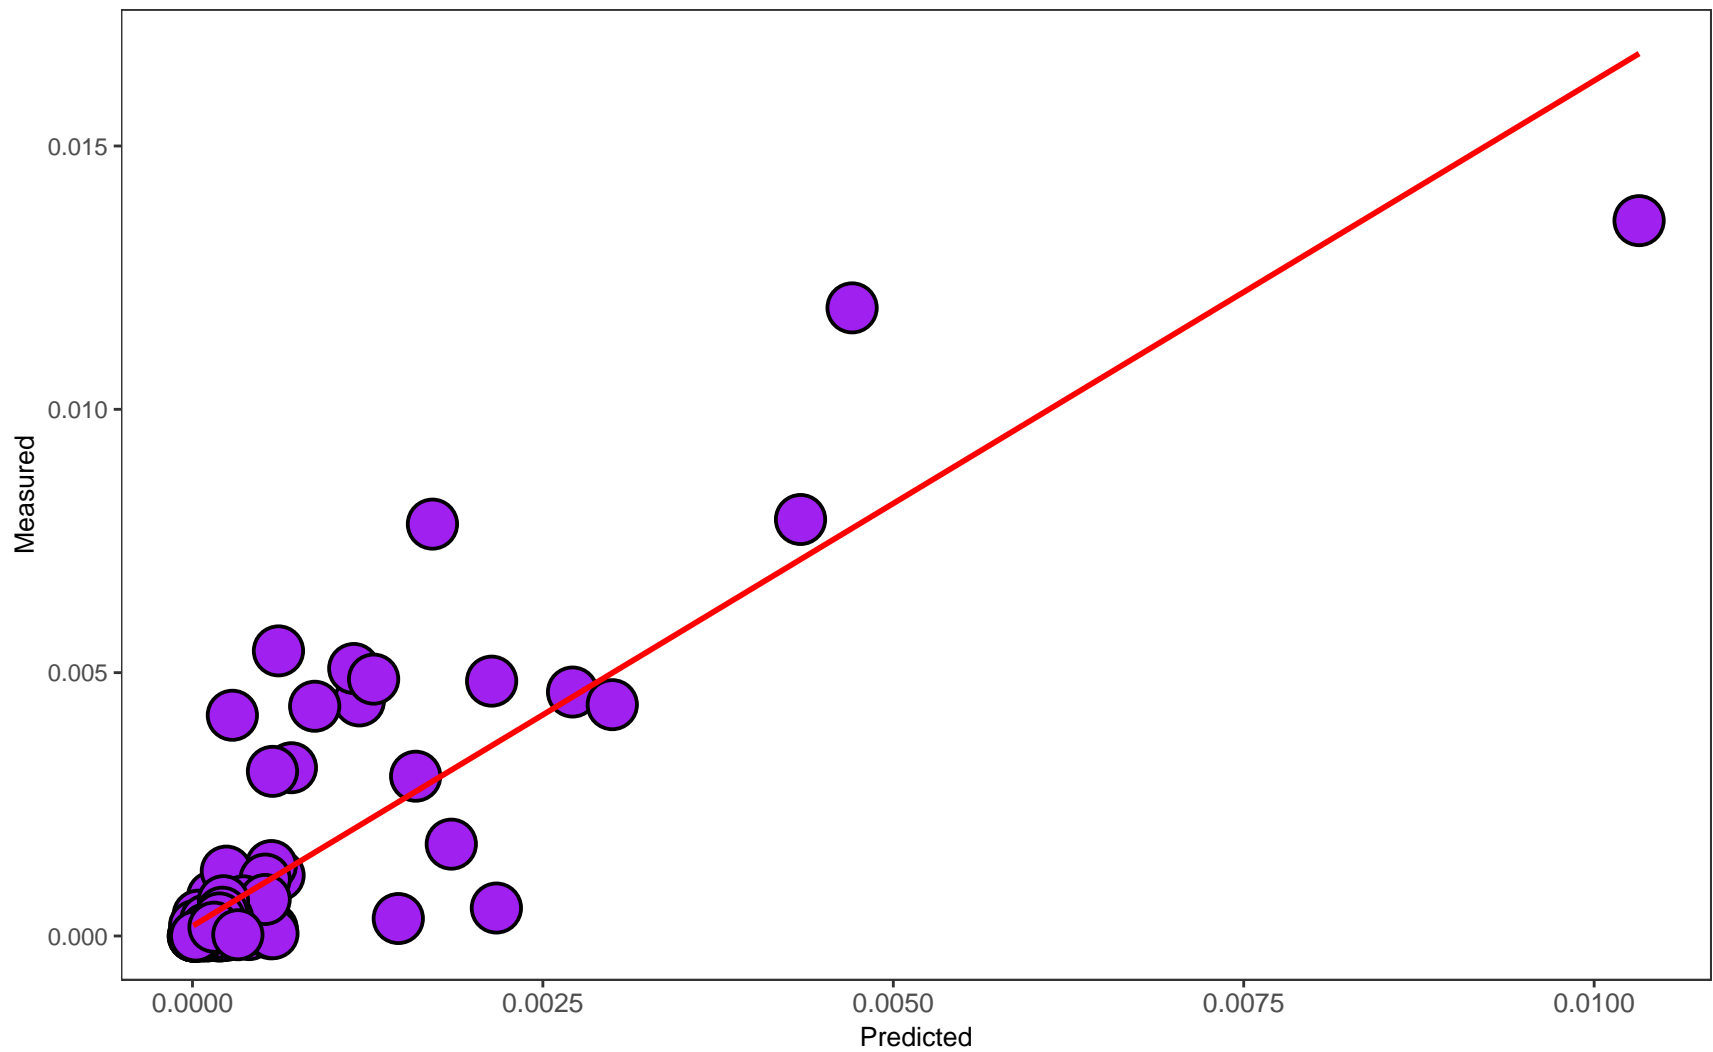

LLDeep\_0024\_HC: Spearman 0.64

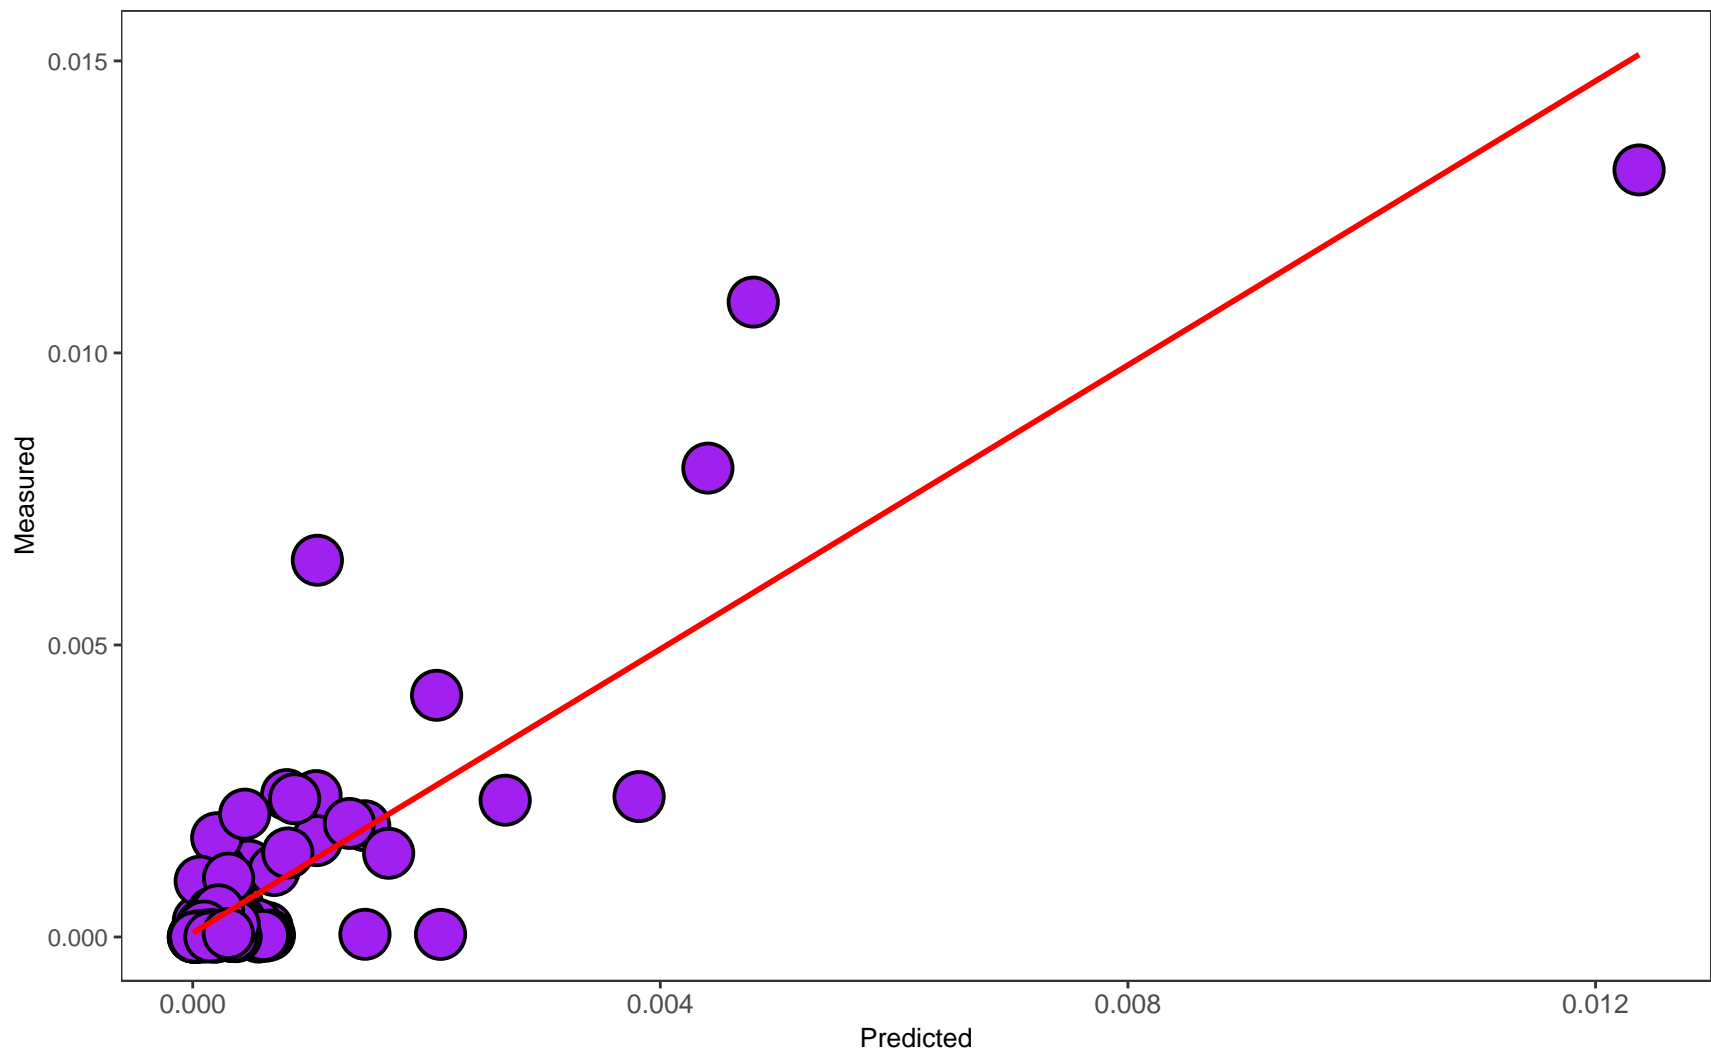

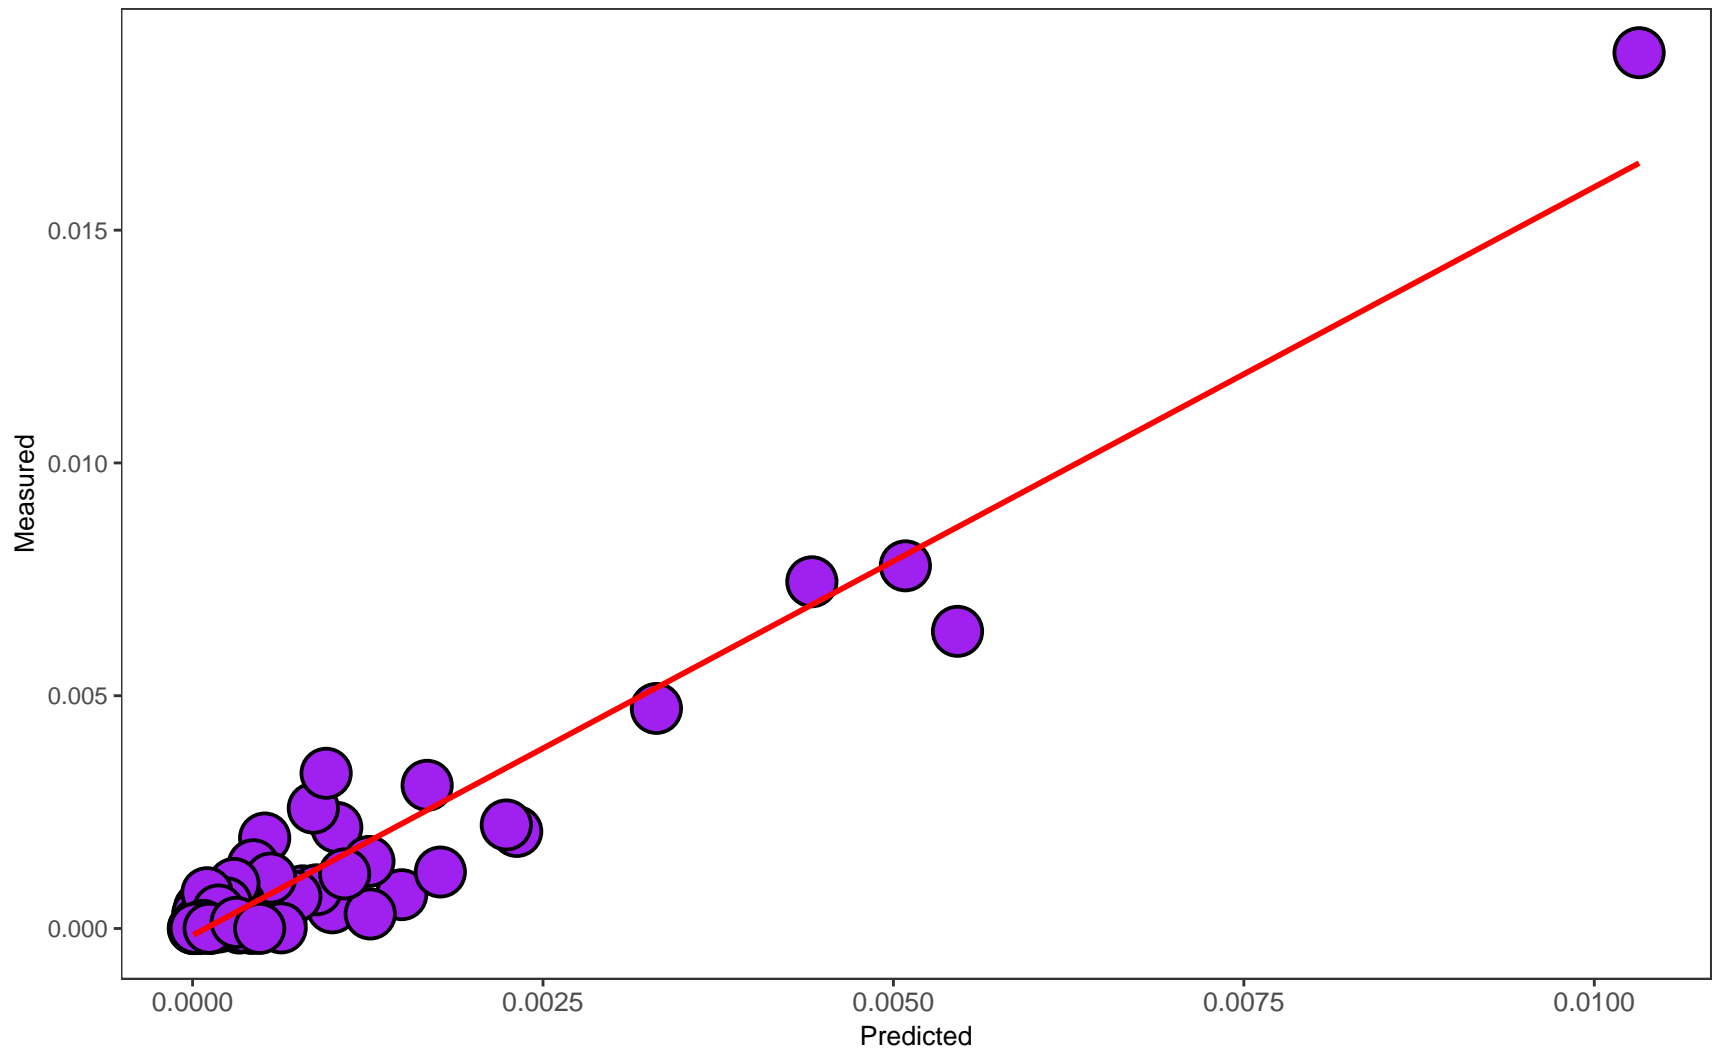

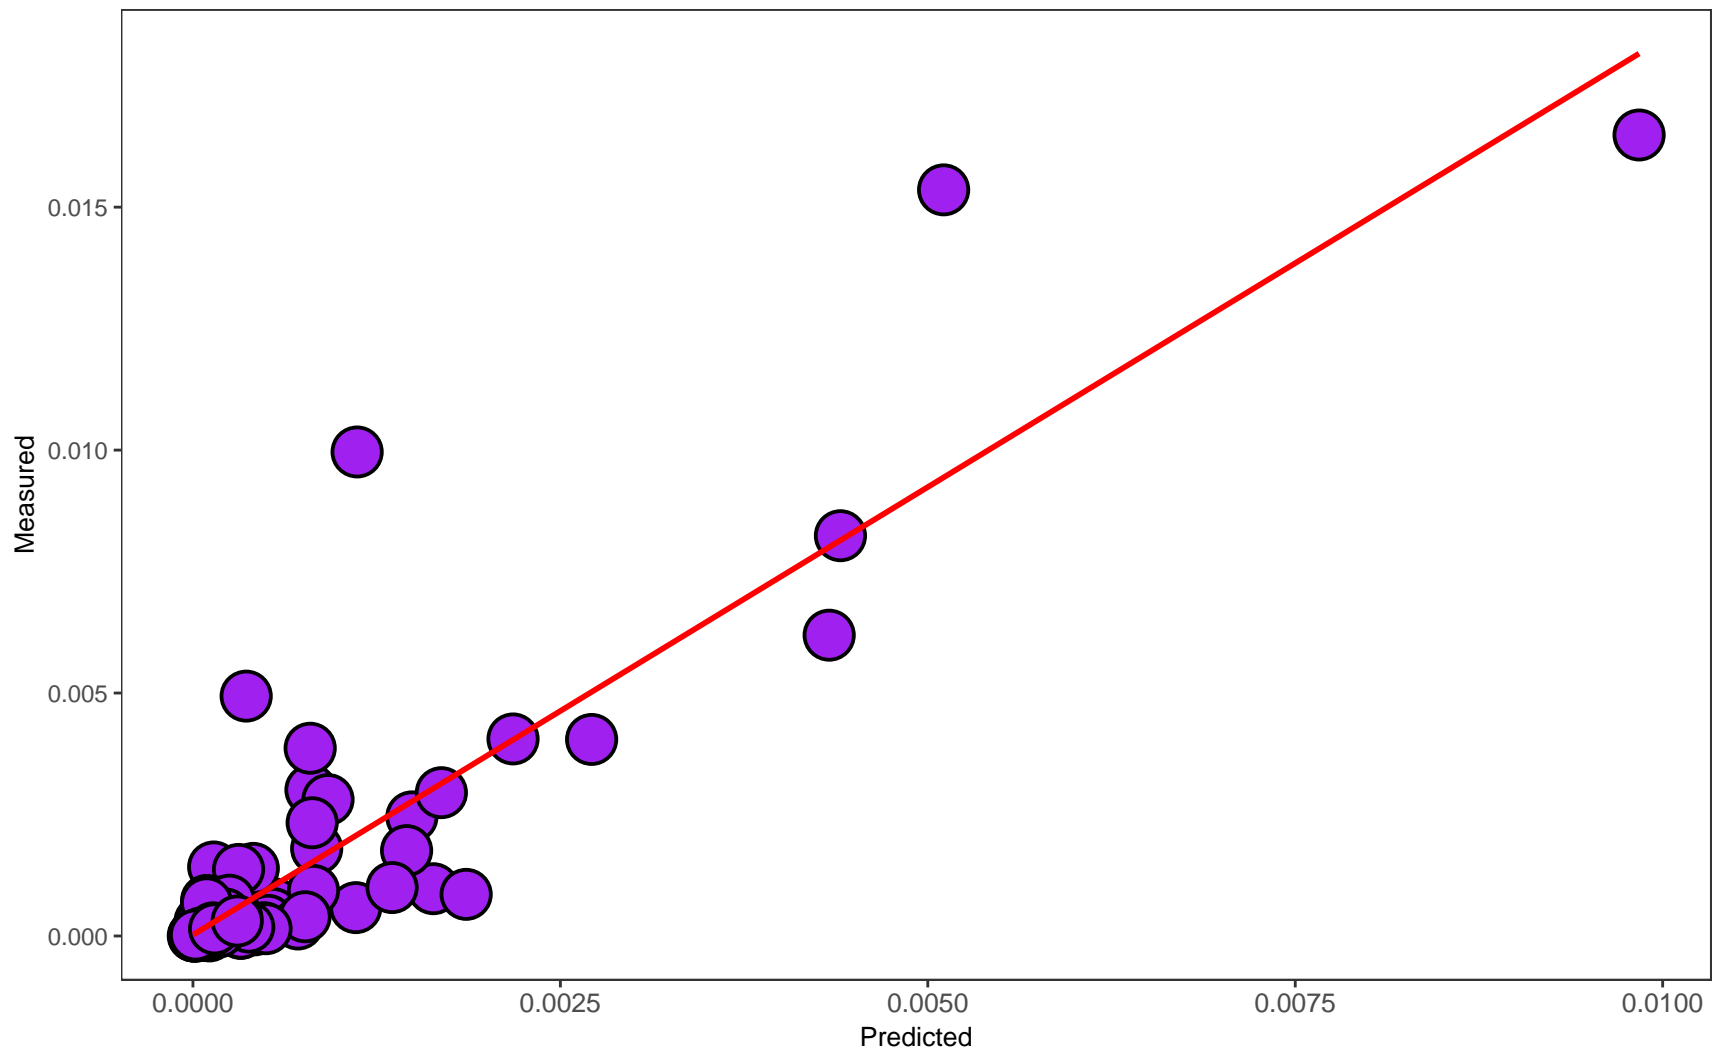

LLDeep\_0028\_HC: Spearman 0.55

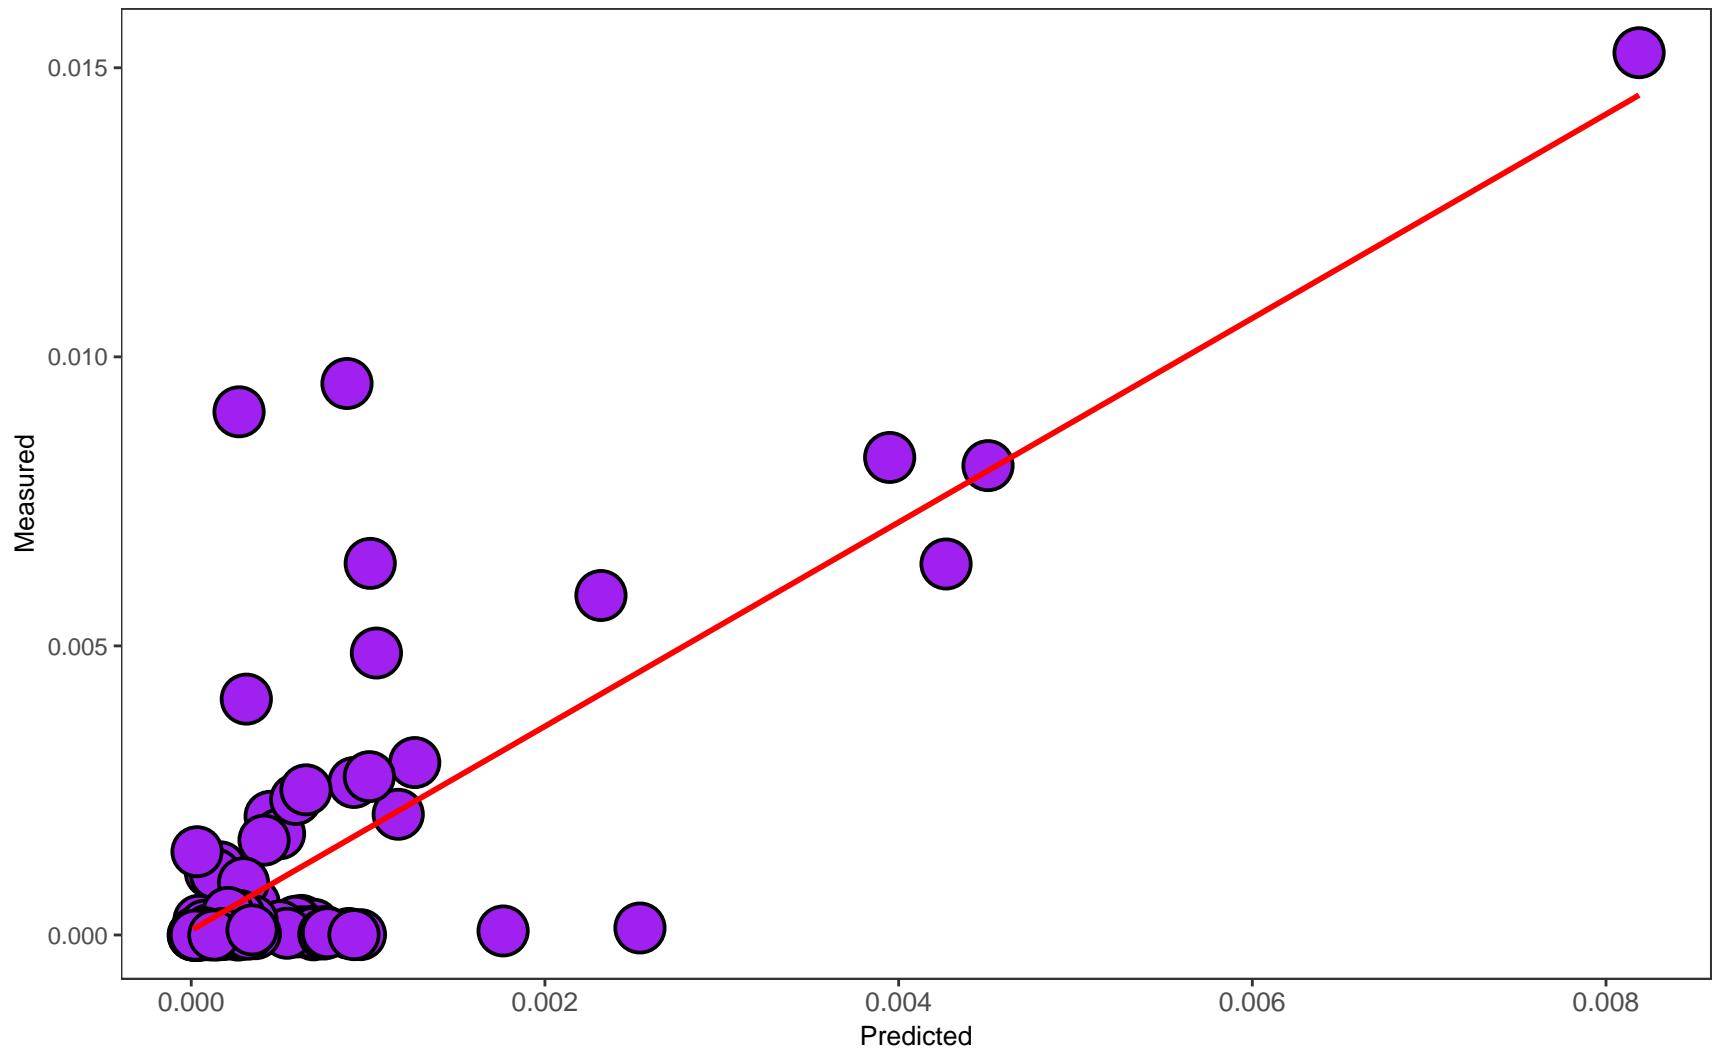





LLDeep\_0033\_HC: Spearman 0.73

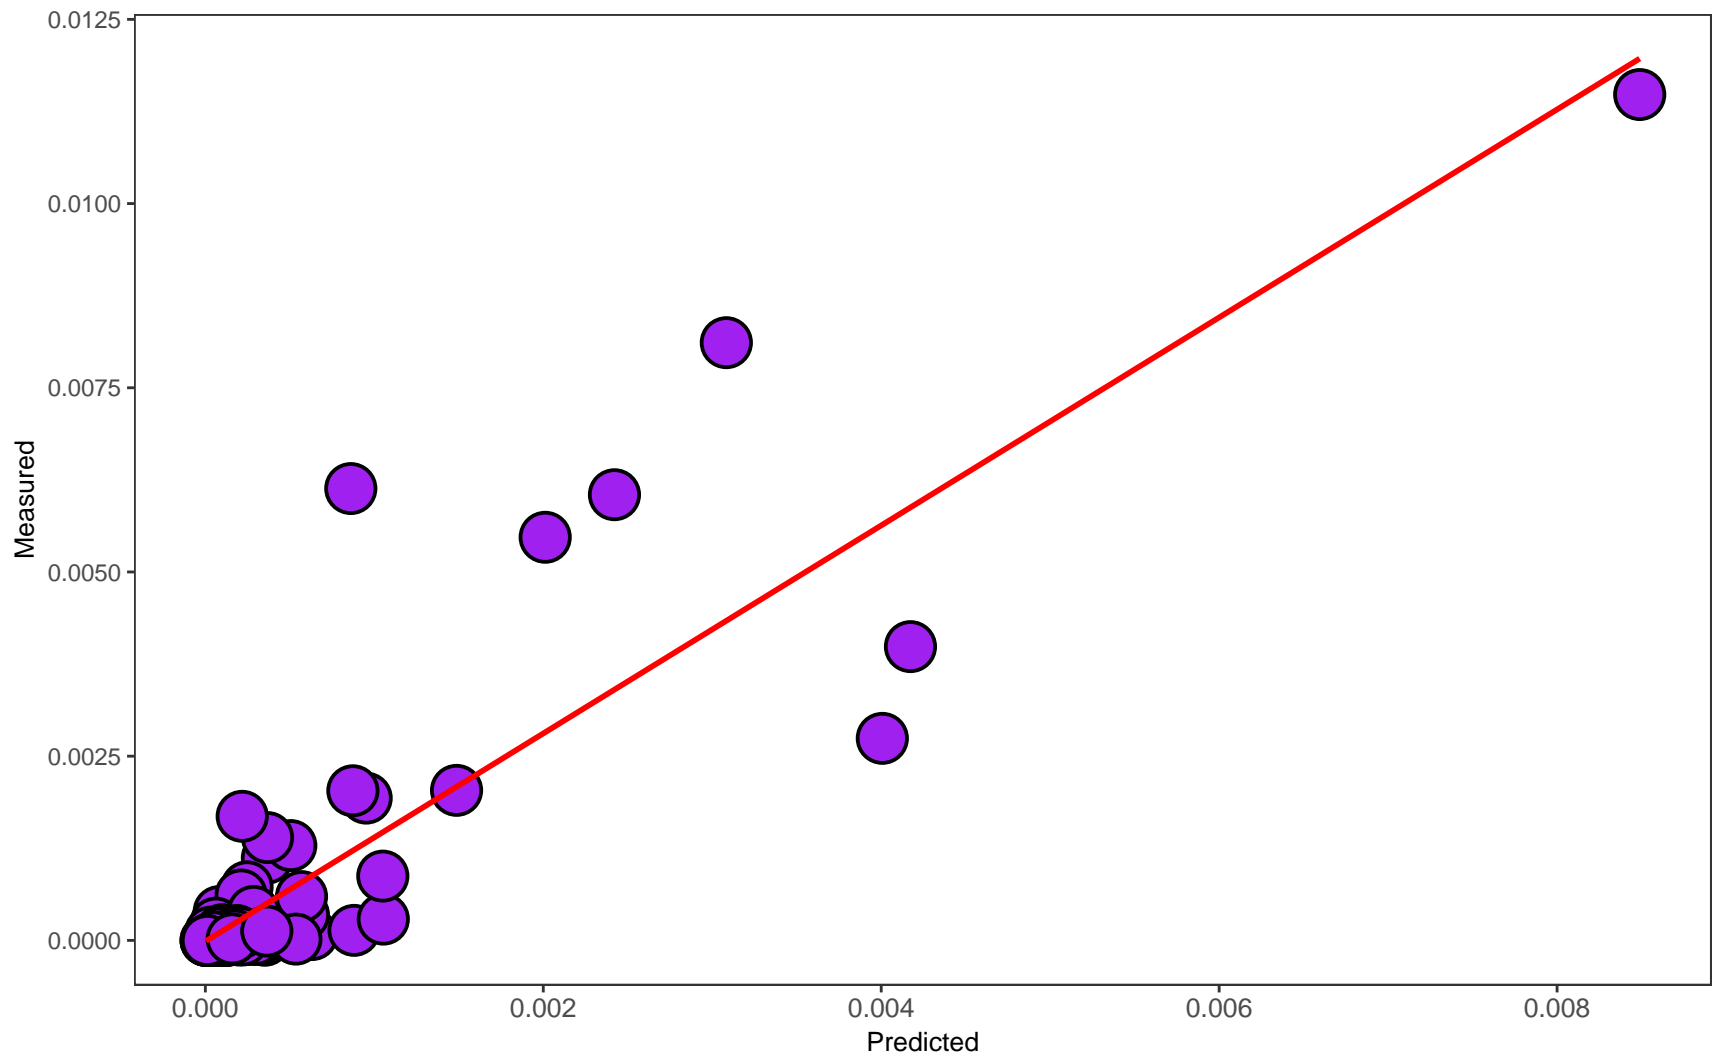



LLDeep\_0034\_HC: Spearman 0.75

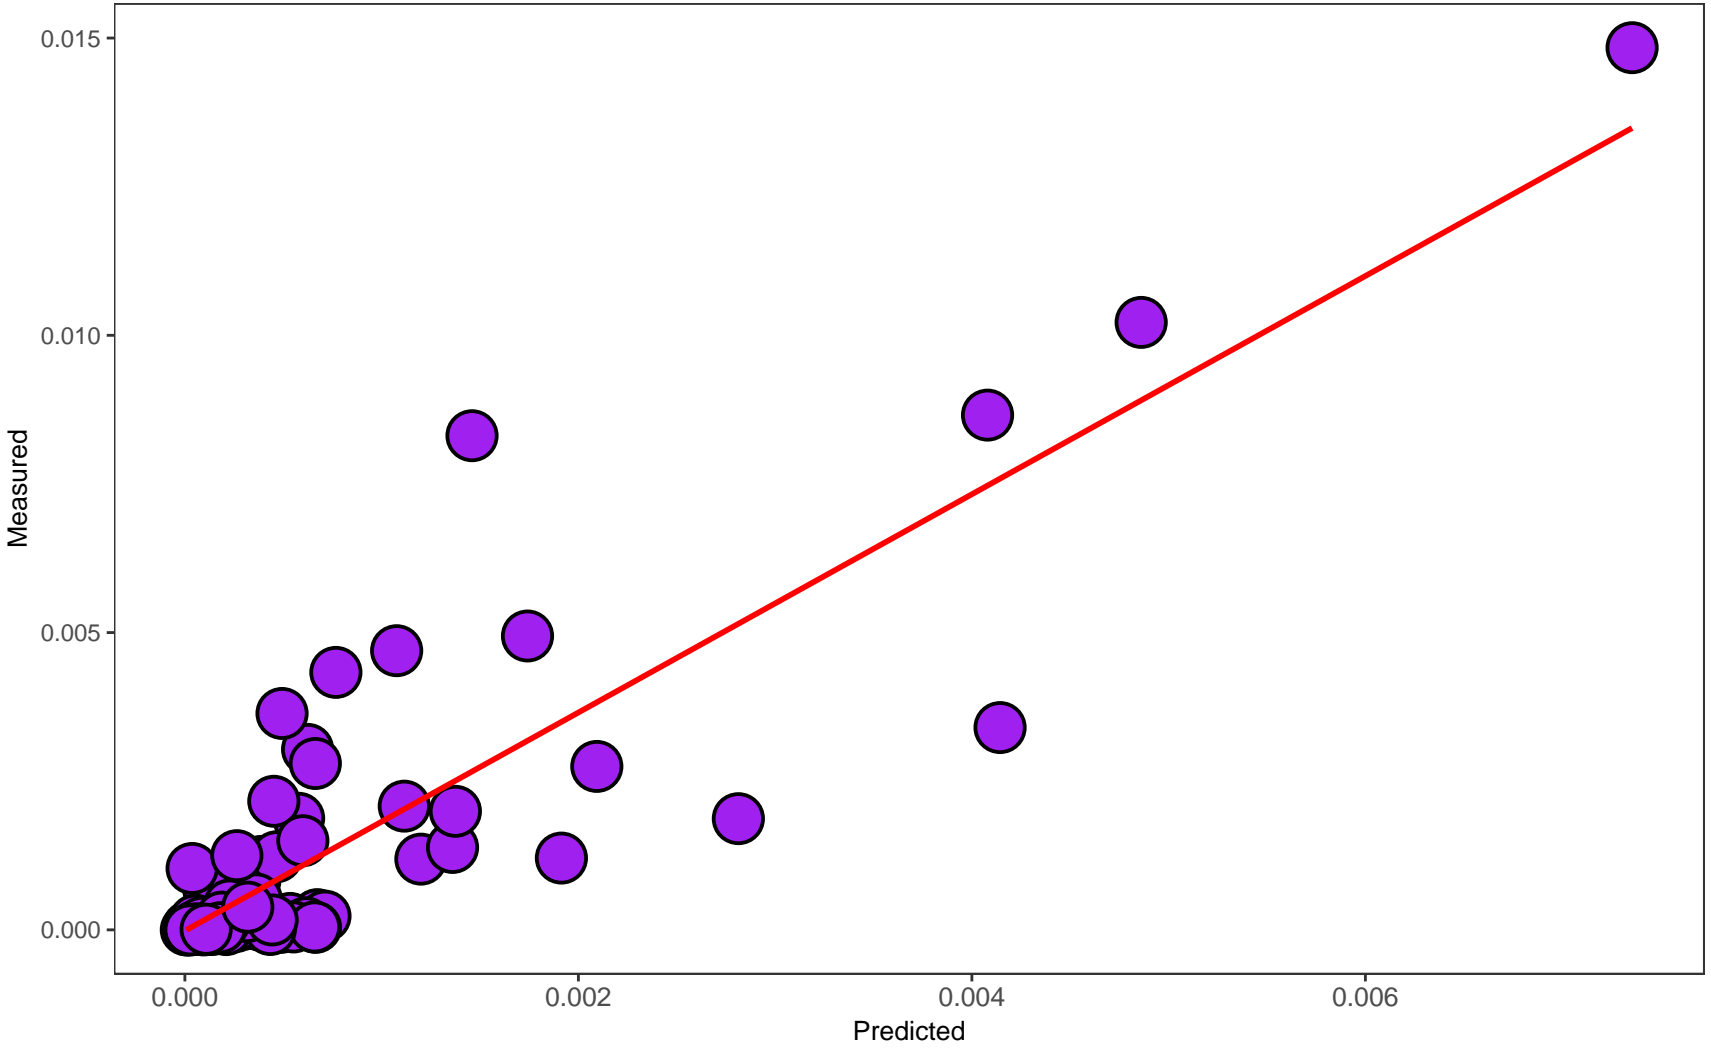

LLDeep\_0037\_HC: Spearman 0.67

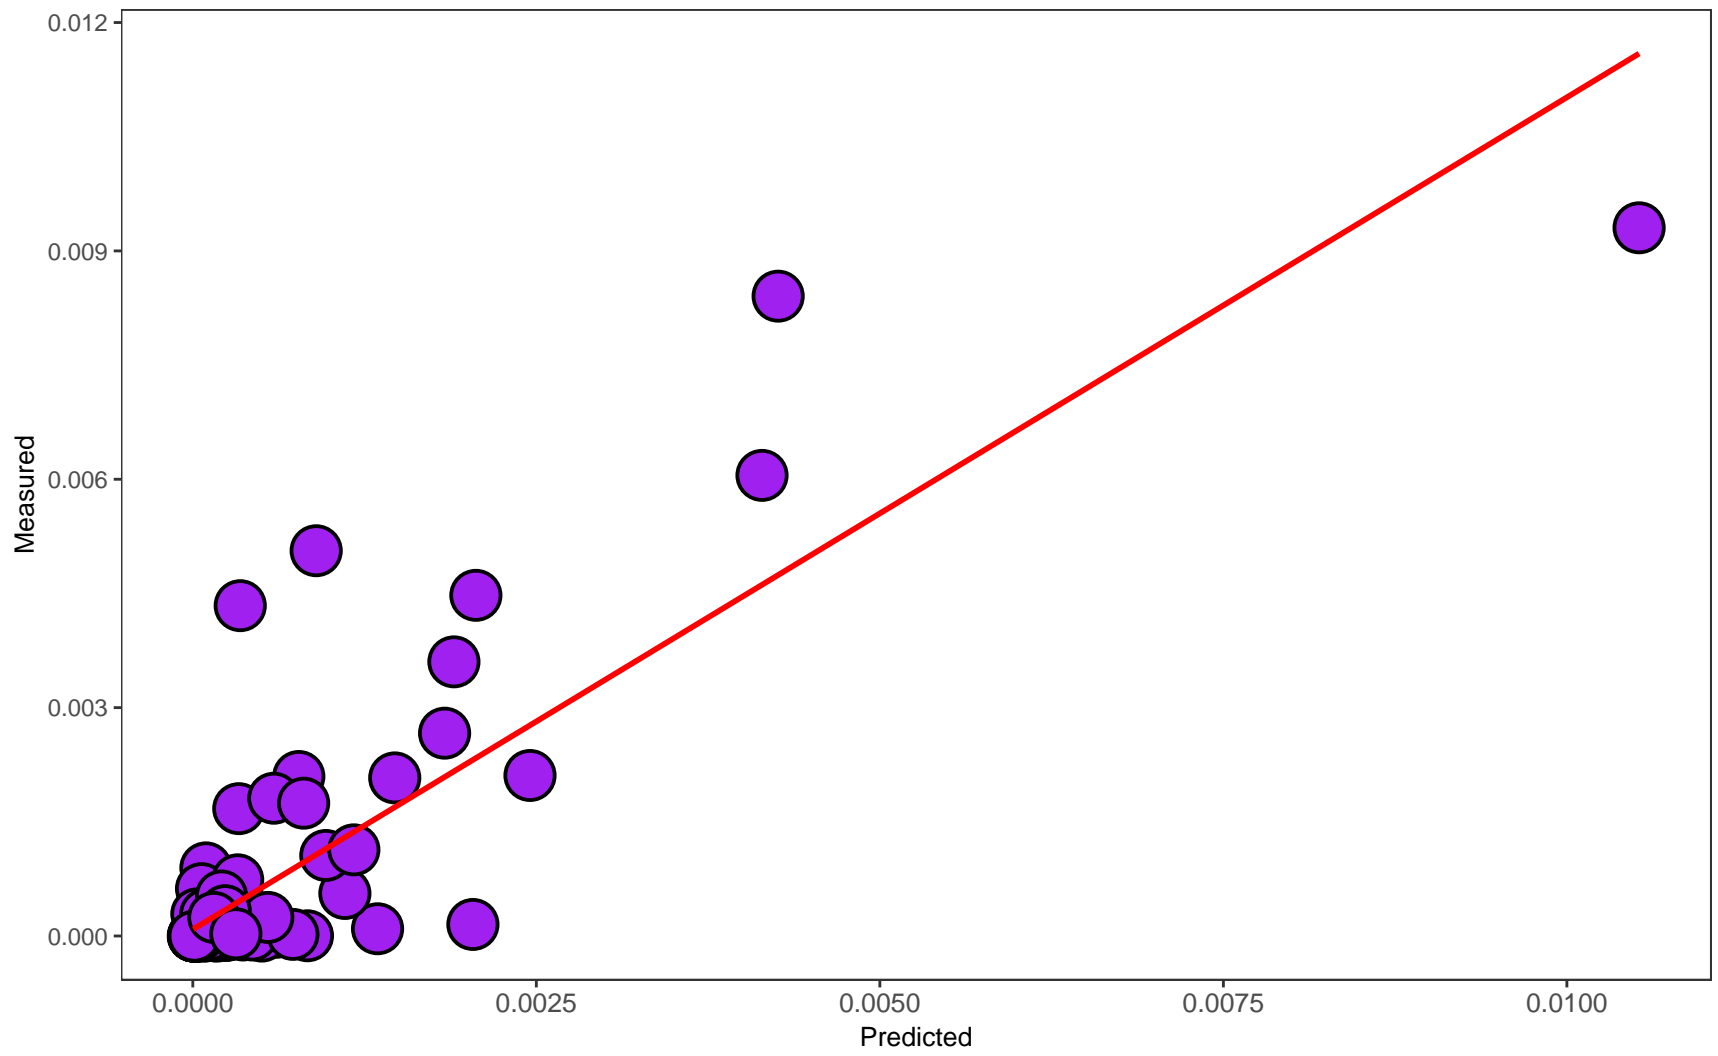

LLDeep\_0039\_HC: Spearman 0.74

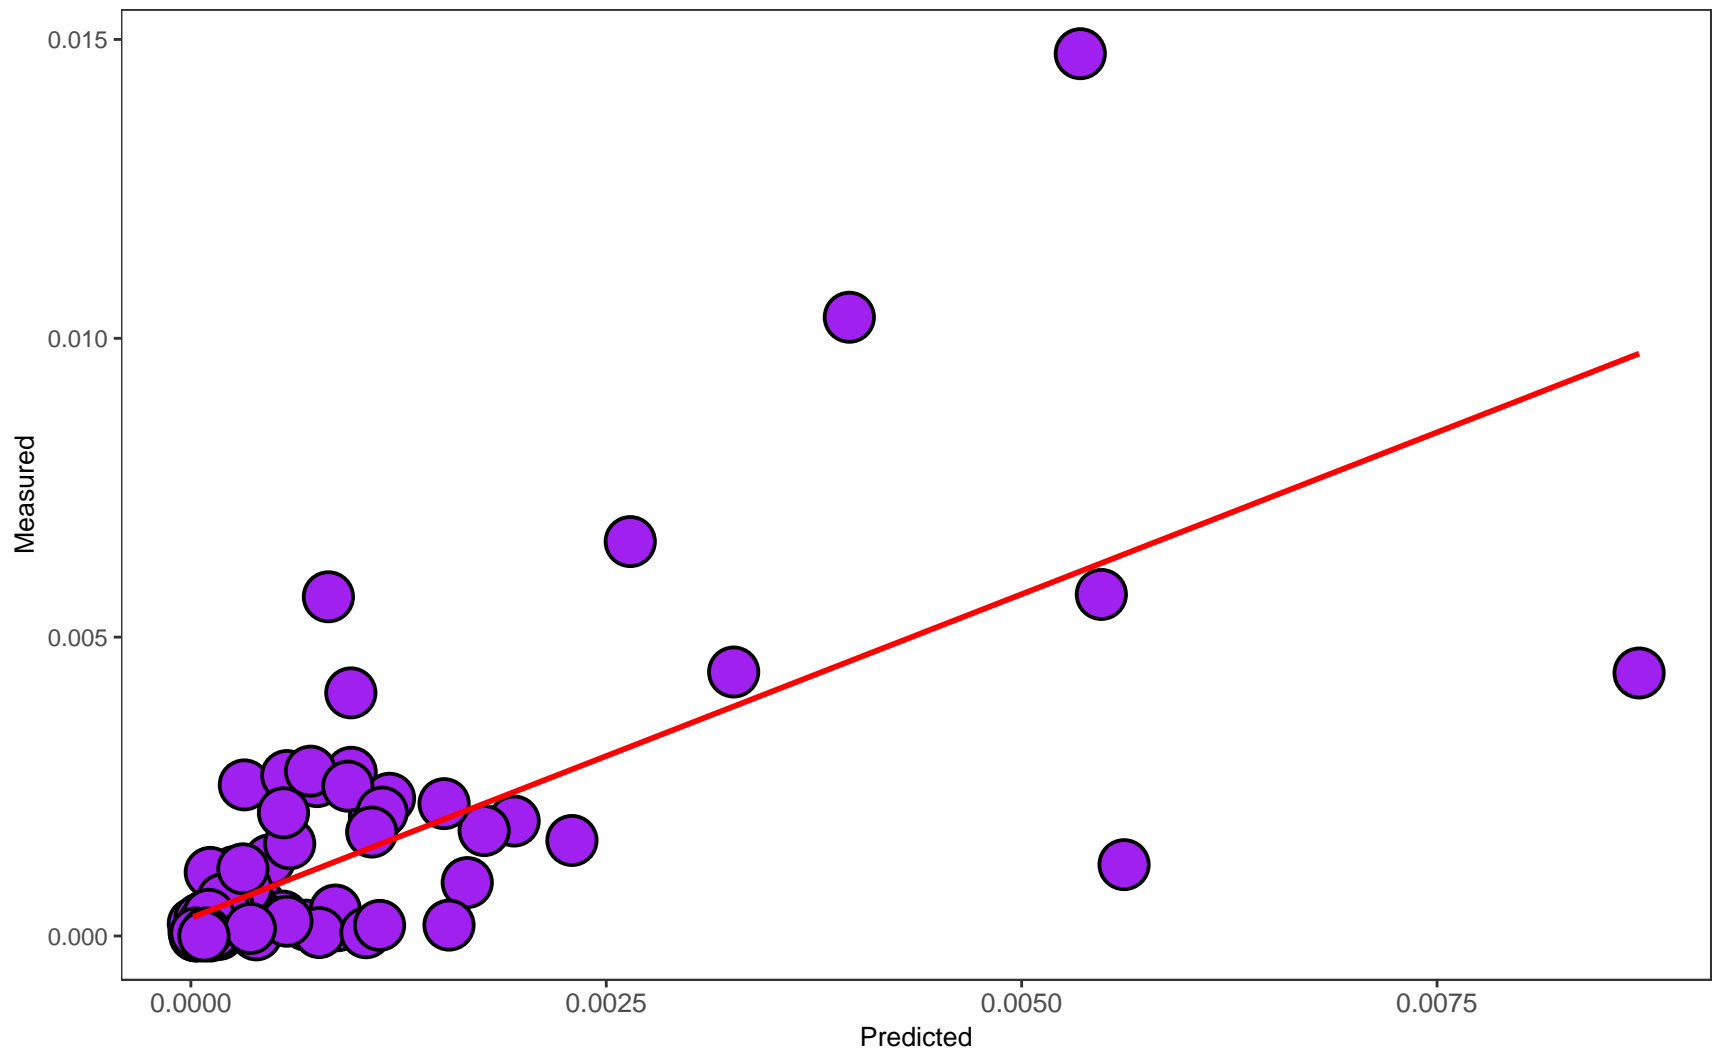

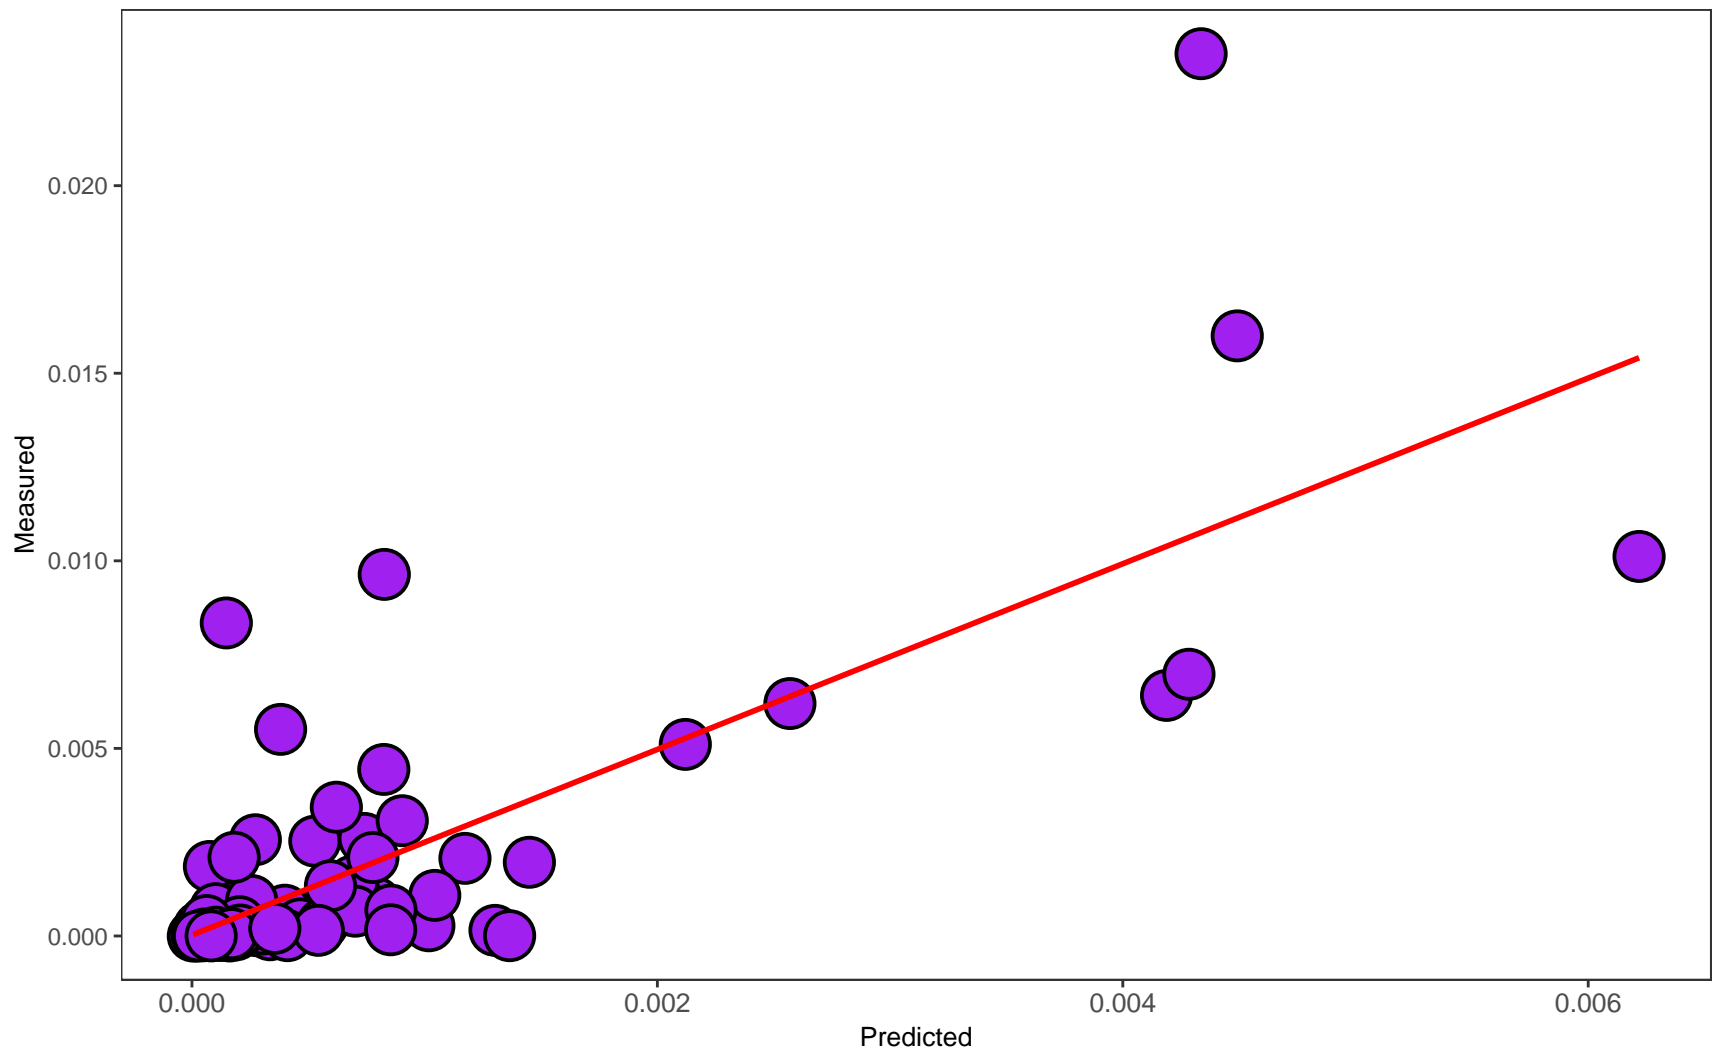

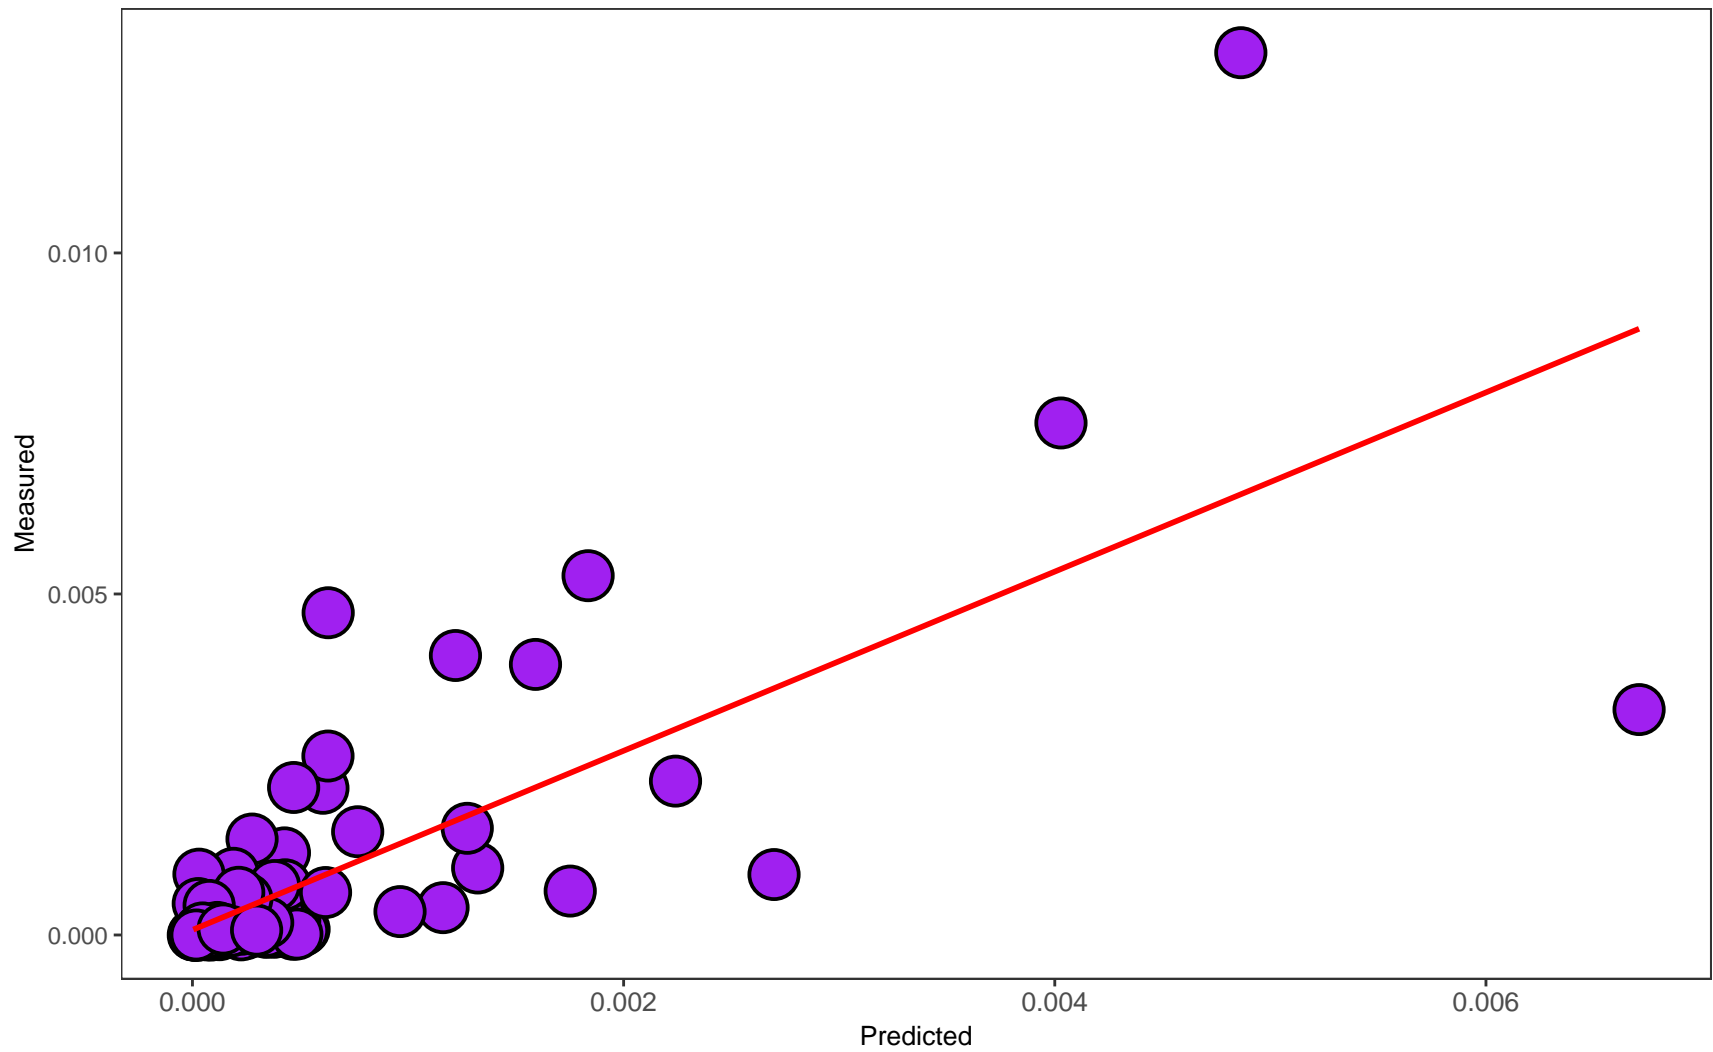

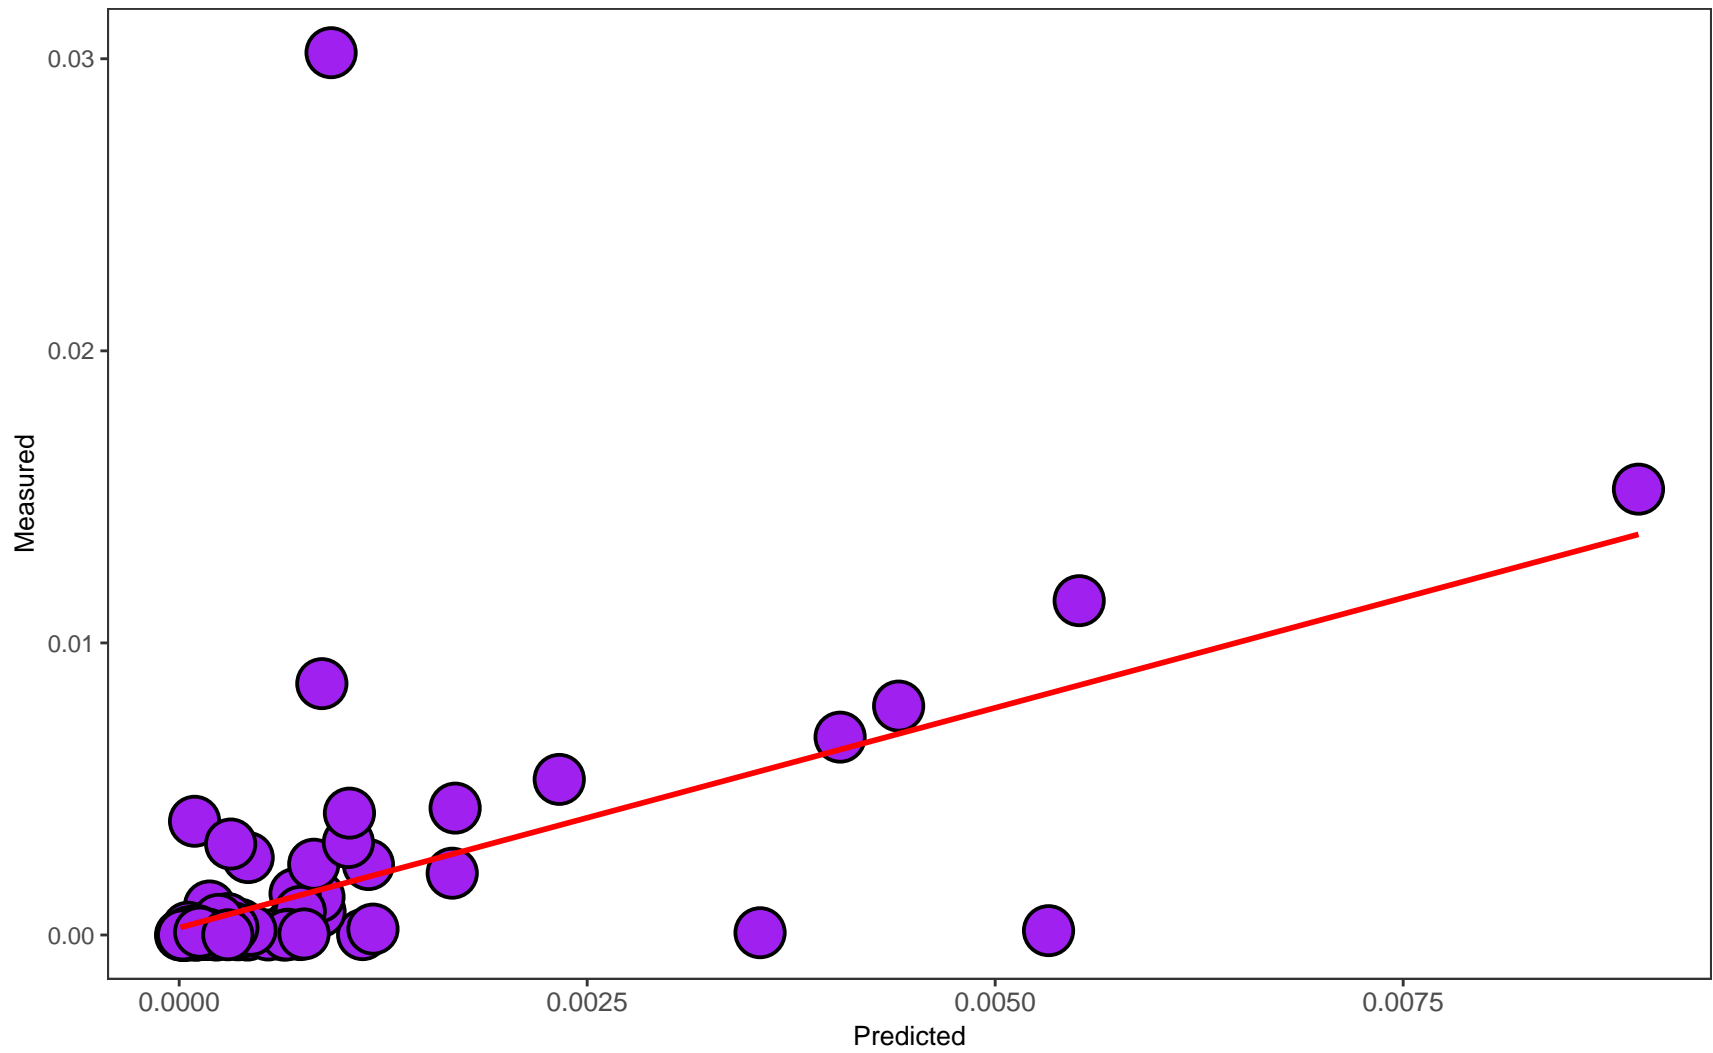



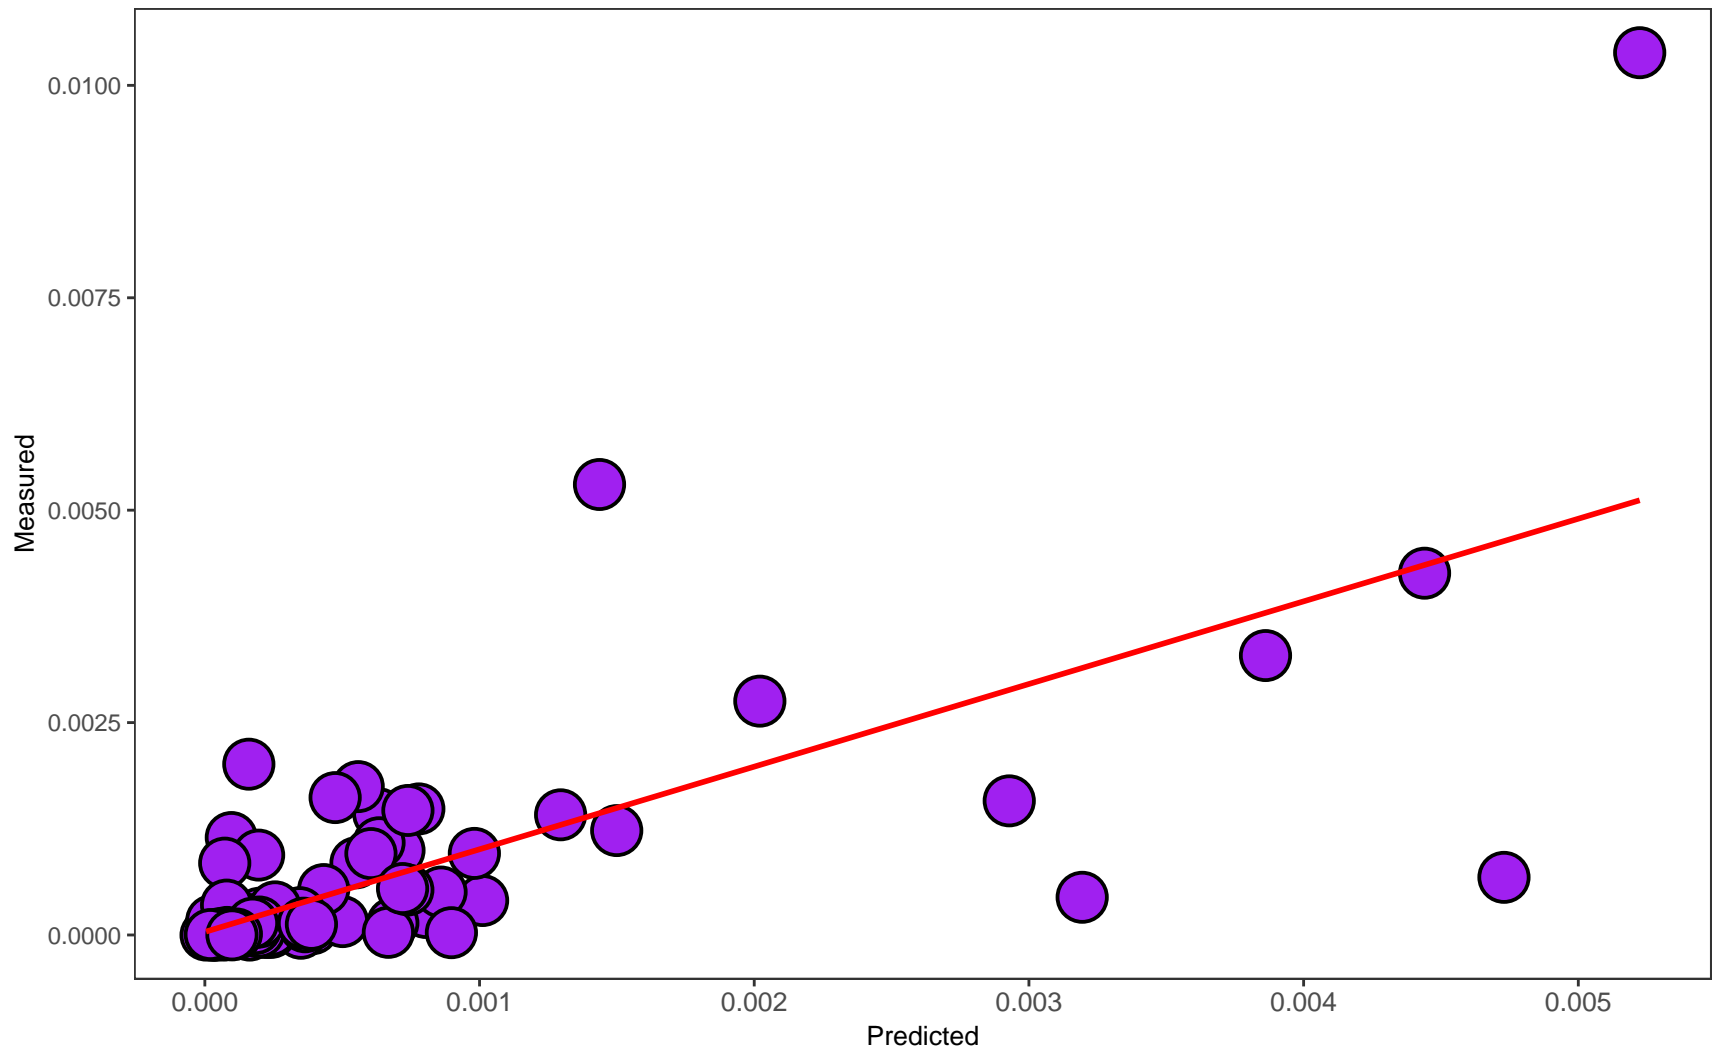



UMCGIBD00030\_CD: Spearman 0.74

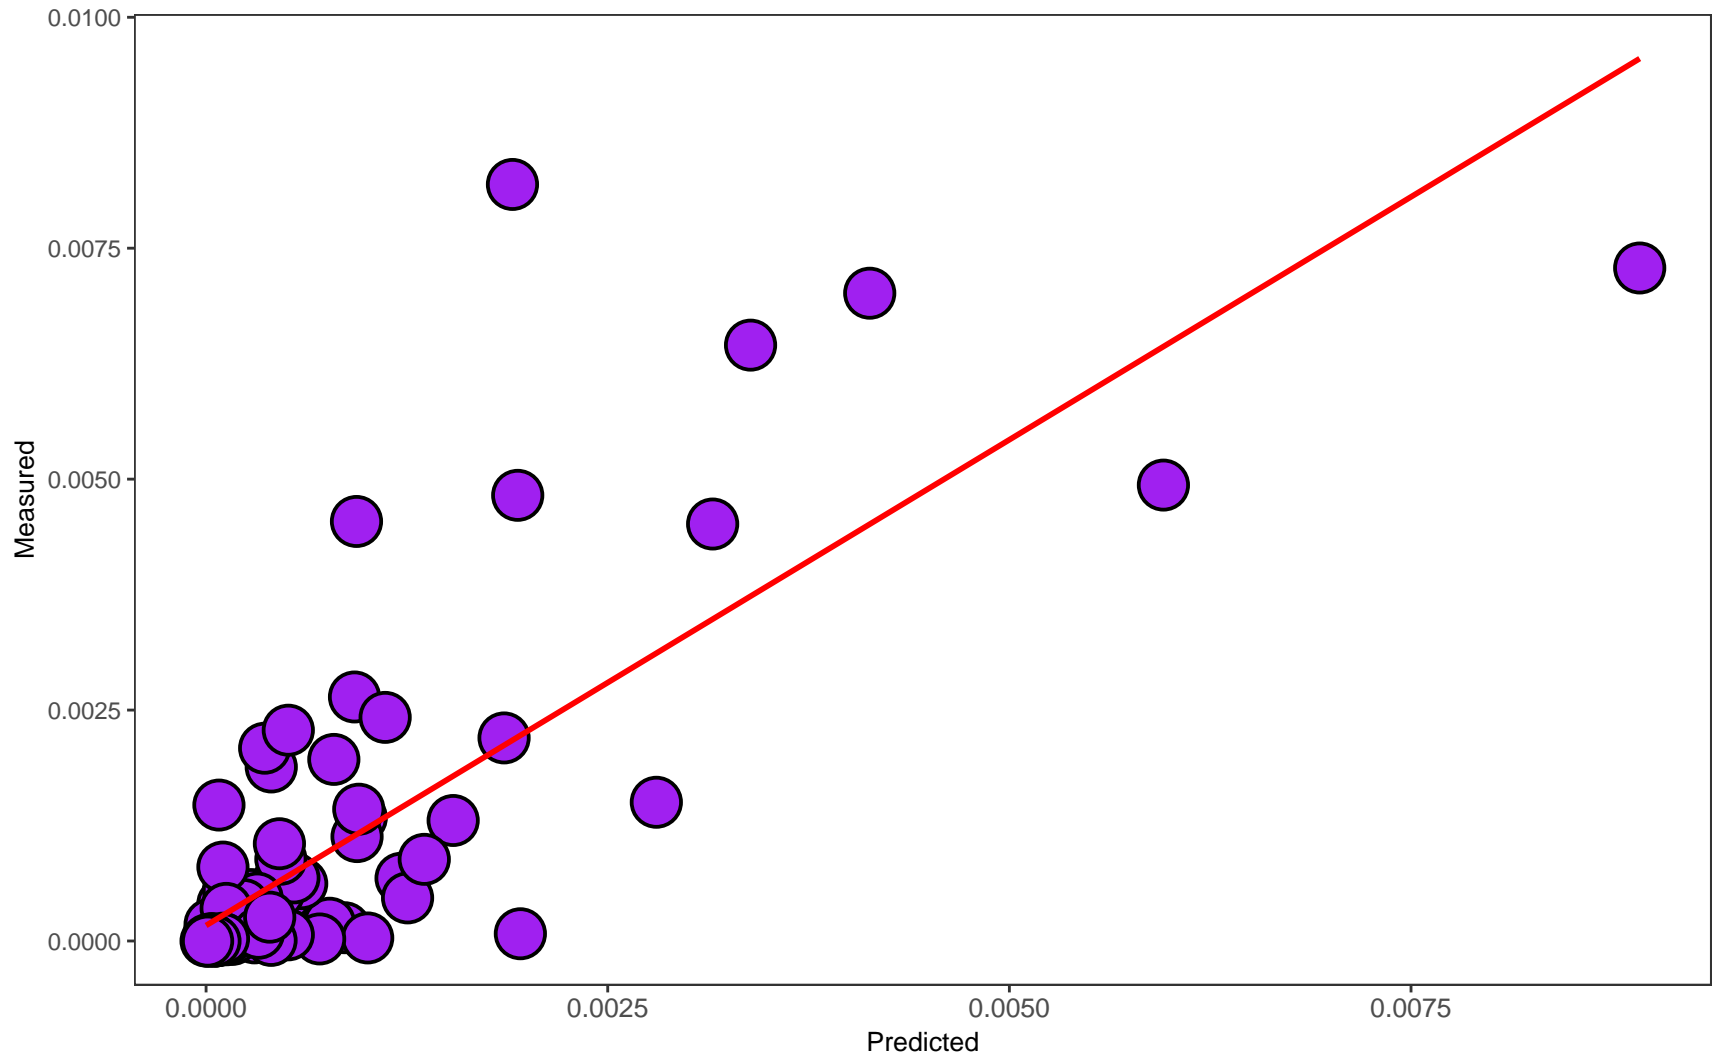

UMCGIBD00167\_UC: Spearman 0.66

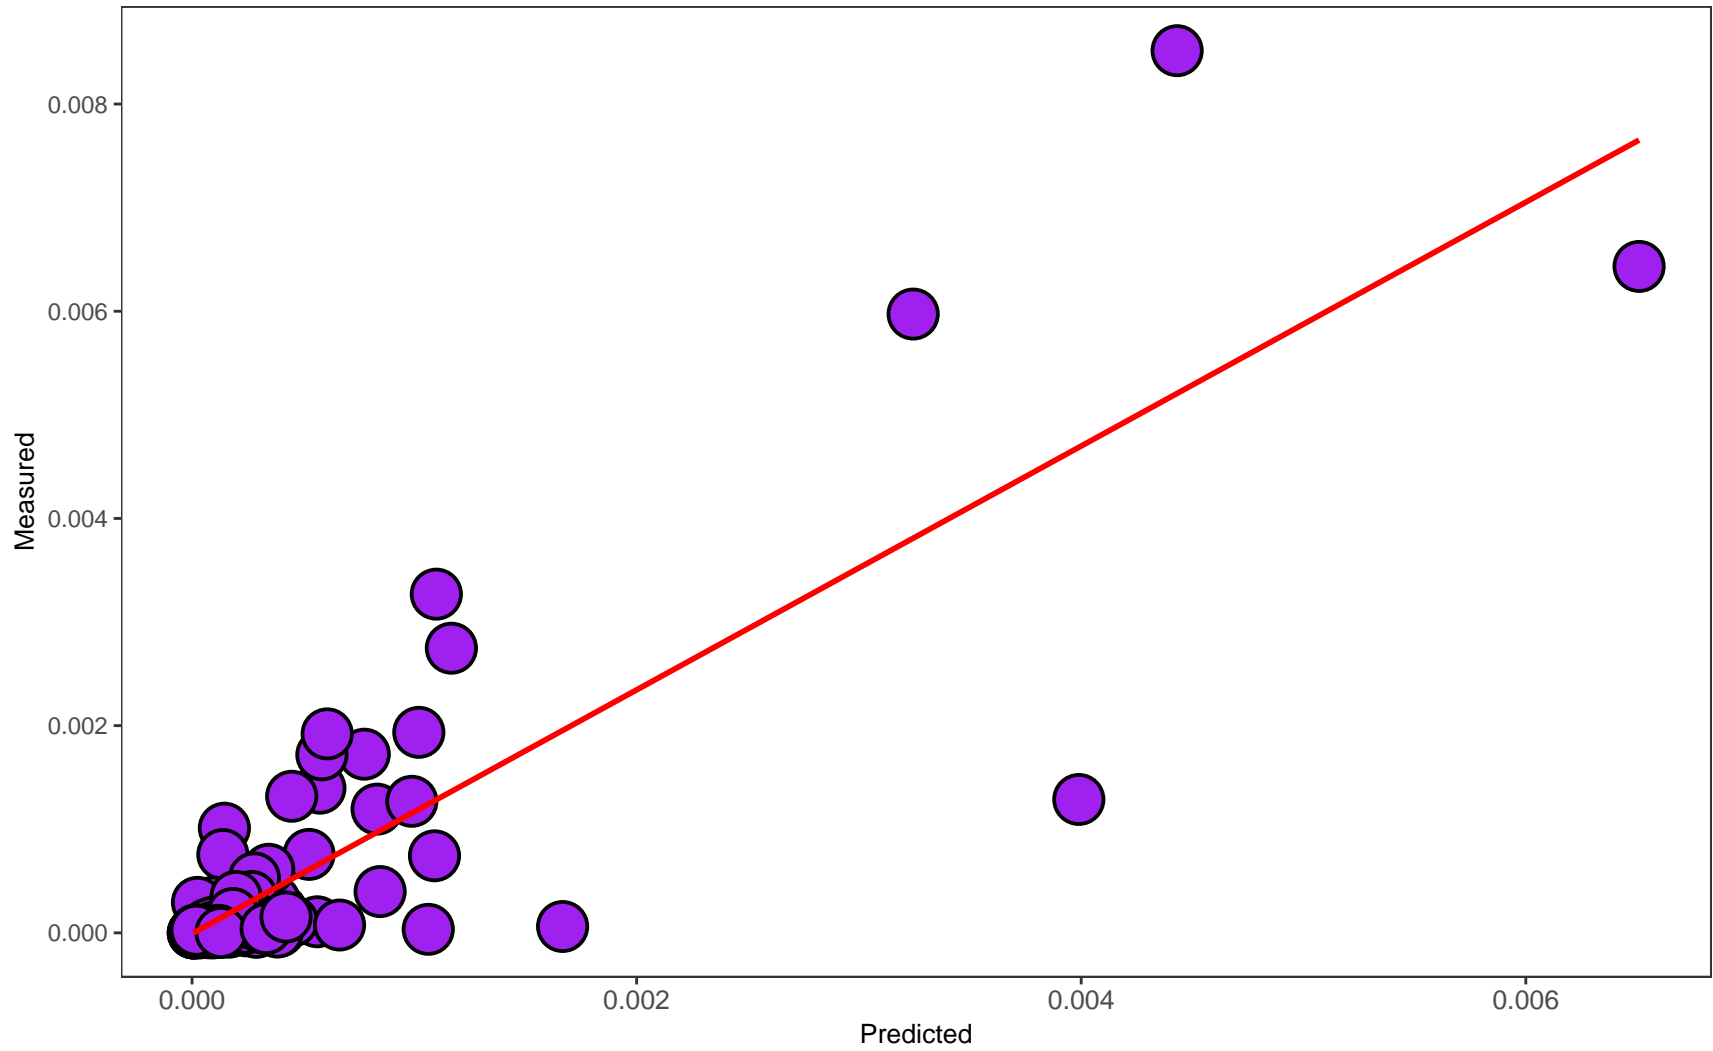

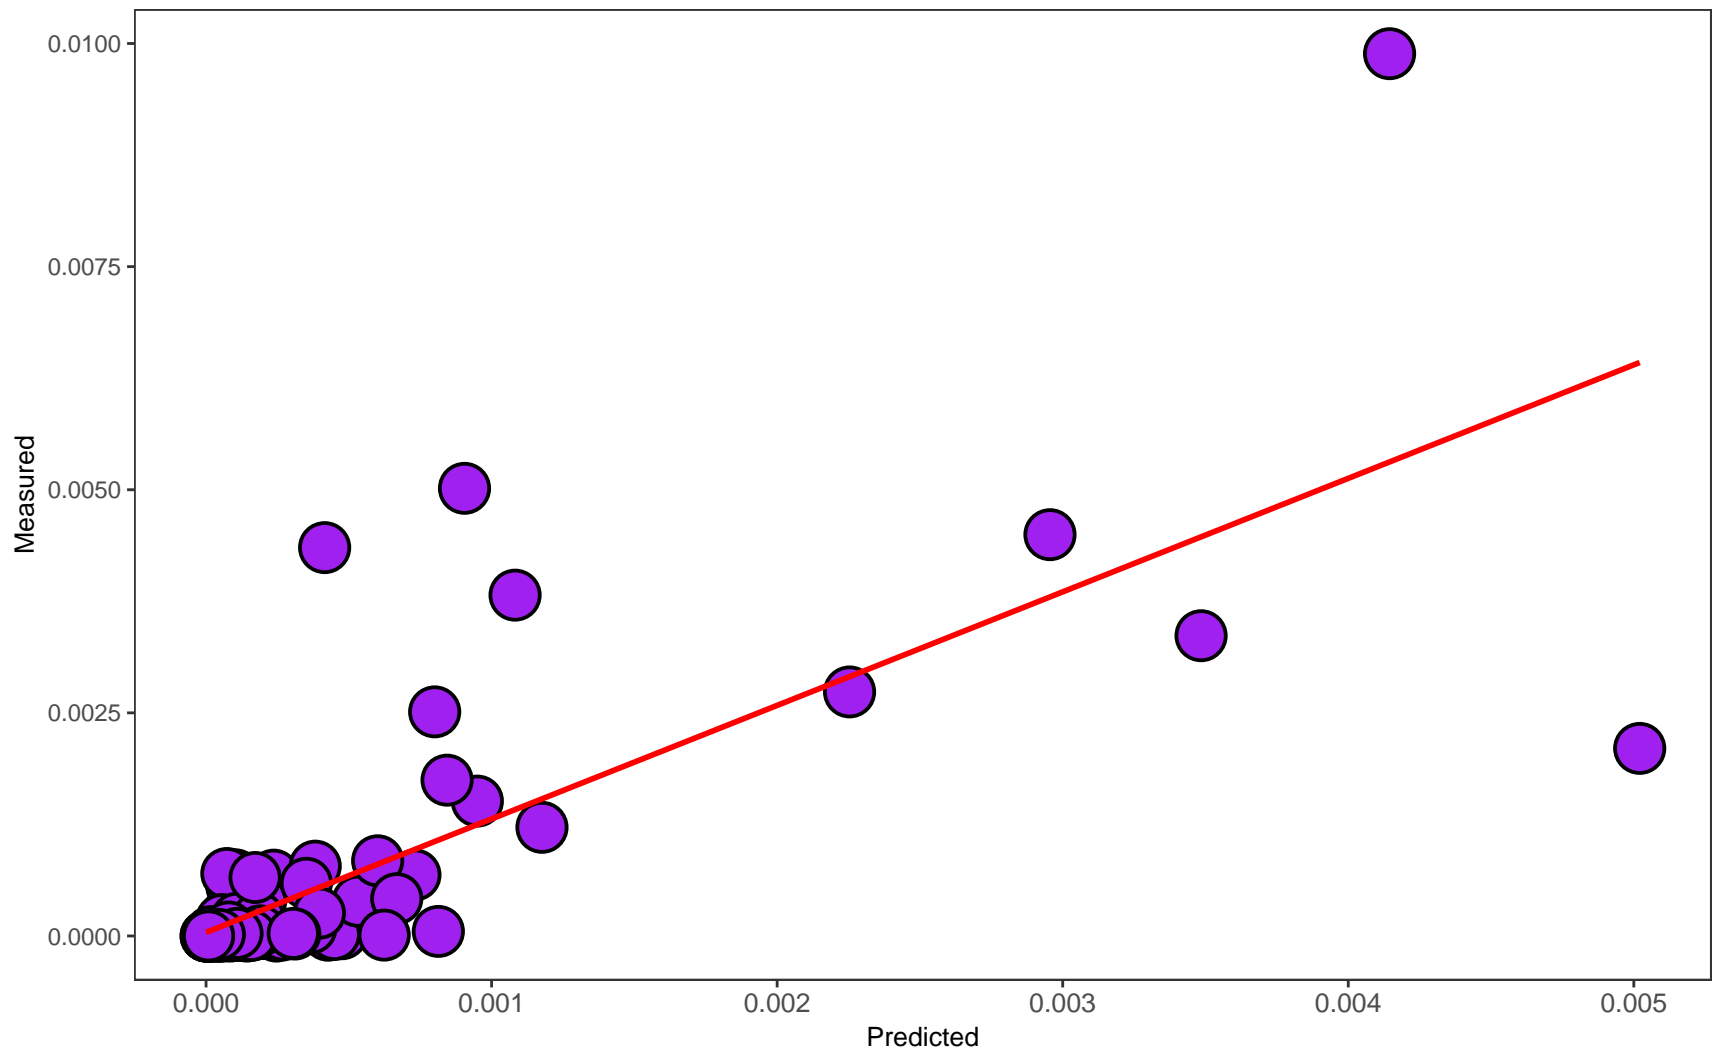

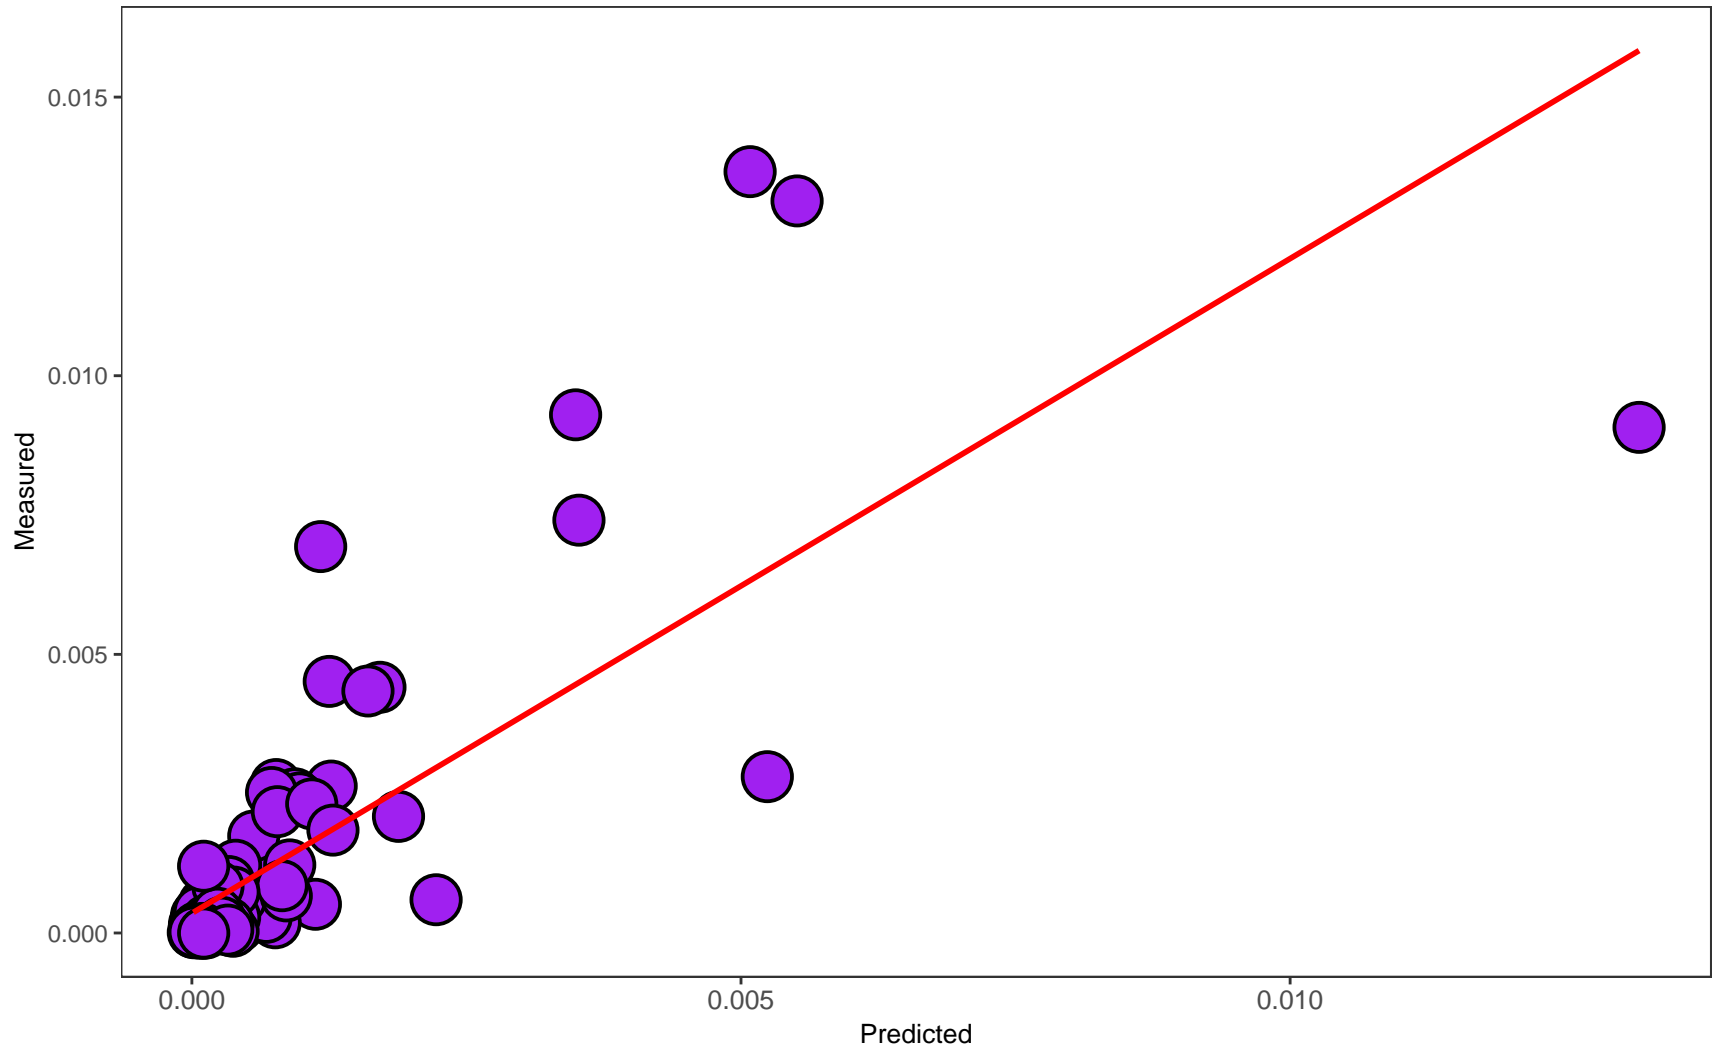

UMCGIBD00529\_UC: Spearman 0.73

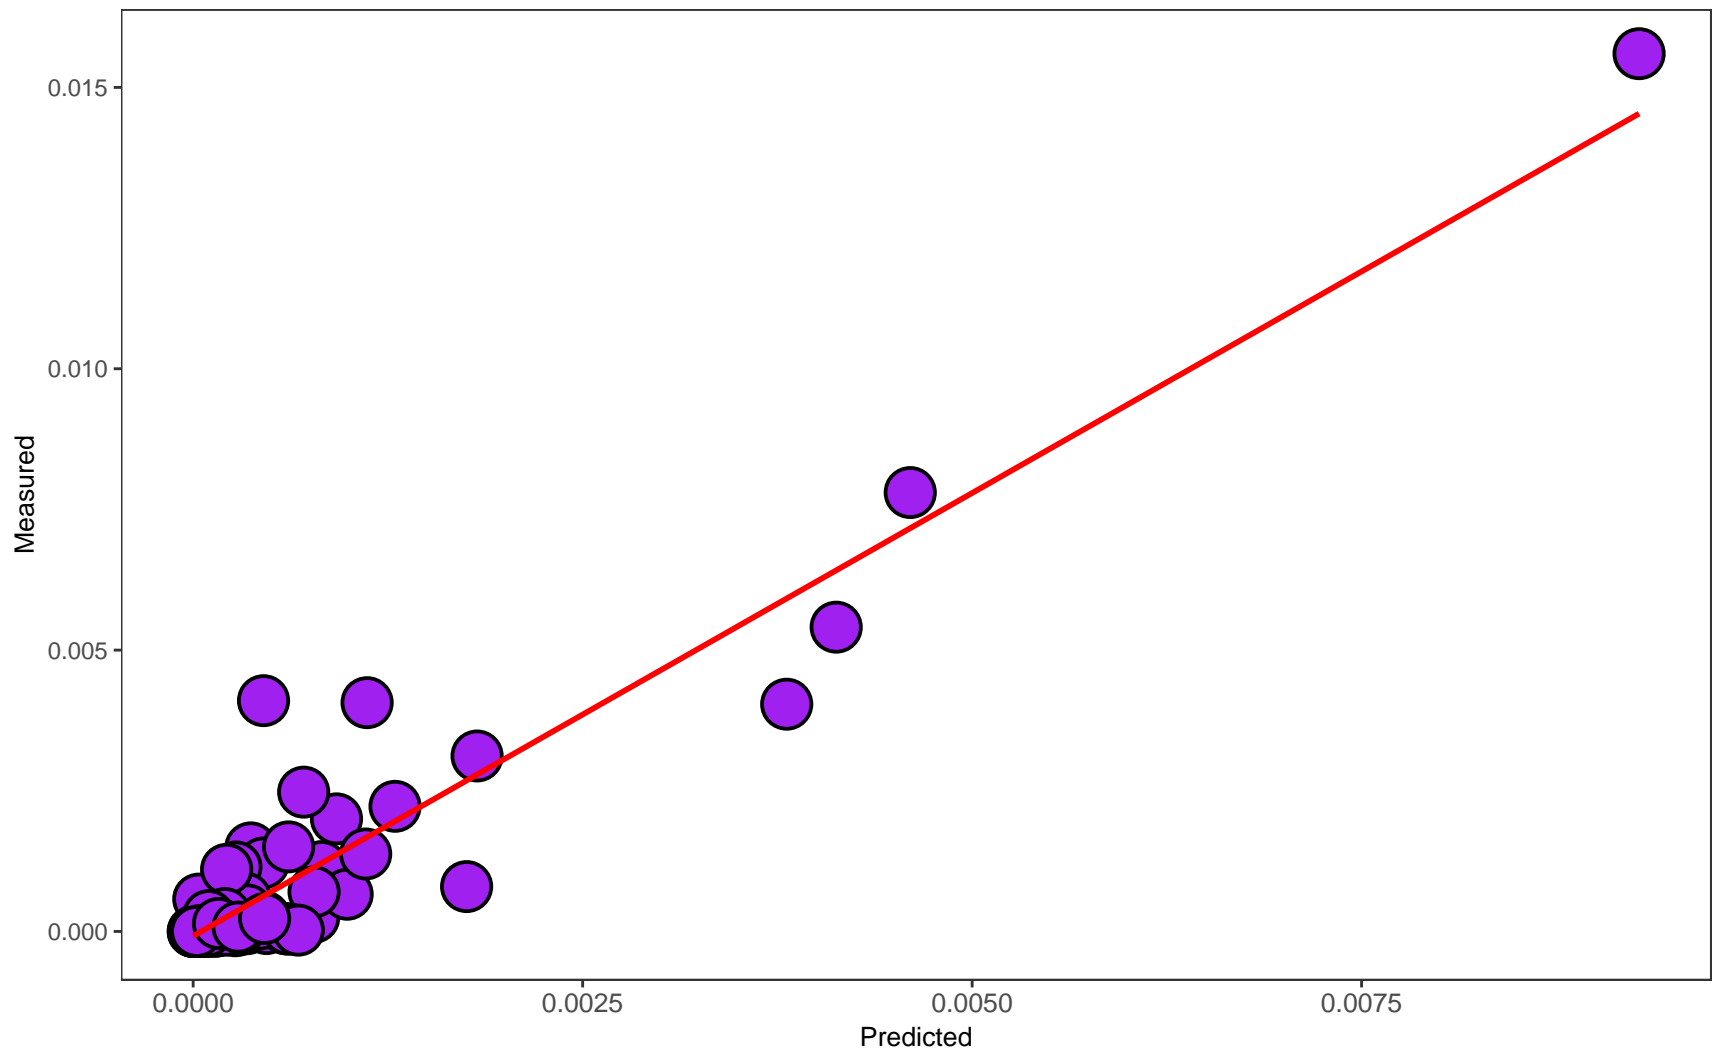

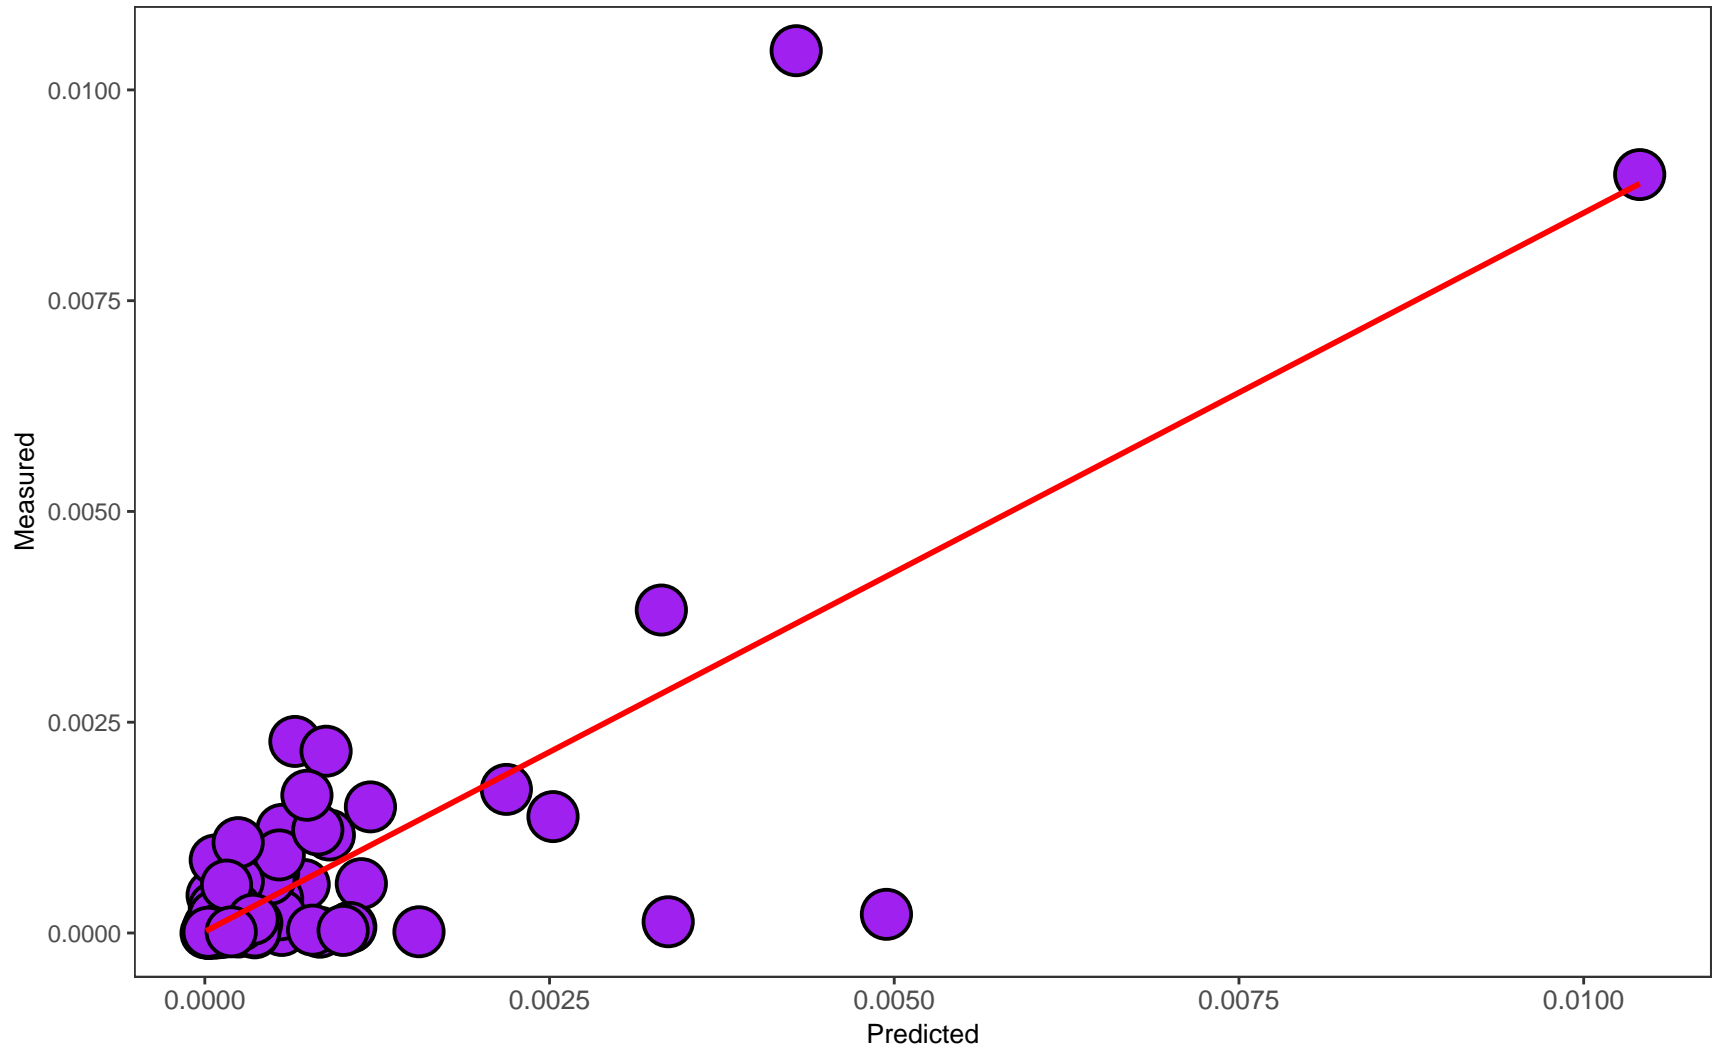

UMCGIBD00145\_CD: Spearman 0.75

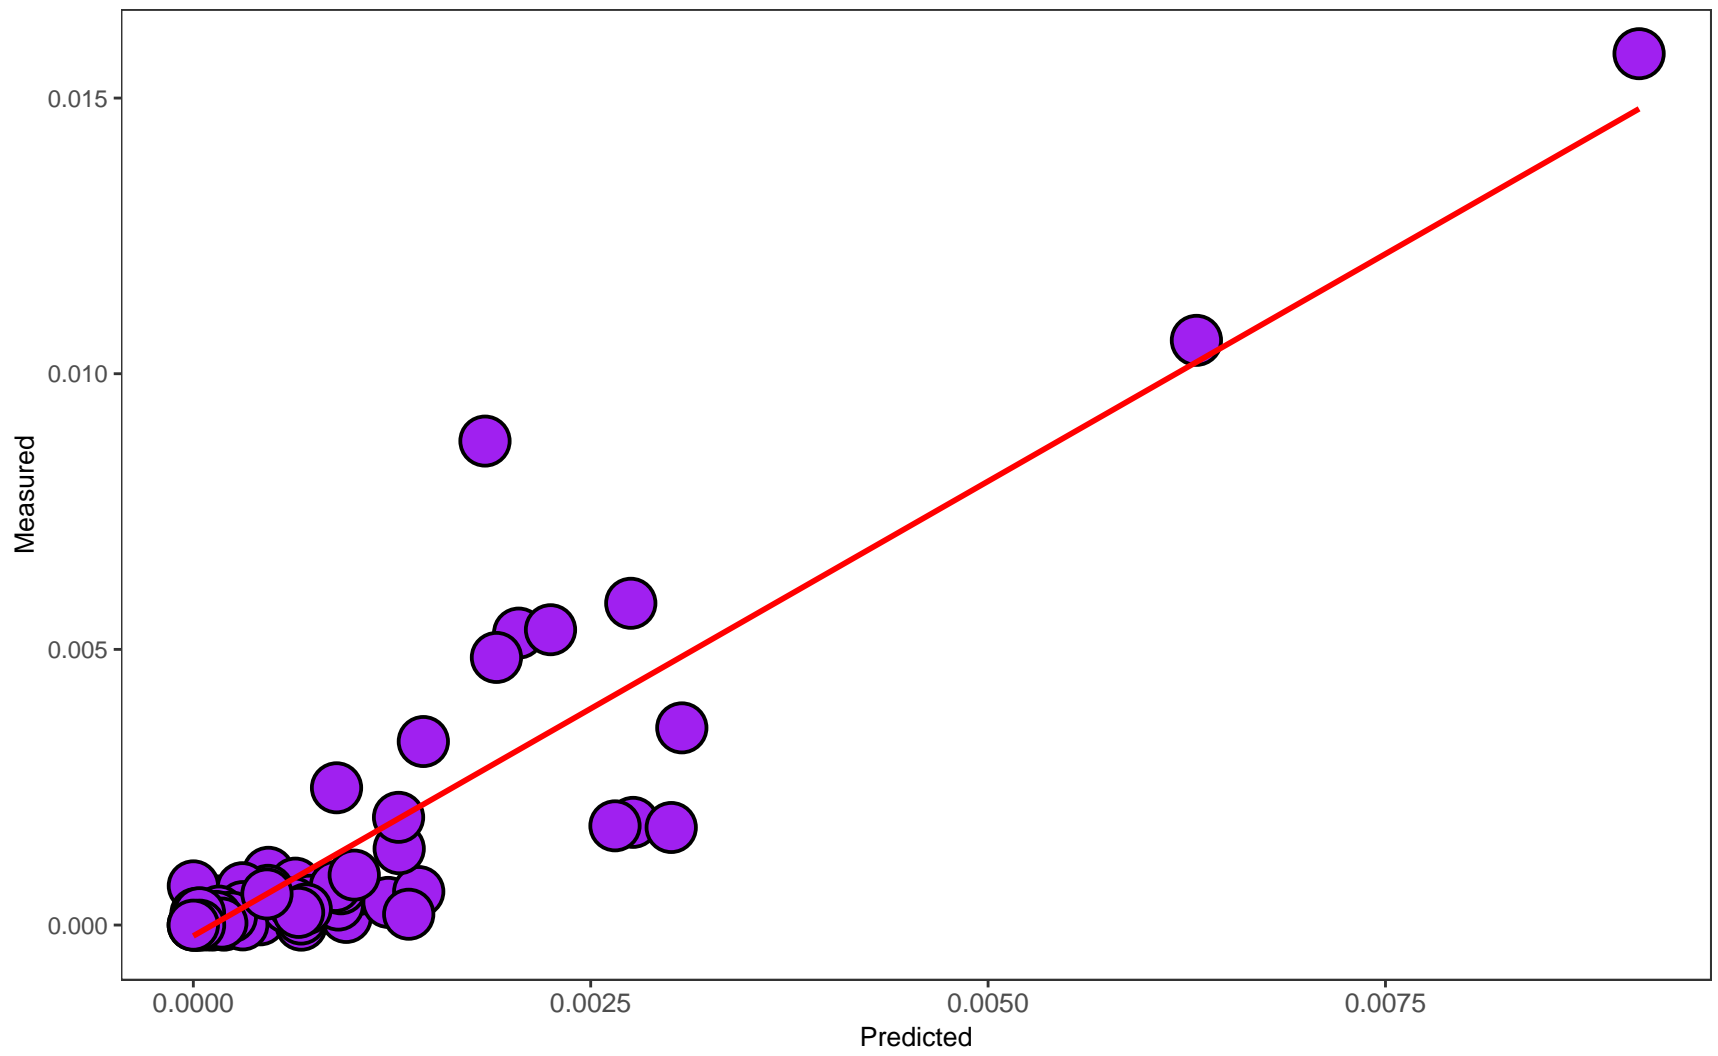

UMCGIBD00613\_UC: Spearman 0.55

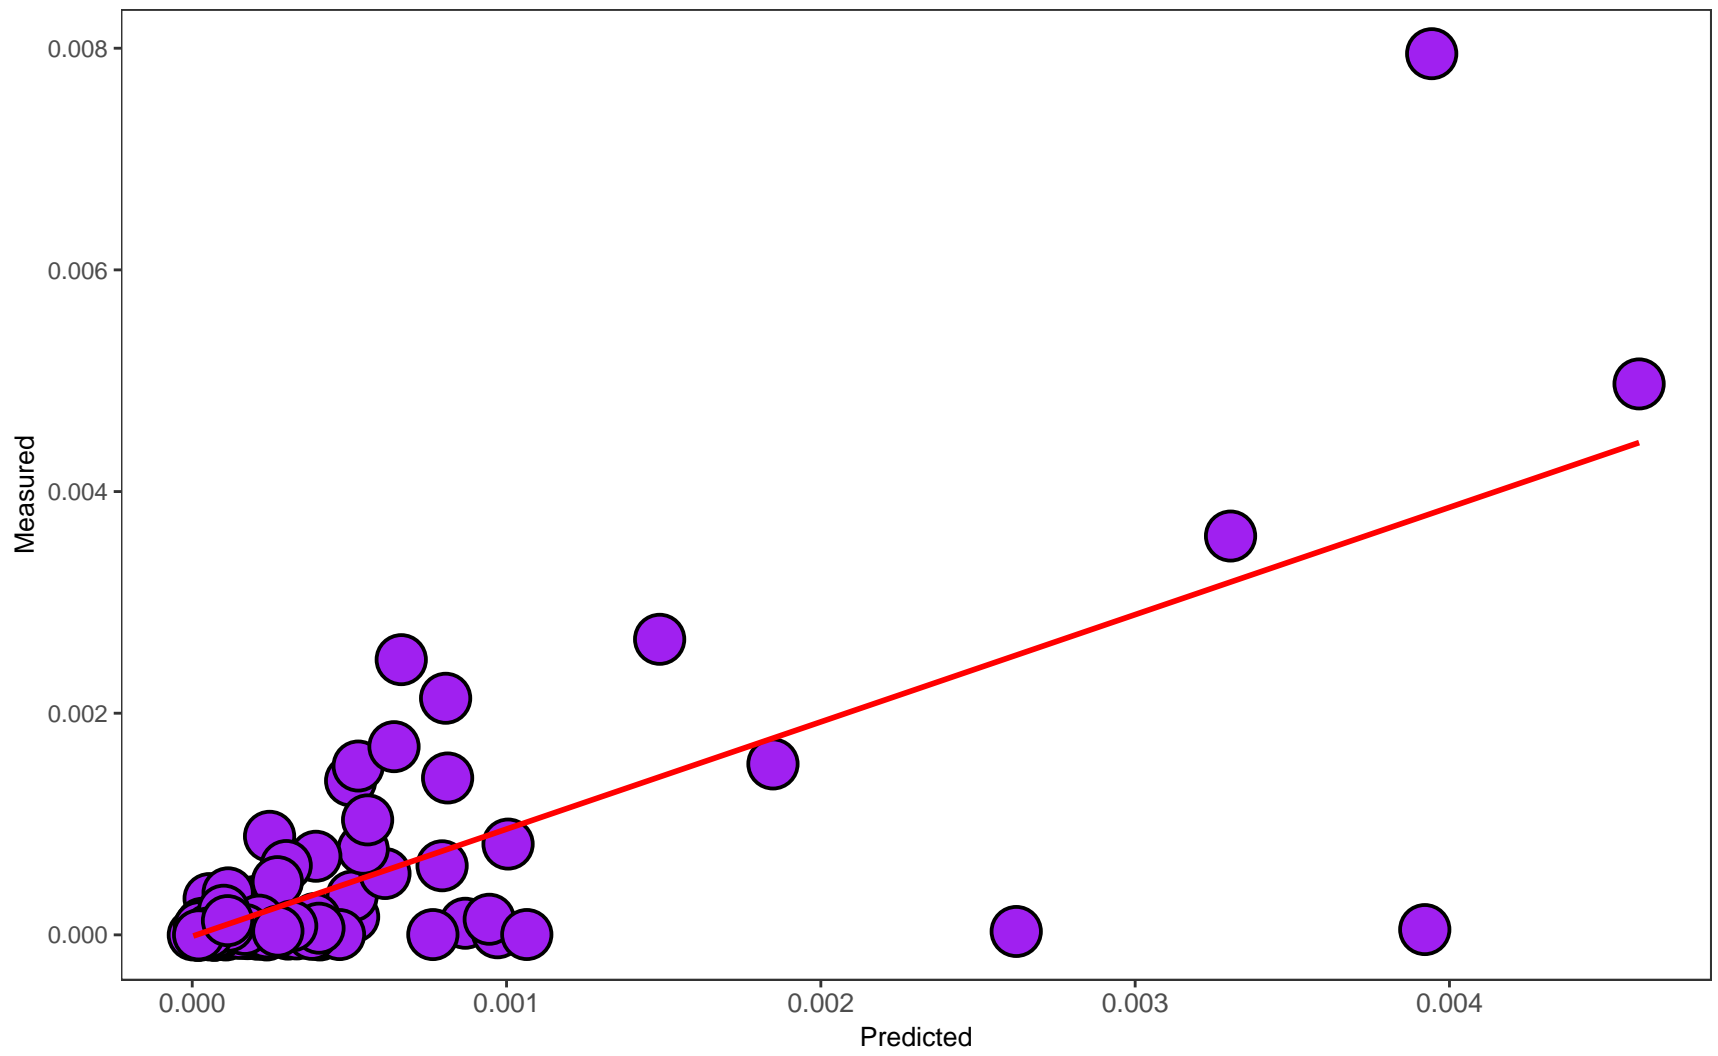





UMCGIBD00053\_UC: Spearman 0.49

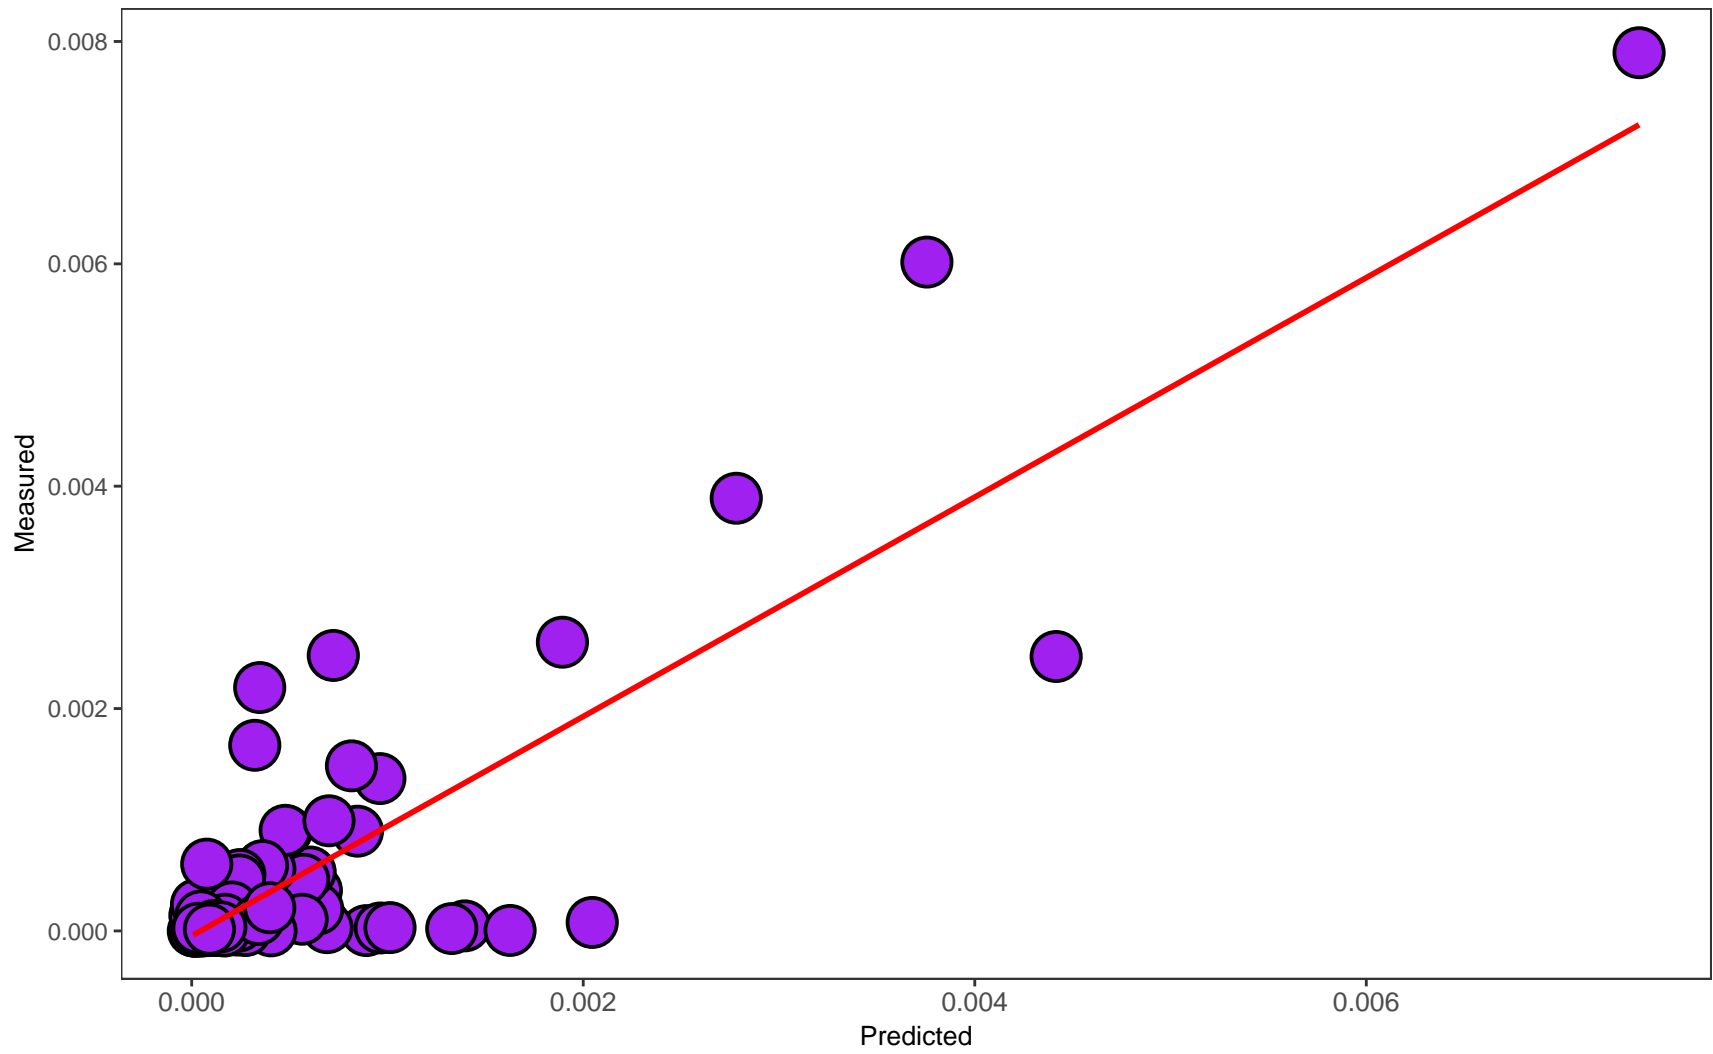

UMCGIBD00269\_UC: Spearman 0.69

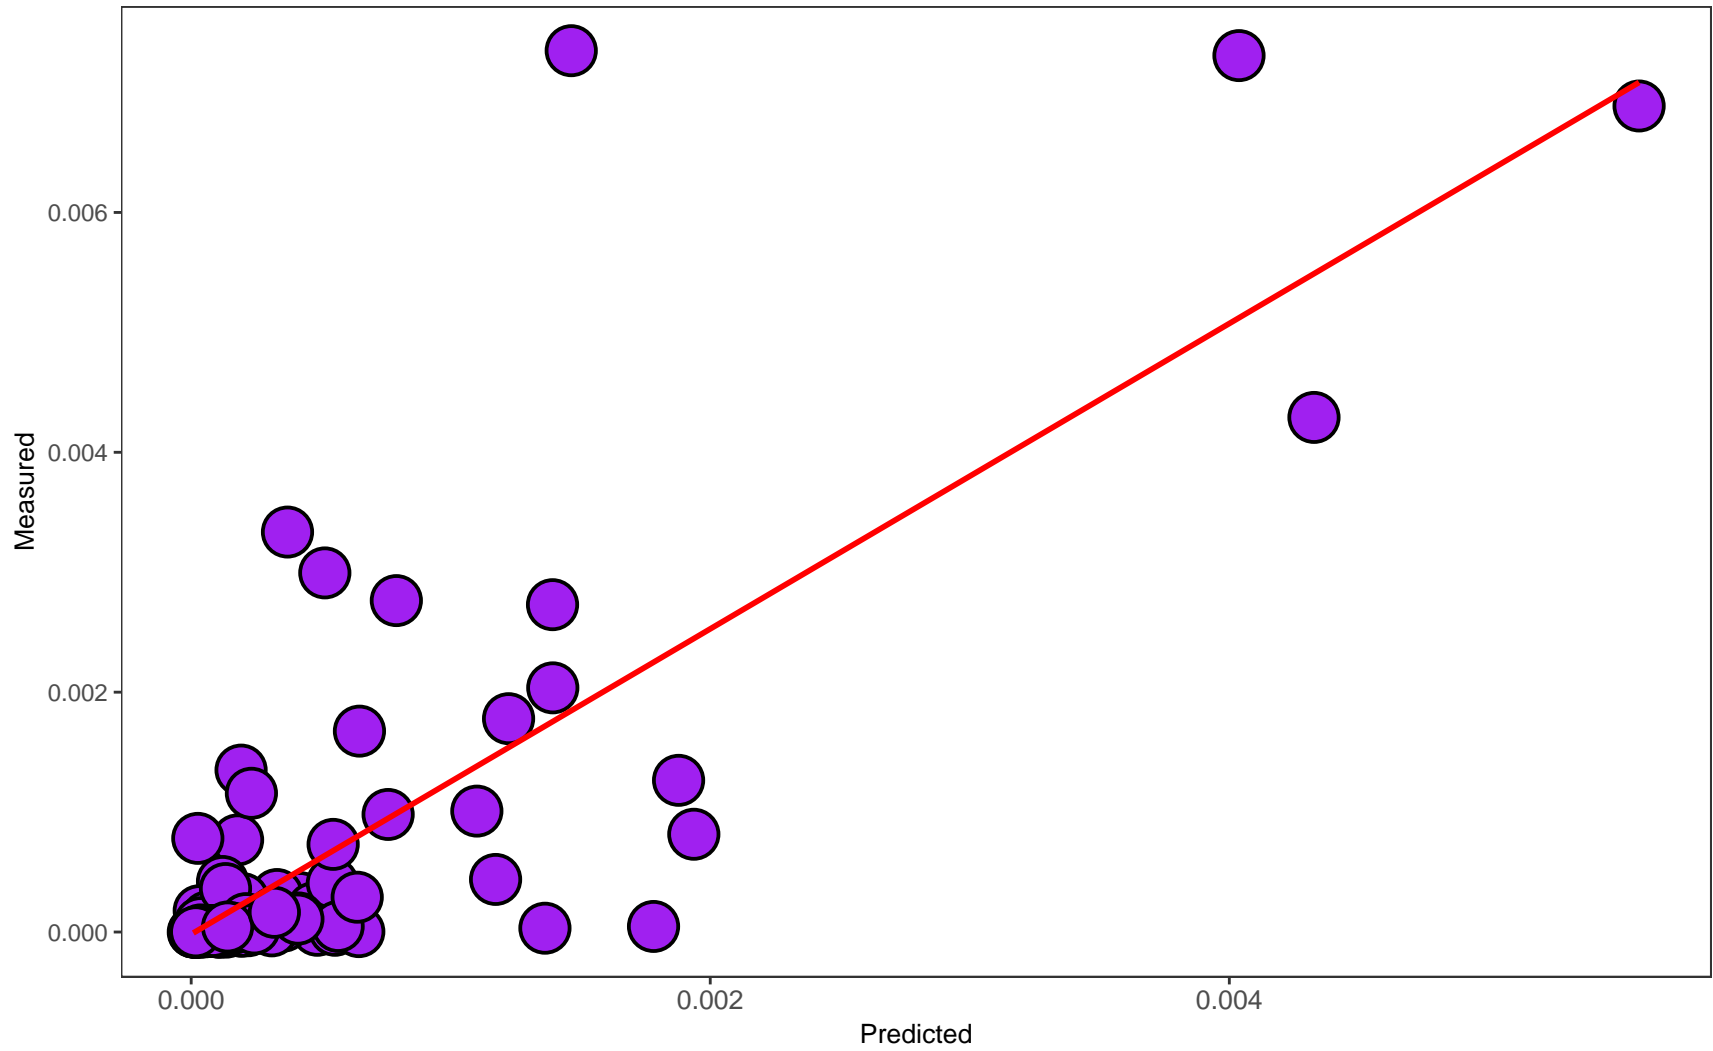

UMCGIBD00250\_UC: Spearman 0.64

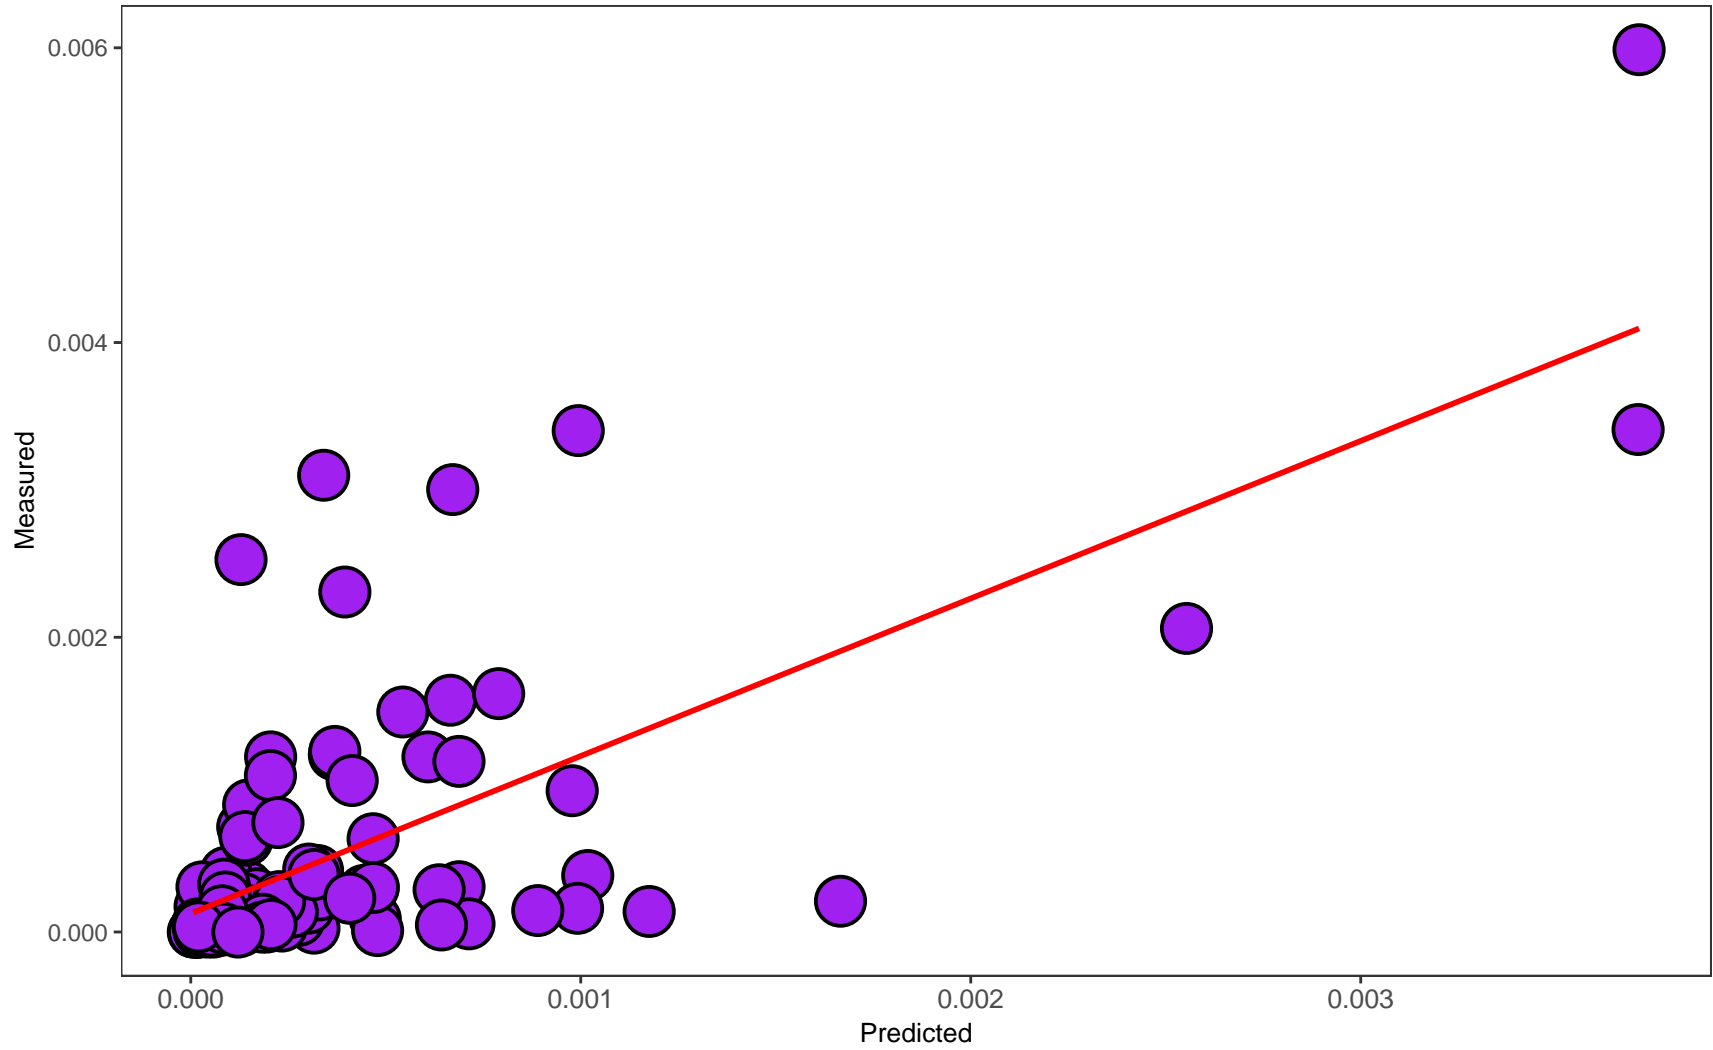

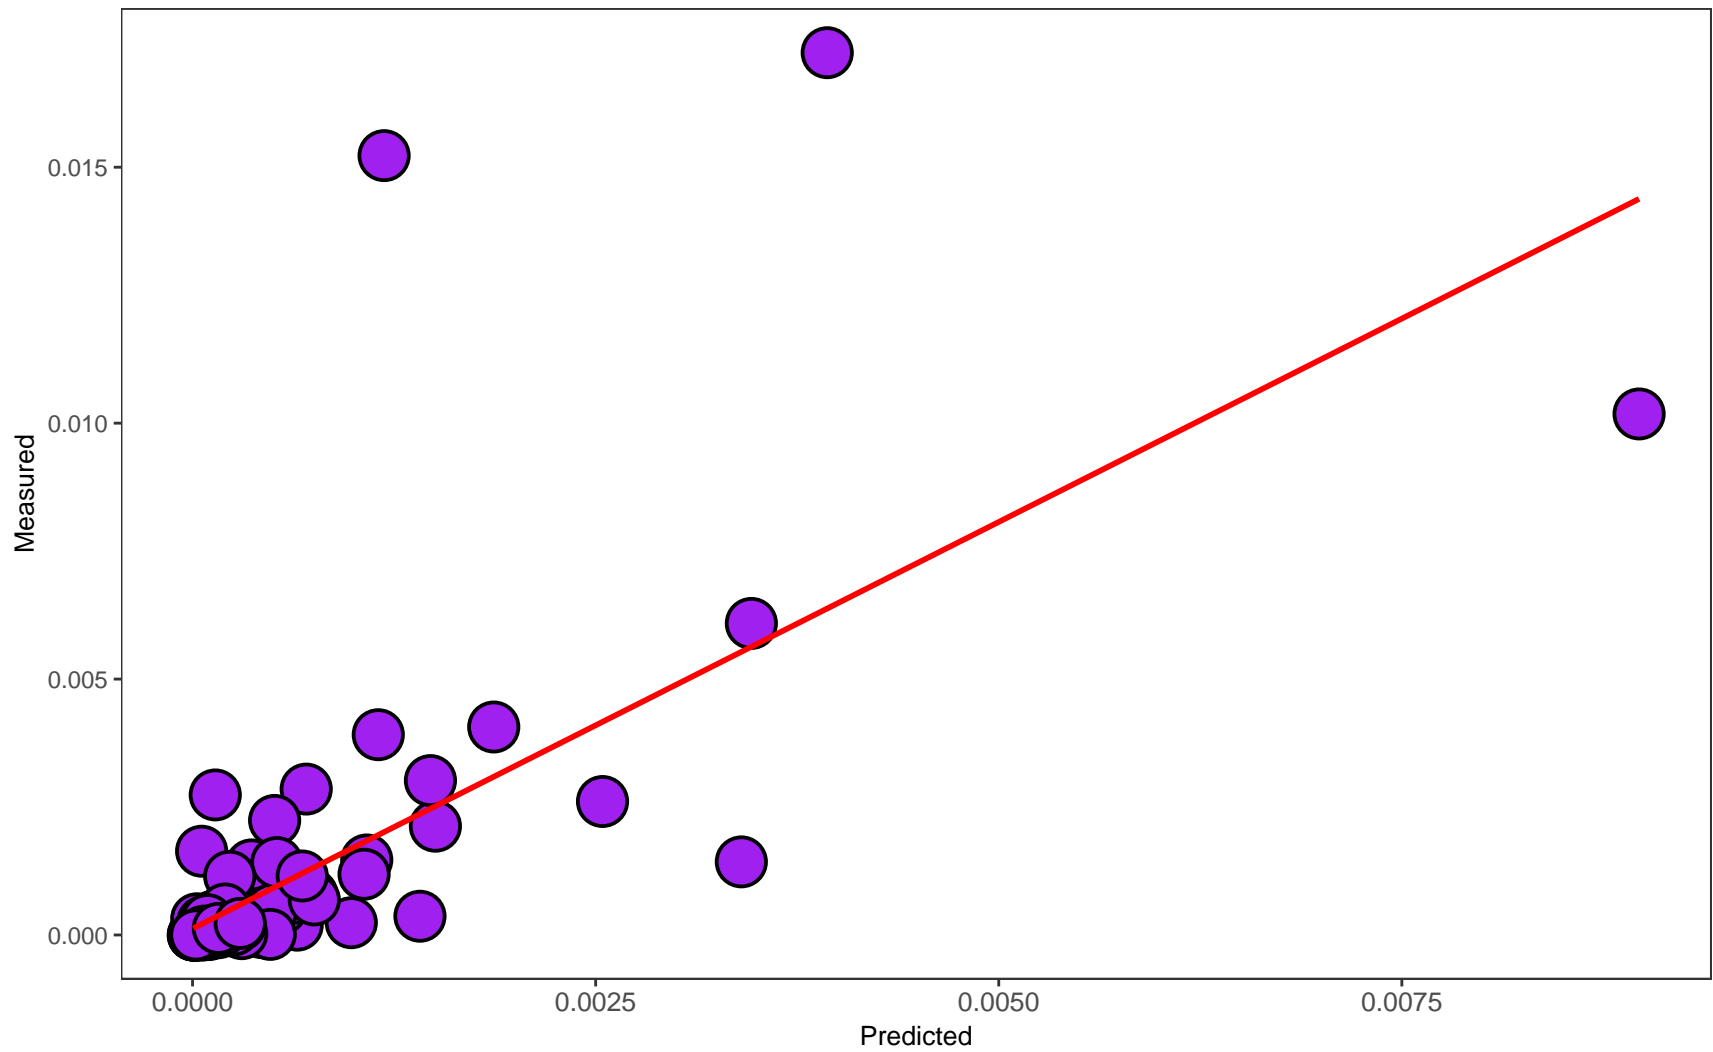



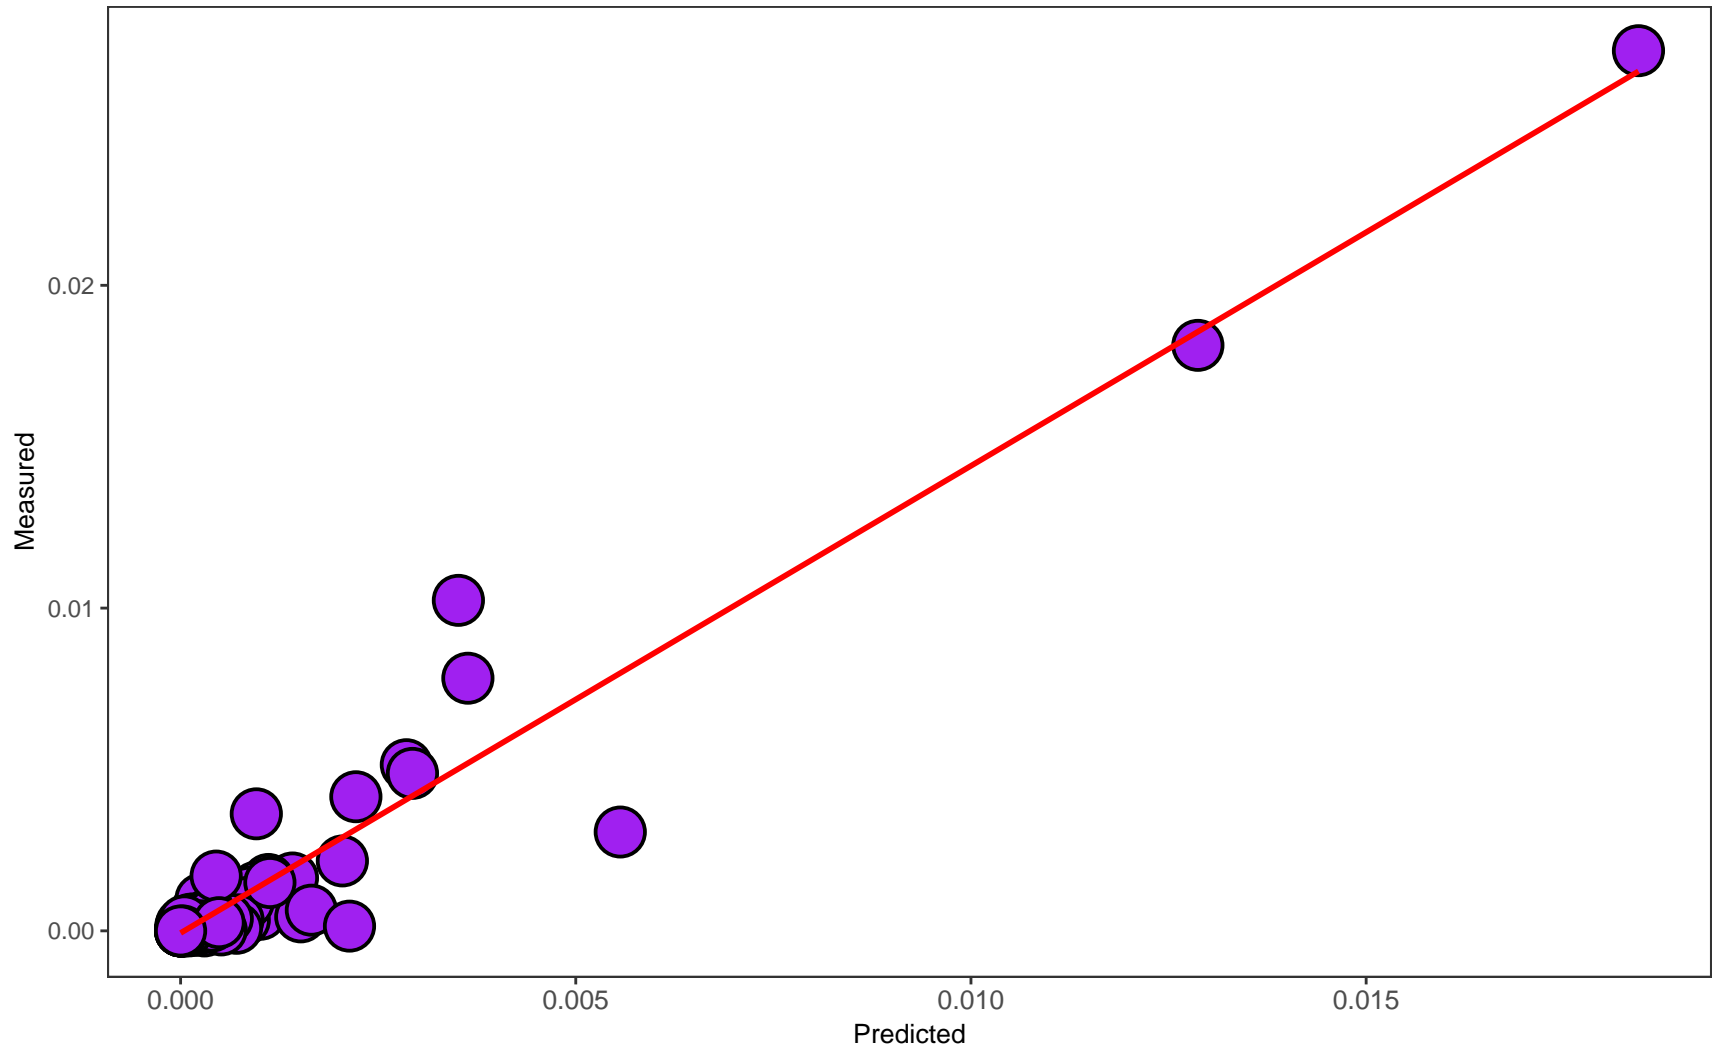

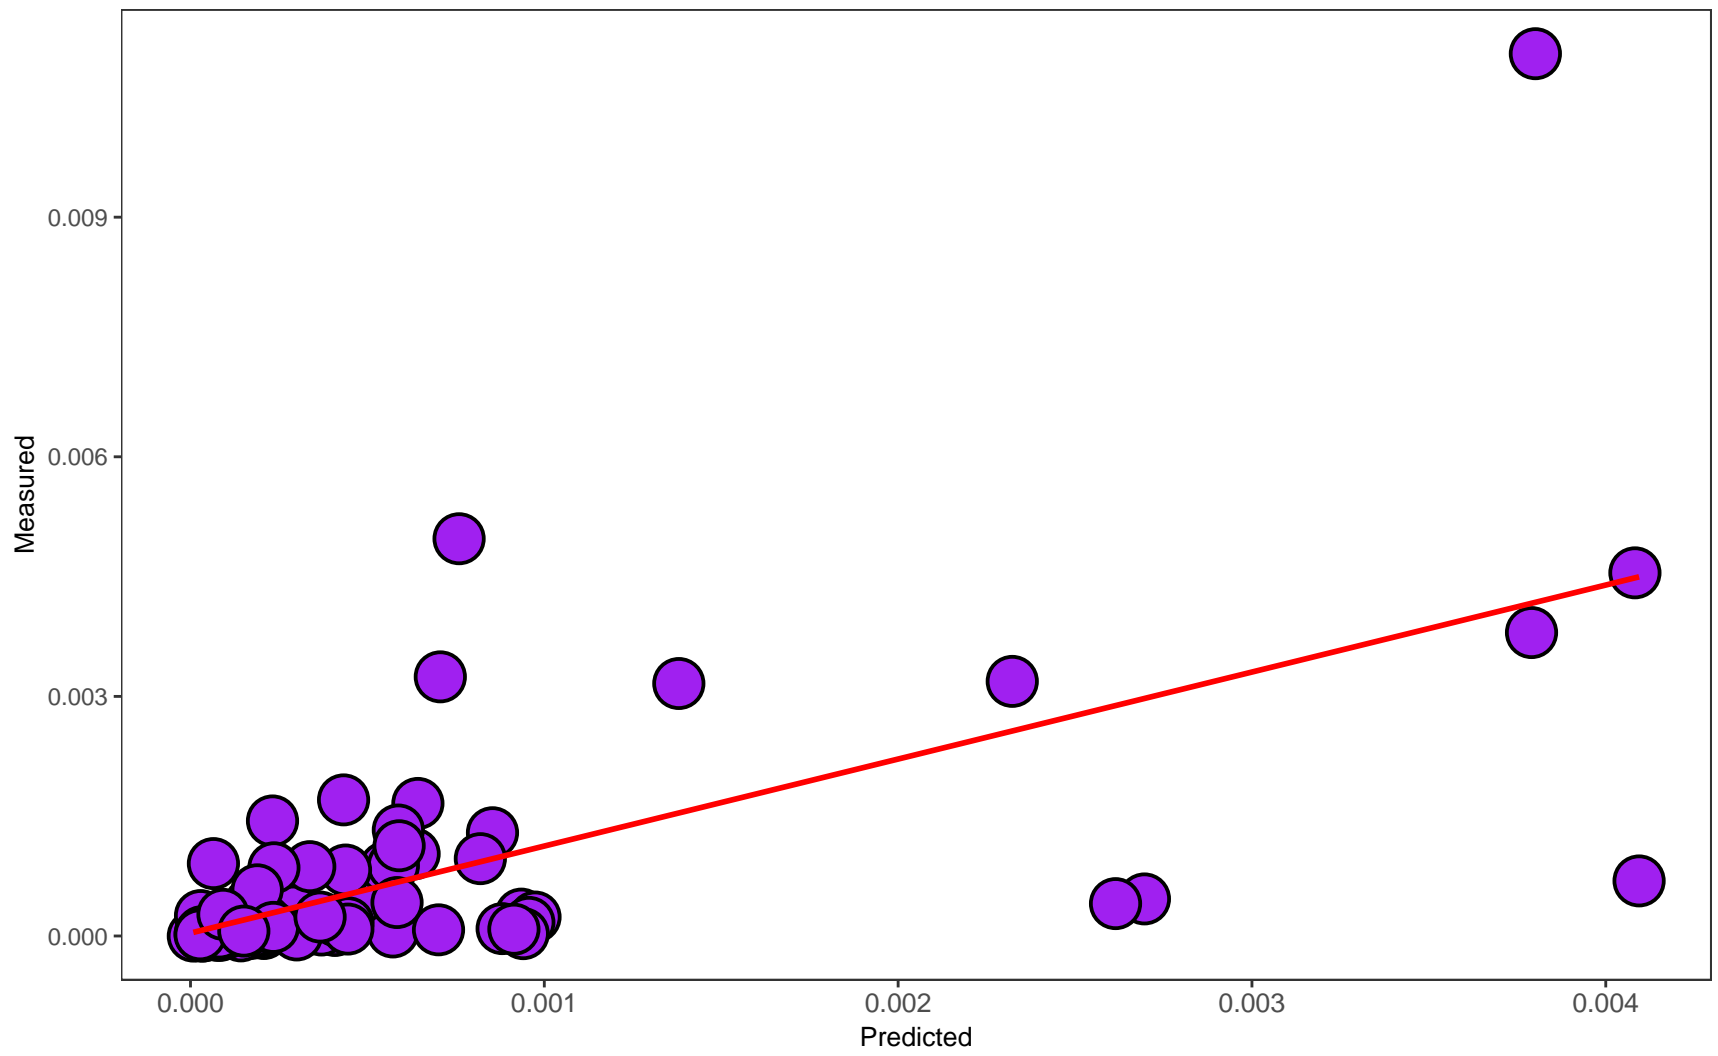



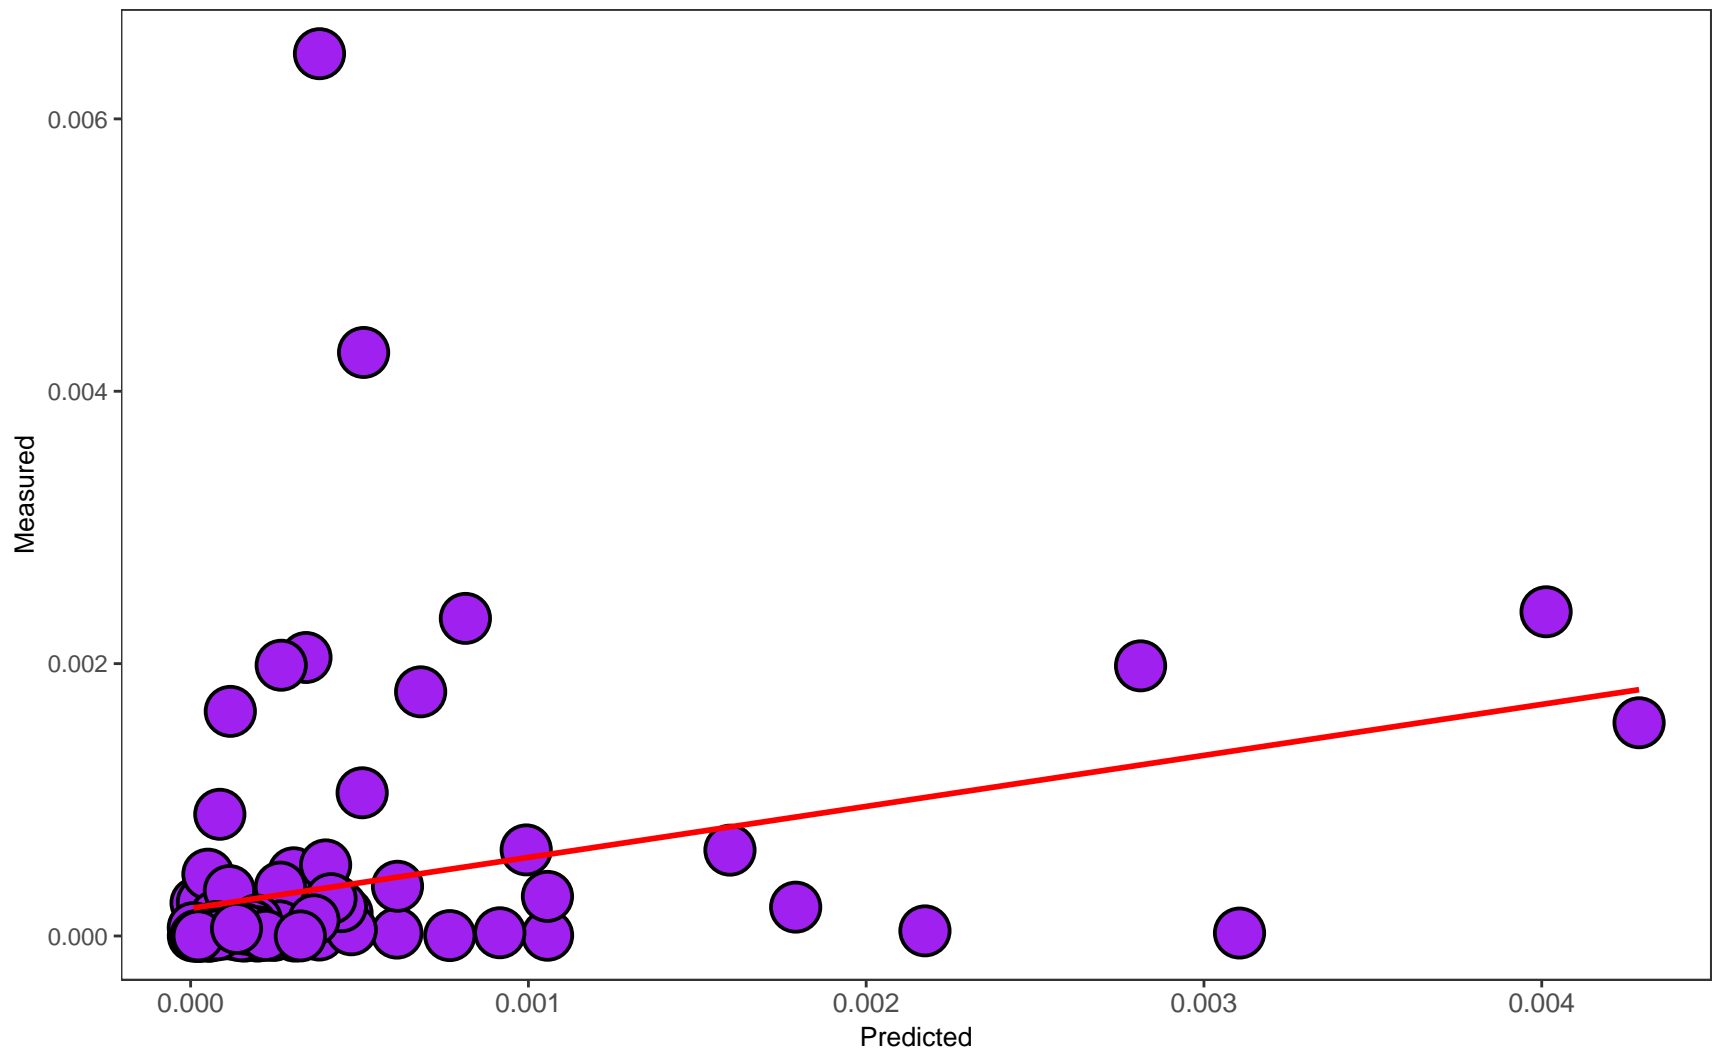

UMCGIBD00645\_UC: Spearman 0.78

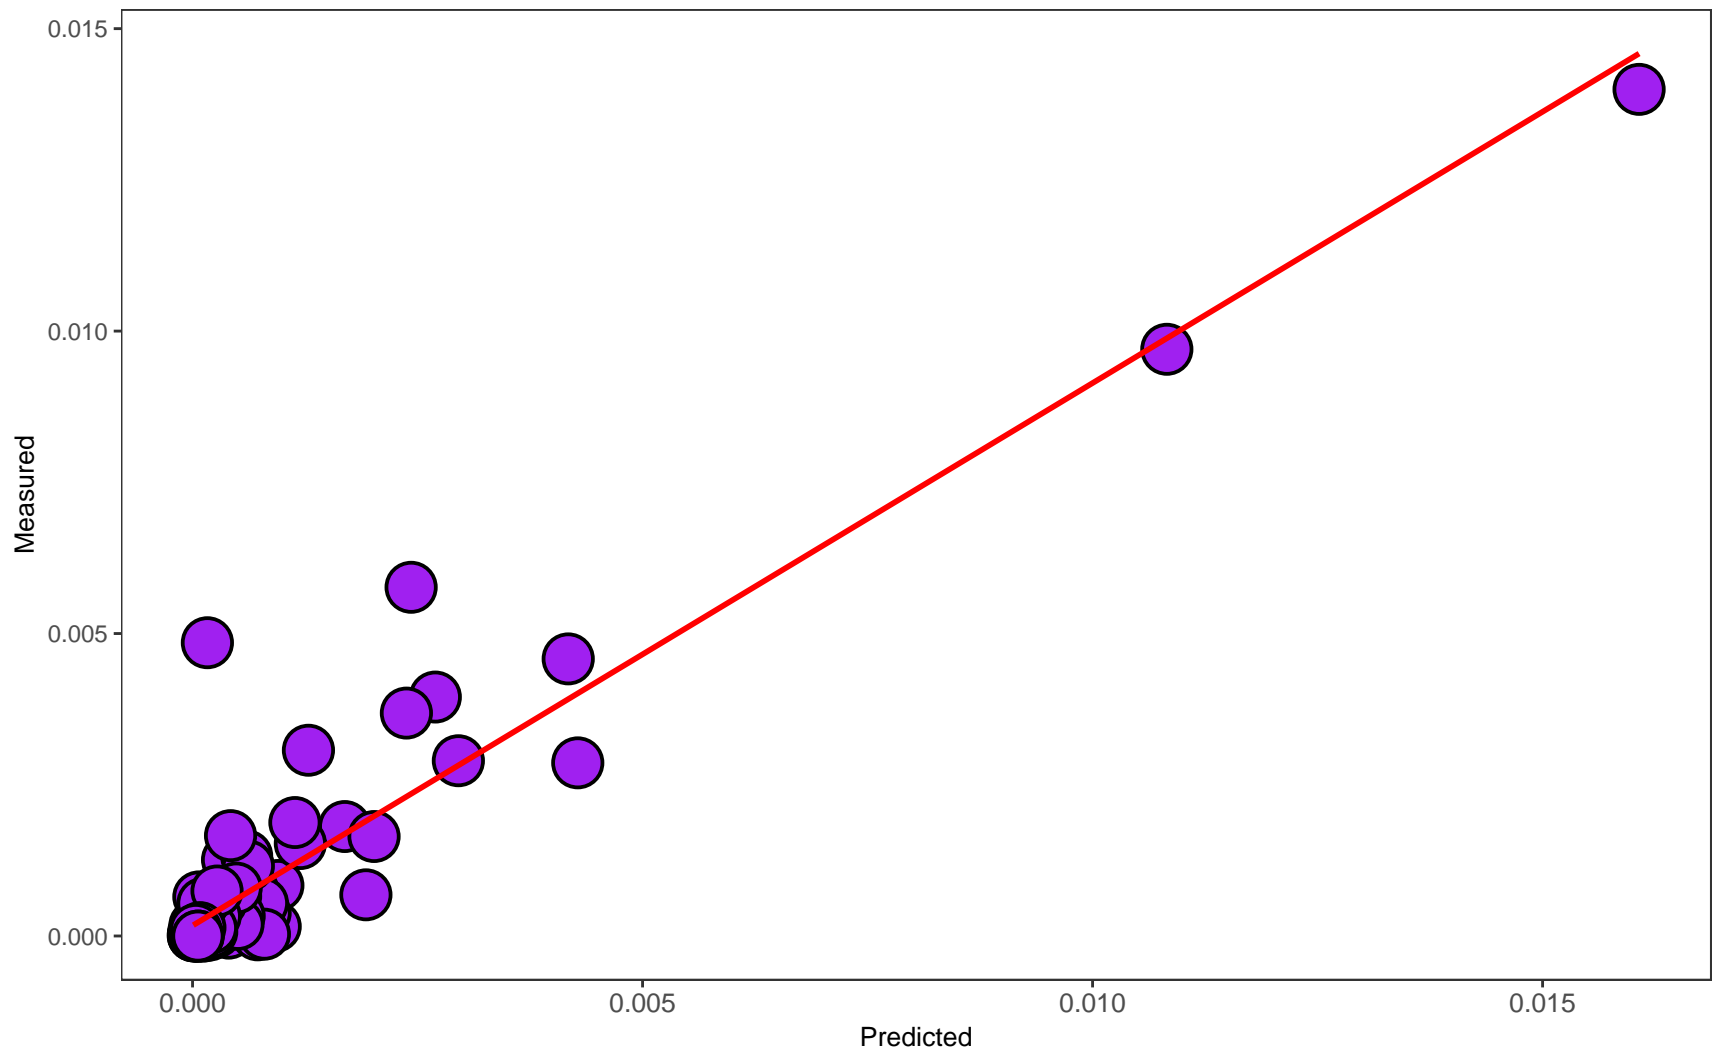

UMCGIBD00361\_UC: Spearman 0.57

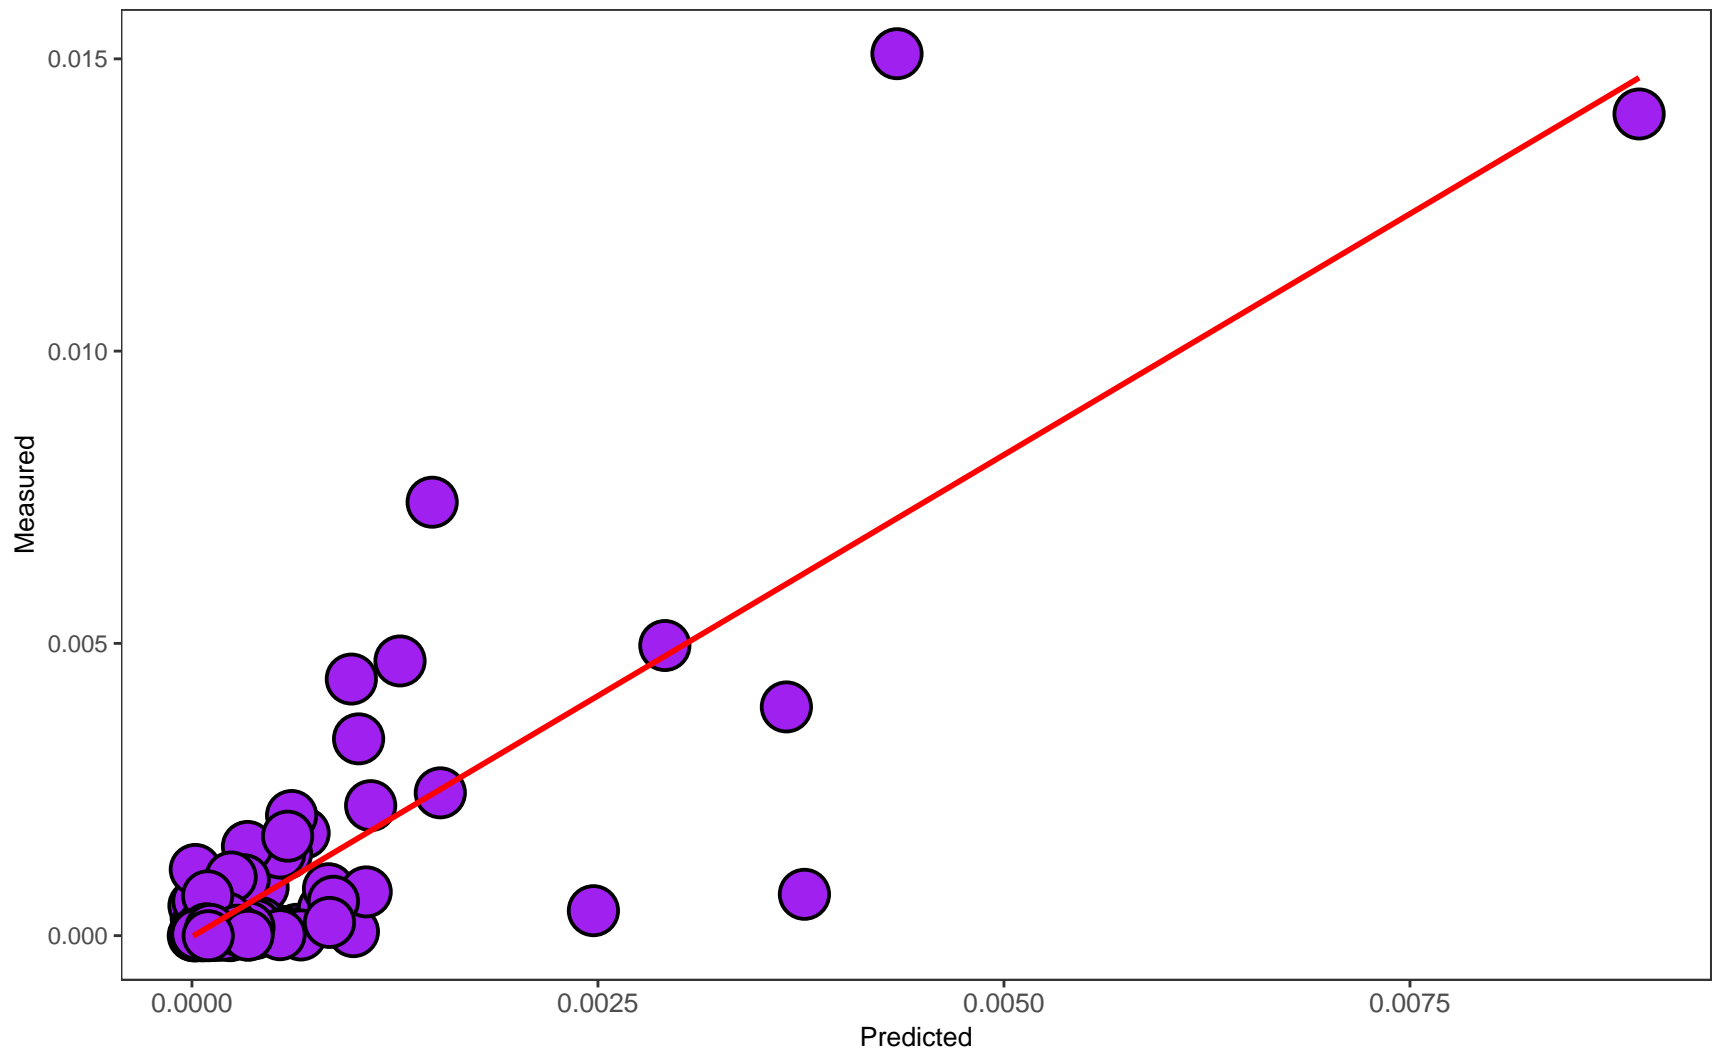

UMCGIBD00485\_CD: Spearman 0.51

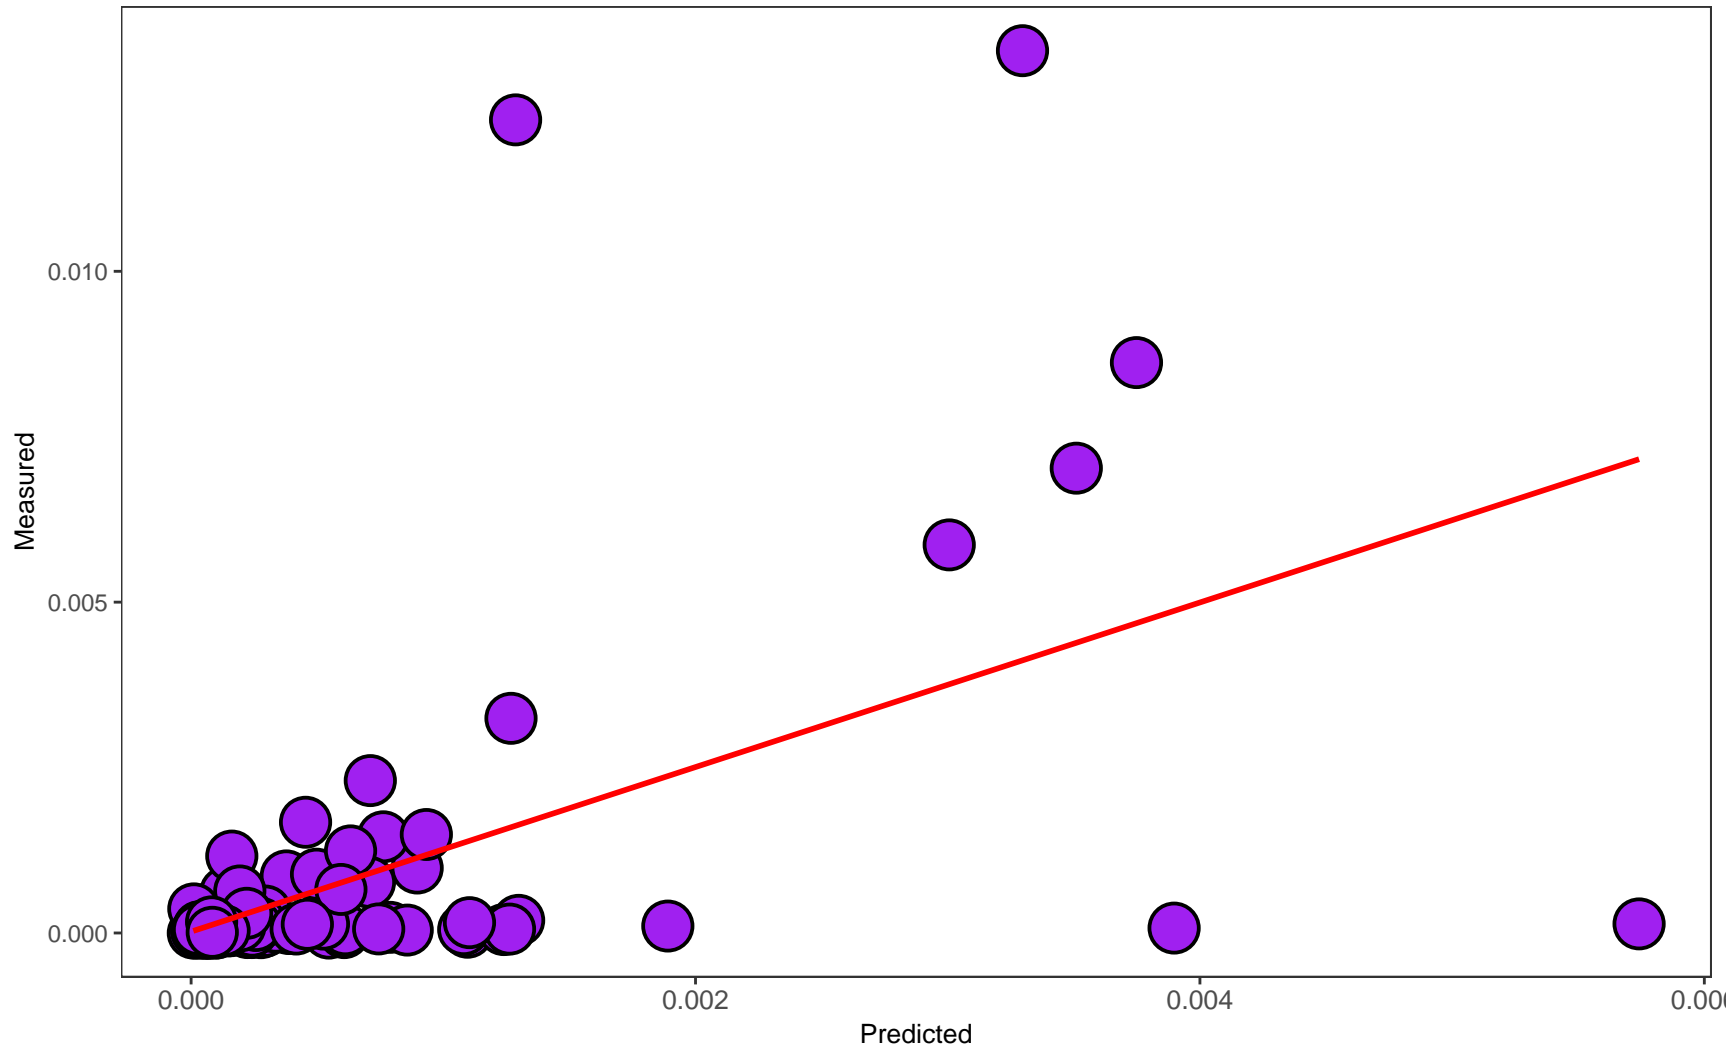

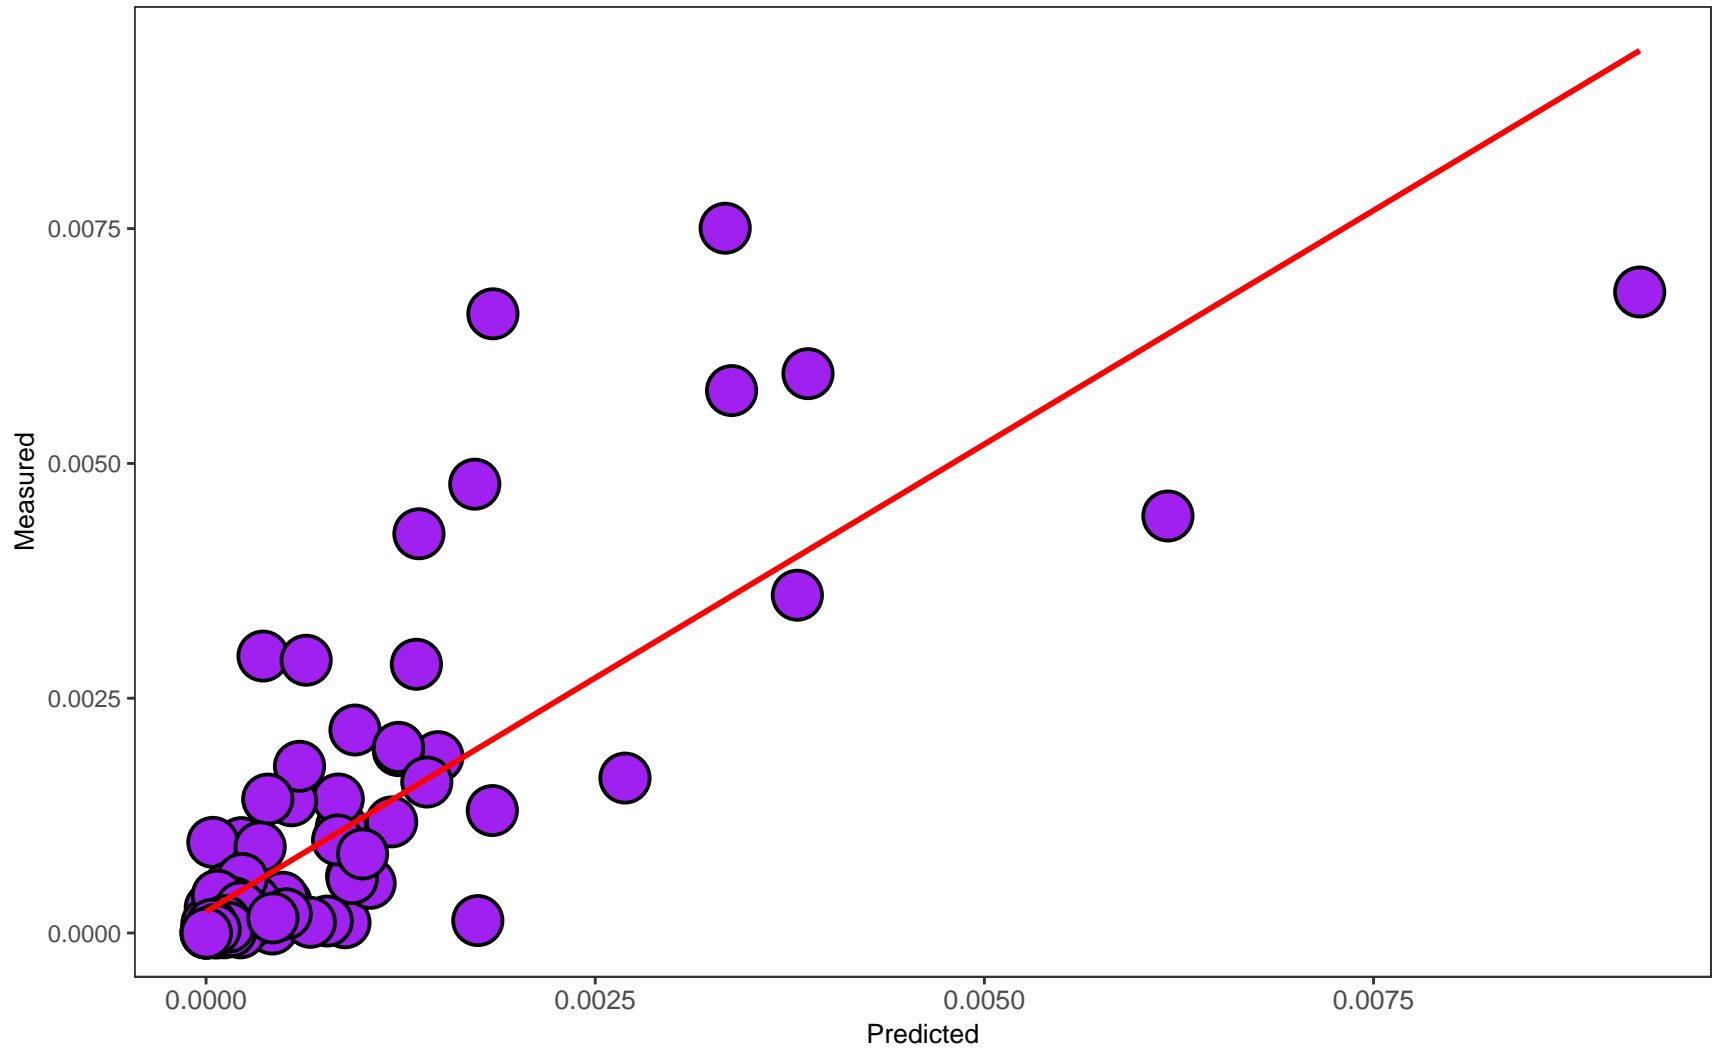

UMCGIBD00126\_CD: Spearman 0.84

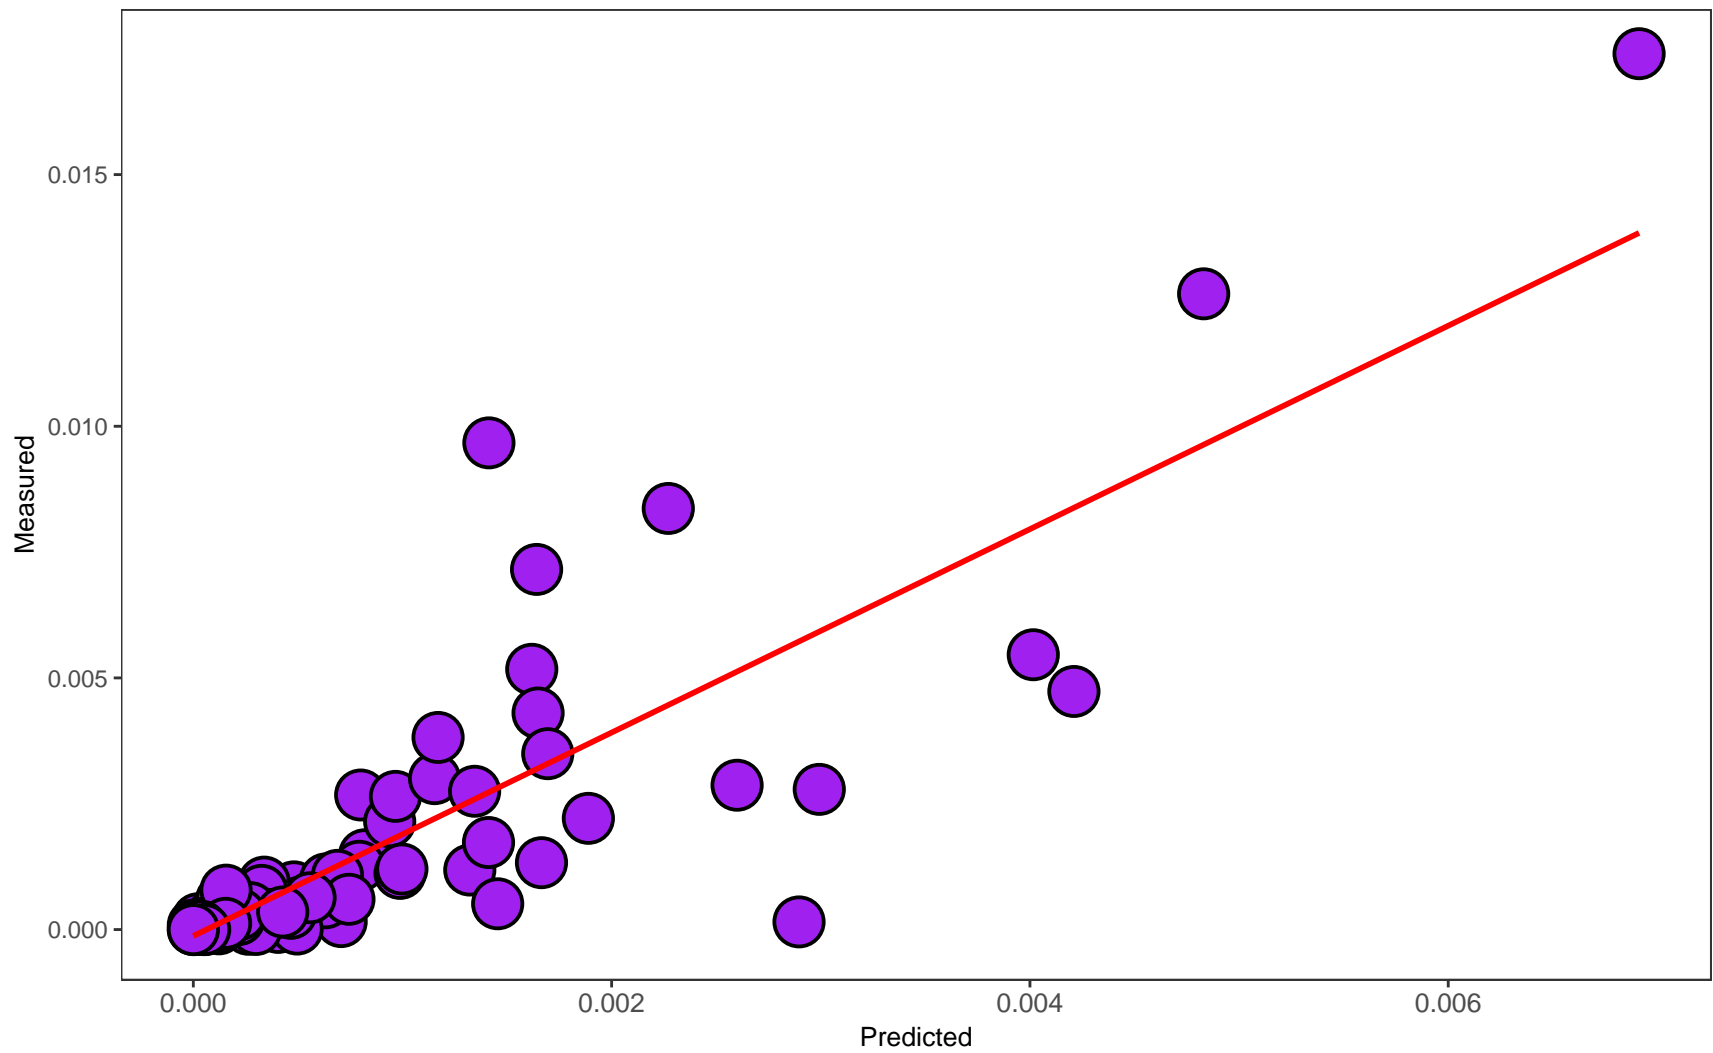

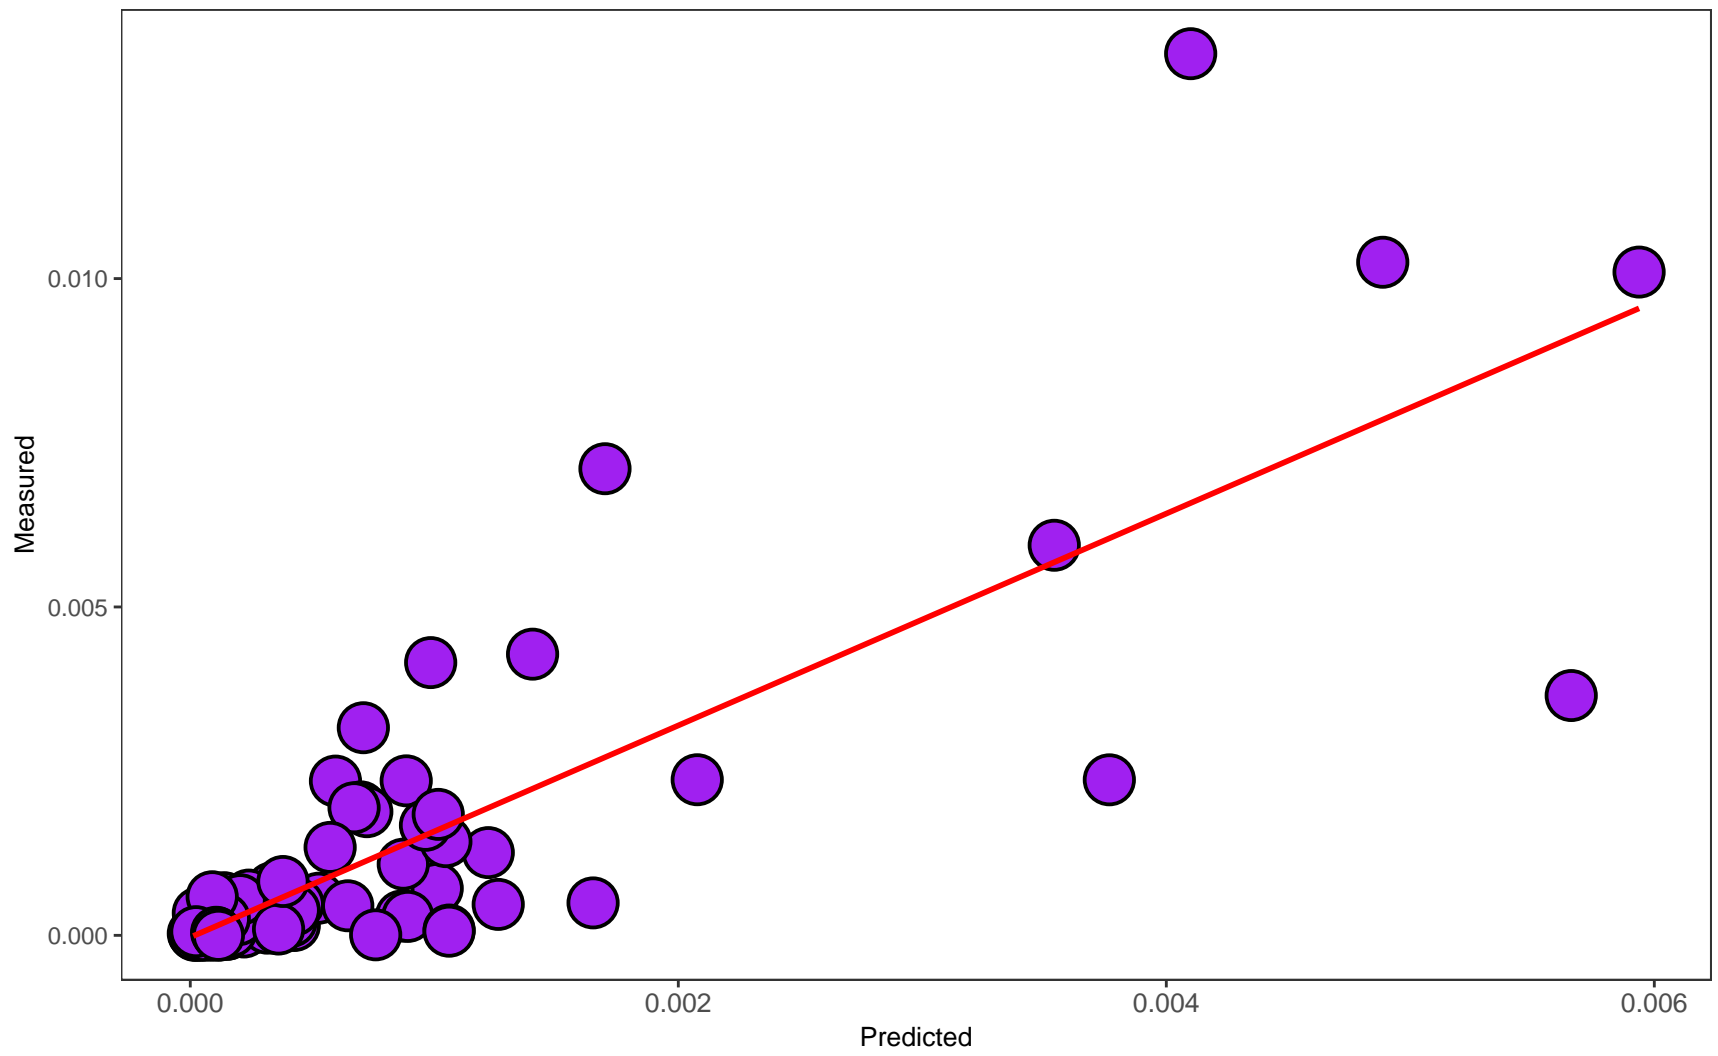

UMCGIBD00442\_CD: Spearman 0.67

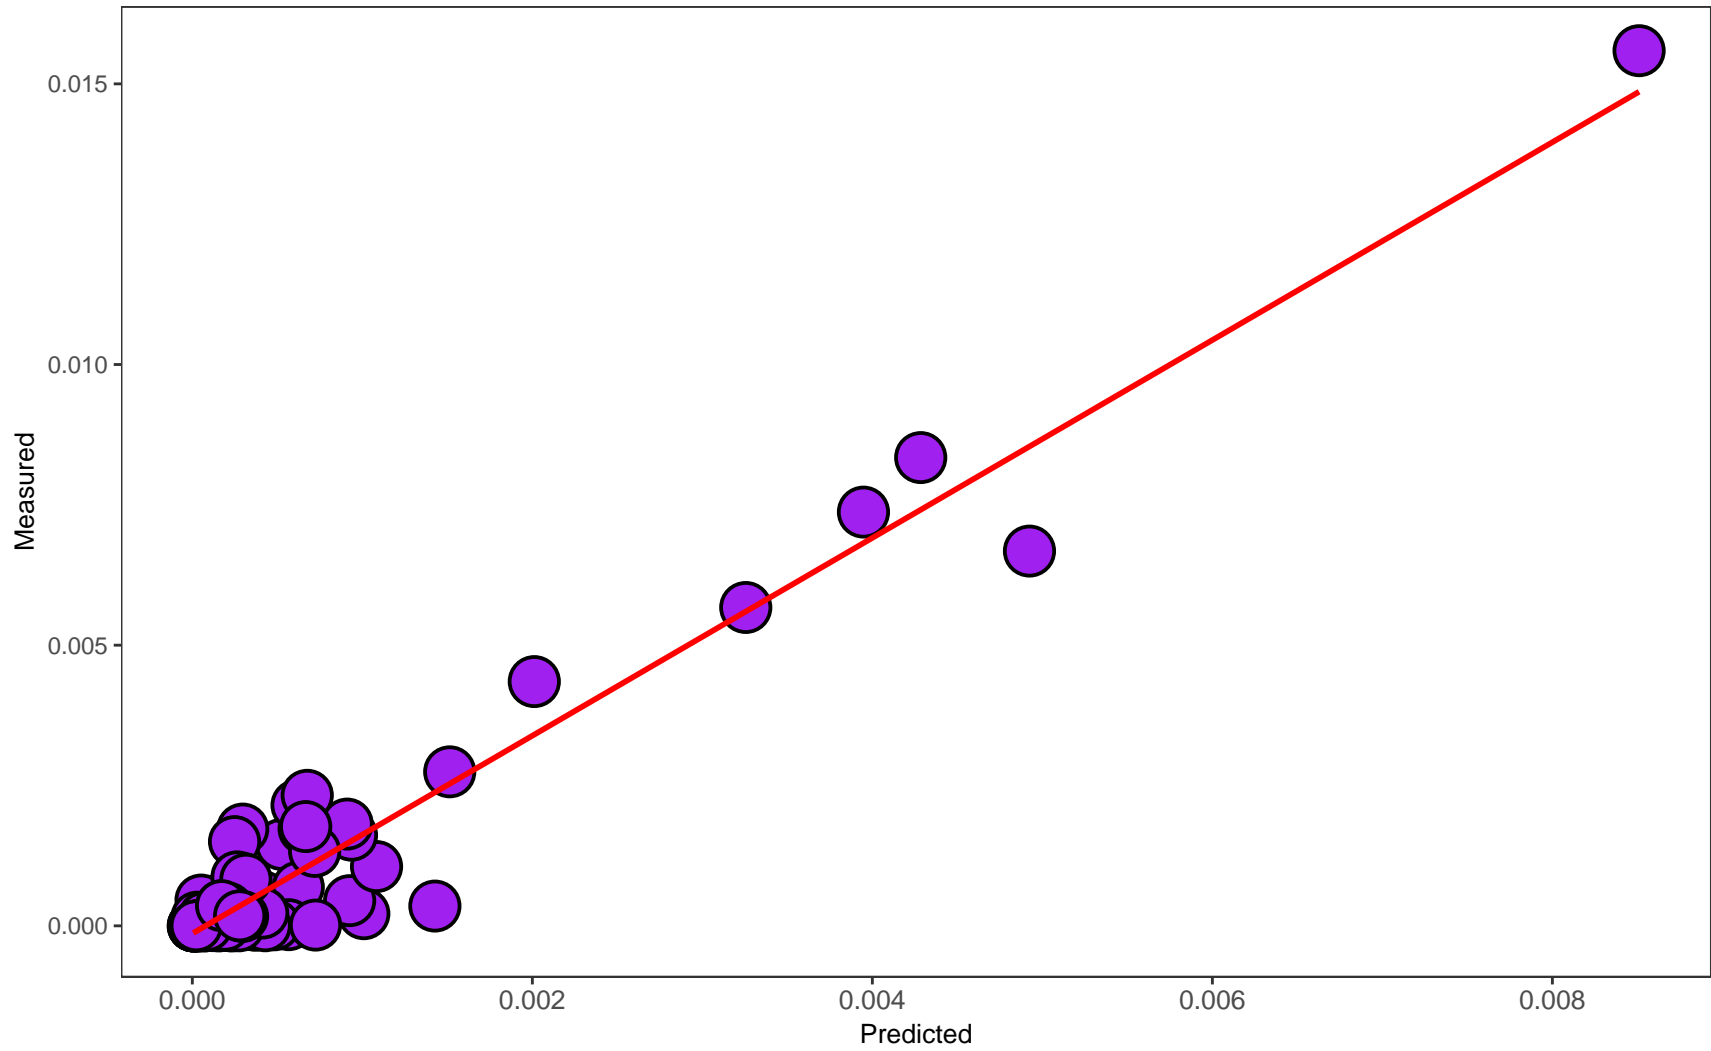



UMCGIBD00412\_UC: Spearman 0.8

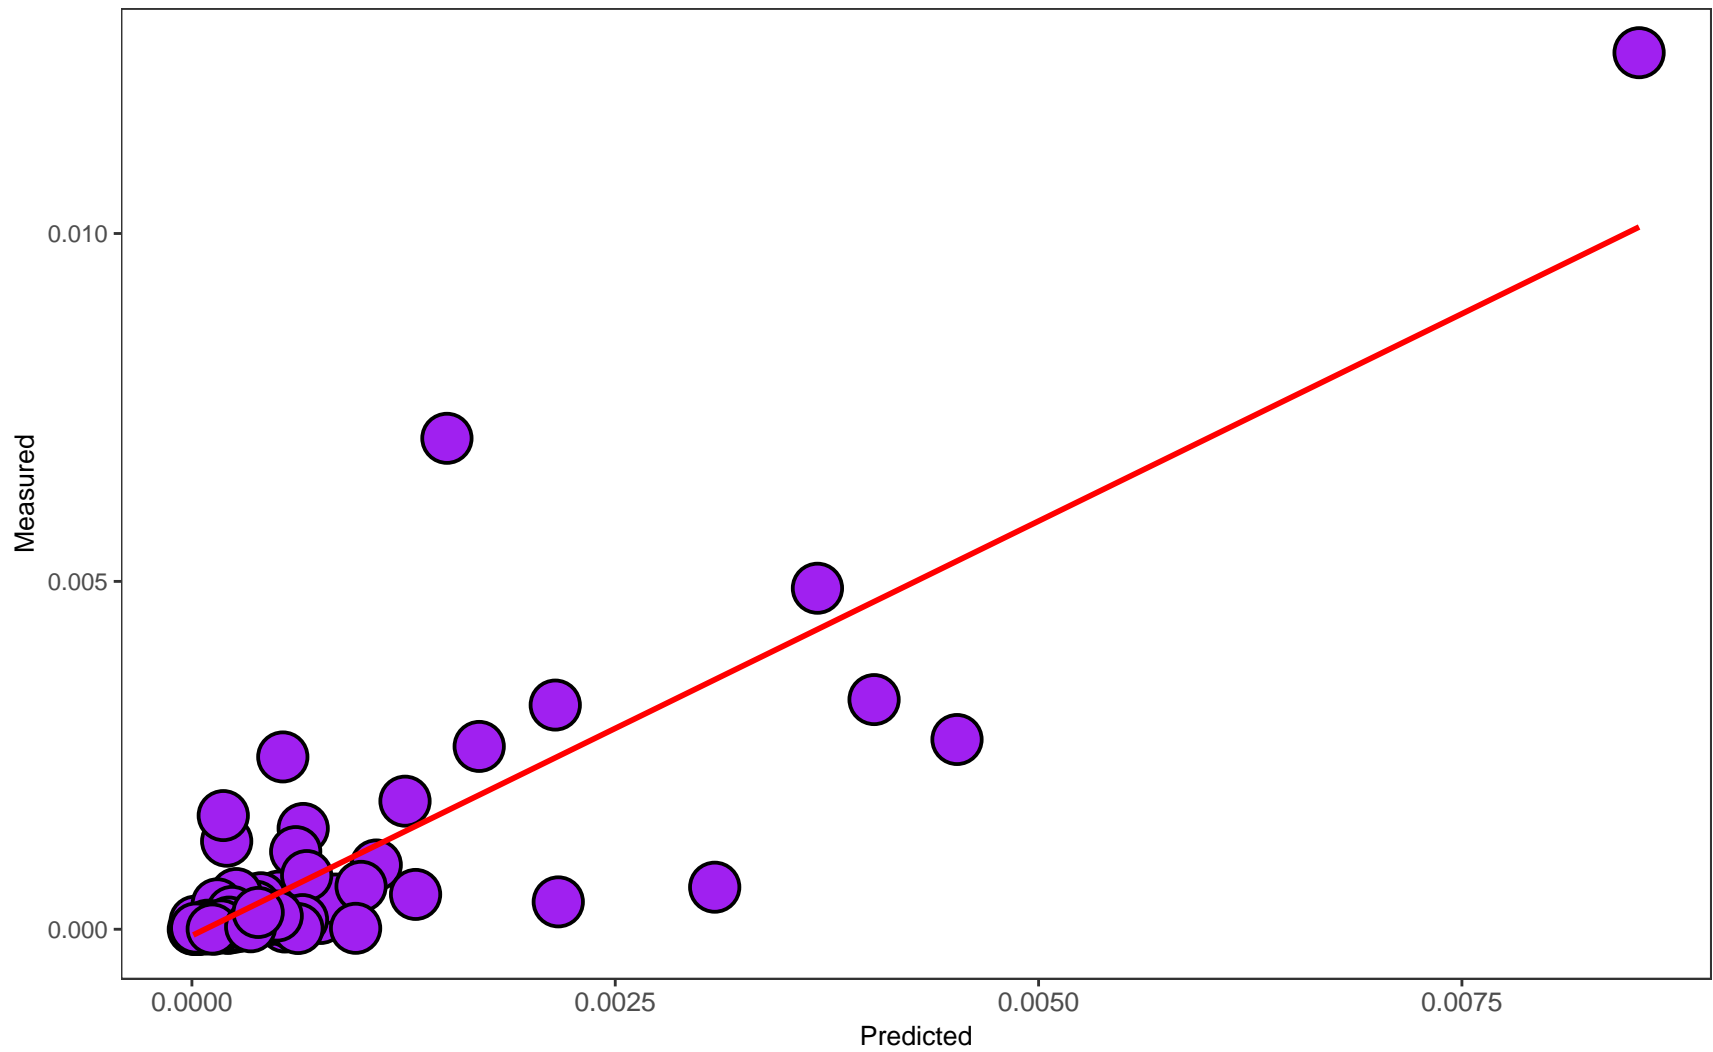

UMCGIBD00539\_UC: Spearman 0.69

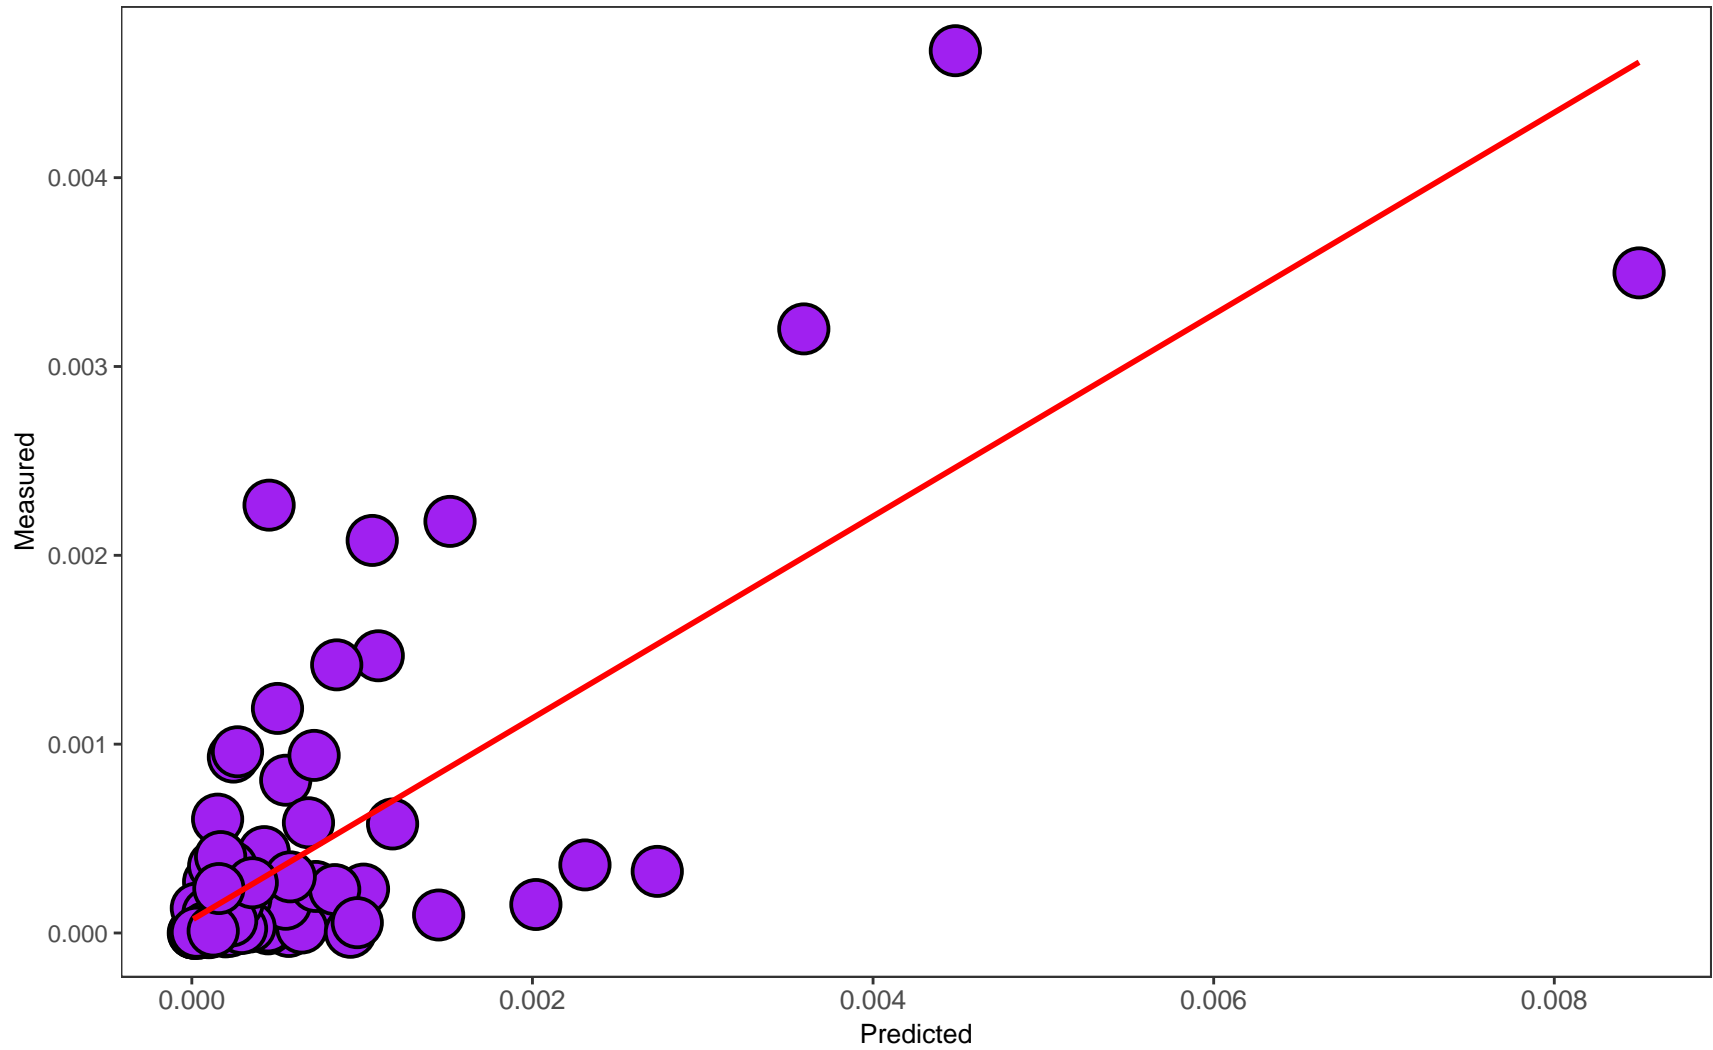

UMCGIBD00077\_CD: Spearman 0.77

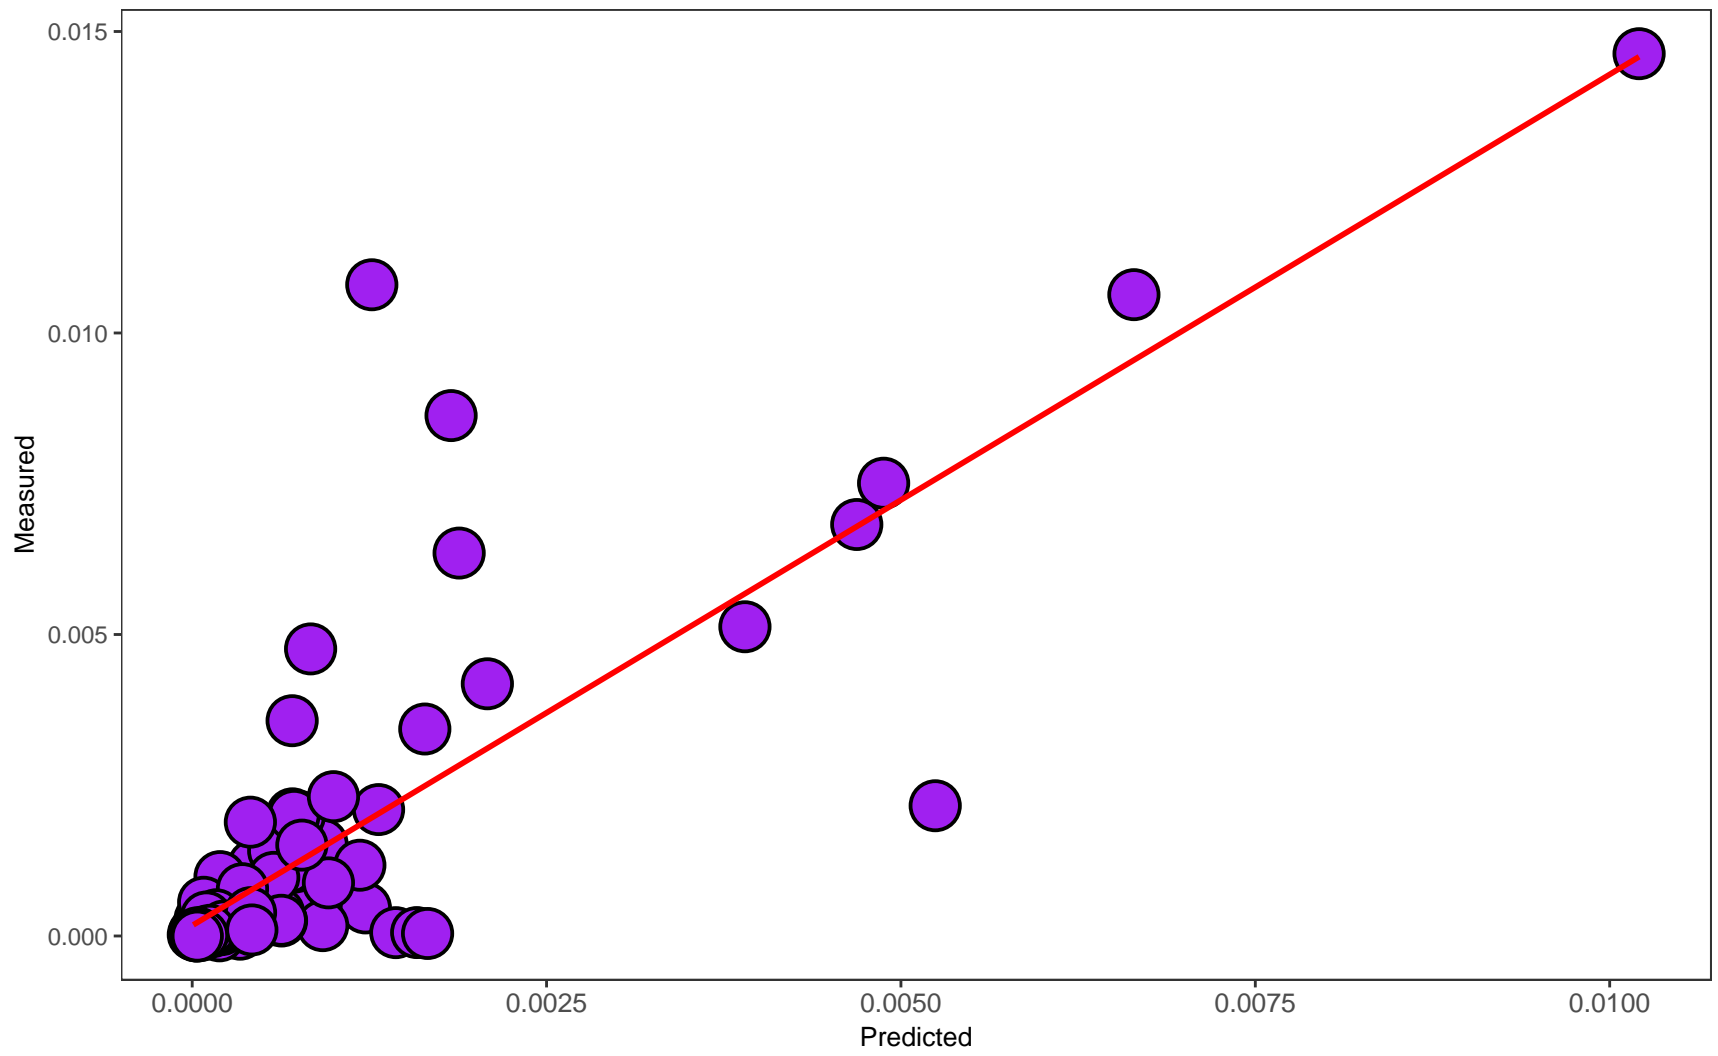

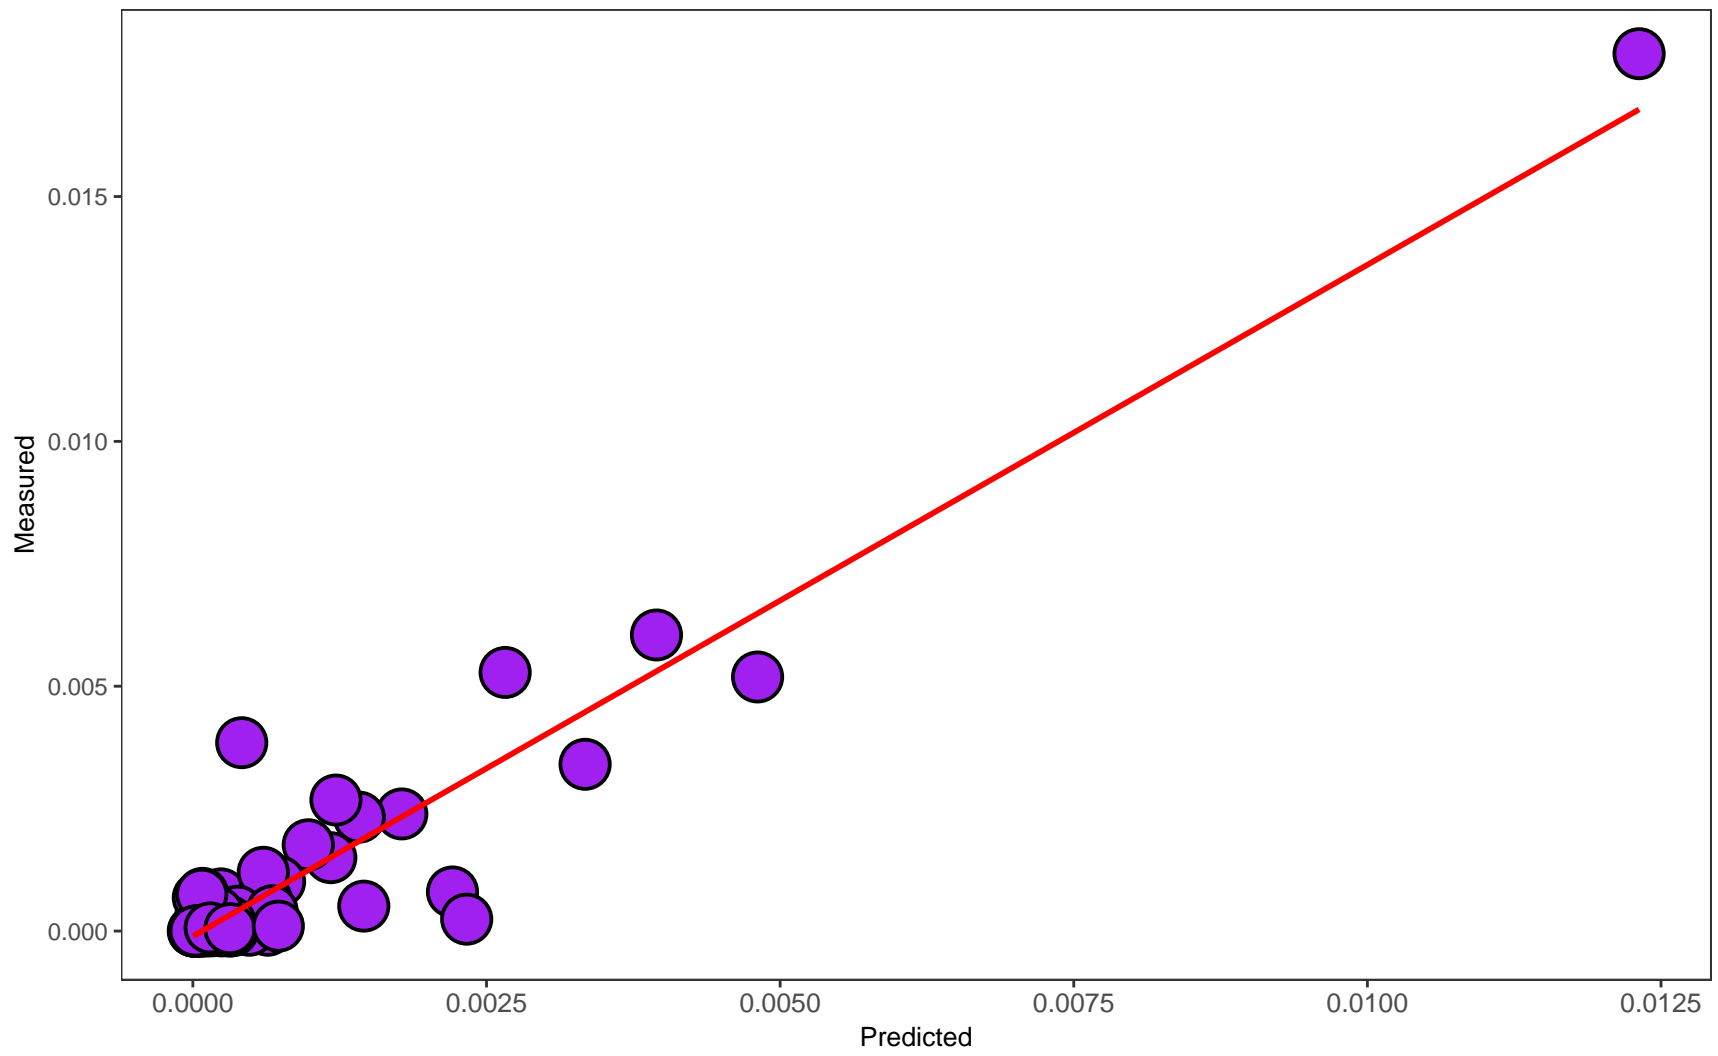

UMCGIBD00389\_UC: Spearman 0.65

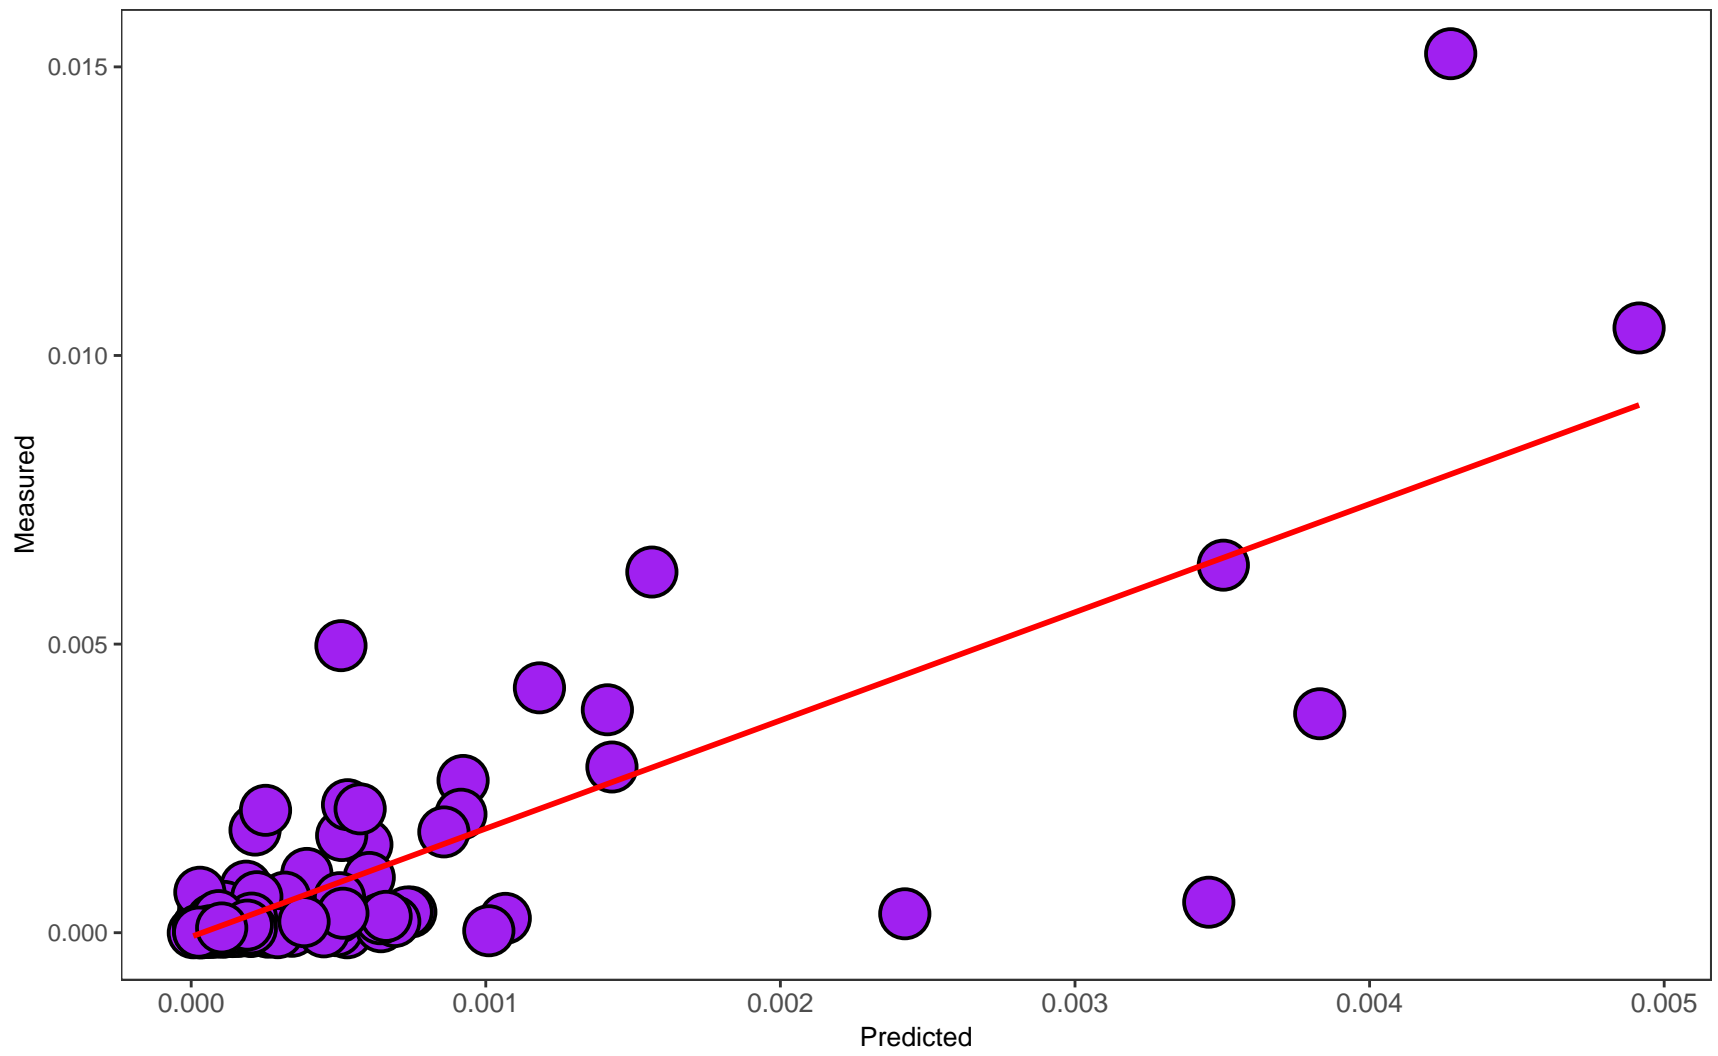

UMCGIBD00112\_CD: Spearman 0.64

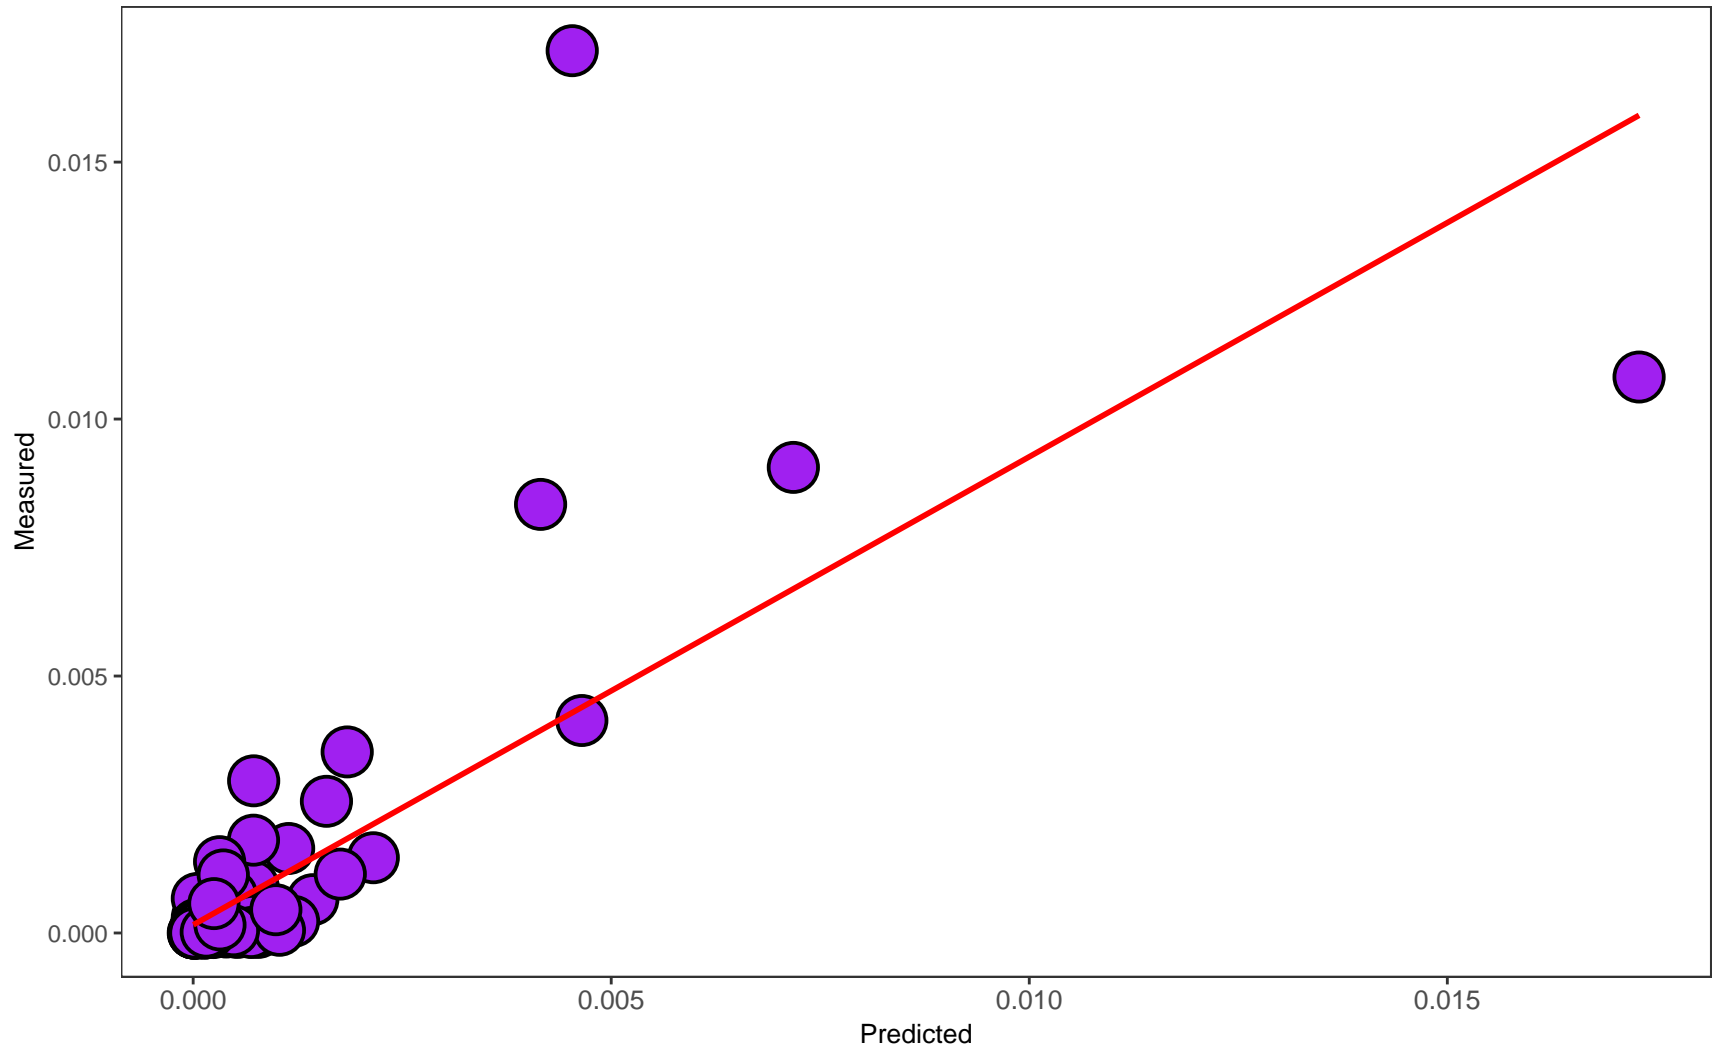

UMCGIBD00508\_CD: Spearman 0.54

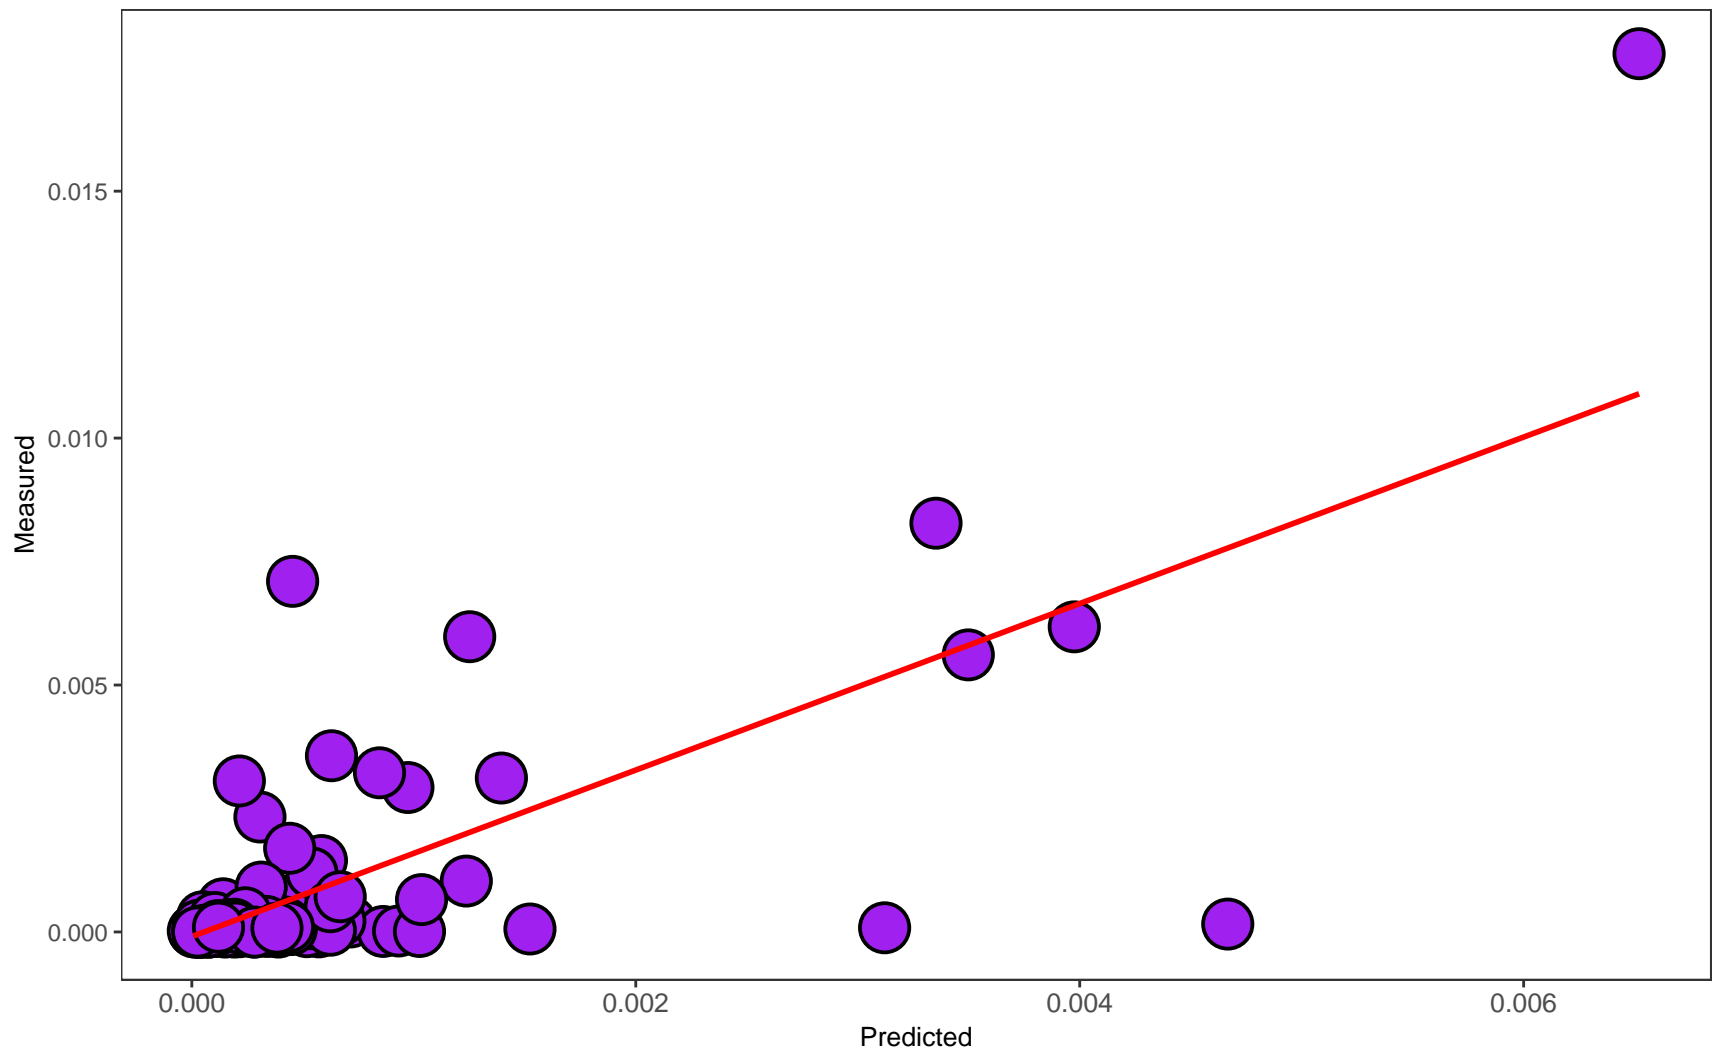

UMCGIBD00588\_UC: Spearman 0.74

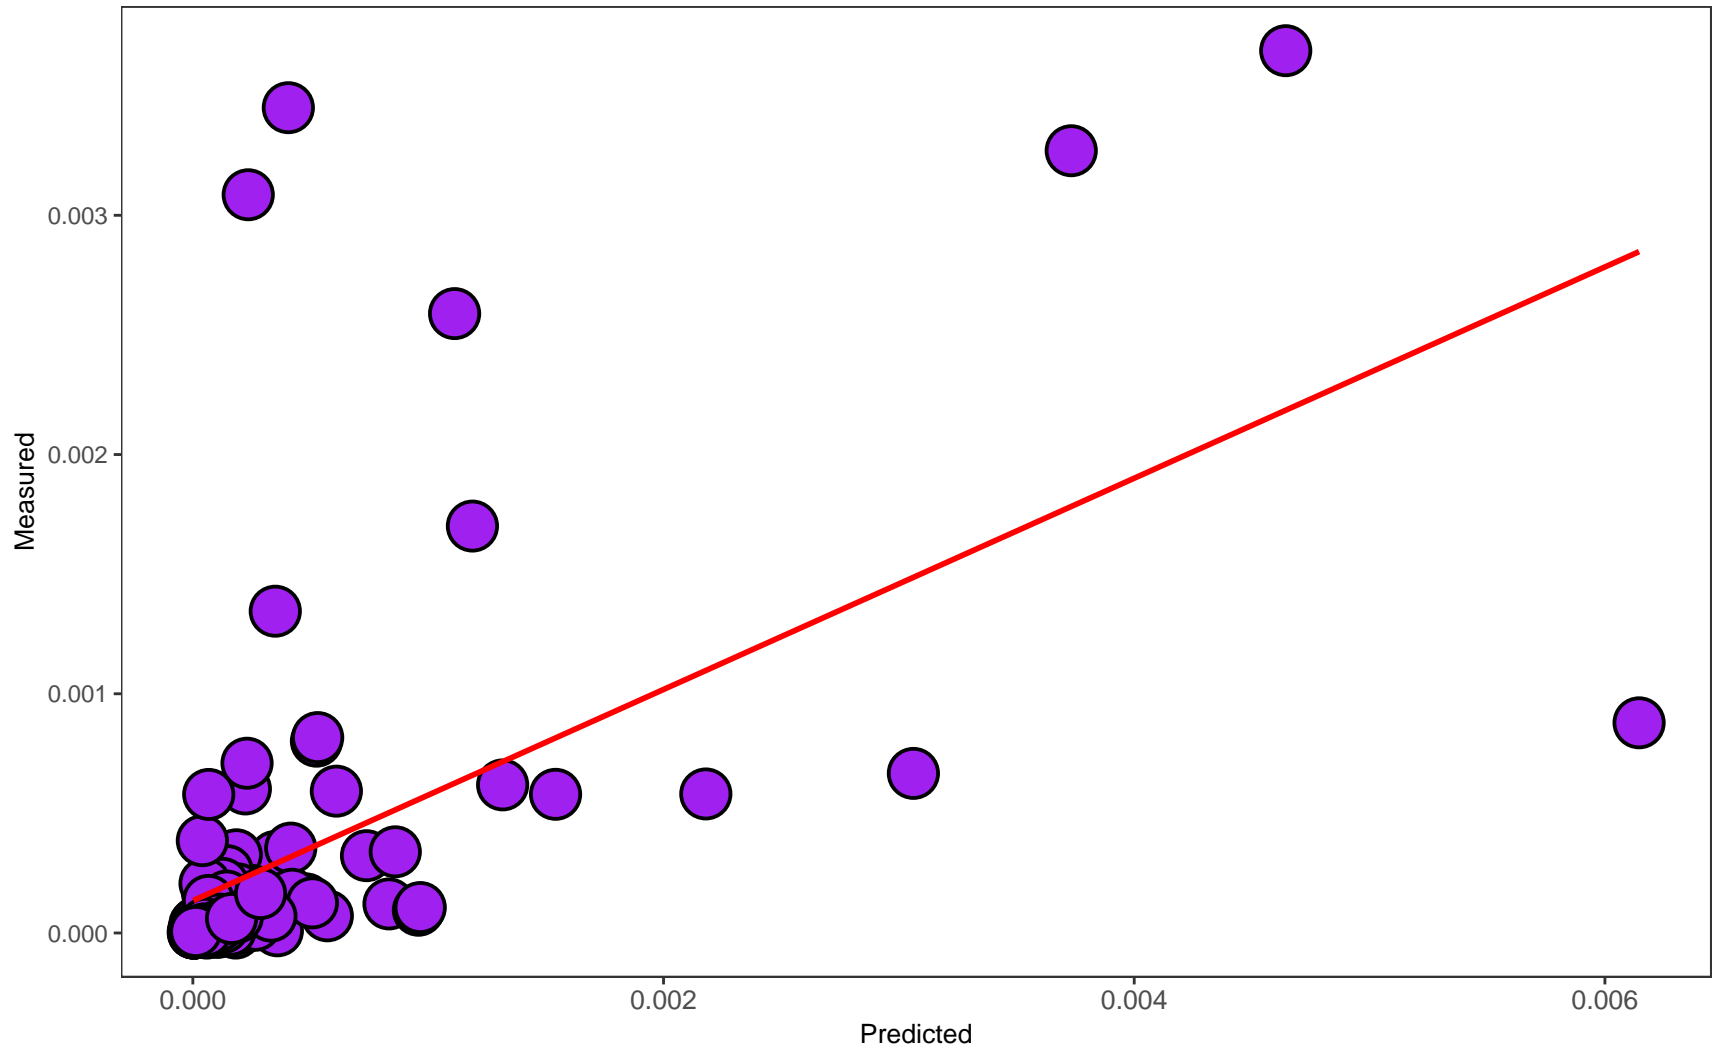



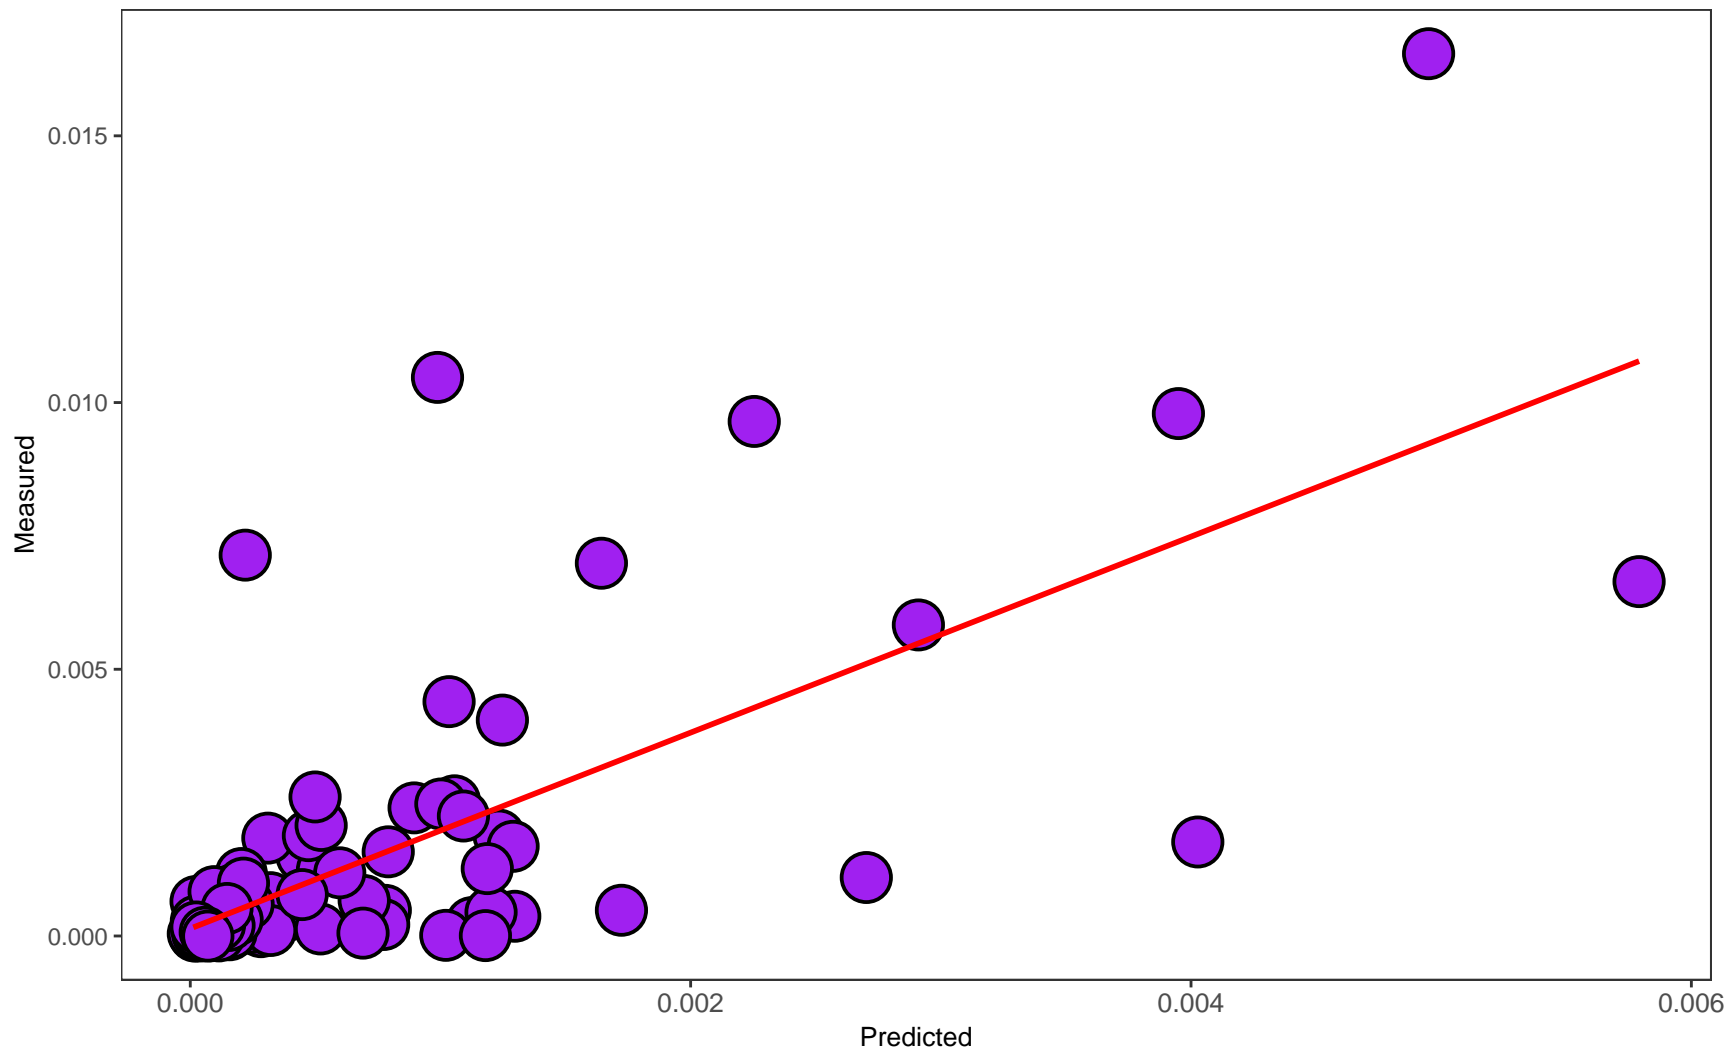

UMCGIBD00393\_UC: Spearman 0.69

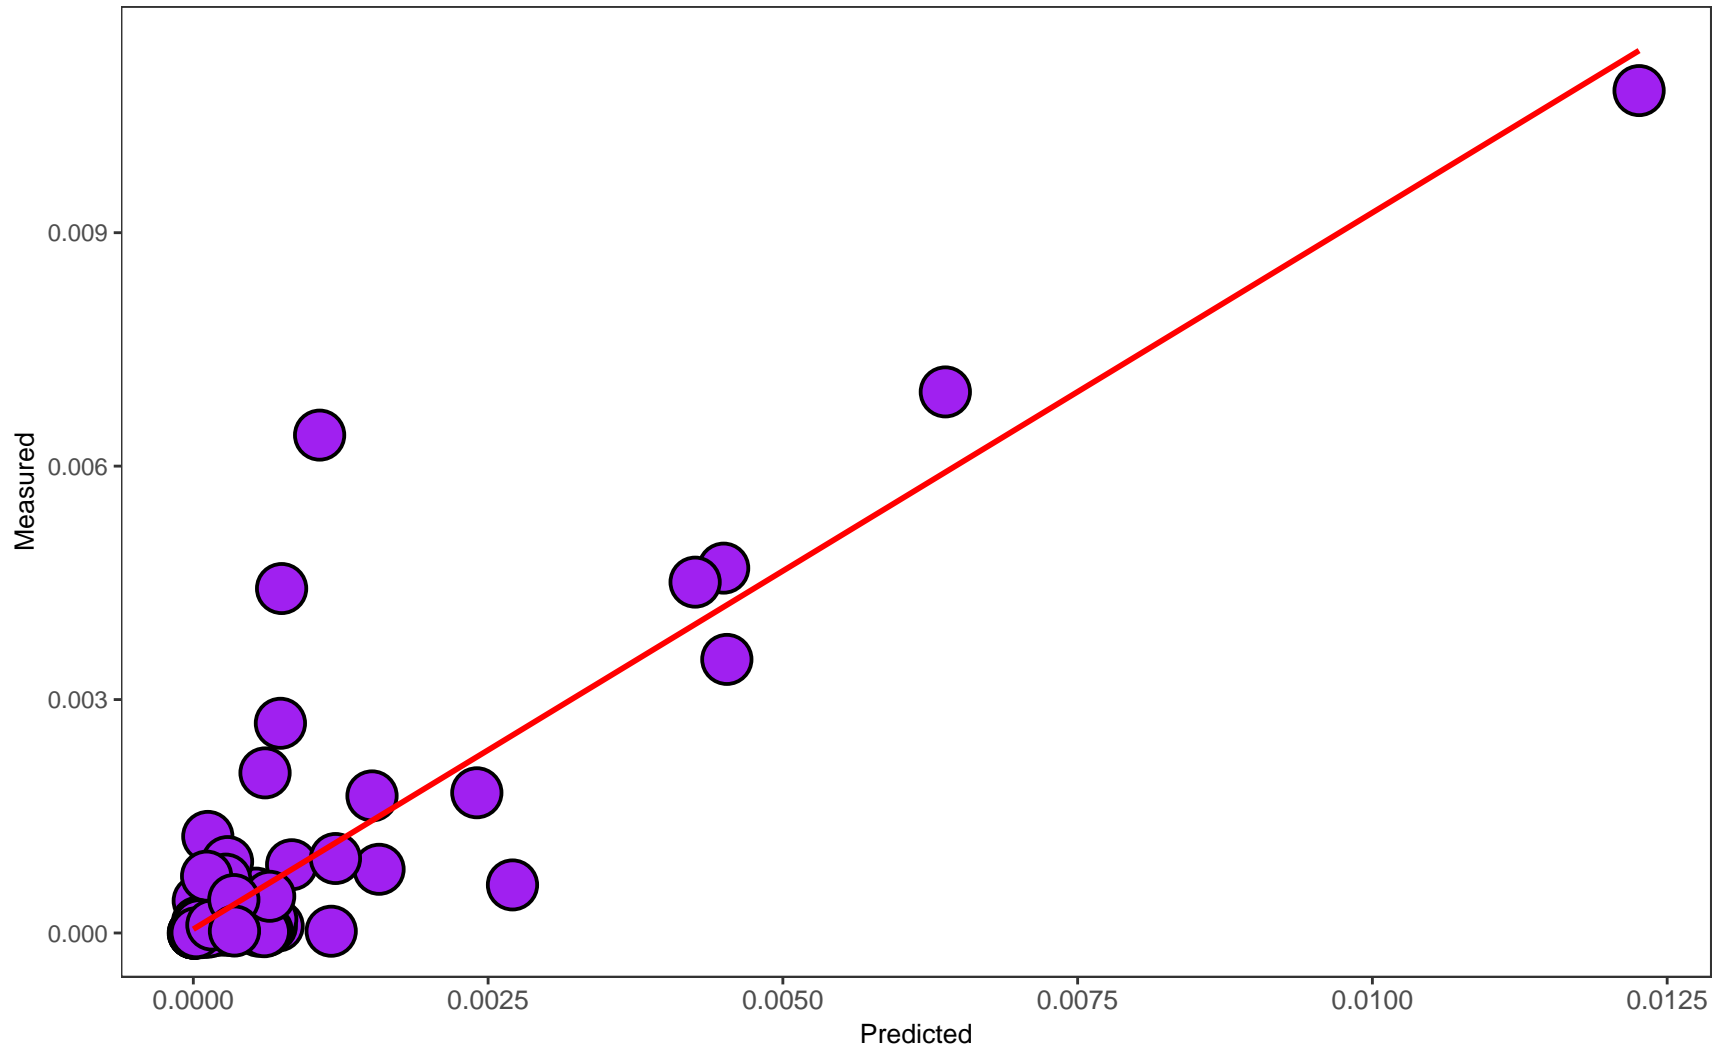

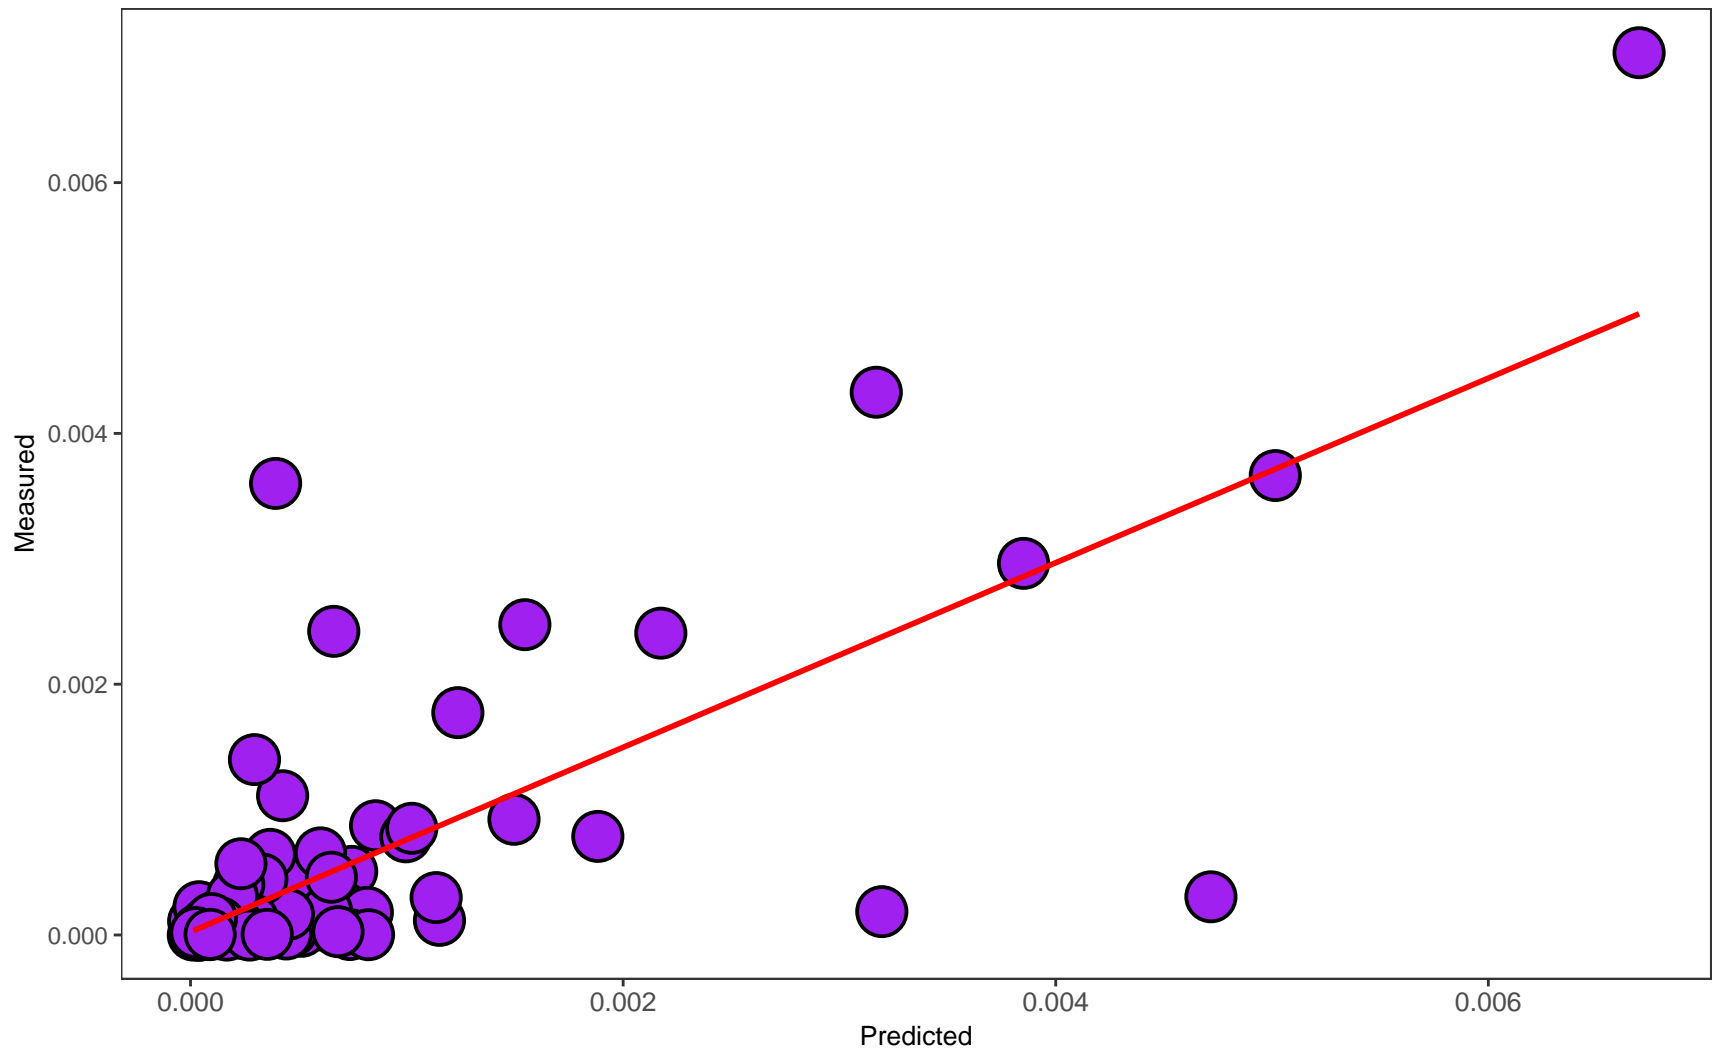

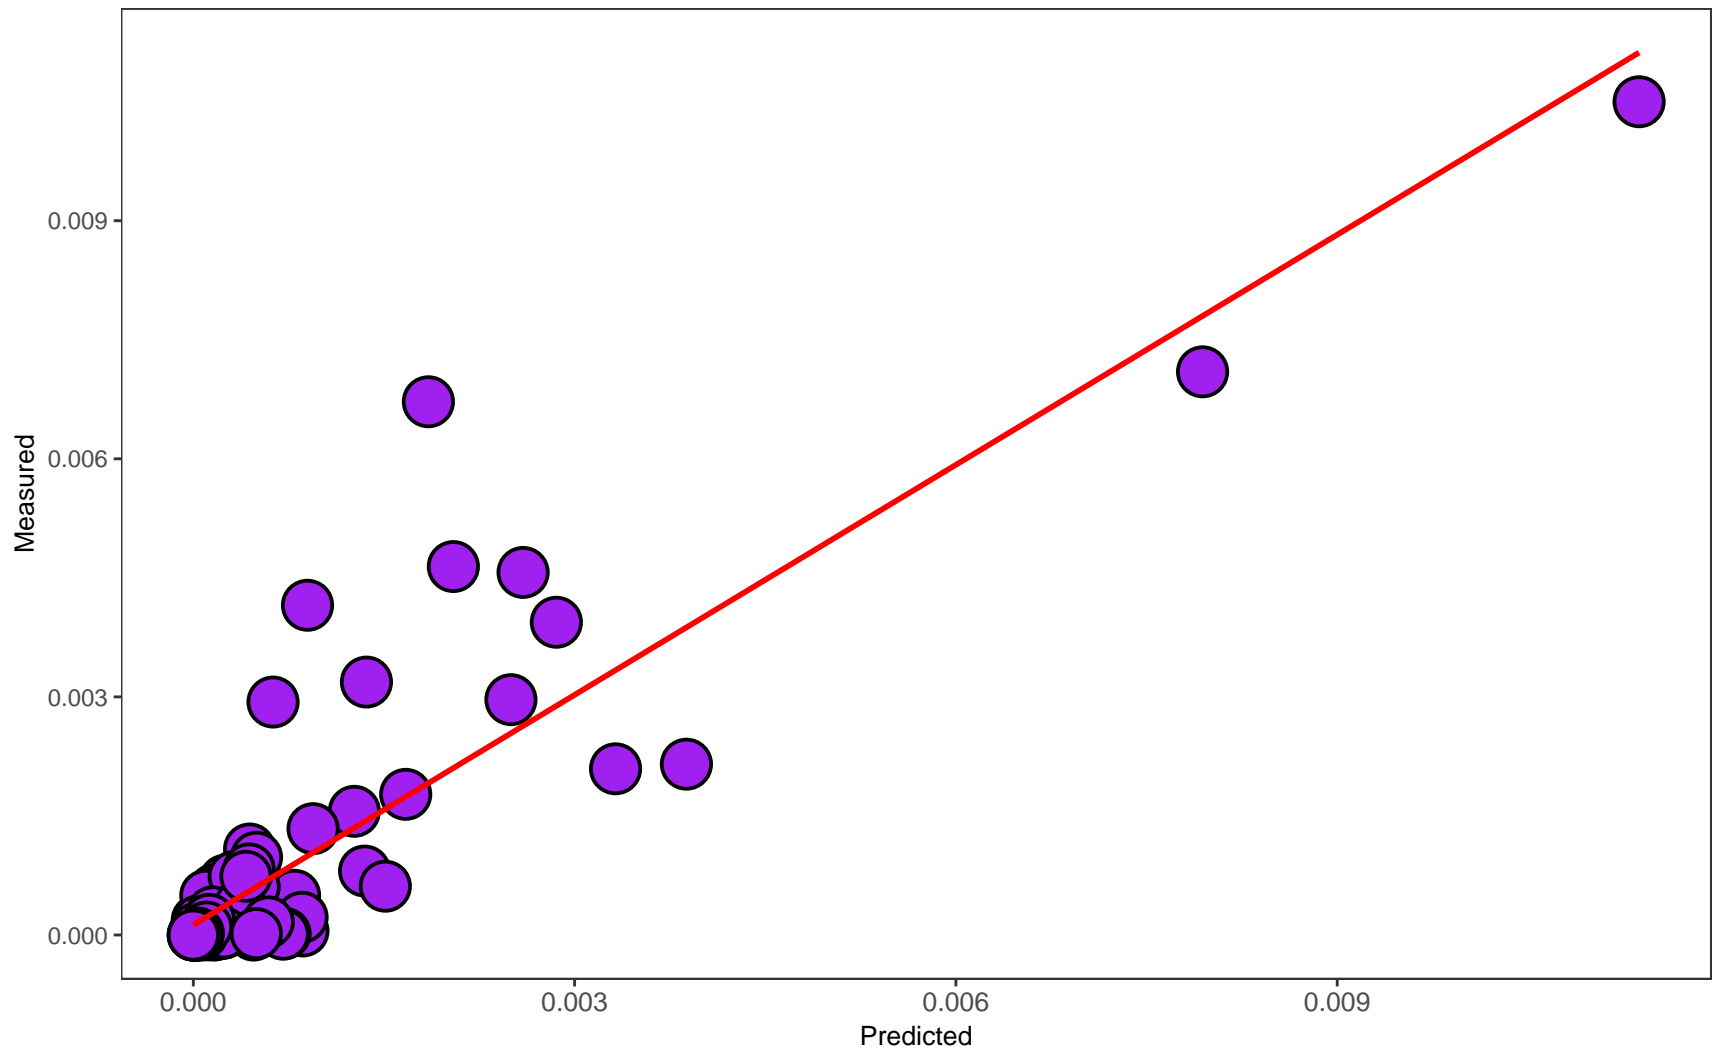

UMCGIBD00593\_UC: Spearman 0.44

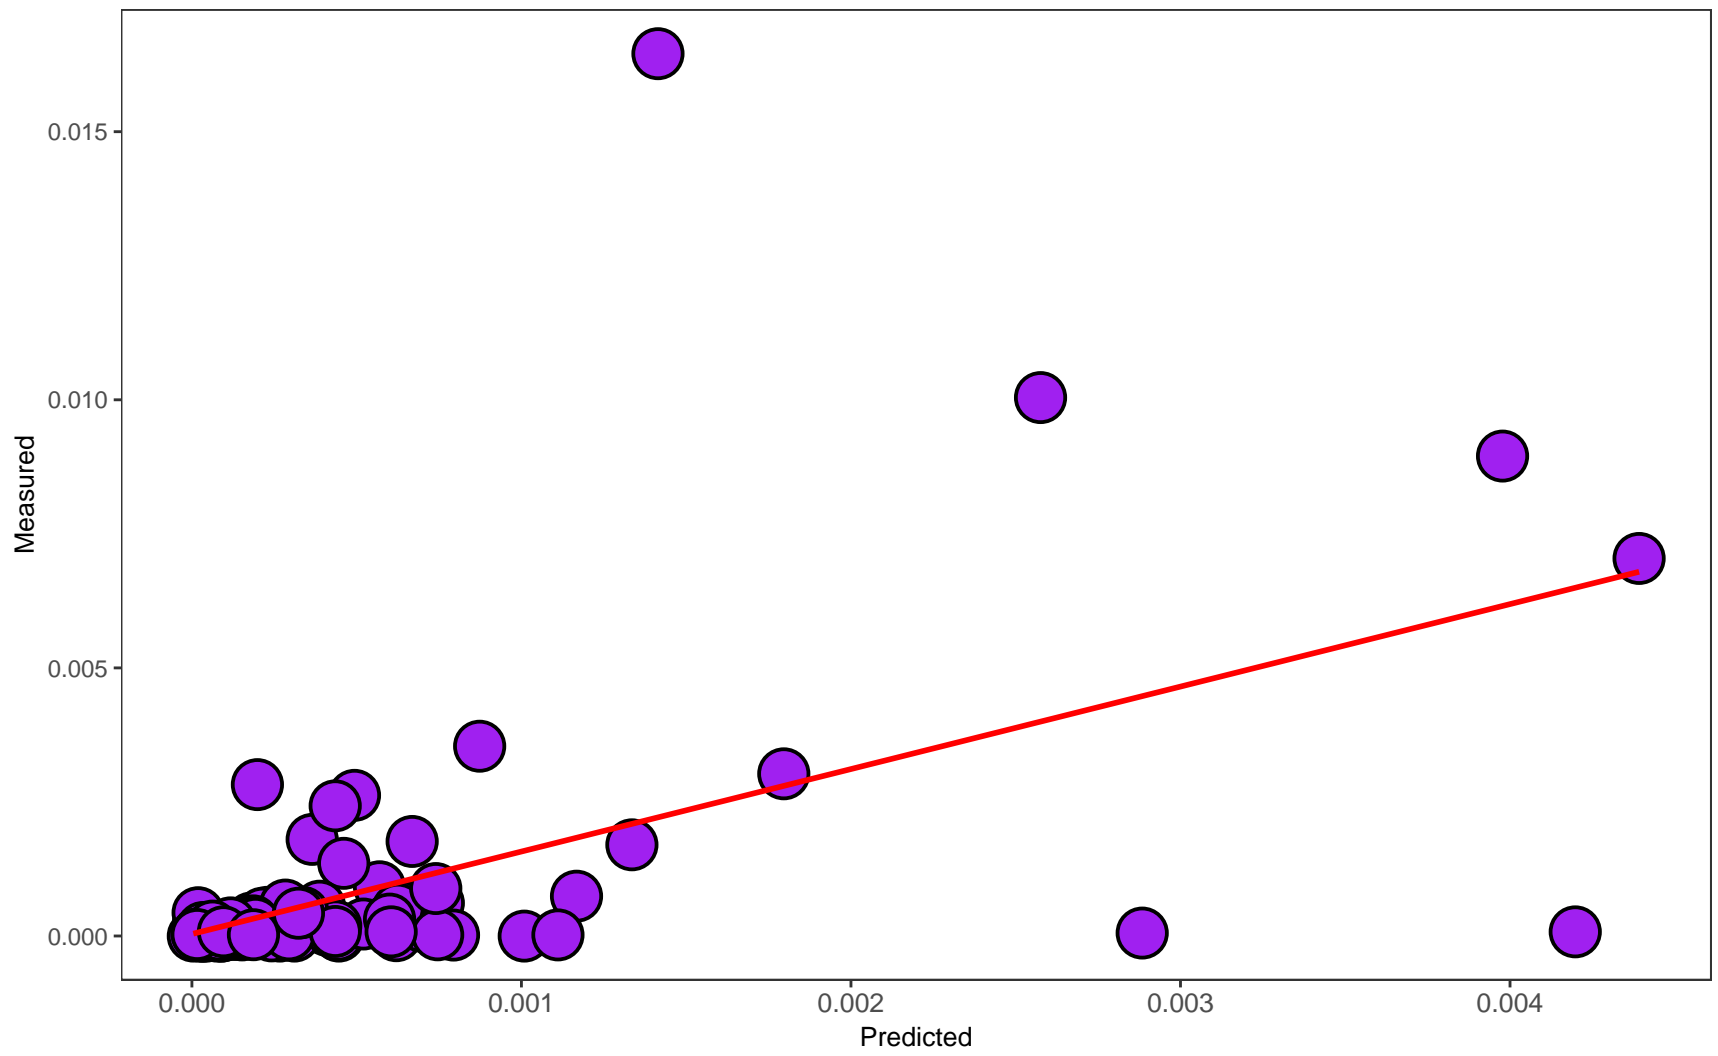

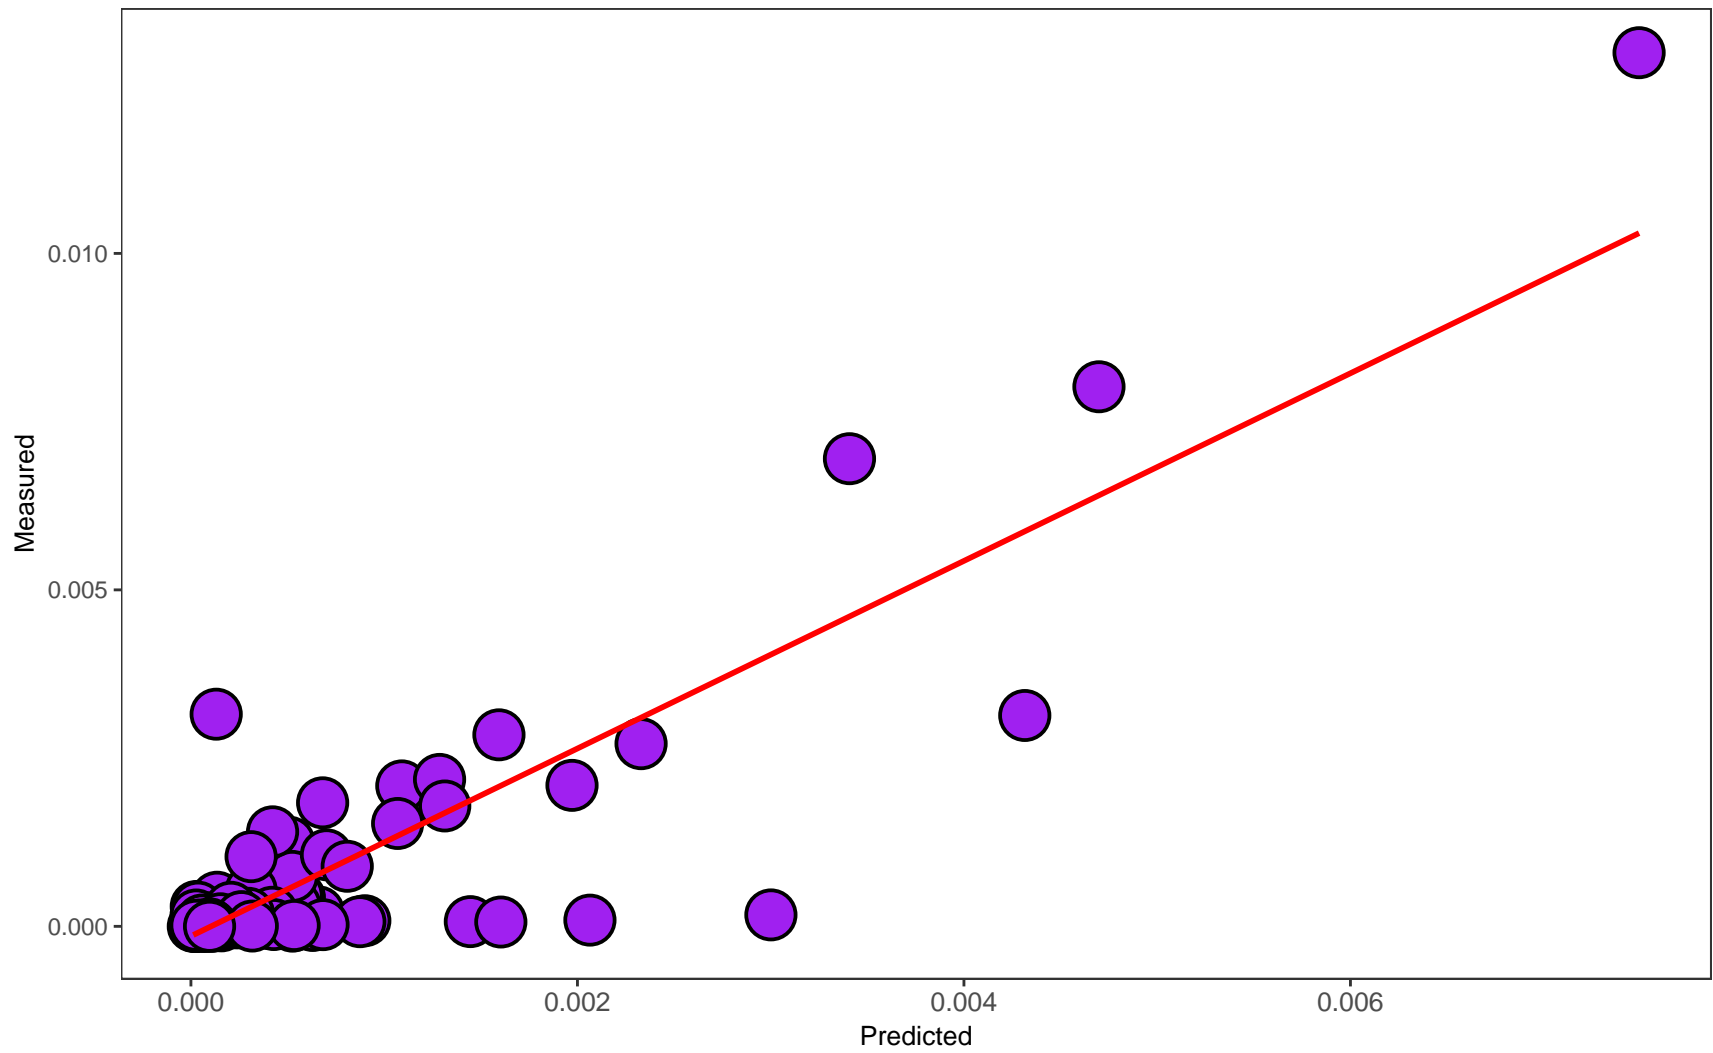

UMCGIBD00238\_CD: Spearman 0.83

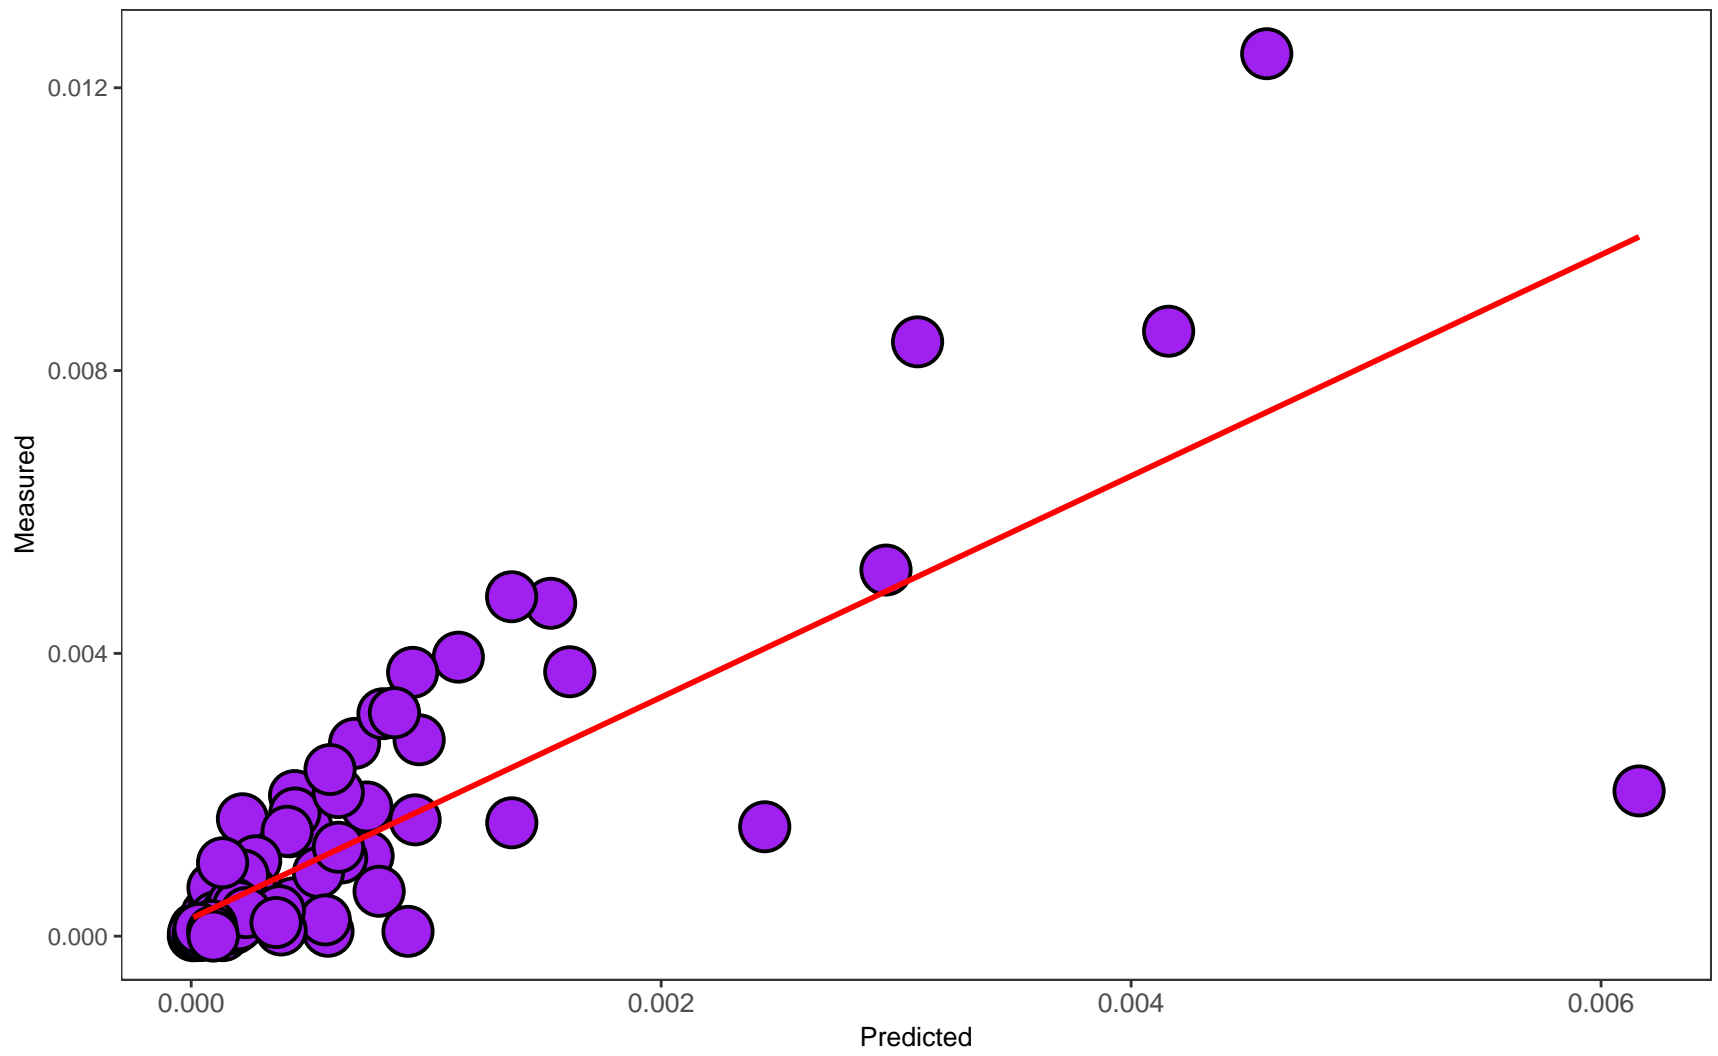

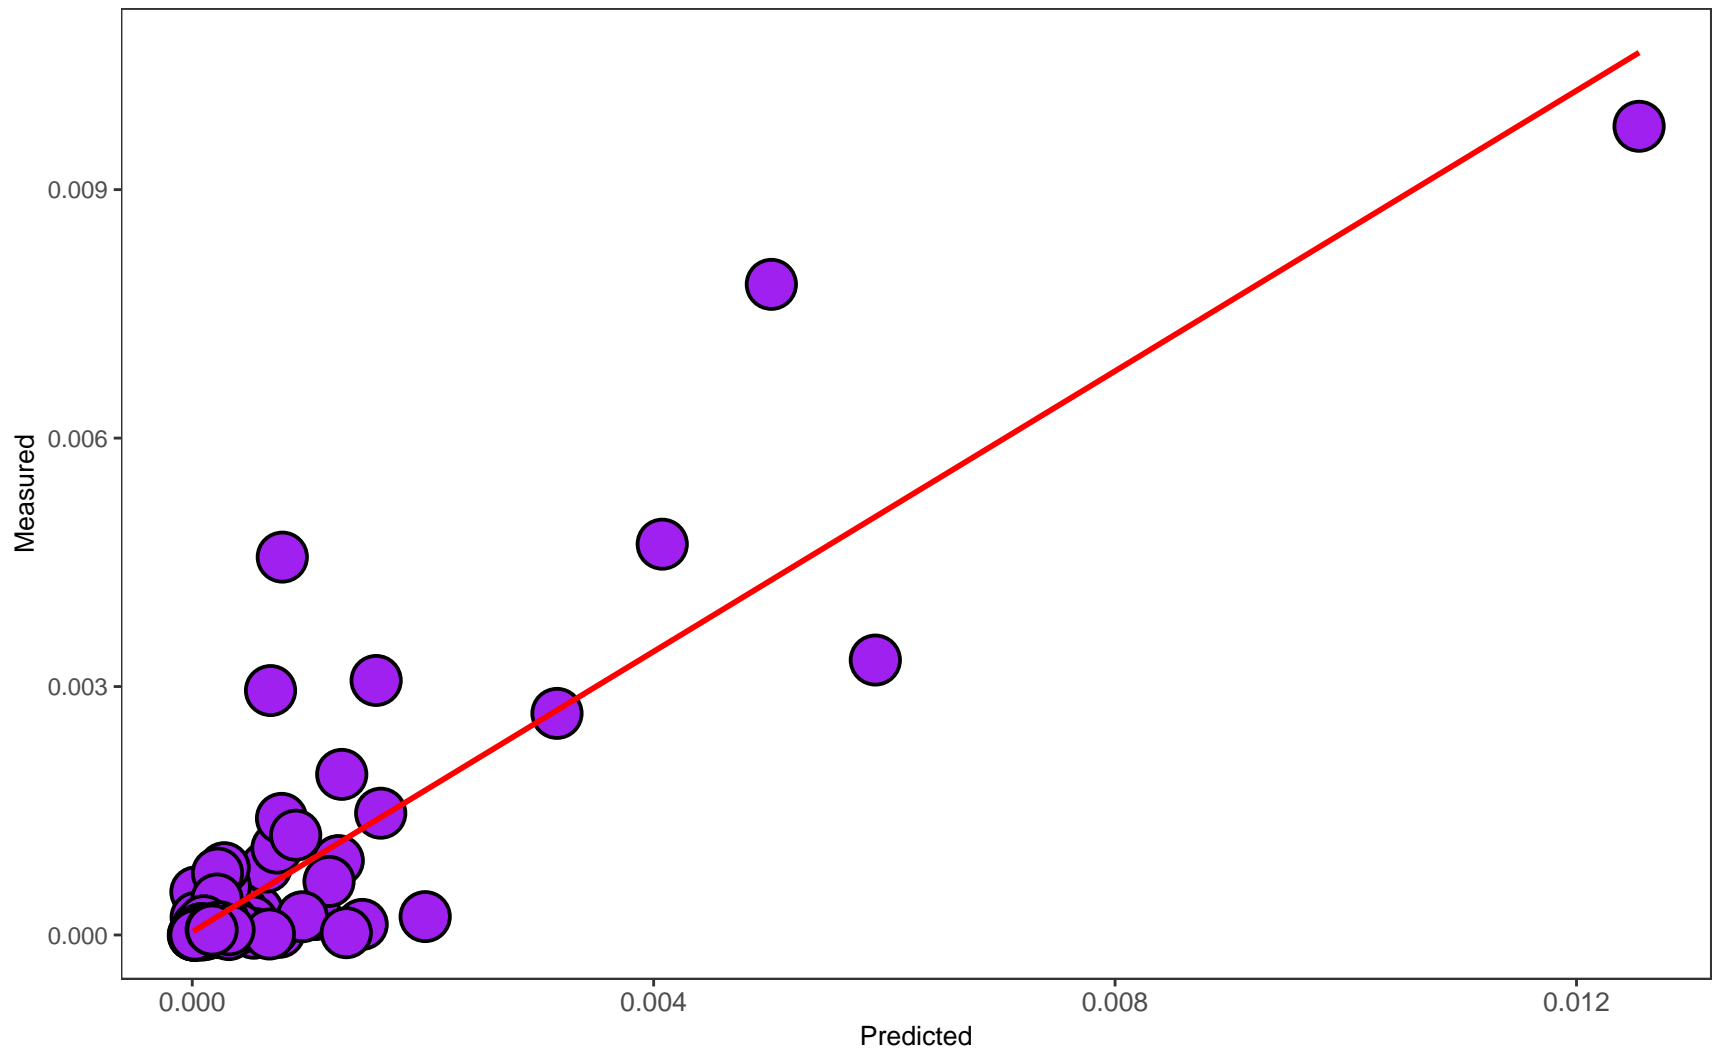



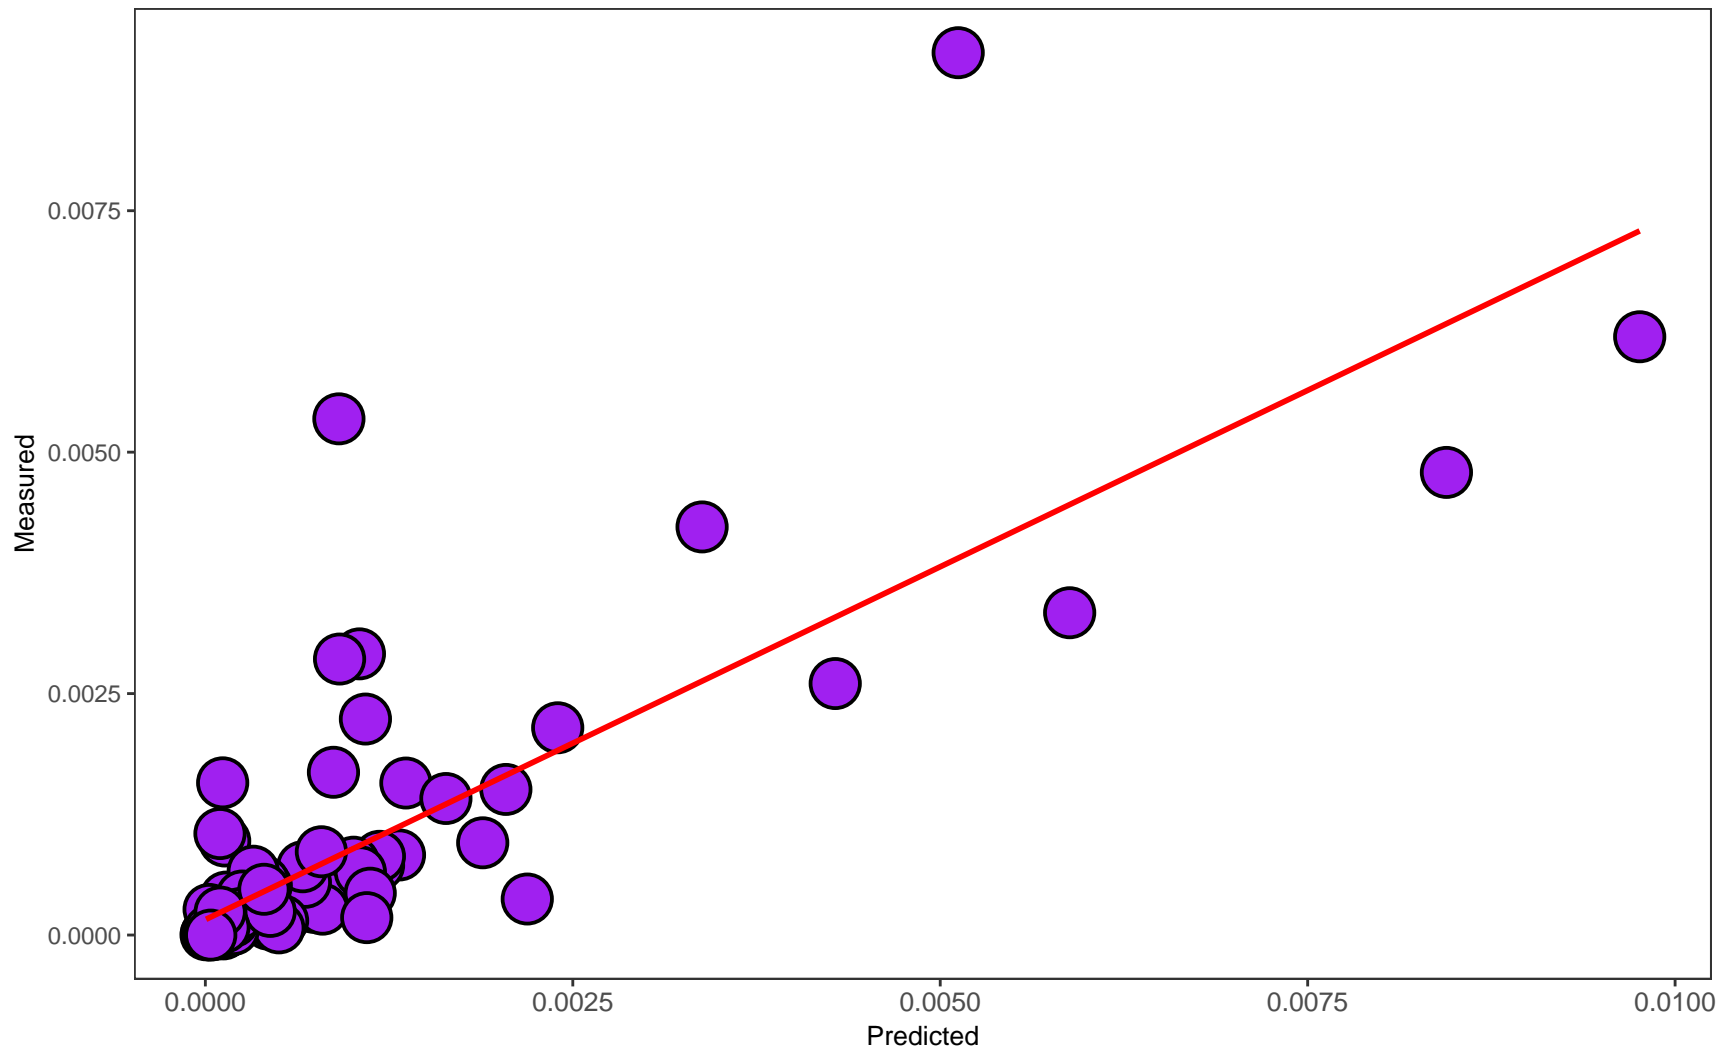

Supplement: 41467_2019_10927_MOESM9_ESM.pdf [file 41467_2019_10927_MOESM9_ESM.pdf]
